# Supplementary material for: Selective cross-coupling of α,β-unsaturated nitriles with aldehydes or alcohols by hydrogen transfer catalysis towards β-ketonitriles and glutaronitriles
Source: Royal Society of Chemistry journal article supplement (doi:10.1039/d4qo00085d), 2024-01-01

*Supporting Information*

**Selective Cross-Coupling of  $\alpha,\beta$ -Unsaturated Nitriles with Aldehydes or Alcohols by Hydrogen Transfer Catalysis towards  $\beta$ -Ketonitriles and Glutaronitriles**

Shi-Qi Zhang,<sup>1,2</sup> and Ji-Bao Xia<sup>\*,1</sup>

<sup>1</sup>State Key Laboratory for Oxo Synthesis and Selective Oxidation, Suzhou Research Institute of LICP, Lanzhou Institute of Chemical Physics (LICP), Chinese Academy of Sciences, Lanzhou 730000, China

<sup>2</sup>University of Chinese Academy of Sciences, Beijing, 100049, China

Corresponding Author: jibaomia@licp.cas.cn

## Table of Contents

|            |                                                                                                         |           |
|------------|---------------------------------------------------------------------------------------------------------|-----------|
| <b>I</b>   | <b>General Information .....</b>                                                                        | <b>3</b>  |
| <b>II</b>  | <b>Optimization of the Reaction Conditions for Cross-Coupling of Alcohol and Acrylonitrile. ....</b>    | <b>4</b>  |
| <b>III</b> | <b>Optimization of the Reaction Conditions for Hydroacylation of Acrylonitrile with Aldehyde. ....</b>  | <b>7</b>  |
| <b>IV</b>  | <b>General Procedure and Characterization Data .....</b>                                                | <b>11</b> |
| <b>V</b>   | <b>Synthetic Transformations of <math>\beta</math>-Ketonitrile and Glutaronitrile Derivatives .....</b> | <b>35</b> |
| <b>VI</b>  | <b>Control Experiments and Mechanistic Studies.....</b>                                                 | <b>38</b> |
| <b>VII</b> | <b>References .....</b>                                                                                 | <b>40</b> |
| <b>VII</b> | <b>NMR Spectra.....</b>                                                                                 | <b>41</b> |

## I General Information

Thin layer chromatography (TLC) employed glass 0.25 mm silica gel plates. Flash chromatography columns were packed with 200-300 mesh silica gel in petroleum (bp. 60-90 °C). The High Resolution MS analyses were performed on Thermo Fisher Scientific LTQ FT Ultra with DART Positive Mode or Agilent 6530 Accurate-Mass Q-TOF LC/MS with ESI mode. GC-MS spectra were recorded on a GCMS-QP2010 SE with helium gas as the carrier gas. NMR spectra were recorded on a 400 MHz for  $^1\text{H}$  NMR and 100 MHz for  $^{13}\text{C}$  NMR, using tetramethylsilane as an internal reference and  $\text{CDCl}_3$  as solvent. Chemical shift values for protons are reported in parts per million (ppm,  $\delta$  scale) downfield from tetramethylsilane and are referenced to residual proton of  $\text{CDCl}_3$  ( $\delta$  7.26), benzene- $d_6$  ( $\delta$  7.16) and DMSO- $d_6$  ( $\delta$  2.50). Multiplicity is indicated by one or more of the following: s (singlet); d (doublet); t (triplet); q (quartet); ddd (doublet of doublet of doublets); m (multiplet); br (broad). Carbon nuclear magnetic resonance spectra ( $^{13}\text{C}$  NMR) were recorded at 100 MHz. Chemical shifts for carbons are reported in parts per million (ppm,  $\delta$  scale) downfield from tetramethylsilane and are referenced to the carbon resonance of  $\text{CDCl}_3$  ( $\delta$  77.16), benzene- $d_6$  ( $\delta$  128.06), and DMSO- $d_6$  ( $\delta$  39.52). The acrylonitrile substrate of 3-phenylacrylonitrile, 3-(4-methoxyphenyl)acrylonitrile, 3-(4-fluorophenyl)acrylonitrile, 3-cyano-cinnamionitrile, 3-nitro-cinnamionitrile, and 2-(2-chlorobenzyl)-3-oxo-3-phenylpropanenitrile were prepared according to known procedures.<sup>1</sup> The other materials were purchased from Tokyo Chemical Industry Co., Aldrich Inc., Alfa Aesar, Adamas, Bidepharm or other commercial suppliers and used as received unless otherwise noted.

## II Optimization of the Reaction Conditions for Cross-Coupling of Alcohol and Acrylonitrile.

**Table S1. The Effect of the Ligands<sup>a</sup>**

| 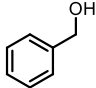 | +                                  | 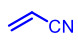 | $\xrightarrow[\text{1,4-dioxane, 120 }^{\circ}\text{C, 16 h}]{\text{RuHCl(CO)(PPh}_3)_3 \text{ (10 mol\%)} \\ \text{ligand (10 or 20 mol\%)}}$ | 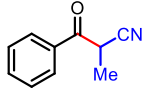 | + | 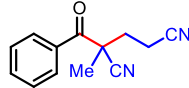 |
|-----------------------------------------------------------------------------------|------------------------------------|-----------------------------------------------------------------------------------|------------------------------------------------------------------------------------------------------------------------------------------------|------------------------------------------------------------------------------------|---|-------------------------------------------------------------------------------------|
| <b>1</b>                                                                          |                                    | <b>2</b>                                                                          |                                                                                                                                                | <b>3</b>                                                                           |   | <b>4</b>                                                                            |
| 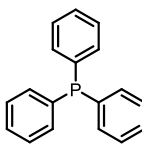 |                                    | 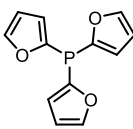 |                                                                                                                                                | 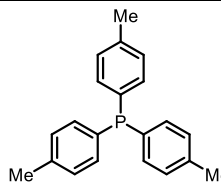  |   | 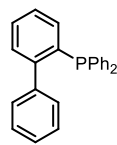  |
| PPh <sub>3</sub>                                                                  |                                    | tri(furan-2-yl)phosphane                                                          |                                                                                                                                                | tri- <i>p</i> -tolylphosphane                                                      |   | DPPBP                                                                               |
|                                                                                   |                                    |                                                                                   |                                                                                                                                                |                                                                                    |   | 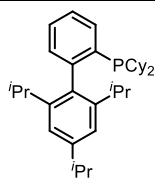 |
|                                                                                   |                                    |                                                                                   |                                                                                                                                                |                                                                                    |   | XPhos                                                                               |
| 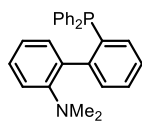 |                                    | 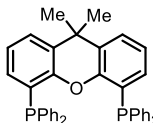 |                                                                                                                                                | 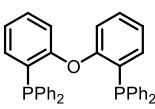  |   | 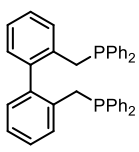  |
| PhDavePhos                                                                        |                                    | XantPhos                                                                          |                                                                                                                                                | DPEPhos                                                                            |   | BISBI                                                                               |
|                                                                                   |                                    |                                                                                   |                                                                                                                                                |                                                                                    |   | 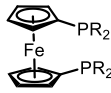 |
|                                                                                   |                                    |                                                                                   |                                                                                                                                                |                                                                                    |   | R = Ph, DPPF<br>R = <i>i</i> Pr, DIPPf<br>R = <i>t</i> Bu, DTBPF<br>R = Cy, DCyPF   |
| Entry                                                                             | Ligand (10 or 20 mol %)            | Yield of <b>3</b> (%) <sup>b</sup>                                                | Yield of <b>4</b> (%) <sup>b</sup>                                                                                                             |                                                                                    |   |                                                                                     |
| 1                                                                                 | -                                  | 18                                                                                | 11                                                                                                                                             |                                                                                    |   |                                                                                     |
| 2                                                                                 | PPh <sub>3</sub> (20)              | 26                                                                                | 18                                                                                                                                             |                                                                                    |   |                                                                                     |
| 3                                                                                 | tri(furan-2-yl)phosphane (20)      | 22                                                                                | 14                                                                                                                                             |                                                                                    |   |                                                                                     |
| 4                                                                                 | tri- <i>p</i> -tolylphosphane (20) | 20                                                                                | 11                                                                                                                                             |                                                                                    |   |                                                                                     |
| 5                                                                                 | DPPBP (20)                         | 16                                                                                | 11                                                                                                                                             |                                                                                    |   |                                                                                     |
| 6                                                                                 | XPhos (20)                         | 16                                                                                | 8                                                                                                                                              |                                                                                    |   |                                                                                     |
| 7                                                                                 | PhDavePhos (20)                    | 30                                                                                | 11                                                                                                                                             |                                                                                    |   |                                                                                     |
| 8                                                                                 | XantPhos (10)                      | 22                                                                                | 17                                                                                                                                             |                                                                                    |   |                                                                                     |
| 9                                                                                 | DPEPhos (10)                       | 32                                                                                | 28                                                                                                                                             |                                                                                    |   |                                                                                     |
| 10                                                                                | BISBI (10)                         | 48                                                                                | 21                                                                                                                                             |                                                                                    |   |                                                                                     |
| 11                                                                                | DPPF (10)                          | 14                                                                                | 6                                                                                                                                              |                                                                                    |   |                                                                                     |
| 12                                                                                | DIPPf(10)                          | 26                                                                                | 9                                                                                                                                              |                                                                                    |   |                                                                                     |
| 13                                                                                | DTBPF (10)                         | 0                                                                                 | 0                                                                                                                                              |                                                                                    |   |                                                                                     |
| <b>14</b>                                                                         | <b>DCyPF (10)</b>                  | <b>50</b>                                                                         | <b>35</b>                                                                                                                                      |                                                                                    |   |                                                                                     |

<sup>a</sup>Reaction conditions: **1** (0.2 mmol), **2** (0.5 mmol), RuHCl(CO)(PPh<sub>3</sub>)<sub>3</sub> (10 mol%), ligand (10 or 20 mol%), 1,4-dioxane (2 mL), 120 °C, 16 h, if otherwise noted. <sup>b</sup>The yield is determined by crude <sup>1</sup>H NMR analysis with 1,1,2,2-tetrachloroethane as internal standard.

**Table S2. The Effect of the Ru Catalyst<sup>a</sup>**
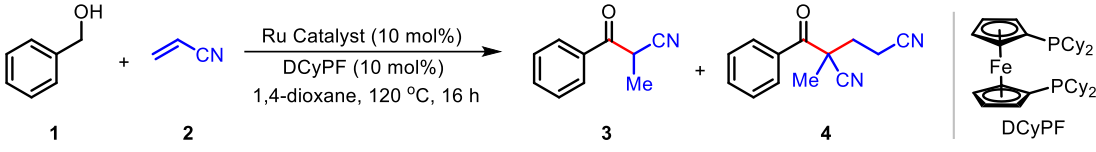

| Entry          | Ru catalyst                                           | Yield of <b>3</b> (%) <sup>b</sup> | Yield of <b>4</b> (%) <sup>b</sup> |
|----------------|-------------------------------------------------------|------------------------------------|------------------------------------|
| <b>1</b>       | <b>RuHCl(CO)(PPh<sub>3</sub>)<sub>3</sub></b>         | <b>50</b>                          | <b>35</b>                          |
| 2              | RuH <sub>2</sub> (CO)(PPh <sub>3</sub> ) <sub>3</sub> | 34                                 | 30                                 |
| 3              | RuH <sub>2</sub> (PPh <sub>3</sub> ) <sub>4</sub>     | 0                                  | 0                                  |
| 4 <sup>c</sup> | Ru <sub>3</sub> (CO) <sub>12</sub>                    | 0                                  | 0                                  |
| 5 <sup>d</sup> | [RuH(Cp)(CO) <sub>2</sub> ] <sub>2</sub>              | 0                                  | 0                                  |
| 6              | -                                                     | 0                                  | 0                                  |

<sup>a</sup>Reaction conditions: **1** (0.2 mmol), **2** (0.5 mmol), Ru catalyst (10 mol%), DCyPF (10 mol%), 1,4-dioxane (2 mL), 120 °C, 16 h, if otherwise noted. <sup>b</sup>The yield is determined by crude <sup>1</sup>H NMR analysis with 1,1,2,2-tetrachloroethane as internal standard. <sup>c</sup>with Ru<sub>3</sub>(CO)<sub>12</sub> (3.3 mol%), <sup>d</sup>with [RuH(Cp)(CO)<sub>2</sub>]<sub>2</sub> (5 mol%)

**Table S3. The Effect of the Ratio of Substrates<sup>a</sup>**
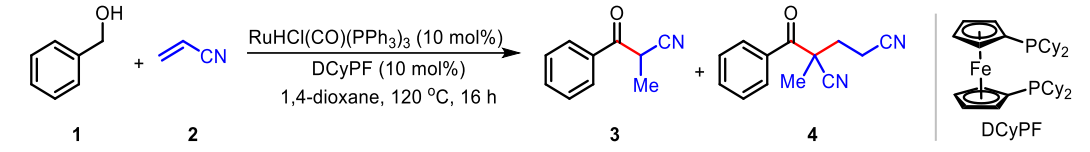

| Entry    | <b>2</b> (x equiv.) | Yield of <b>3</b> (%) <sup>b</sup> | Yield of <b>4</b> (%) <sup>b</sup> |
|----------|---------------------|------------------------------------|------------------------------------|
| 1        | 1.0                 | 38                                 | 0                                  |
| 2        | 1.5                 | 60                                 | 3                                  |
| <b>3</b> | <b>2.0</b>          | <b>74</b>                          | <b>9</b>                           |
| 4        | 2.5                 | 50                                 | 35                                 |

<sup>a</sup>Reaction conditions: **1** (0.2 mmol), **2** (x equiv), RuHCl(CO)(PPh<sub>3</sub>)<sub>3</sub> (10 mol%), DCyPF (10 mol%), 1,4-dioxane (2 mL), 120 °C, 16 h, if otherwise noted. <sup>b</sup>The yield is determined by crude <sup>1</sup>H NMR analysis with 1,1,2,2-tetrachloroethane as internal standard.

**Table S4. The Effect of Solvent and Reaction Temperature<sup>a</sup>**
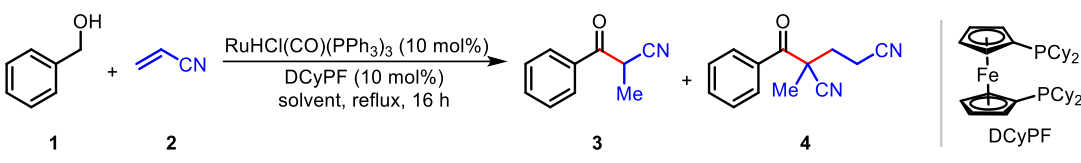

| Entry | Solvent                           | Temperature (°C) | Yield of <b>3</b> (%) <sup>b</sup> | Yield of <b>4</b> (%) <sup>b</sup> |
|-------|-----------------------------------|------------------|------------------------------------|------------------------------------|
| 1     | 1,4-dioxane                       | 120              | 74                                 | 9                                  |
| 2     | <b>DME</b>                        | <b>85</b>        | <b>72</b>                          | <b>27</b>                          |
| 3     | CH <sub>3</sub> OH                | 85               | 0                                  | 0                                  |
| 4     | CH <sub>3</sub> O <sup>t</sup> Bu | 85               | 42                                 | 38                                 |
| 5     | DCE                               | 85               | trace                              | trace                              |
| 6     | benzene                           | 85               | 46                                 | 38                                 |
| 7     | CH <sub>3</sub> CN                | 85               | trace                              | trace                              |
| 8     | THF                               | 85               | 50                                 | 30                                 |
| 9     | toluene                           | 120              | 58                                 | 24                                 |
| 10    | NMP                               | 120              | trace                              | trace                              |
| 11    | DMF                               | 120              | trace                              | trace                              |
| 12    | DME                               | 65               | 64                                 | 12                                 |

<sup>a</sup>Reaction conditions: **1** (0.2 mmol), **2** (2.0 equiv), RuHCl(CO)(PPh<sub>3</sub>)<sub>3</sub> (10 mol%), DCyPF (10 mol%), solvent (2 mL), Temperature (°C), 16 h, if otherwise noted. <sup>b</sup>The yield is determined by crude <sup>1</sup>H NMR analysis with 1,1,2,2-tetrachloroethane as internal standard. DME: 1,2-dimethoxyethane.

**Table S5. The Effect of Reaction Time<sup>a</sup>**
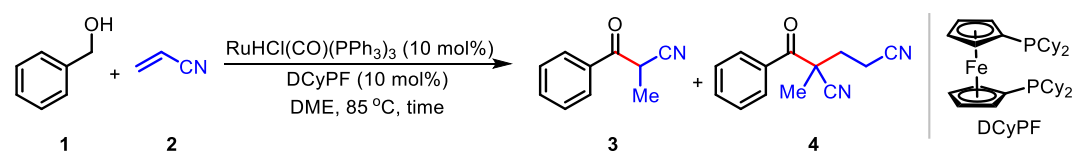

| Entry                | Time (h)  | Yield of <b>3</b> (%) <sup>b</sup> | Yield of <b>4</b> (%) <sup>b</sup> |
|----------------------|-----------|------------------------------------|------------------------------------|
| 1                    | 1         | 72                                 | 8                                  |
| 2                    | 4         | <b>82 (67)</b>                     | <b>4</b>                           |
| 3                    | 6         | 82                                 | 10                                 |
| 4                    | 16        | 72                                 | 27                                 |
| <b>5<sup>c</sup></b> | <b>12</b> | <b>2</b>                           | <b>65 (62)</b>                     |

<sup>a</sup>Reaction conditions: **1** (0.2 mmol), **2** (2.0 equiv), RuHCl(CO)(PPh<sub>3</sub>)<sub>3</sub> (10 mol%), DCyPF (10 mol%), DME (2 mL), 85 °C, 16 h, if otherwise noted. <sup>b</sup>The yield is determined by crude <sup>1</sup>H NMR analysis with 1,1,2,2-tetrachloroethane as internal standard and isolated yield in the parenthesis. <sup>c</sup>With **2** (5.0 equiv)

### III Optimization of the Reaction Conditions for Hydroacylation of Acrylonitrile with Aldehyde.

**Table S6. The Effect of the Ru Catalyst and Ligands<sup>a</sup>**

| <p>R = Ph, DPPF<br/>R = <i>i</i>Pr, DiPPF<br/>R = <i>t</i>Bu, DtBPF<br/>R = Cy, DCyPF</p> |                                                       |                                                     |                                    |                                    |
|-------------------------------------------------------------------------------------------|-------------------------------------------------------|-----------------------------------------------------|------------------------------------|------------------------------------|
| Entry                                                                                     | Ru catalyst                                           | Ligand (10 or 20 mol %)                             | Yield of <b>3</b> (%) <sup>b</sup> | Yield of <b>4</b> (%) <sup>b</sup> |
| 1                                                                                         | RuHCl(CO)(PPh <sub>3</sub> ) <sub>3</sub>             | -                                                   | 0                                  | 0                                  |
| 2                                                                                         | RuH <sub>2</sub> (CO)(PPh <sub>3</sub> ) <sub>3</sub> | -                                                   | 0                                  | 0                                  |
| 3                                                                                         | RuHCl(CO)(PPh <sub>3</sub> ) <sub>3</sub>             | PPh <sub>3</sub> (20)                               | 0                                  | 0                                  |
| 4                                                                                         | RuHCl(CO)(PPh <sub>3</sub> ) <sub>3</sub>             | PCy <sub>3</sub> (20)                               | 0                                  | 0                                  |
| 5                                                                                         | RuHCl(CO)(PPh <sub>3</sub> ) <sub>3</sub>             | tri- <i>p</i> -tolylphosphane (20)                  | 5                                  | 12                                 |
| 6                                                                                         | RuHCl(CO)(PPh <sub>3</sub> ) <sub>3</sub>             | P(C <sub>6</sub> F <sub>5</sub> ) <sub>3</sub> (20) | 0                                  | 0                                  |
| 7                                                                                         | RuHCl(CO)(PPh <sub>3</sub> ) <sub>3</sub>             | XPhos (20)                                          | 0                                  | 0                                  |
| 8                                                                                         | RuHCl(CO)(PPh <sub>3</sub> ) <sub>3</sub>             | PhDavePhos (20)                                     | 0                                  | 0                                  |
| 9                                                                                         | RuHCl(CO)(PPh <sub>3</sub> ) <sub>3</sub>             | XantPhos (10)                                       | 0                                  | 0                                  |
| 10                                                                                        | RuHCl(CO)(PPh <sub>3</sub> ) <sub>3</sub>             | DPEPhos (10)                                        | 10                                 | 13                                 |
| 11                                                                                        | RuHCl(CO)(PPh <sub>3</sub> ) <sub>3</sub>             | Cy-DPEPhos (10)                                     | 0                                  | 0                                  |
| 12                                                                                        | RuHCl(CO)(PPh <sub>3</sub> ) <sub>3</sub>             | DPPF (10)                                           | trace                              | trace                              |
| 13                                                                                        | RuHCl(CO)(PPh <sub>3</sub> ) <sub>3</sub>             | DiPPF (10)                                          | 14                                 | 24                                 |
| 14                                                                                        | RuHCl(CO)(PPh <sub>3</sub> ) <sub>3</sub>             | DtBPF (10)                                          | trace                              | trace                              |
| <b>15</b>                                                                                 | <b>RuHCl(CO)(PPh<sub>3</sub>)<sub>3</sub></b>         | <b>DCyPF (10)</b>                                   | <b>25</b>                          | <b>17</b>                          |

<sup>a</sup>Reaction conditions: **5** (0.2 mmol), **2** (0.2 mmol), Ru catalyst (10 mol%), ligand (10 mol% or 20 mol%), DME (2 mL), 85 °C, 6 h, if otherwise noted. <sup>b</sup>Determined by GC with dodecane as an internal standard.

**Table S7. The Effect of the Additives<sup>a</sup>**

| Entry | Additive (5 or 10 mol %)                  | Yield of <b>3</b> (%) <sup>b</sup> | Yield of <b>4</b> (%) <sup>b</sup> |
|-------|-------------------------------------------|------------------------------------|------------------------------------|
| 1     | -                                         | 25                                 | 17                                 |
| 2     | (EtO) <sub>2</sub> PO <sub>2</sub> H (10) | 0                                  | 0                                  |
| 3     | (PhO) <sub>2</sub> PO <sub>2</sub> H (10) | 10                                 | 9                                  |
| 4     | CH <sub>3</sub> SO <sub>3</sub> H (10)    | 0                                  | 0                                  |
| 5     | PhCH <sub>2</sub> OH (10)                 | 42                                 | 10                                 |
| 6     | ethane-1,2-diol (5)                       | 33                                 | 16                                 |
| 7     | propane-1,3-diol (5)                      | 30                                 | 15                                 |
| 8     | butane-1,4-diol (5)                       | 37                                 | 13                                 |
| 9     | <b>pentane-1,5-diol (5)</b>               | <b>48</b>                          | <b>12</b>                          |
| 10    | hexane-1,6-diol (5)                       | 46                                 | 12                                 |
| 11    | heptane-1,7-diol (5)                      | 40                                 | 12                                 |
| 12    | octane-1,8-diol (5)                       | 46                                 | 9                                  |
| 13    | pentane-2,4-diol (5)                      | 30                                 | 22                                 |
| 14    | propane-1,2,3-triol (5)                   | 35                                 | 11                                 |
| 15    | 3-methoxypropan-1-ol (5)                  | 34                                 | 12                                 |

<sup>a</sup>Reaction conditions: **5** (0.2 mmol), **2** (0.2 mmol), RuHCl(CO)(PPh<sub>3</sub>)<sub>3</sub> (10 mol%), DCyPF (10 mol%), additive (5 mol% or 10 mol%), DME (2 mL), 85 °C, 6 h. <sup>b</sup>Determined by GC with dodecane as an internal standard.

**Table S8. The Effect of the Ratio of Substrates<sup>a</sup>**
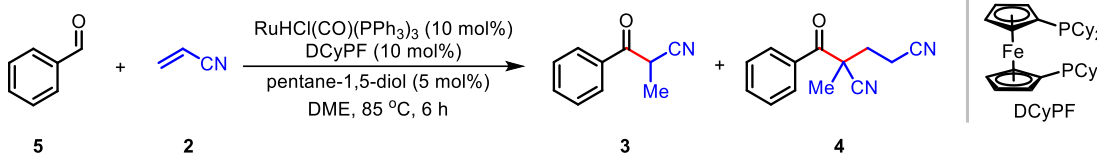

| Entry          | <b>5</b> (x equiv) | Yield of <b>3</b> (%) <sup>b</sup> | Yield of <b>4</b> (%) <sup>b</sup> |
|----------------|--------------------|------------------------------------|------------------------------------|
| 1              | 1.0                | 48                                 | 12                                 |
| 2              | 1.2                | 55                                 | 14                                 |
| <b>3</b>       | <b>1.5</b>         | <b>70 (66)<sup>c</sup></b>         | <b>0</b>                           |
| 4              | 2.0                | 71                                 | 0                                  |
| 5 <sup>d</sup> | 0.4                | 0                                  | 50 (47) <sup>c</sup>               |

<sup>a</sup>Reaction conditions: **5** (x equiv), **2** (0.2 mmol), RuHCl(CO)(PPh<sub>3</sub>)<sub>3</sub> (10 mol%), DCyPF (10 mol%), pentane-1,5-diol (5 mol%), DME (2 mL), 85 °C, 6 h, if otherwise noted. <sup>b</sup>Determined by GC with dodecane as an internal standard. <sup>c</sup>Isolated yield in the parenthesis. <sup>d</sup>With **1** (0.2 mmol), **2** (0.5 mmol), 12 h.

**Table S9. The Effect of Solvent<sup>a</sup>**
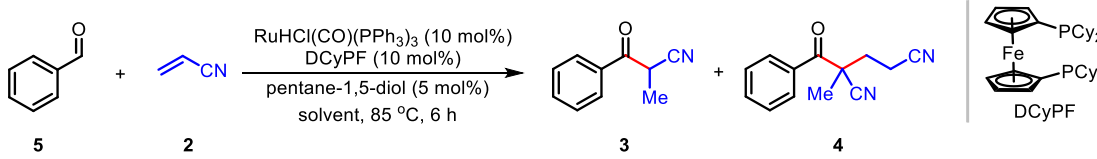

| Entry          | Solvent                           | Yield of <b>3</b> (%) <sup>b</sup> | Yield of <b>4</b> (%) <sup>b</sup> |
|----------------|-----------------------------------|------------------------------------|------------------------------------|
| <b>1</b>       | <b>DME</b>                        | <b>70</b>                          | <b>0</b>                           |
| 2              | CH <sub>3</sub> OH                | trace                              | trace                              |
| 3              | CH <sub>3</sub> O <sup>t</sup> Bu | 61                                 | 0                                  |
| 4              | DCE                               | 26                                 | 6                                  |
| 5              | benzene                           | 53                                 | 18                                 |
| 6              | CH <sub>3</sub> CN                | trace                              | trace                              |
| 7 <sup>c</sup> | toluene                           | 51                                 | 6                                  |
| 8 <sup>c</sup> | NMP                               | 38                                 | 0                                  |
| 9 <sup>c</sup> | DMF                               | 16                                 | 11                                 |
| 10             | THF                               | 57                                 | 3                                  |
| 11             | 1,4-dioxane                       | 64                                 | 3                                  |

<sup>a</sup>Reaction conditions: **5** (0.3 mmol), **2** (0.2 mmol), RuHCl(CO)(PPh<sub>3</sub>)<sub>3</sub> (10 mol%), DCyPF (10 mol%), pentane-1,5-diol (5 mol%), solvent (2 mL), 85 °C, 6 h, if otherwise noted. <sup>b</sup>Determined by GC with dodecane as an internal standard. <sup>c</sup>At 110 °C.

**Table S10. The Effect of Ru Catalyst and Control Experiments<sup>a</sup>**

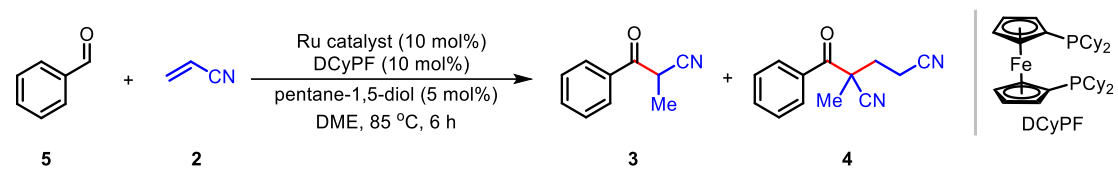

| Entry          | Ru catalyst                                           | Yield of <b>3</b> (%) <sup>b</sup> | Yield of <b>4</b> (%) <sup>b</sup> |
|----------------|-------------------------------------------------------|------------------------------------|------------------------------------|
| <b>1</b>       | <b>RuHCl(CO)(PPh<sub>3</sub>)<sub>3</sub></b>         | <b>70</b>                          | <b>0</b>                           |
| 2              | RuH <sub>2</sub> (CO)(PPh <sub>3</sub> ) <sub>3</sub> | 22                                 | 13                                 |
| 3              | RuCl <sub>2</sub> (PPh <sub>3</sub> ) <sub>3</sub>    | 0                                  | 0                                  |
| 4              | (RuCpCO) <sub>2</sub>                                 | 0                                  | 0                                  |
| 5              | Ru <sub>3</sub> (CO) <sub>12</sub>                    | 0                                  | 0                                  |
| 6              | RuCl <sub>2</sub> (COD)                               | 0                                  | 0                                  |
| 7              | RuHCl(CO)(PPh <sub>3</sub> ) <sub>3</sub> (15 mol%)   | 70                                 | 0                                  |
| 8              | RuHCl(CO)(PPh <sub>3</sub> ) <sub>3</sub> (5 mol%)    | 60                                 | 9                                  |
| 9 <sup>c</sup> | -                                                     | 0                                  | 0                                  |

<sup>a</sup>Reaction conditions: **5** (0.3 mmol), **2** (0.2 mmol), Ru catalyst (10 mol%), DME (2 mL), 85 °C, 6 h, if otherwise noted. <sup>b</sup>Determined by GC with dodecane as an internal standard. <sup>c</sup>Without Ru catalyst.

## IV General Procedure and Characterization Data

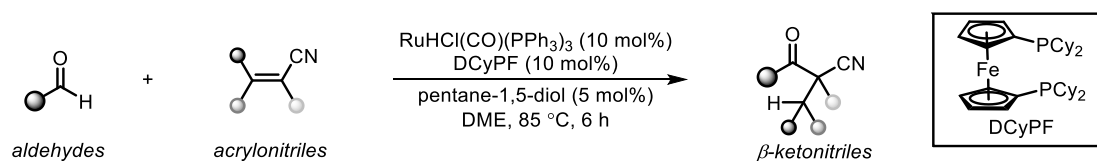

### General Procedure A for Hydroacylation of Acrylonitriles with Aldehydes to $\beta$ -Ketonitriles:

In a nitrogen-filled glovebox, a 25 mL Schlenk tube was charged with  $\text{RuHCl(CO)(PPh}_3)_3$  (0.02 mmol, 19.2 mg), DCyPF (0.02 mmol, 11.4 mg), pentane-1,5-diol (0.01 mmol, 1 mg). Then, dry 1,2-dimethoxyethane (DME, 2 mL) was added, followed by aldehyde (0.3 mmol) and acrylonitrile (0.2 mmol). Then the Schlenk tube was removed from glovebox. The tube was stirred at 85 °C for 6 h under  $\text{N}_2$  atmosphere. The reaction mixture was concentrated under reduced pressure, which was purified by flash column chromatography on silica gel (PE:EA) to give to afford the desired product.

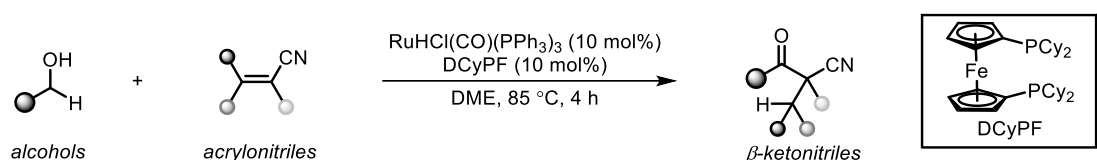

### General Procedure B for Hydroacylation of Acrylonitriles with Alcohols to $\beta$ -Ketonitriles:

In a nitrogen-filled glovebox, a 25 mL Schlenk tube was charged with  $\text{RuHCl(CO)(PPh}_3)_3$  (0.02 mmol, 19.2 mg), DCyPF (0.02 mmol, 11.4 mg). Then, dry 1,2-dimethoxyethane (DME, 2 mL) was added, followed by alcohol (0.2 mmol) and acrylonitriles (0.4 mmol). Then the Schlenk tube was removed from glovebox. The tube was stirred at 85 °C for 4 h under  $\text{N}_2$  atmosphere. The reaction mixture was concentrated under reduced pressure, which was purified by flash column chromatography on silica gel (PE:EA) to give to afford the desired product.

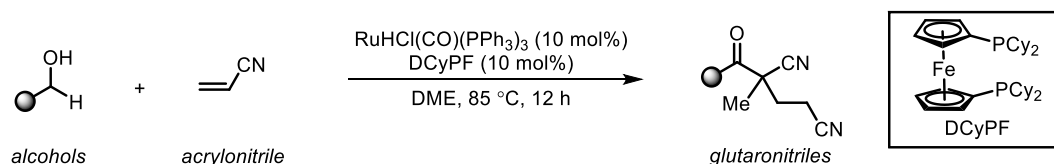

### General Procedure C for Cross-Coupling of Acrylonitrile with Alcohols to Glutaronitriles:

In a nitrogen-filled glovebox, a 25 mL Schlenk tube was charged with  $\text{RuHCl(CO)(PPh}_3)_3$  (0.02 mmol, 19.2 mg) and DCyPF (0.02 mmol, 11.4 mg). Then, dry 1,2-dimethoxyethane (DME, 2 mL) was added, followed by alcohol (0.2 mmol) and acrylonitrile (1.0 mmol). Then the Schlenk tube was removed from glovebox. The tube was stirred at 85 °C for 12 h under  $\text{N}_2$  atmosphere. The reaction mixture was concentrated under reduced pressure, which was purified by flash column chromatography on silica gel (PE:EA) to give to afford the desired product.

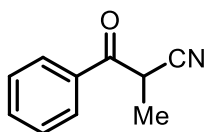

**2-Methyl-3-oxo-3-phenylpropanenitrile (3).** Synthesized according to the **General Procedure A** with benzaldehyde (0.3 mmol, 31.8 mg) and acrylonitrile (0.2 mmol, 10.6 mg) at 85 °C for 6 h. Purified by flash column chromatography on silica gel (PE:EA = 10:1) to give **3** as a colorless oil (21.4 mg, 67%

yield).

$^1\text{H}$  NMR (400 MHz,  $\text{CDCl}_3$ )  $\delta$  7.99 (d,  $J$  = 8.0 Hz, 2H), 7.66 (dd,  $J$  = 7.6, 7.2 Hz, 1H), 7.53 (dd,  $J$  = 7.6, 7.6 Hz, 2H), 4.38 (q,  $J$  = 7.2 Hz, 1H), 1.65 (d,  $J$  = 7.2 Hz, 3H). The data are consistent with the reported literature.<sup>2</sup>

Synthesized according to the **General Procedure B** with benzalcohol (0.2 mmol, 21.6 mg,) and acrylonitrile (0.4 mmol, 21.2 mg) at 85 °C for 4 h. Purified by flash column chromatography on silica gel (PE:EA = 10:1) to give **3** as a colorless oil (21.0 mg, 66% yield).

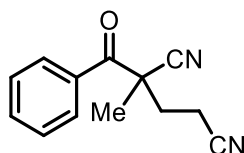

**2-Benzoyl-2-methylpentanedinitrile (4).** Synthesized according to the **General Procedure C** with benzalcohol (0.2 mmol, 21.6 mg) and acrylonitrile (1.0 mmol, 53.0 mg) at 85 °C for 12 h. Purified by flash column chromatography on silica gel (PE:EA = 10:1) to give **4** as a yellow oil (26.3 mg, 62% yield).

$^1\text{H}$  NMR (400 MHz,  $\text{CDCl}_3$ )  $\delta$  8.15 (d,  $J$  = 7.6 Hz, 2H), 7.66 (dd,  $J$  = 7.6, 7.6 Hz, 1H), 7.53 (dd,  $J$  = 7.6, 7.2 Hz, 2H), 2.70 – 2.51 (m, 3H), 2.21 – 2.14 (m, 1H), 1.79 (s, 3H).

$^{13}\text{C}$  NMR (100 MHz,  $\text{CDCl}_3$ )  $\delta$  192.5, 134.6 133.4, 129.5, 129.1, 120.4, 118.1, 45.1, 33.6, 24.8, 13.9.

HRMS (ESI): Calcd for  $[\text{C}_{13}\text{H}_{12}\text{N}_2\text{ONa}]^+ [\text{M}+\text{Na}]^+$  235.0842, Found 235.0850.

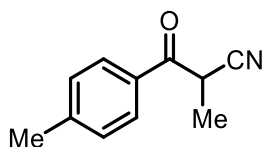

**2-Methyl-3-oxo-3-(*p*-tolyl)propanenitrile (6).** Synthesized according to the **General Procedure A** with 4-methylbenzaldehyde (0.3 mmol, 36.0 mg) and acrylonitrile (0.2 mmol, 10.6 mg) at 85 °C for 6 h. Purified by flash column chromatography on silica gel (PE:EA = 10:1) to give **6** as a colorless oil (21.2 mg, 61% yield).

$^1\text{H}$  NMR (400 MHz,  $\text{CDCl}_3$ )  $\delta$  7.89 (d,  $J$  = 8.0 Hz, 2H), 7.32 (d,  $J$  = 8.0 Hz, 2H), 4.35 (q,  $J$  = 7.2 Hz, 1H), 2.44 (s, 3H), 1.64 (d,  $J$  = 7.2 Hz, 3H).

$^{13}\text{C}$  NMR (100 MHz,  $\text{CDCl}_3$ )  $\delta$  190.4, 145.9, 131.4, 129.9, 129.1, 118.4, 33.7, 21.9, 15.1.

HRMS (ESI): Calcd for  $[\text{C}_{11}\text{H}_{11}\text{NO}_2\text{Na}]^+ [\text{M}+\text{Na}]^+$  196.0733, Found 196.0743.

Synthesized according to the **General Procedure B** with *p*-tolylmethanol (0.2 mmol, 24.4 mg,) and acrylonitrile (0.4 mmol, 21.2 mg) at 85 °C for 4 h. Purified by flash column chromatography on silica gel (PE:EA = 10:1) to give **5** as a colorless oil (18.7 mg, 54% yield).

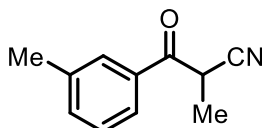

**2-Methyl-3-oxo-3-(*m*-tolyl)propanenitrile (7).** Synthesized according to the **General Procedure A** with 3-methylbenzaldehyde (0.3 mmol, 36.0 mg) and acrylonitrile (0.2 mmol, 10.6 mg) at 85 °C for 6 h. Purified by flash column chromatography on silica gel (PE:EA = 10:1) to give **7** as a colorless oil (18.3 mg, 53% yield).

$^1\text{H}$  NMR (400 MHz,  $\text{CDCl}_3$ )  $\delta$  7.79 – 7.76 (m, 2H), 7.46 (d,  $J$  = 7.6 Hz, 1H), 7.41 (dd,  $J$  = 7.6, 7.2 Hz, 1H), 4.36 (q,  $J$  = 7.2 Hz, 1H), 2.44 (s, 3H), 1.64 (d,  $J$  = 7.2 Hz, 3H).  
 $^{13}\text{C}$  NMR (100 MHz,  $\text{CDCl}_3$ )  $\delta$  191.1, 139.3, 135.5, 134.0, 129.4, 129.1, 126.1, 118.3, 33.8, 21.5, 15.2.  
 HRMS (ESI): Calcd for  $[\text{C}_{11}\text{H}_{11}\text{NO}_2\text{Na}]^+ [\text{M}+\text{Na}]^+$  196.0733, Found 196.0736.

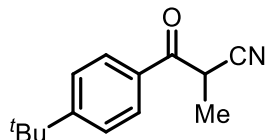

**3-(4-(*tert*-Butyl)phenyl)-2-methyl-3-oxopropanenitrile (8).** Synthesized according to the **General Procedure A** with 4-(*tert*-butyl)benzaldehyde (0.3 mmol, 48.6 mg) and acrylonitrile (0.2 mmol, 10.6 mg) at 85 °C for 6 h. Purified by flash column chromatography on silica gel (PE:EA = 10:1) to give **8** as a colorless oil (25.0 mg, 58% yield).

$^1\text{H}$  NMR (400 MHz,  $\text{CDCl}_3$ )  $\delta$  7.93 (d,  $J$  = 8.0 Hz, 2H), 7.53 (d,  $J$  = 8.4 Hz, 2H), 4.36 (q,  $J$  = 7.2 Hz, 1H), 1.64 (d,  $J$  = 7.2 Hz, 3H), 1.35 (s, 9H).  
 $^{13}\text{C}$  NMR (100 MHz,  $\text{CDCl}_3$ )  $\delta$  190.4, 158.7, 131.3, 128.9, 126.2, 118.5, 35.4, 33.7, 31.1, 15.1.  
 HRMS (ESI): Calcd for  $[\text{C}_{14}\text{H}_{17}\text{NONa}]^+ [\text{M}+\text{Na}]^+$  238.1202, Found 238.1203.

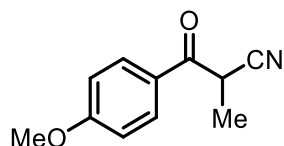

**3-(4-Methoxyphenyl)-2-methyl-3-oxopropanenitrile (9).** Synthesized according to the **General Procedure A** with 4-methoxybenzaldehyde (0.3 mmol, 40.8 mg) and acrylonitrile (0.2 mmol, 10.6 mg) at 85 °C for 6 h. Purified by flash column chromatography on silica gel (PE:EA = 5:1) to give **9** as a colorless oil (22.0 mg, 58% yield).

$^1\text{H}$  NMR (400 MHz,  $\text{CDCl}_3$ )  $\delta$  7.97 (d,  $J$  = 8.8 Hz, 2H), 6.99 (d,  $J$  = 8.8 Hz, 2H), 4.31 (q,  $J$  = 7.2 Hz, 1H), 3.90 (s, 3H), 1.63 (d,  $J$  = 7.2 Hz, 3H).  
 $^{13}\text{C}$  NMR (100 MHz,  $\text{CDCl}_3$ )  $\delta$  189.2, 164.8, 131.4, 126.8, 118.6, 114.5, 55.8, 33.4, 15.2.  
 HRMS (ESI): Calcd for  $[\text{C}_{11}\text{H}_{12}\text{NO}_2]^+ [\text{M}+\text{H}]^+$  190.0863, Found 190.0861.

Synthesized according to the **General Procedure B** with (4-methoxyphenyl)methanol (0.2 mmol, 27.6 mg) and acrylonitrile (0.4 mmol, 21.2 mg) at 85 °C for 4 h. Purified by flash column chromatography on silica gel (PE:EA = 10:1) to give **9** as a colorless oil (23.4 mg, 62% yield).

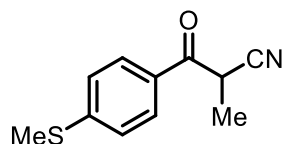

**2-Methyl-3-(4-(methylthio)phenyl)-3-oxopropanenitrile (10).** Synthesized according to the **General Procedure A** with 4-(methylthio)benzaldehyde (0.3 mmol, 45.6 mg) and acrylonitrile (0.2 mmol, 10.6 mg) at 85 °C for 6 h. Purified by flash column chromatography on silica gel (PE:EA = 5:1) to give **10** as a colorless oil (23.0 mg, 56% yield).

$^1\text{H}$  NMR (400 MHz,  $\text{CDCl}_3$ )  $\delta$  7.88 (d,  $J$  = 8.0 Hz, 2H), 7.30 (d,  $J$  = 8.0 Hz, 2H), 4.31 (q,  $J$  = 7.2 Hz, 1H), 2.53 (s, 3H), 1.63 (d,  $J$  = 7.2 Hz, 3H).

$^{13}\text{C}$  NMR (100 MHz,  $\text{CDCl}_3$ )  $\delta$  189.7, 148.5, 129.9, 129.2, 125.3, 118.4, 33.5, 15.1, 14.7.

HRMS (ESI): Calcd for  $[\text{C}_{11}\text{H}_{11}\text{NOSNa}]^+ [\text{M}+\text{Na}]^+$  228.0454, Found 228.0444.

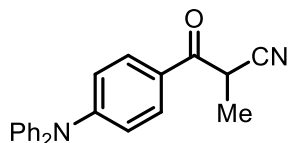

**3-(4-(Diphenylamino)phenyl)-2-methyl-3-oxopropanenitrile (11).** Synthesized according to the **General Procedure A** with 4-(diphenylamino)benzaldehyde (0.3 mmol, 81.9 mg) and acrylonitrile (0.2 mmol, 10.6 mg) at 85 °C for 6 h. Purified by flash column chromatography on silica gel (PE:EA = 6:1) to give **11** as a yellow oil (40.4 mg, 62% yield).

$^1\text{H}$  NMR (400 MHz,  $\text{CDCl}_3$ )  $\delta$  7.81 (d,  $J$  = 8.0 Hz, 2H), 7.37 – 7.34 (m, 4H), 7.20 – 7.17 (m, 6H), 6.97 (d,  $J$  = 8.0 Hz, 2H), 4.27 (q,  $J$  = 7.2 Hz, 1H), 1.62 (d,  $J$  = 6.8 Hz, 3H).

$^{13}\text{C}$  NMR (100 MHz,  $\text{CDCl}_3$ )  $\delta$  188.5, 153.4, 146.0, 130.7, 129.9, 126.6, 125.5, 125.5, 118.9, 118.8, 33.1, 15.2.

HRMS (ESI): Calcd for  $[\text{C}_{22}\text{H}_{18}\text{N}_2\text{ONa}]^+ [\text{M}+\text{Na}]^+$  349.1311, Found 349.1319.

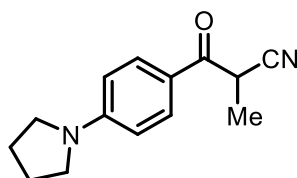

**2-Methyl-3-oxo-3-(4-(pyrrolidin-1-yl)phenyl)propanenitrile (12).** Synthesized according to the **General Procedure A** with 4-(pyrrolidin-1-yl)benzaldehyde (0.3 mmol, 52.5 mg) and acrylonitrile (0.2 mmol, 10.6 mg) at 85 °C for 6 h. Purified by flash column chromatography on silica gel (PE:EA = 5:1) to give **12** as a white jelly (34.0 mg, 74% yield).

$^1\text{H}$  NMR (400 MHz,  $\text{CDCl}_3$ )  $\delta$  7.86 (d,  $J$  = 8.4 Hz, 2H), 6.53 (d,  $J$  = 8.4 Hz, 2H), 4.29 (q,  $J$  = 7.2 Hz, 1H), 3.39 (s, 4H), 2.05 (s, 4H), 1.61 (d,  $J$  = 7.2 Hz, 3H).

$^{13}\text{C}$  NMR (100 MHz,  $\text{CDCl}_3$ )  $\delta$  188.1, 151.9, 131.4, 120.9, 119.4, 111.2, 47.8, 32.8, 25.5, 15.5.

HRMS (ESI): Calcd for  $[\text{C}_{14}\text{H}_{17}\text{N}_2\text{O}]^+ [\text{M}+\text{H}]^+$  229.1335, Found 229.1330.

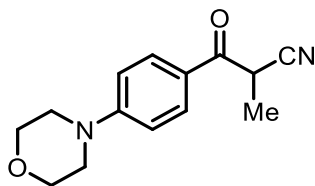

**2-Methyl-3-(4-morpholinophenyl)-3-oxopropanenitrile (13).** Synthesized according to the **General Procedure A** with 4-morpholinobenzaldehyde (0.3 mmol, 57.3 mg) and acrylonitrile (0.2 mmol, 10.6 mg) at 85 °C for 6 h. Purified by flash column chromatography on silica gel (PE:EA = 5:1) to give **13** as a white jelly (30.7 mg, 63% yield).

$^1\text{H}$  NMR (400 MHz,  $\text{CDCl}_3$ )  $\delta$  7.88 (d,  $J$  = 9.2 Hz, 2H), 6.86 (d,  $J$  = 9.2 Hz, 2H), 4.30 (q,  $J$  = 7.2 Hz, 1H), 3.83 (t,  $J$  = 4.8 Hz, 4H), 3.34 (t,  $J$  = 5.2 Hz, 4H), 1.59 (d,  $J$  = 7.2 Hz, 3H).

$^{13}\text{C}$  NMR (100 MHz,  $\text{CDCl}_3$ )  $\delta$  188.6, 155.0, 131.1, 123.8, 118.9, 113.2, 66.5, 47.1, 33.1, 15.3.

HRMS (ESI): Calcd for  $[\text{C}_{14}\text{H}_{16}\text{N}_2\text{O}_2\text{Na}]^+ [\text{M}+\text{Na}]^+$  267.1104, Found 267.1104.

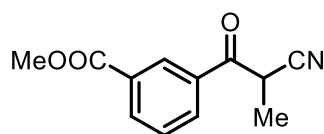

**Methyl 3-(2-cyanopropanoyl)benzoate (14).** Synthesized according to the **General Procedure A** with methyl 3-formylbenzoate (0.3 mmol, 49.2 mg) and acrylonitrile (0.2 mmol, 10.6 mg) at 85 °C for 6 h. Purified by flash column chromatography on silica gel (PE:EA = 6:1) to give **14** as a colorless oil (25.2 mg, 58% yield).

$^1\text{H}$  NMR (400 MHz,  $\text{CDCl}_3$ )  $\delta$  8.59 (s, 1H), 8.30 (d,  $J$  = 7.6 Hz, 1H), 8.18 (d,  $J$  = 7.6 Hz, 1H), 7.62 (dd,  $J$  = 8.0, 7.6 Hz, 1H), 4.44 (q,  $J$  = 7.2 Hz, 1H), 3.95 (s, 3H), 1.65 (d,  $J$  = 7.2 Hz, 3H).

$^{13}\text{C}$  NMR (100 MHz,  $\text{CDCl}_3$ )  $\delta$  190.3, 165.8, 135.3, 134.1, 133.0, 131.3, 129.8, 129.6, 117.9, 52.7, 34.0, 15.0.

HRMS (ESI): Calcd for  $[\text{C}_{12}\text{H}_{11}\text{NO}_3\text{Na}]^+ [\text{M}+\text{Na}]^+$  240.0631, Found 240.0625.

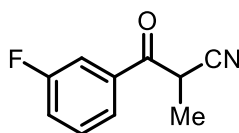

**3-(3-Fluorophenyl)-2-methyl-3-oxopropanenitrile (15).** Synthesized according to the **General Procedure A** with 3-fluorobenzaldehyde (0.3 mmol, 37.2 mg) and acrylonitrile (0.2 mmol, 10.6 mg) at 85 °C for 6 h. Purified by flash column chromatography on silica gel (PE:EA = 10:1) to give **15** as a colorless oil (19.1 mg, 54% yield).

$^1\text{H}$  NMR (400 MHz,  $\text{CDCl}_3$ )  $\delta$  7.78 (d,  $J$  = 8.0 Hz, 1H), 7.67 (d,  $J$  = 8.8 Hz, 1H), 7.55 – 7.50 (m, 1H), 7.39 – 7.34 (m, 1H), 4.32 (q,  $J$  = 7.2 Hz, 1H), 1.65 (d,  $J$  = 7.2 Hz, 3H).

$^{13}\text{C}$  NMR (100 MHz,  $\text{CDCl}_3$ )  $\delta$  189.8, 163.1 (d,  $J$  = 248.4 Hz), 135.9 (d,  $J$  = 6.5 Hz), 131.0 (d,  $J$  = 7.5 Hz), 124.7 (d,  $J$  = 3.4 Hz), 121.8 (d,  $J$  = 21.1 Hz), 117.9, 115.8 (d,  $J$  = 22.5 Hz), 34.0, 15.0.

$^{19}\text{F}$  NMR (376 MHz,  $\text{CDCl}_3$ )  $\delta$  -110.4.

HRMS (ESI): Calcd for  $[\text{C}_{10}\text{H}_8\text{NOFNa}]^+ [\text{M}+\text{Na}]^+$  200.0482, Found 200.0490.

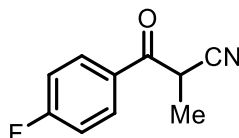

**3-(4-Fluorophenyl)-2-methyl-3-oxopropanenitrile (16).** Synthesized according to the **General Procedure A** with 4-fluorobenzaldehyde (0.3 mmol, 37.2 mg) and acrylonitrile (0.2 mmol, 10.6 mg) at 85 °C for 6 h. Purified by flash column chromatography on silica gel (PE:EA = 10:1) to give **16** as a colorless oil (24.0 mg, 68% yield).

$^1\text{H}$  NMR (400 MHz,  $\text{CDCl}_3$ )  $\delta$  8.03 (dd,  $J$  = 8.0, 6.0 Hz, 2H), 7.20 (dd,  $J$  = 8.4, 8.4 Hz, 2H), 4.33 (q,  $J$  = 7.2 Hz, 1H), 1.64 (d,  $J$  = 7.2 Hz, 3H).

$^{13}\text{C}$  NMR (100 MHz,  $\text{CDCl}_3$ )  $\delta$  189.3, 166.6 (d,  $J$  = 256.3 Hz), 131.7 (d,  $J$  = 9.8 Hz), 130.3 (d,  $J$  = 3.2 Hz), 118.13, 116.5 (d,  $J$  = 21.9 Hz), 33.8, 15.0.

$^{19}\text{F}$  NMR (376 MHz,  $\text{CDCl}_3$ )  $\delta$  -102.0.

HRMS (ESI): Calcd for  $[\text{C}_{10}\text{H}_8\text{NOFNa}]^+ [\text{M}+\text{Na}]^+$  200.0482, Found 200.0492.

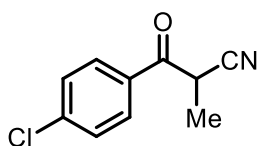

**3-(4-Chlorophenyl)-2-methyl-3-oxopropanenitrile (17).** Synthesized according to the **General Procedure A** with 4-chlorobenzaldehyde (0.3 mmol, 42.0 mg) and acrylonitrile (0.2 mmol, 10.6 mg) at 85 °C for 6 h. Purified by flash column chromatography on silica gel (PE:EA = 10:1) to give **17** as a colorless oil (20.6 mg, 53% yield).

$^1\text{H}$  NMR (400 MHz,  $\text{CDCl}_3$ )  $\delta$  7.94 (d,  $J$  = 8.0 Hz, 2H), 7.51 (d,  $J$  = 8.4 Hz, 2H), 4.30 (q,  $J$  = 7.2 Hz, 1H), 1.65 (d,  $J$  = 7.2 Hz, 3H).

$^{13}\text{C}$  NMR (100 MHz,  $\text{CDCl}_3$ )  $\delta$  189.6, 141.4, 132.2, 130.3, 129.7, 118.0, 33.8, 14.9.

HRMS (ESI): Calcd for  $[\text{C}_{10}\text{H}_8\text{NOCINa}]^+$   $[\text{M}+\text{Na}]^+$  216.0187, Found 216.0187.

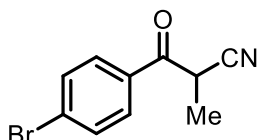

**3-(4-Bromophenyl)-2-methyl-3-oxopropanenitrile (18).** Synthesized according to the **General Procedure A** with 4-bromobenzaldehyde (0.3 mmol, 55.2 mg) and acrylonitrile (0.2 mmol, 10.6 mg) at 85 °C for 6 h. Purified by flash column chromatography on silica gel (PE:EA = 10:1) to give **18** as a colorless oil (19.4 mg, 41% yield).

$^1\text{H}$  NMR (400 MHz,  $\text{CDCl}_3$ )  $\delta$  7.86 (d,  $J$  = 8.4 Hz, 2H), 7.68 (d,  $J$  = 8.4 Hz, 2H), 4.30 (q,  $J$  = 7.2 Hz, 1H), 1.64 (d,  $J$  = 7.2 Hz, 3H).

$^{13}\text{C}$  NMR (100 MHz,  $\text{CDCl}_3$ )  $\delta$  189.9, 132.7, 132.6, 130.3, 130.2, 118.0, 33.8, 14.9.

HRMS (ESI): Calcd for  $[\text{C}_{10}\text{H}_8\text{NOBrNa}]^+$   $[\text{M}+\text{Na}]^+$  259.9681, Found 259.9779.

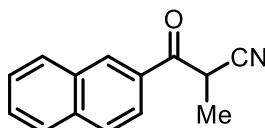

**2-Methyl-3-(naphthalen-2-yl)-3-oxopropanenitrile (19).** Synthesized according to the **General Procedure A** with 2-naphthaldehyde (0.3 mmol, 46.8 mg) and acrylonitrile (0.2 mmol, 10.6 mg) at 85 °C for 6 h. Purified by flash column chromatography on silica gel (PE:EA = 10:1) to give **19** as a white jelly (31.4 mg, 75% yield).

$^1\text{H}$  NMR (400 MHz,  $\text{CDCl}_3$ )  $\delta$  8.51 (s, 1H), 8.00 (dd,  $J$  = 8.0, 7.6 Hz, 2H), 7.94 (d,  $J$  = 8.8 Hz, 1H), 7.90 (d,  $J$  = 8.4 Hz, 1H), 7.66 (dd,  $J$  = 7.6, 7.2 Hz, 1H), 7.60 (dd,  $J$  = 8.0, 6.8 Hz, 1H), 4.54 (q,  $J$  = 7.2 Hz, 1H), 1.71 (d,  $J$  = 7.2 Hz, 3H).

$^{13}\text{C}$  NMR (100 MHz,  $\text{CDCl}_3$ )  $\delta$  190.8, 136.2, 132.5, 131.2, 131.1, 129.9, 129.5, 129.3, 128.0, 127.4, 124.0, 118.4, 33.9, 15.3.

HRMS (ESI): Calcd for  $[\text{C}_{14}\text{H}_{12}\text{NO}]^+$   $[\text{M}+\text{H}]^+$  210.0913, Found 210.0913.

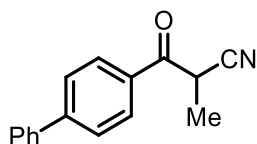

**3-([1,1'-Biphenyl]-4-yl)-2-methyl-3-oxopropanenitrile (20).** Synthesized according to the **General Procedure A** with [1,1'-biphenyl]-4-carbaldehyde (0.3 mmol, 54.6 mg) and acrylonitrile (0.2 mmol, 10.6 mg) at 85 °C for 6 h. Purified by flash column chromatography on silica gel (PE:EA = 10:1) to give **20** as a white jelly (41.0 mg, 87% yield).

$^1\text{H}$  NMR (400 MHz,  $\text{CDCl}_3$ )  $\delta$  8.07 (d,  $J$  = 8.4 Hz, 2H), 7.74 (d,  $J$  = 8.0 Hz, 2H), 7.64 (d,  $J$  = 7.6 Hz, 2H), 7.46 (dd,  $J$  = 7.6, 7.2 Hz, 2H), 7.43 (d,  $J$  = 7.2 Hz, 1H), 4.40 (q,  $J$  = 7.2 Hz, 1H), 1.68 (d,  $J$  = 7.2 Hz, 3H).

$^{13}\text{C}$  NMR (100 MHz,  $\text{CDCl}_3$ )  $\delta$  190.4, 147.4, 139.4, 132.4, 129.6, 129.2, 128.8, 127.8, 127.4, 118.4, 33.8, 15.1.

HRMS (ESI): Calcd for  $[\text{C}_{16}\text{H}_{13}\text{NONa}]^+ [\text{M}+\text{Na}]^+$  258.0889, Found 258.0893.

Synthesized according to the **General Procedure B** with [1,1'-biphenyl]-4-ylmethanol (0.2 mmol, 36.8 mg,) and acrylonitrile (0.4 mmol, 21.2 mg) at 85 °C for 4 h. Purified by flash column chromatography on silica gel (PE:EA = 10:1) to give **20** as a colorless oil (24.0 mg, 51% yield).

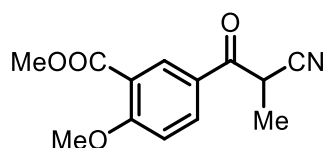

**Methyl 5-(2-cyanopropanoyl)-2-methoxybenzoate (21).** Synthesized according to the **General Procedure A** with methyl 5-formyl-2-methoxybenzoate (0.3 mmol, 58.2 mg) and acrylonitrile (0.2 mmol, 10.6 mg) at 85 °C for 6 h. Purified by flash column chromatography on silica gel (PE:EA = 6:1) to give **21** as a colorless oil (29.6 mg, 60% yield).

$^1\text{H}$  NMR (400 MHz,  $\text{CDCl}_3$ )  $\delta$  8.41 (d,  $J$  = 2.0 Hz, 1H), 8.13 (dd,  $J$  = 8.8, 2.0 Hz, 1H), 7.08 (d,  $J$  = 8.8 Hz, 1H), 4.36 (q,  $J$  = 7.2 Hz, 1H), 3.99 (s, 3H), 3.91 (s, 3H), 1.62 (d,  $J$  = 7.2 Hz, 3H).

$^{13}\text{C}$  NMR (100 MHz,  $\text{CDCl}_3$ )  $\delta$  188.8, 165.5, 163.7, 134.6, 133.1, 126.0, 120.6, 118.2, 112.5, 56.6, 52.6, 33.5, 15.1.

HRMS (ESI): Calcd for  $[\text{C}_{13}\text{H}_{13}\text{NO}_4\text{Na}]^+ [\text{M}+\text{Na}]^+$  270.0737, Found 270.0746.

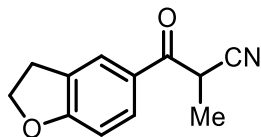

**3-(2,3-Dihydrobenzofuran-5-yl)-2-methyl-3-oxopropanenitrile (22).** Synthesized according to the **General Procedure A** with 2,3-dihydrobenzofuran-5-carbaldehyde (0.3 mmol, 44.4 mg) and acrylonitrile (0.2 mmol, 10.6 mg) at 85 °C for 6 h. Purified by flash column chromatography on silica gel (PE:EA = 5:1) to give **22** as a colorless oil (18.8 mg, 47% yield).

$^1\text{H}$  NMR (400 MHz,  $\text{CDCl}_3$ )  $\delta$  7.87 (s, 1H), 7.82 (d,  $J$  = 8.4 Hz, 1H), 6.84 (d,  $J$  = 8.4 Hz, 1H), 4.69 (t,  $J$  = 8.8 Hz, 2H), 4.30 (q,  $J$  = 7.2 Hz, 1H), 3.27 (t,  $J$  = 8.8 Hz, 2H), 1.62 (d,  $J$  = 7.2 Hz, 3H).

$^{13}\text{C}$  NMR (100 MHz,  $\text{CDCl}_3$ )  $\delta$  189.0, 165.8, 131.2, 128.7, 127.1, 126.3, 118.7, 109.7, 72.7, 33.4, 29.0, 15.3.

HRMS (ESI): Calcd for  $[C_{12}H_{12}NO_2]^+ [M+H]^+$  202.0863, Found 202.0865.

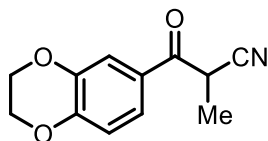

**3-(2,3-Dihydrobenzo[b][1,4]dioxin-6-yl)-2-methyl-3-oxopropanenitrile (23).** Synthesized according to the **General Procedure A** with 2,3-dihydrobenzo[b][1,4]dioxine-6-carbaldehyde (0.3 mmol, 49.2 mg) and acrylonitrile (0.2 mmol, 10.6 mg) at 85 °C for 6 h. Purified by flash column chromatography on silica gel (PE:EA = 5:1) to give **23** as a colorless oil (27.2 mg, 62% yield).

$^1H$  NMR (400 MHz,  $CDCl_3$ )  $\delta$  7.51 – 7.50 (m, 2H), 6.94 (d,  $J$  = 9.2 Hz, 1H), 4.37 – 4.24 (m, 5H), 1.61 (d,  $J$  = 7.2 Hz, 3H).

$^{13}C$  NMR (100 MHz,  $CDCl_3$ )  $\delta$  189.2, 149.4, 143.9, 127.5, 123.1, 118.5, 118.4, 117.9, 64.9, 64.2, 33.5, 15.3.

HRMS (ESI): Calcd for  $[C_{12}H_{11}NO_3Na]^+ [M+Na]^+$  240.0631, Found 240.0630.

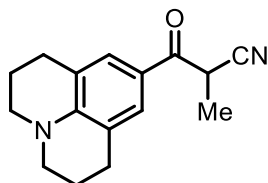

**2-Methyl-3-oxo-3-(2,3,6,7-tetrahydro-1H,5H-pyrido[3,2,1-ij]quinolin-9-yl)propanenitrile (24).** Synthesized according to the **General Procedure A** with 2,3,6,7-tetrahydro-1H,5H-pyrido[3,2,1-ij]quinoline-9-carbaldehyde (0.3 mmol, 60.3 mg) and acrylonitrile (0.2 mmol, 10.6 mg) at 85 °C for 6 h. Purified by flash column chromatography on silica gel (PE:EA = 5:1) to give **24** as a yellow oil (40.0 mg, 79% yield).

$^1H$  NMR (400 MHz,  $CDCl_3$ )  $\delta$  7.41 (s, 2H), 4.26 (q,  $J$  = 6.8 Hz, 1H), 3.28 (t,  $J$  = 5.6 Hz, 4H), 2.74 (t,  $J$  = 6.4 Hz, 4H), 2.06 – 1.85 (m, 4H), 1.58 (d,  $J$  = 7.2 Hz, 3H).

$^{13}C$  NMR (100 MHz,  $CDCl_3$ )  $\delta$  188.0, 147.9, 128.7, 120.3, 120.1, 119.5, 50.1, 32.5, 27.8, 21.3, 15.7.

HRMS (ESI): Calcd for  $[C_{16}H_{19}N_2O]^+ [M+H]^+$  255.1492, Found 255.1485.

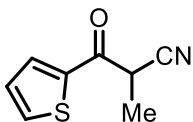

**2-Methyl-3-oxo-3-(thiophen-2-yl)propanenitrile (25).** Synthesized according to the **General Procedure A** with thiophene-2-carbaldehyde (0.3 mmol, 33.6 mg) and acrylonitrile (0.2 mmol, 10.6 mg) at 85 °C for 6 h. Purified by flash column chromatography on silica gel (PE:EA = 10:1) to give **25** as a pale yellow oil (24.7 mg, 75% yield).

$^1H$  NMR (400 MHz,  $CDCl_3$ )  $\delta$  7.89 (d,  $J$  = 3.2 Hz, 1H), 7.78 (d,  $J$  = 4.4 Hz, 1H), 7.20 (dd,  $J$  = 4.0, 3.6 Hz, 1H), 4.22 (q,  $J$  = 7.2 Hz, 1H), 1.66 (d,  $J$  = 7.2 Hz, 3H).

$^{13}C$  NMR (100 MHz,  $CDCl_3$ )  $\delta$  183.6, 140.6, 136.2, 133.8, 128.8, 118.2, 34.8, 15.4.

HRMS (ESI): Calcd for  $[C_8H_7NOSNa]^+ [M+Na]^+$  188.0141, Found 188.0146.

Synthesized according to the **General Procedure B** with thiophen-2-ylmethanol (0.2 mmol, 22.8 mg,)

and acrylonitrile (0.4 mmol, 21.2 mg) at 85 °C for 4 h. Purified by flash column chromatography on silica gel (PE:EA = 10:1) to give **25** as a colorless oil (15.8 mg, 48% yield).

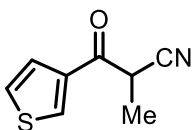

**2-Methyl-3-oxo-3-(thiophen-3-yl)propanenitrile (26).** Synthesized according to the **General Procedure A** with thiophene-3-carbaldehyde (0.3 mmol, 33.6 mg) and acrylonitrile (0.2 mmol, 10.6 mg) at 85 °C for 6 h. Purified by flash column chromatography on silica gel (PE:EA = 10:1) to give **26** as a pale yellow oil (26.0 mg, 79% yield).

<sup>1</sup>H NMR (400 MHz, CDCl<sub>3</sub>) δ 8.25 (s, 1H), 7.60 (d, *J* = 5.2 Hz, 1H), 7.44 – 7.34 (m, 1H), 4.17 (q, *J* = 7.2 Hz, 1H), 1.64 (d, *J* = 7.2 Hz, 3H).

<sup>13</sup>C NMR (100 MHz, CDCl<sub>3</sub>) δ 184.7, 138.7, 134.2, 127.4, 127.3, 118.4, 35.1, 15.1.

HRMS (ESI): Calcd for [C<sub>8</sub>H<sub>7</sub>NOSNa]<sup>+</sup> [M+Na]<sup>+</sup> 188.0141, Found 188.0132.

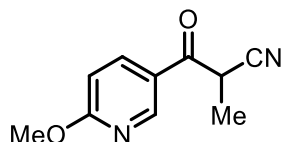

**3-(6-Methoxypyridin-3-yl)-2-methyl-3-oxopropanenitrile (27).** Synthesized according to the **General Procedure A** with 6-methoxynicotinaldehyde (0.3 mmol, 41.1 mg) and acrylonitrile (0.2 mmol, 10.6 mg) at 85 °C for 6 h. Purified by flash column chromatography on silica gel (PE:EA = 5:1) to give **27** as a pale yellow oil (31.5 mg, 83% yield).

<sup>1</sup>H NMR (400 MHz, CDCl<sub>3</sub>) δ 8.83 (s, 1H), 8.15 (d, *J* = 8.8 Hz, 1H), 6.84 (d, *J* = 8.8 Hz, 1H), 4.27 (q, *J* = 7.2 Hz, 1H), 4.02 (s, 3H), 1.64 (d, *J* = 7.2 Hz, 3H).

<sup>13</sup>C NMR (100 MHz, CDCl<sub>3</sub>) δ 188.5, 167.7, 150.0, 138.8, 123.8, 118.1, 112.0, 54.5, 33.7, 14.9.

HRMS (ESI): Calcd for [C<sub>10</sub>H<sub>11</sub>N<sub>2</sub>O<sub>2</sub>]<sup>+</sup> [M+H]<sup>+</sup> 191.0815, Found 191.0823.

Synthesized according to the **General Procedure B** with (6-methoxypyridin-3-yl)methanol (0.2 mmol, 27.8 mg) and acrylonitrile (0.4 mmol, 21.2 mg) at 85 °C for 4 h. Purified by flash column chromatography on silica gel (PE:EA = 10:1) to give **27** as a colorless oil (14.1 mg, 37% yield).

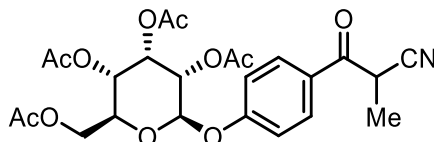

**(2S,3S,4S,5S,6R)-2-(Acetoxymethyl)-6-(4-(2-cyanopropanoyl)phenoxy)tetrahydro-2H-pyran-3,4,5-triyl triacetate (28).** Synthesized according to the **General Procedure A** with (2S,3S,4S,5S,6R)-2-(acetoxymethyl)-6-(4-formylphenoxy)tetrahydro-2H-pyran-3,4,5-triyl triacetate (0.3 mmol, 135.6 mg) and acrylonitrile (0.2 mmol, 10.6 mg) at 110 °C for 24 h. Purified by flash column chromatography on silica gel (PE:EA = 5:1) to give **28** as a yellow jelly (56.0 mg, 51% yield, 1:1 *regioisomer*).

<sup>1</sup>H NMR (400 MHz, CDCl<sub>3</sub>) δ 7.98 (d, *J* = 9.2 Hz, 2H), 7.11 (d, *J* = 8.8 Hz, 2H), 5.75 (dd, *J* = 2.8 Hz, 2.8 Hz, 1H), 5.47 (d, *J* = 8.0 Hz, 1H), 5.18 (dd, *J* = 8.0, 4.0 Hz, 1H), 5.08 – 5.04 (m, 1H), 4.33 – 4.23 (m, 4H), 2.17 (s, 3H), 2.07 (s, 3H), 2.04 (s, 3H), 2.03 (s, 3H), 1.62 (d, *J* = 7.2 Hz, 3H).

$^{13}\text{C}$  NMR (100 MHz,  $\text{CDCl}_3$ )  $\delta$  189.3, (189.2), 170.7, 169.8, 169.2, (169.1), 161.7, (161.6), 131.2, 128.8, 118.4 (118.4), 116.9, 96.5, (96.5), 70.9, 68.8, 68.4, 66.2, (66.2), 62.4, (62.3), 33.6, (33.6), 20.8, (20.8), 20.7, (20.6), 14.9, (14.9).

HRMS (ESI): Calcd for  $[\text{C}_{24}\text{H}_{27}\text{NO}_{11}\text{Na}]^+ [\text{M}+\text{Na}]^+$  528.1476, Found 528.1469.

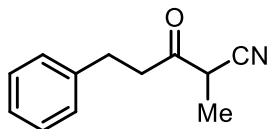

**2-Methyl-3-oxo-5-phenylpentanenitrile (29).** Synthesized according to the **General Procedure A** with 3-phenylpropanal (0.3 mmol, 40.2 mg) and acrylonitrile (0.2 mmol, 10.6 mg) at 85 °C for 6 h. Purified by flash column chromatography on silica gel (PE:EA = 15:1) to give **29** as a colorless oil (12.7 mg, 34% yield).

$^1\text{H}$  NMR (400 MHz,  $\text{CDCl}_3$ )  $\delta$  7.30 (dd,  $J$  = 8.4, 7.6 Hz, 2H), 7.23 – 7.18 (m, 3H), 3.38 (q,  $J$  = 7.2 Hz, 1H), 3.13 – 3.07 (m, 1H), 3.05 – 2.99 (m, 1H), 2.97 – 2.93 (m, 2H), 1.45 (d,  $J$  = 7.2 Hz, 3H).

$^{13}\text{C}$  NMR (100 MHz,  $\text{CDCl}_3$ )  $\delta$  200.3, 140.1, 128.8, 128.5, 126.7, 118.3, 42.3, 38.1, 29.7, 14.1.

HRMS (ESI): Calcd for  $[\text{C}_{12}\text{H}_{14}\text{NO}]^+ [\text{M}+\text{H}]^+$  188.1070, Found 188.1077.

The data are consistent with the reported literature.<sup>3</sup>

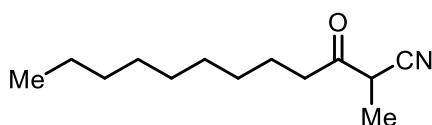

**2-Methyl-3-oxododecanenitrile (30).** Synthesized according to the **General Procedure A** with decanal (0.3 mmol, 46.8 mg) and acrylonitrile (0.2 mmol, 10.6 mg) at 85 °C for 6 h. Purified by flash column chromatography on silica gel (PE:EA = 15:1) to give **30** as a colorless oil (14.6 mg, 35% yield).

$^1\text{H}$  NMR (400 MHz,  $\text{CDCl}_3$ )  $\delta$  3.43 (q,  $J$  = 7.2 Hz, 1H), 2.81 – 2.59 (m, 2H), 1.67 – 1.56 (m, 2H), 1.48 (d,  $J$  = 7.2 Hz, 3H), 1.28 – 1.26 (m, 12H), 0.87 (t,  $J$  = 6.4 Hz, 3H).

$^{13}\text{C}$  NMR (100 MHz,  $\text{CDCl}_3$ )  $\delta$  201.2, 118.5, 40.8, 37.8, 32.0, 29.5, 29.4, 29.1, 23.6, 22.8, 14.2, 14.2.

HRMS (ESI): Calcd for  $[\text{C}_{13}\text{H}_{23}\text{NONa}]^+ [\text{M}+\text{Na}]^+$  232.1672, Found 232.1677.

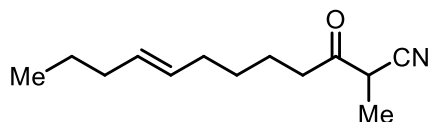

**2-Methyl-3-oxododec-8-enenitrile (31)** Synthesized according to the **General Procedure A** with dec-6-enal (0.3 mmol, 46.2 mg, *E/Z* isomers, major *E* isomer) and acrylonitrile (0.2 mmol, 10.6 mg) at 85 °C for 6 h. Purified by flash column chromatography on silica gel (PE:EA = 15:1) to give **31** as a colorless oil (14.9 mg, 36% yield).

$^1\text{H}$  NMR (400 MHz,  $\text{CDCl}_3$ )  $\delta$  5.51 – 5.42 (m, 1H), 5.41 – 5.24 (m, 1H), 3.42 (q,  $J$  = 7.2 Hz, 1H), 2.85 – 2.68 (m, 2H), 2.42 – 2.24 (m, 2H), 2.05 – 1.93 (m, 2H), 1.48 (d,  $J$  = 7.2 Hz, 3H), 1.38 – 1.18 (m, 6H), 0.87 (t,  $J$  = 6.8 Hz, 3H).

$^{13}\text{C}$  NMR (100 MHz,  $\text{CDCl}_3$ )  $\delta$  200.6, 132.8, (132.4), 127.2, (126.7), 118.4, 40.7, 37.9, 32.6, (31.6), 31.5, (29.4), 29.2, (27.3), 26.6, (22.7), 22.6, 21.5, 14.1.

HRMS (ESI): Calcd for  $[\text{C}_{13}\text{H}_{21}\text{NONa}]^+ [\text{M}+\text{Na}]^+$  230.1515, Found 230.1517.

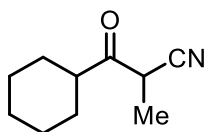

**3-Cyclohexyl-2-methyl-3-oxopropanenitrile (32).** Synthesized according to the **General Procedure A** with cyclohexanecarbaldehyde (0.3 mmol, 33.6 mg) and acrylonitrile (0.2 mmol, 10.6 mg) at 85 °C for 6 h. Purified by flash column chromatography on silica gel (PE:EA = 15:1) to give **32** as a colorless oil (12.5 mg, 38% yield).

$^1\text{H}$  NMR (400 MHz,  $\text{CDCl}_3$ )  $\delta$  3.54 (q,  $J = 7.2$  Hz, 1H), 2.79 – 2.73 (m, 1H), 1.91 – 1.88 (m, 2H), 1.85 – 1.74 (m, 2H), 1.74 – 1.62 (m, 1H), 1.46 (d,  $J = 7.2$  Hz, 3H), 1.43 – 1.29 (m, 4H), 1.26 – 1.18 (m, 1H).

$^{13}\text{C}$  NMR (100 MHz,  $\text{CDCl}_3$ )  $\delta$  203.9, 118.5, 49.0, 36.0, 28.9, 28.5, 25.6, 25.5, 25.3, 14.2.

HRMS (ESI): Calcd for  $[\text{C}_{10}\text{H}_{15}\text{NONa}]^+ [\text{M}+\text{Na}]^+$  188.1046, Found 188.1042.

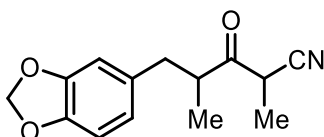

**5-(Benzo[d][1,3]dioxol-5-yl)-2,4-dimethyl-3-oxopentanenitrile (33).** Synthesized according to the **General Procedure A** with 3-(benzo[d][1,3]dioxol-5-yl)-2-methylpropanal (0.3 mmol, 57.6 mg) and acrylonitrile (0.2 mmol, 10.6 mg) at 85 °C for 6 h. Purified by flash column chromatography on silica gel (PE:EA = 10:1) to give **33** as a pale yellow oil (19.1 mg, 39% yield, d.r. = 1.2:1.).

$^1\text{H}$  NMR (400 MHz,  $\text{CDCl}_3$ ) *Major isomer:*  $\delta$  6.73 – 6.70 (m, 1H), 6.68 – 6.54 (m, 2H), 5.92 (s, 2H), 3.26 – 3.20 (m, 1H), 3.14 (q,  $J = 7.2$  Hz, 1H), 2.98 – 2.85 (m, 1H), 2.61 – 2.52 (m, 1H), 1.32 (d,  $J = 7.2$  Hz, 3H), 1.17 (d,  $J = 6.8$  Hz, 3H). *Minor isomer:* 3.41 – 3.35 (m, 1H), 1.41 (d,  $J = 7.6$  Hz, 3H), 1.20 (d,  $J = 6.8$  Hz, 3H).

$^{13}\text{C}$  NMR (100 MHz,  $\text{CDCl}_3$ ) *Major isomer:*  $\delta$  204.6, 148.0, 146.5, 132.5, 122.1, 118.2, 109.2, 108.5, 101.1, 47.3, 39.7, 38.0, 17.2, 13.6. *Minor isomer:*  $\delta$  204.5, 147.9, 146.4, 132.5, 121.9, 118.2, 109.3, 108.5, 101.1, 46.7, 39.0, 37.4, 17.1, 14.0.

HRMS (ESI): Calcd for  $[\text{C}_{14}\text{H}_{15}\text{NO}_3\text{Na}]^+ [\text{M}+\text{Na}]^+$  268.0944, Found 268.0937.

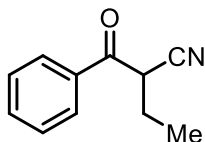

**2-Benzoylbutanenitrile (34).** Synthesized according to the **General Procedure A** with benzaldehyde (0.3 mmol, 31.8 mg) and but-2-enenitrile (0.2 mmol, 13.4 mg) at 85 °C for 6 h. Purified by flash column chromatography on silica gel (PE:EA = 15:1) to give **34** as a colorless oil (21.1 mg, 61% yield).

$^1\text{H}$  NMR (400 MHz,  $\text{CDCl}_3$ )  $\delta$  7.96 – 7.94 (m, 2H), 7.64 (dd,  $J = 7.6, 7.2$  Hz, 1H), 7.51 (dd,  $J = 8.0, 7.6$  Hz, 2H), 4.32 (dd,  $J = 8.0, 5.6$  Hz, 1H), 2.16 – 1.94 (m, 2H), 1.15 (t,  $J = 7.6$  Hz, 3H).

$^{13}\text{C}$  NMR (100 MHz,  $\text{CDCl}_3$ )  $\delta$  191.0, 134.6, 134.1, 129.2, 128.8, 117.4, 41.6, 23.7, 11.6.

HRMS (ESI): Calcd for  $[C_{11}H_{11}NONa]^+$   $[M+Na]^+$  196.0733, Found 196.0734.

Synthesized according to the **General Procedure B** with benzalcohol (0.2 mmol, 21.6 mg) and but-2-enenitrile (0.4 mmol, 26.8 mg) at 85 °C for 4 h. Purified by flash column chromatography on silica gel (PE:EA = 10:1) to give **34** as a colorless oil (20.1 mg, 58% yield).

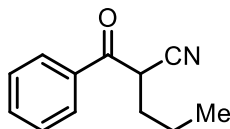

**2-Benzoylpentanenitrile (35).** Synthesized according to the **General Procedure A** with benzaldehyde (0.3 mmol, 31.8 mg) and pent-2-enenitrile (0.2 mmol, 16.2 mg) at 85 °C for 6 h. Purified by flash column chromatography on silica gel (PE:EA = 15:1) to give **35** as a colorless oil (18.7 mg, 50% yield).

$^1H$  NMR (400 MHz,  $CDCl_3$ )  $\delta$  7.96 – 7.94 (m, 2H), 7.64 (dd,  $J$  = 7.6, 7.2 Hz, 1H), 7.51 (dd,  $J$  = 8.0, 7.6 Hz, 2H), 4.37 (dd,  $J$  = 7.6, 15.2 Hz, 1H), 2.00 – 1.92 (m, 2H), 1.68 – 1.47 (m, 2H), 0.99 (t,  $J$  = 7.2 Hz, 3H).

$^{13}C$  NMR (100 MHz,  $CDCl_3$ )  $\delta$  191.1, 134.5, 134.1, 129.2, 128.8, 117.5, 40.0, 32.0, 20.5, 13.5.

HRMS (ESI): Calcd for  $[C_{12}H_{13}NONa]^+$   $[M+Na]^+$  210.0889, Found 210.0898.

Synthesized according to the **General Procedure B** with benzalcohol (0.2 mmol, 21.6 mg) and pent-2-enenitrile (0.4 mmol, 32.4 mg) at 85 °C for 4 h. Purified by flash column chromatography on silica gel (PE:EA = 10:1) to give **35** as a colorless oil (16.8 mg, 45% yield).

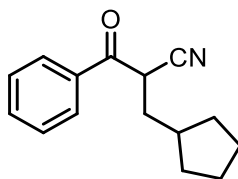

**2-(Cyclopentylmethyl)-3-oxo-3-phenylpropanenitrile (36).** Synthesized according to the **General Procedure A** with benzaldehyde (0.3 mmol, 31.8 mg) and 3-cyclopentylacrylonitrile (*Z/E*) (0.2 mmol, 24.2 mg) at 85 °C for 6 h. Purified by flash column chromatography on silica gel (PE:EA = 15:1) to give **36** as a colorless oil (20.3 mg, 45% yield).

$^1H$  NMR (400 MHz,  $CDCl_3$ )  $\delta$  7.96 (d,  $J$  = 7.6, 2H), 7.65 (dd,  $J$  = 7.6, 6.8 Hz, 1H), 7.53 (dd,  $J$  = 8.0, 7.6 Hz, 2H), 4.35 (dd,  $J$  = 9.6, 5.2 Hz, 1H), 2.15 – 2.02 (m, 2H), 2.02 – 1.78 (m, 3H), 1.74 – 1.49 (m, 5H), 1.17 (m, 1H).

$^{13}C$  NMR (100 MHz,  $CDCl_3$ )  $\delta$  191.1, 134.6, 134.2, 129.3, 128.9, 117.7, 39.7, 38.2, 36.2, 32.8, 32.3, 25.2.

HRMS (ESI): Calcd for  $[C_{15}H_{17}NONa]^+$   $[M+Na]^+$  250.1202, Found 250.1209.

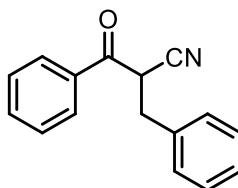

**2-Benzyl-3-oxo-3-phenylpropanenitrile (37).** Synthesized according to the **General Procedure A** with benzaldehyde (0.3 mmol, 31.8 mg) and 3-phenylacrylonitrile (0.2 mmol, 25.8 mg) at 85 °C for 6 h.

Purified by flash column chromatography on silica gel (PE:EA = 15:1) to give **37** as a colorless oil (28.7 mg, 62% yield).

$^1\text{H}$  NMR (400 MHz,  $\text{CDCl}_3$ )  $\delta$  7.97 – 7.65 (m, 2H), 7.65 (dd,  $J$  = 7.6, 7.2 Hz, 1H), 7.52 (dd,  $J$  = 8.0, 7.6 Hz, 2H), 7.41 – 7.28 (m, 5H), 4.52 (dd,  $J$  = 8.4, 5.6 Hz, 1H), 3.37 (dd,  $J$  = 14.0, 5.6 Hz, 1H), 3.25 (dd,  $J$  = 14.0, 8.8 Hz, 1H).

$^{13}\text{C}$  NMR (100 MHz,  $\text{CDCl}_3$ )  $\delta$  190.1, 136.1, 134.7, 134.3, 129.3, 129.2, 129.1, 129.0, 127.8, 117.1, 41.9, 35.7.

HRMS (ESI): Calcd for  $[\text{C}_{16}\text{H}_{13}\text{NONa}]^+ [\text{M}+\text{Na}]^+$  258.0889, Found 258.0882.

The data are consistent with the reported literature.<sup>2</sup>

Synthesized according to the **General Procedure B** with benzalcohol (0.2 mmol, 21.6 mg) and 3-phenylacrylonitrile (0.4 mmol, 51.6 mg) at 85 °C for 4 h. Purified by flash column chromatography on silica gel (PE:EA = 15:1) to give **37** as a colorless oil (22.1 mg, 47% yield).

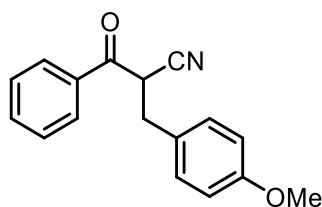

**2-(4-Methoxybenzyl)-3-oxo-3-phenylpropanenitrile (38).** Synthesized according to the **General Procedure A** with benzaldehyde (0.3 mmol, 31.8 mg) and 3-(4-methoxyphenyl)acrylonitrile (0.2 mmol, 31.8 mg) at 85 °C for 6 h. Purified by flash column chromatography on silica gel (PE:EA = 10:1) to give **38** as a colorless oil (28.0 mg, 53% yield).

$^1\text{H}$  NMR (400 MHz,  $\text{CDCl}_3$ )  $\delta$  7.98 – 7.91 (m, 2H), 7.65 (dd,  $J$  = 7.6, 7.2 Hz, 1H), 7.51 (dd,  $J$  = 8.0, 7.6 Hz, 2H), 7.20 (d,  $J$  = 8.8 Hz, 2H), 6.86 (d,  $J$  = 8.4 Hz, 2H), 4.50 (dd,  $J$  = 8.4, 5.6 Hz, 1H), 3.78 (s, 3H), 3.30 (dd,  $J$  = 14.4, 6.0 Hz, 1H), 3.19 (dd,  $J$  = 14.0, 8.8 Hz, 1H).

$^{13}\text{C}$  NMR (100 MHz,  $\text{CDCl}_3$ )  $\delta$  190.3, 159.3, 134.7, 134.3, 130.3, 129.3, 128.9, 128.0, 117.2, 114.5, 55.4, 42.3, 35.0.

HRMS (ESI): Calcd for  $[\text{C}_{17}\text{H}_{15}\text{NO}_2\text{Na}]^+ [\text{M}+\text{Na}]^+$  288.0995, Found 288.0986.

The data are consistent with the reported literature.<sup>2</sup>

Synthesized according to the **General Procedure B** with benzalcohol (0.2 mmol, 21.6 mg) and 3-(4-methoxyphenyl)acrylonitrile (0.4 mmol, 63.6 mg) at 85 °C for 4 h. Purified by flash column chromatography on silica gel (PE:EA = 10:1) to give **38** as a colorless oil (8.5 mg, 16% yield).

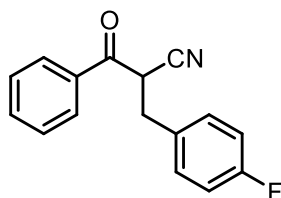

**2-(4-Fluorobenzyl)-3-oxo-3-phenylpropanenitrile (39).** Synthesized according to the **General Procedure A** with benzaldehyde (0.3 mmol, 31.8 mg) and 3-(4-fluorophenyl)acrylonitrile (0.2 mmol, 29.4 mg) at 85 °C for 6 h. Purified by flash column chromatography on silica gel (PE:EA = 10:1) to give **39** as a colorless oil (32.0 mg, 63% yield).

$^1\text{H}$  NMR (400 MHz,  $\text{CDCl}_3$ )  $\delta$  7.96 – 7.94 (m, 2H), 7.66 (dd,  $J$  = 7.6, 7.2 Hz, 1H), 7.52 (dd,  $J$  = 8.0, 7.6

Hz, 2H), 7.27 – 7.24 (m, 2H), 7.02 (dd,  $J = 8.8, 8.4$  Hz, 2H), 4.49 (dd,  $J = 8.4, 6.0$  Hz, 1H), 3.34 (dd,  $J = 14.4, 6.0$  Hz, 1H), 3.23 (dd,  $J = 14.4, 8.4$  Hz, 1H).

$^{13}\text{C}$  NMR (100 MHz,  $\text{CDCl}_3$ )  $\delta$  189.9, 163.5 (d,  $J = 244.9$  Hz), 134.8, 134.2, 131.8 (d,  $J = 3.1$  Hz), 130.9 (d,  $J = 8.0$  Hz), 129.3, 128.9, 116.9, 116.0 (d,  $J = 21.3$  Hz), 41.9, 34.8.

$^{19}\text{F}$  NMR (376 MHz,  $\text{CDCl}_3$ )  $\delta$  -114.6.

HRMS (ESI): Calcd for  $[\text{C}_{16}\text{H}_{12}\text{FNOK}]^+ [\text{M}+\text{K}]^+$  292.0535, Found 292.0535.

Synthesized according to the **General Procedure B** with benzalcohol (0.2 mmol, 21.6 mg) and 3-(4-fluorophenyl)acrylonitrile (0.4 mmol, 58.8 mg) at 85 °C for 4 h. Purified by flash column chromatography on silica gel (PE:EA = 10:1) to give **39** as a colorless oil (17.7 mg, 35% yield).

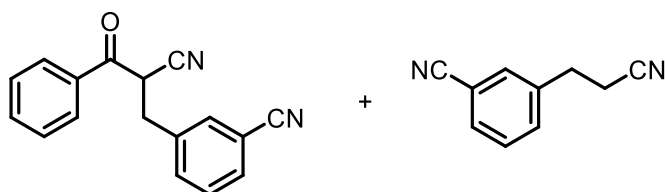

**3-(2-Cyano-3-oxo-3-phenylpropyl)benzonitrile (40).** Synthesized according to the **General Procedure A** with benzaldehyde (0.3 mmol, 31.8 mg) and 3-cyano-cinnamionitrile (0.2 mmol, 30.8 mg) at 85 °C for 6 h. Purified by flash column chromatography on silica gel (PE:EA = 10:1) to give a mixture (40.3 mg) of **40** (70% yield) and 3-(3-cyanophenyl)propanenitrile (13% yield, reductive product of 3-cyano-cinnamionitrile) as a colorless oil.

**40:**  $^1\text{H}$  NMR (400 MHz,  $\text{CDCl}_3$ )  $\delta$  7.97 (d,  $J = 7.6$  Hz, 2H), 7.67 (dd,  $J = 7.6, 7.2$  Hz, 1H), 7.61 – 7.42 (m, 6H), 4.55 (dd,  $J = 8.4, 6.0$  Hz, 1H), 3.40 (dd,  $J = 10.0, 6.0$  Hz, 1H), 3.29 (dd,  $J = 10.0, 4.4$  Hz, 1H).

$^{13}\text{C}$  NMR (100 MHz,  $\text{CDCl}_3$ )  $\delta$  189.1, 137.4, 134.9, 133.8, 132.6, 131.4, 129.7, 129.2, 128.8, 118.5, 118.3, 116.3, 113.0, 40.9, 34.4.

HRMS (ESI): Calcd for  $[\text{C}_{17}\text{H}_{12}\text{N}_2\text{ONa}]^+ [\text{M}+\text{Na}]^+$  292.0535, Found 292.0535.

**3-(3-Cyanophenyl)propanenitrile:**  $^1\text{H}$  NMR (400 MHz,  $\text{CDCl}_3$ )  $\delta$  7.61 – 7.42 (m, 4H), 3.00 (t,  $J = 7.2$  Hz, 2H), 2.65 (t,  $J = 7.2$  Hz, 2H).

$^{13}\text{C}$  NMR (100 MHz,  $\text{CDCl}_3$ )  $\delta$  139.5, 133.0, 132.0, 131.2, 31.1, 19.1.

The data are consistent with the reported literature.<sup>4</sup>

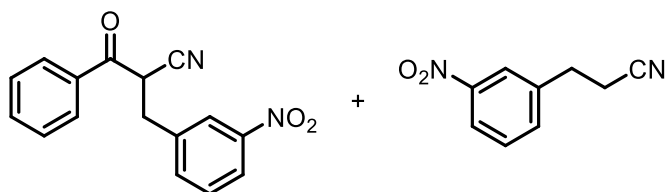

**2-(3-Nitrobenzyl)-3-oxo-3-phenylpropanenitrile (41).** Synthesized according to the **General Procedure A** with benzaldehyde (0.3 mmol, 31.8 mg) and 3-nitro-cinnamionitrile (0.2 mmol, 34.8 mg) at 85 °C for 6 h. Purified by flash column chromatography on silica gel (PE:EA = 10:1) to give a mixture (41.6 mg) of **41** (66% yield) and 3-(3-nitrophenyl)propanenitrile (13% yield, reductive product of 3-nitro-cinnamionitrile) as a colorless oil.

**41:**  $^1\text{H}$  NMR (400 MHz,  $\text{CDCl}_3$ )  $\delta$  8.15 – 8.10 (m, 2H), 7.98 (d,  $J = 7.6$  Hz, 2H), 7.72 – 7.46 (m, 5H), 4.64 (dd,  $J = 8.4, 6.0$  Hz, 1H), 3.47 (dd,  $J = 14.4, 6.0$  Hz, 1H), 3.36 (dd,  $J = 14.0, 8.4$  Hz, 1H).

$^{13}\text{C}$  NMR (100 MHz,  $\text{CDCl}_3$ )  $\delta$  189.3, 148.6, 138.0, 135.7, 135.0, 133.9, 130.0, 129.4, 129.0, 124.1, 122.9, 116.5, 41.0, 34.6.

HRMS (ESI): Calcd for  $[C_{16}H_{13}N_2O_3]^+ [M+H]^+$  281.0921, Found 281.0916.

**3-(3-Nitrophenyl)propanenitrile** :  $^1H$  NMR (400 MHz,  $CDCl_3$ )  $\delta$  7.72 – 7.46 (m, 4H), 3.07 (t,  $J$  = 7.2 Hz, 2H), 2.70 (t,  $J$  = 7.2 Hz, 2H).

$^{13}C$  NMR (100 MHz,  $CDCl_3$ )  $\delta$  148.6, 139.9, 134.8, 123.4, 122.6, 118.5, 31.1, 19.1.

The data are consistent with the reported literature.<sup>5</sup>

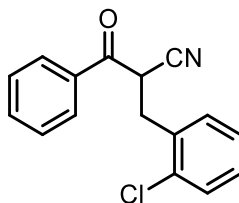

**2-(2-Chlorobenzyl)-3-oxo-3-phenylpropanenitrile (42)**. Synthesized according to the **General Procedure A** with benzaldehyde (0.3 mmol, 31.8 mg) and 3-(2-chlorophenyl)acrylonitrile (0.2 mmol, 32.6 mg) at 85 °C for 6 h. Purified by flash column chromatography on silica gel (PE:EA = 10:1) to give **42** as a colorless oil (37.0 mg, 69% yield).

$^1H$  NMR (400 MHz,  $CDCl_3$ )  $\delta$  8.00 (d,  $J$  = 7.6 Hz, 2H), 7.64 (dd,  $J$  = 7.6, 7.2 Hz, 1H), 7.51 (dd,  $J$  = 8.0, 7.6 Hz, 2H), 7.40 – 7.38 (m, 2H), 7.26 – 7.24 (m, 2H), 4.78 (dd,  $J$  = 9.6, 6.0 Hz, 1H), 3.55 (dd,  $J$  = 14.0, 6.0 Hz, 1H), 3.24 (dd,  $J$  = 14.0, 9.6 Hz, 1H).

$^{13}C$  NMR (100 MHz,  $CDCl_3$ )  $\delta$  190.1, 134.8, 134.2, 134.0, 133.6, 132.3, 129.9, 129.5, 129.2, 129.0, 127.6, 116.7, 39.4, 33.9.

HRMS (ESI): Calcd for  $[C_{16}H_{12}ClN_2O]^+ [M+Na]^+$  292.0500, Found 292.0508.

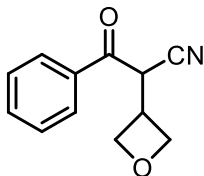

**2-(Oxetan-3-yl)-3-oxo-3-phenylpropanenitrile (43)**. Synthesized according to the **General Procedure A** with benzaldehyde (0.3 mmol, 31.8 mg) and 2-(oxetan-3-ylidene)acetonitrile (0.2 mmol, 19.0 mg) at 85 °C for 6 h. Purified by flash column chromatography on silica gel (PE:EA = 10:1) to give **43** as a colorless oil (21.3 mg, 53% yield).

$^1H$  NMR (400 MHz,  $CDCl_3$ )  $\delta$  7.94 (d,  $J$  = 7.2 Hz, 2H), 7.53 – 7.38 (m, 3H), 4.70 (dd,  $J$  = 10.0, 9.2 Hz, 1H), 4.62 (dd,  $J$  = 9.6, 6.4 Hz, 1H), 3.90 – 3.73 (m, 2H), 3.57 – 3.50 (m, 1H), 2.35 – 2.07 (m, 1H).

$^{13}C$  NMR (100 MHz,  $CDCl_3$ )  $\delta$  168.9, 131.7, 128.8, 127.9, 127.3, 117.5, 80.7, 74.0, 63.0, 46.8.

HRMS (ESI): Calcd for  $[C_{12}H_{11}NO_2Na]^+ [M+Na]^+$  224.0682, Found 224.0679.

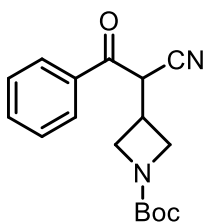

**tert-Butyl 3-(1-cyano-2-oxo-2-phenylethyl)azetidine-1-carboxylate (44)**. Synthesized according to

the **General Procedure A** with benzaldehyde (0.3 mmol, 31.8 mg) and *tert*-butyl 3-(cyanomethylene)azetidine-1-carboxylate (0.2 mmol, 19.0 mg) at 85 °C for 6 h. Purified by flash column chromatography on silica gel (PE:EA = 10:1) to give **44** as a yellow oil (44.0 mg, 73% yield).

<sup>1</sup>H NMR (400 MHz, Benzene-*d*<sub>6</sub>) δ 7.68 (d, *J* = 7.6 Hz, 2H), 7.19 – 7.10 (m, 1H), 7.03 (dd, *J* = 7.6, 7.6 Hz, 2H), 4.00 – 3.80 (m, 3H), 3.72 (d, *J* = 7.6 Hz, 1H), 3.66 – 3.43 (m, 1H), 2.60 (d, *J* = 6.0 Hz, 1H), 1.43 (s, 9H).

<sup>13</sup>C NMR (400 MHz, Benzene-*d*<sub>6</sub>) δ 189.2, 156.0, 134.6, 134.2, 129.1, 129.1, 115.6, 79.4, 42.6, 28.4, 28.4.

HRMS (ESI): Calcd for [C<sub>17</sub>H<sub>20</sub>N<sub>2</sub>O<sub>3</sub>Na]<sup>+</sup> [M+Na]<sup>+</sup> 323.1366, Found 323.1365.

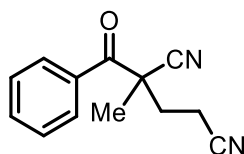

**2-Benzoyl-2-methylpentanedinitrile (4).** Synthesized according to the **General Procedure A** with benzaldehyde (0.3 mmol, 31.8 mg) and 2-methylenepentanedinitrile (0.2 mmol, 21.2 mg) at 85 °C for 6 h. Purified by flash column chromatography on silica gel (PE:EA = 10:1) to give **4** as a yellow oil (10.6 mg, 25% yield).

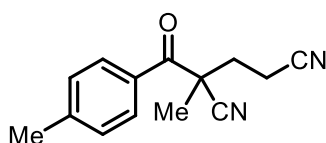

**2-Methyl-2-(4-methylbenzoyl)pentanedinitrile (45).** Synthesized according to the **General Procedure C** with *p*-tolylmethanol (0.2 mmol, 24.4 mg) and acrylonitrile (1.0 mmol, 53.0 mg) at 85 °C for 12 h. Purified by flash column chromatography on silica gel (PE:EA = 6:1) to give **45** as a colorless oil (29.4 mg, 65% yield).

<sup>1</sup>H NMR (400 MHz, CDCl<sub>3</sub>) δ 8.05 (d, *J* = 8.4 Hz, 2H), 7.32 (d, *J* = 8.0 Hz, 2H), 2.67 – 2.53 (m, 3H), 2.44 (s, 3H), 2.16 (ddd, *J* = 15.2, 10.8, 4.8 Hz, 1H), 1.77 (s, 3H).

<sup>13</sup>C NMR (100 MHz, CDCl<sub>3</sub>) δ 191.9, 145.9, 130.7, 129.7, 129.7, 120.6, 118.2, 44.9, 33.6, 24.9, 21.9, 13.9.

HRMS (ESI): Calcd for [C<sub>14</sub>H<sub>14</sub>N<sub>2</sub>ONa]<sup>+</sup> [M + Na]<sup>+</sup> 249.0998, Found 249.0990.

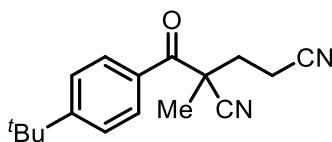

**2-(4-(*tert*-Butyl)benzoyl)-2-methylpentanedinitrile (46).** Synthesized according to the **General Procedure C** with (4-(*tert*-butyl)phenyl)methanol (0.2 mmol, 32.8 mg) and acrylonitrile (1.0 mmol, 53.0 mg) at 85 °C for 12 h. Purified by flash column chromatography on silica gel (PE:EA = 6:1) to give **46** as a colorless oil (24.7 mg, 46% yield).

<sup>1</sup>H NMR (400 MHz, CDCl<sub>3</sub>) δ 8.10 (d, *J* = 8.8 Hz, 2H), 7.53 (d, *J* = 8.8 Hz, 2H), 2.68 – 2.53 (m, 3H), 2.17 (ddd, *J* = 14.4, 10.4, 4.8 Hz, 1H), 1.78 (s, 3H), 1.35 (s, 9H).

<sup>13</sup>C NMR (100 MHz, CDCl<sub>3</sub>) δ 191.8, 158.8, 130.6, 129.7, 126.1, 120.6, 118.2, 44.9, 35.5, 33.6, 31.1,

24.8, 13.9.

HRMS (ESI): Calcd for  $[C_{17}H_{20}N_2ONa]^+ [M + Na]^+$  291.1468, Found 291.1459.

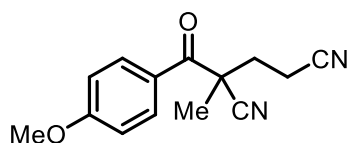

**2-(4-Methoxybenzoyl)-2-methylpentanedinitrile (47).** Synthesized according to the **General Procedure C** with (4-methoxyphenyl)methanol (0.2 mmol, 27.6 mg) and acrylonitrile (1.0 mmol, 53.0 mg) at 85 °C for 12 h. Purified by flash column chromatography on silica gel (PE:EA = 6:1) to give **47** as a colorless oil (30 mg, 62% yield).

$^1H$  NMR (400 MHz,  $CDCl_3$ )  $\delta$  8.16 (d,  $J$  = 6.8 Hz, 2H), 6.98 (d,  $J$  = 8.8 Hz, 2H), 3.89 (s, 3H), 2.67 – 2.48 (m, 3H), 2.15 (ddd,  $J$  = 15.2, 10.4, 4.4 Hz, 1H), 1.76 (s, 3H).

$^{13}C$  NMR (100 MHz,  $CDCl_3$ )  $\delta$  190.3, 164.6, 132.2, 125.9, 120.8, 118.3, 114.3, 55.8, 44.6, 33.6, 24.9, 13.8.

HRMS (ESI): Calcd for  $[C_{14}H_{14}N_2O_2Na]^+ [M + Na]^+$  265.0947, Found 265.0956.

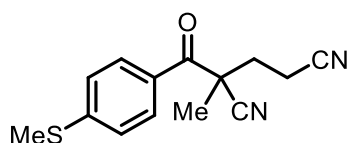

**2-Methyl-2-(4-(methylthio)benzoyl)pentanedinitrile (48).** Synthesized according to the **General Procedure C** with (4-(methylthio)phenyl)methanol (0.2 mmol, 30.8 mg) and acrylonitrile (1.0 mmol, 53.0 mg) at 85 °C for 12 h. Purified by flash column chromatography on silica gel (PE:EA = 6:1) to give **48** as a yellow oil (26.8 mg, 52% yield).

$^1H$  NMR (400 MHz,  $CDCl_3$ )  $\delta$  8.07 (d,  $J$  = 8.4 Hz, 2H), 7.30 (d,  $J$  = 8.8 Hz, 2H), 2.67 – 2.54 (m, 3H), 2.53 (s, 3H), 2.15 (ddd,  $J$  = 14.8, 10.4, 4.4 Hz, 1H), 1.77 (s, 3H).

$^{13}C$  NMR (100 MHz,  $CDCl_3$ )  $\delta$  191.0, 148.7, 129.9, 129.1, 125.1, 120.6, 118.2, 44.8, 33.6, 24.9, 14.7, 13.9.

HRMS (ESI): Calcd for  $[C_{14}H_{14}N_2OSNa]^+ [M + Na]^+$  281.0719, Found 281.0722.

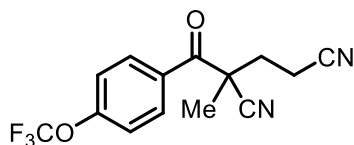

**2-Methyl-2-(4-(trifluoromethoxy)benzoyl)pentanedinitrile (49).** Synthesized according to the **General Procedure C** with (4-(trifluoromethoxy)phenyl)methanol (0.2 mmol, 38.4 mg) and acrylonitrile (1.0 mmol, 53.0 mg) at 85 °C for 12 h. Purified by flash column chromatography on silica gel (PE:EA = 6:1) to give **49** as a colorless oil (30.8 mg, 52% yield).

$^1H$  NMR (400 MHz,  $CDCl_3$ )  $\delta$  8.23 (d,  $J$  = 8.8 Hz, 2H), 7.35 (d,  $J$  = 8.4 Hz, 2H), 2.69 – 2.56 (m, 3H), 2.18 (ddd,  $J$  = 14.8, 10.0, 4.8 Hz, 1H), 1.79 (s, 3H).

$^{13}C$  NMR (100 MHz,  $CDCl_3$ )  $\delta$  191.0, 153.7, 131.9, 131.4, 120.6, 120.4 (q,  $J$  = 258.2 Hz), 120.2, 118.0, 45.1, 33.4, 24.8, 13.9.

$^{19}F$  NMR (376 MHz,  $CDCl_3$ )  $\delta$  –57.58.

HRMS (ESI): Calcd for  $[\text{C}_{14}\text{H}_{11}\text{N}_2\text{O}_2\text{F}_3\text{Na}]^+ [\text{M} + \text{Na}]^+$  319.0665, Found 319.0661.

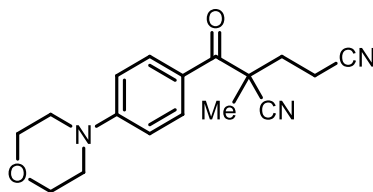

**2-Methyl-2-(4-morpholinobenzoyl)pentanedinitrile (50).** Synthesized according to the **General Procedure C** with (4-morpholinophenyl)methanol (0.2 mmol, 38.6 mg) and acrylonitrile (1.0 mmol, 53.0 mg) at 85 °C for 12 h. Purified by flash column chromatography on silica gel (PE:EA = 10:1) to give **50** as a brown oil (30.9 mg, 52% yield).

$^1\text{H}$  NMR (400 MHz,  $\text{CDCl}_3$ )  $\delta$  8.10 (d,  $J$  = 8.8 Hz, 2H), 6.86 (d,  $J$  = 9.2 Hz, 2H), 3.84 (t,  $J$  = 5.2 Hz, 4H), 3.36 (t,  $J$  = 5.2 Hz, 4H), 2.71 – 2.41 (m, 3H), 2.12 (ddd,  $J$  = 15.2, 10.8, 4.4 Hz, 1H), 1.74 (s, 3H).

$^{13}\text{C}$  NMR (100 MHz,  $\text{CDCl}_3$ )  $\delta$  189.4, 154.8, 132.0, 122.8, 121.1, 118.4, 112.9, 66.5, 47.0, 44.2, 33.6, 24.9, 13.8.

HRMS (ESI): Calcd for  $[\text{C}_{17}\text{H}_{20}\text{N}_3\text{O}_2]^+ [\text{M} + \text{H}]^+$  298.1550, Found 298.1546.

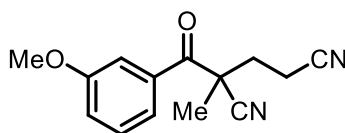

**2-(3-Methoxybenzoyl)-2-methylpentanedinitrile (51).** Synthesized according to the **General Procedure C** with 3-methoxybenzaldehyde (0.2 mmol, 27.2 mg) and acrylonitrile (1.0 mmol, 53.0 mg) at 85 °C for 12 h. Purified by flash column chromatography on silica gel (PE:EA = 6:1) to give **51** as a brown oil (24.2 mg, 50% yield).

$^1\text{H}$  NMR (400 MHz,  $\text{CDCl}_3$ )  $\delta$  7.78 (ddd,  $J$  = 7.6, 1.6, 0.8 Hz, 1H), 7.59 (dd,  $J$  = 2.4, 2.0 Hz, 1H), 7.43 (dd,  $J$  = 8.0, 8.0 Hz, 1H), 7.19 (ddd,  $J$  = 8.0, 2.4, 0.8 Hz, 1H), 3.87 (s, 3H), 2.68 – 2.55 (m, 3H), 2.17 (ddd,  $J$  = 15.2, 10.4, 6.4 Hz, 1H), 1.78 (s, 3H).

$^{13}\text{C}$  NMR (100MHz,  $\text{CDCl}_3$ )  $\delta$  192.4, 160.1, 134.6, 130.0, 121.9, 121.0, 120.4, 118.1, 114.1, 55.7, 45.2, 33.6, 24.9, 13.9.

HRMS (ESI): Calcd for  $[\text{C}_{14}\text{H}_{14}\text{N}_2\text{O}_2\text{Na}]^+ [\text{M} + \text{Na}]^+$  265.0947, Found 265.0942.

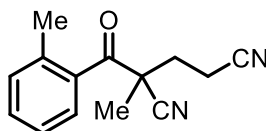

**2-Methyl-2-(2-methylbenzoyl)pentanedinitrile (52).** Synthesized according to the **General Procedure C** with *o*-tolylmethanol (0.2 mmol, 24.4 mg) and acrylonitrile (1.0 mmol, 53.0 mg) at 85 °C for 24 h. Purified by flash column chromatography on silica gel (PE:EA = 15:1) to give **52** as a colorless oil (22.6 mg, 50% yield).

$^1\text{H}$  NMR (400 MHz,  $\text{CDCl}_3$ )  $\delta$  7.75 – 7.73 (m, 1H), 7.46 – 7.42 (m, 1H), 7.33 – 7.30 (m, 2H), 2.63 – 2.54 (m, 3H), 2.38 (s, 3H), 2.23 – 2.13 (m, 1H), 1.72 (s, 3H).

$^{13}\text{C}$  NMR (100 MHz,  $\text{CDCl}_3$ )  $\delta$  197.3, 137.7, 135.4, 132.2, 132.1, 127.3, 125.7, 119.9, 118.0, 47.6, 33.3, 24.2, 20.7, 14.0.

HRMS (ESI): Calcd for  $[C_{14}H_{14}N_2ONa]^+ [M + Na]^+$  249.0998, Found 249.0989.

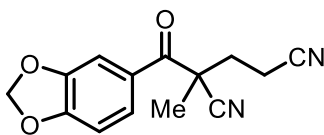

**2-(Benzo[d][1,3]dioxole-5-carbonyl)-2-methylpentanedinitrile (53).** Synthesized according to the **General Procedure C** with benzo[d][1,3]dioxol-5-ylmethanol (0.2 mmol, 30.4 mg) and acrylonitrile (1.0 mmol, 53.0 mg) at 85 °C for 12 h. Purified by flash column chromatography on silica gel (PE:EA = 6:1) to give **53** as a colorless oil (27.6 mg, 54% yield).

$^1H$  NMR (400 MHz,  $CDCl_3$ )  $\delta$  7.87 (dd,  $J$  = 8.4, 2.0 Hz, 1H), 7.55 (d,  $J$  = 1.6 Hz, 1H), 6.90 (d,  $J$  = 8.4 Hz, 1H), 6.08 (s, 2H), 2.66 – 2.48 (m, 3H), 2.15 (ddd,  $J$  = 15.2, 10.4, 4.4 Hz, 1H), 1.76 (s, 3H).

$^{13}C$  NMR (100 MHz,  $CDCl_3$ )  $\delta$  190.1, 153.1, 148.6, 127.6, 126.5, 120.7, 118.2, 109.4, 108.3, 102.5, 44.7, 33.7, 25.1, 13.9.

HRMS (ESI): Calcd for  $[C_{14}H_{13}N_2O_3]^+ [M + H]^+$  257.0921, Found 257.0929.

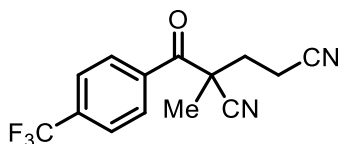

**2-Methyl-2-(4-(trifluoromethoxy)benzoyl)pentanedinitrile (54).** Synthesized according to the **General Procedure C** with (4-(trifluoromethoxy)phenyl)methanol (0.2 mmol, 35.2 mg) and acrylonitrile (1.0 mmol, 53.0 mg) at 85 °C for 12 h. Purified by flash column chromatography on silica gel (PE:EA = 6:1) to give **54** as a colorless oil (19.0 mg, 34% yield).

$^1H$  NMR (400 MHz,  $CDCl_3$ )  $\delta$  8.25 (d,  $J$  = 8.4 Hz, 2H), 7.81 (d,  $J$  = 8.4 Hz, 2H), 2.71 – 2.57 (m, 3H), 2.20 (ddd,  $J$  = 14.8, 10.0, 5.2 Hz, 1H), 1.81 (s, 3H).

$^{13}C$  NMR (100 MHz,  $CDCl_3$ )  $\delta$  192.0, 136.2, 135.7 (q,  $J$  = 32.6 Hz), 129.9, 126.2 (q,  $J$  = 3.6 Hz), 123.3 (q,  $J$  = 271.4 Hz), 119.9, 117.9, 45.4, 33.3, 24.7, 13.9.

$^{19}F$  NMR (376 MHz,  $CDCl_3$ )  $\delta$  –63.45.

HRMS (ESI): Calcd for  $[C_{14}H_{11}N_2OF_3Na]^+ [M + Na]^+$  303.0716, Found 303.0716.

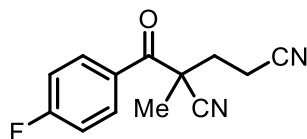

**2-(4-Fluorobenzoyl)-2-methylpentanedinitrile (55).** Synthesized according to the **General Procedure C** with (4-fluorophenyl)methanol (0.2 mmol, 25.2 mg) and acrylonitrile (1.0 mmol, 53.0 mg) at 85 °C for 12 h. Purified by flash column chromatography on silica gel (PE:EA = 6:1) to give **55** as a brown oil (25.8 mg, 56% yield).

$^1H$  NMR (400 MHz,  $CDCl_3$ )  $\delta$  8.23 – 8.19 (m, 2H), 7.23 – 7.18 (m, 2H), 2.68 – 2.51 (m, 3H), 2.17 (ddd,  $J$  = 14.8, 10.4, 4.8 Hz, 1H), 1.78 (s, 3H).

$^{13}C$  NMR (100 MHz,  $CDCl_3$ )  $\delta$  190.8, 166.5 (d,  $J$  = 256.7 Hz), 132.5 (d,  $J$  = 9.5 Hz), 129.7 (d,  $J$  = 2.9 Hz), 120.4, 118.1, 116.4 (d,  $J$  = 21.8 Hz), 45.0, 33.5, 24.8, 13.9.

$^{19}F$  NMR (376 MHz,  $CDCl_3$ )  $\delta$  –101.66.

HRMS (ESI): Calcd for  $[\text{C}_{13}\text{H}_{11}\text{N}_2\text{OFNa}]^+ [\text{M} + \text{Na}]^+$  253.0748, Found 253.0747.

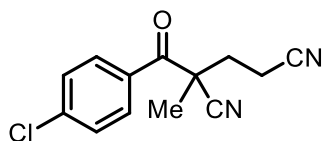

**2-(4-Chlorobenzoyl)-2-methylpentanedinitrile (56).** Synthesized according to the **General Procedure C** with (4-chlorophenyl)methanol (0.2 mmol, 28.4 mg) and acrylonitrile (1.0 mmol, 53.0 mg) at 85 °C for 12 h. Purified by flash column chromatography on silica gel (PE:EA = 6:1) to give **56** as a white jelly (22.6 mg, 46% yield).

$^1\text{H}$  NMR (400 MHz,  $\text{CDCl}_3$ )  $\delta$  8.10 (d,  $J$  = 8.8 Hz, 2H), 7.51 (d,  $J$  = 8.8 Hz, 2H), 2.68 – 2.55 (m, 3H), 2.17 (ddd,  $J$  = 14.8, 10.4, 4.8 Hz, 1H), 1.78 (s, 3H).

$^{13}\text{C}$  NMR (100 MHz,  $\text{CDCl}_3$ )  $\delta$  191.4, 141.4, 131.6, 131.0, 129.5, 120.2, 118.0, 45.1, 33.4, 24.8, 13.9.

HRMS (ESI): Calcd for  $[\text{C}_{13}\text{H}_{11}\text{N}_2\text{OCINa}]^+ [\text{M} + \text{Na}]^+$  269.0452, Found 269.0443.

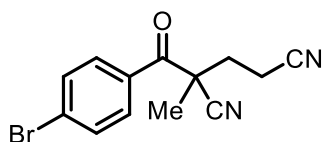

**2-(4-Bromobenzoyl)-2-methylpentanedinitrile (57).** Synthesized according to the **General Procedure C** with (4-bromophenyl)methanol (0.2 mmol, 37.2 mg) and acrylonitrile (1.0 mmol, 53.0 mg) at 85 °C for 12 h. Purified by flash column chromatography on silica gel (PE:EA = 6:1) to give **57** as a colorless oil (26.1 mg, 45% yield).

$^1\text{H}$  NMR (400 MHz,  $\text{CDCl}_3$ )  $\delta$  8.01 (d,  $J$  = 8.8 Hz, 2H), 7.67 (d,  $J$  = 8.4 Hz, 2H), 2.67 – 2.50 (m, 3H), 2.17 (ddd,  $J$  = 14.8, 10.4, 4.8 Hz, 1H), 1.77 (s, 3H).

$^{13}\text{C}$  NMR (100 MHz,  $\text{CDCl}_3$ )  $\delta$  191.6, 132.5, 132.0, 131.0, 130.2, 120.2, 118.0, 45.1, 33.4, 24.8, 13.9.

HRMS (ESI): Calcd for  $[\text{C}_{13}\text{H}_{11}\text{N}_2\text{OBrNa}]^+ [\text{M} + \text{Na}]^+$  312.9947, Found 312.9943.

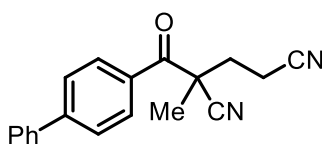

**2-([1,1'-Biphenyl]-4-carbonyl)-2-methylpentanedinitrile (58).** Synthesized according to the **General Procedure B** with [1,1'-biphenyl]-4-ylmethanol (0.2 mmol, 36.8 mg) and acrylonitrile (0.4 mmol, 21.2 mg). Then, another portion of acrylonitrile (0.6 mmol, 31.8 mg), was sequentially added into the Schlenk tube under  $\text{N}_2$  atmosphere. The reaction mixture was stirred at 85 °C for another 8 h. The mixture was then concentrated in *vacuo*. The crude product was purified by flash column chromatography on silica gel (PE:EA = 6:1) to give **58** as a white jelly (33.4 mg, 58% yield).

$^1\text{H}$  NMR (400 MHz,  $\text{CDCl}_3$ )  $\delta$  8.24 (d,  $J$  = 8.4 Hz, 2H), 7.74 (d,  $J$  = 8.4 Hz, 2H), 7.65 – 7.63 (m, 2H), 7.51 – 7.48 (m, 2H), 7.46 – 7.42 (m, 1H), 2.72 – 2.53 (m, 3H), 2.20 (ddd,  $J$  = 15.2, 10.4, 4.8 Hz, 1H), 1.82 (s, 3H).

$^{13}\text{C}$  NMR (100 MHz,  $\text{CDCl}_3$ )  $\delta$  191.8, 147.3, 139.3, 131.9, 130.2, 129.2, 128.9, 127.6, 127.4, 120.5, 118.2, 45.1, 33.6, 24.9, 13.9.

HRMS (ESI): Calcd for  $[\text{C}_{19}\text{H}_{16}\text{N}_2\text{ONa}]^+ [\text{M} + \text{Na}]^+$  311.1155, Found 311.1157.

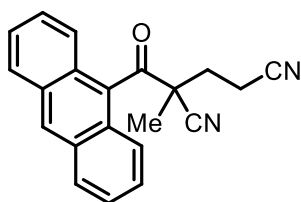

**2-(Anthracene-9-carbonyl)-2-methylpentanedinitrile (59).** Synthesized according to the **General Procedure C** with anthracene-9-carbaldehyde (0.2 mmol, 41.2 mg) and acrylonitrile (1.0 mmol, 53.0 mg) at 85 °C for 12 h. Purified by flash column chromatography on silica gel (PE:EA = 6:1) to give **59** as a brown jelly (31.2 mg, 50% yield).

$^1\text{H}$  NMR (400 MHz,  $\text{CDCl}_3$ )  $\delta$  8.60 (s, 1H), 8.09 (d,  $J$  = 8.0 Hz, 2H), 7.69 – 7.52 (m, 6H), 2.79 – 2.59 (m, 3H), 2.38 – 2.30 (m, 1H), 1.74 (s, 3H).

$^{13}\text{C}$  NMR (100 MHz,  $\text{CDCl}_3$ )  $\delta$  203.3, 131.4, 131.0, 130.3, 129.4, 127.9, 126.1, 126.1, 124.1, 119.3, 118.0, 50.2, 33.1, 23.1, 13.9.

HRMS (ESI): Calcd for  $[\text{C}_{21}\text{H}_{16}\text{N}_2\text{ONa}]^+ [\text{M} + \text{Na}]^+$  335.1155, Found 335.1154.

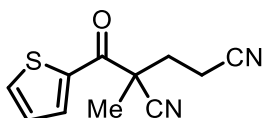

**2-Methyl-2-(thiophene-2-carbonyl)pentanedinitrile (60).** Synthesized according to the **General Procedure C** with thiophen-2-ylmethanol (0.2 mmol, 22.8 mg) and acrylonitrile (1.0 mmol, 53.0 mg) at 85 °C for 12 h. Purified by flash column chromatography on silica gel (PE:EA = 6:1) to give **60** as a yellow oil (24.0 mg, 55% yield).

$^1\text{H}$  NMR (400 MHz,  $\text{CDCl}_3$ )  $\delta$  8.24 (dd,  $J$  = 4.0, 0.8 Hz, 1H), 7.80 (dd,  $J$  = 4.8, 0.4 Hz, 1H), 7.21 (dd,  $J$  = 4.8, 4.0 Hz, 1H), 2.65 – 2.50 (m, 3H), 2.18 (ddd,  $J$  = 13.2, 7.2, 5.6 Hz, 1H), 1.79 (s, 3H).

$^{13}\text{C}$  NMR (100 MHz,  $\text{CDCl}_3$ )  $\delta$  184.9, 139.6, 136.9, 134.6, 129.0, 120.5, 118.1, 45.4, 33.3, 25.1, 13.8.

HRMS (ESI): Calcd for  $[\text{C}_{11}\text{H}_{10}\text{N}_2\text{OSNa}]^+ [\text{M} + \text{Na}]^+$  241.0406, Found 241.0405.

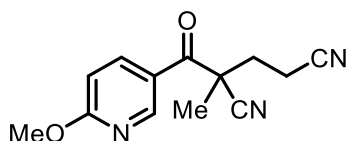

**2-(6-Methoxynicotinoyl)-2-methylpentanedinitrile (61).** Synthesized according to the **General Procedure C** with (6-methoxypyridin-3-yl)methanol (0.2 mmol, 27.8 mg) and acrylonitrile (1.0 mmol, 53.0 mg) at 85 °C for 12 h. Purified by flash column chromatography on silica gel (PE:EA = 10:1) to give **61** as a colorless oil (25.8 mg, 53% yield).

$^1\text{H}$  NMR (400 MHz,  $\text{CDCl}_3$ )  $\delta$  9.09 (d,  $J$  = 2.4 Hz, 1H), 8.29 (dd,  $J$  = 8.8, 2.8 Hz, 1H), 6.84 (d,  $J$  = 8.8 Hz, 1H), 4.03 (s, 3H), 2.67 – 2.50 (m, 3H), 2.16 (ddd,  $J$  = 14.8, 10.4, 4.4 Hz, 1H), 1.77 (s, 3H).

$^{13}\text{C}$  NMR (100 MHz,  $\text{CDCl}_3$ )  $\delta$  190.0, 167.4, 150.7, 139.4, 123.1, 120.3, 118.1, 111.7, 54.5, 44.9, 33.3, 24.7, 13.9.

HRMS (ESI): Calcd for  $[\text{C}_{13}\text{H}_{13}\text{N}_3\text{O}_2\text{Na}]^+ [\text{M} + \text{Na}]^+$  266.0900, Found 266.0909.

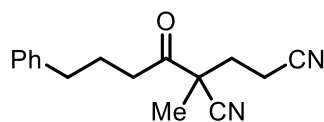

**2-Methyl-2-(4-phenylbutanoyl)pentanedinitrile (62).** Synthesized according to the **General Procedure C** with 4-phenylbutan-1-ol (0.2 mmol, 30.0 mg) and acrylonitrile (1.0 mmol, 53.0 mg) at 85 °C for 24 h. Purified by flash column chromatography on silica gel (PE:EA = 15:1) to give **62** as a colorless oil (31.0 mg, 61% yield).

$^1\text{H}$  NMR (400 MHz,  $\text{CDCl}_3$ )  $\delta$  7.32 – 7.28 (m, 2H), 7.23 – 7.21 (m, 1H), 7.19 – 7.16 (m, 2H), 2.82 (t,  $J$  = 6.4 Hz, 2H), 2.66 (t,  $J$  = 7.6 Hz, 2H), 2.50 – 2.31 (m, 3H), 2.05 – 1.94 (m, 3H), 1.50 (s, 3H).

$^{13}\text{C}$  NMR (100 MHz,  $\text{CDCl}_3$ )  $\delta$  202.7, 140.9, 128.7, 128.6, 126.4, 119.8, 117.8, 47.9, 38.9, 34.8, 32.0, 24.8, 23.3, 13.8.

HRMS (ESI): Calcd for  $[\text{C}_{16}\text{H}_{18}\text{N}_2\text{ONa}]^+ [\text{M} + \text{Na}]^+$  277.1311, Found 277.1305.

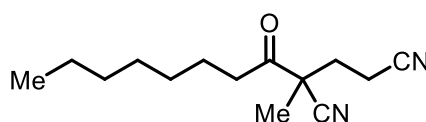

**2-Methyl-2-octanoylpentanedinitrile (63).** Synthesized according to the **General Procedure C** with octan-1-ol (0.2 mmol, 26 mg) and acrylonitrile (1.0 mmol, 53.0 mg) at 85 °C for 24 h. Purified by flash column chromatography on silica gel (PE:EA = 15:1) to give **63** as a brown oil (25.7 mg, 55% yield).

$^1\text{H}$  NMR (400 MHz,  $\text{CDCl}_3$ )  $\delta$  2.80 (t,  $J$  = 7.2 Hz, 2H), 2.51 – 2.34 (m, 3H), 2.04 – 1.96 (m, 1H), 1.64 – 1.60 (m, 2H), 1.53 (s, 3H), 1.29 – 1.24 (m, 7H), 0.89 – 0.86 (m, 4H).

$^{13}\text{C}$  NMR (100 MHz,  $\text{CDCl}_3$ )  $\delta$  203.0, 119.8, 117.9, 47.9, 39.9, 32.0, 31.7, 29.1, 29.0, 23.6, 23.2, 22.7, 14.1, 13.9.

HRMS (ESI): Calcd for  $[\text{C}_{14}\text{H}_{22}\text{N}_2\text{ONa}]^+ [\text{M} + \text{Na}]^+$  257.1624, Found 257.1632.

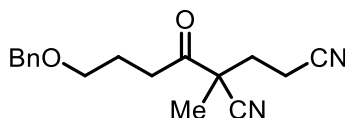

**2-(4-(Benzyloxy)butanoyl)-2-methylpentanedinitrile (64).** Synthesized according to the **General Procedure C** with 4-(benzyloxy)butan-1-ol (0.2 mmol, 36.0 mg) and acrylonitrile (1.0 mmol, 53.0 mg) at 85 °C for 24 h. Purified by flash column chromatography on silica gel (PE:EA = 15:1) to give **64** as a colorless oil (32.4 mg, 57% yield).

$^1\text{H}$  NMR (400 MHz,  $\text{CDCl}_3$ )  $\delta$  7.37 – 7.30 (m, 5H), 4.47 (s, 2H), 3.54 – 3.46 (m, 2H), 2.91 (t,  $J$  = 6.8 Hz, 2H), 2.40 – 2.26 (m, 3H), 2.04 – 1.91 (m, 3H), 1.49 (s, 3H).

$^{13}\text{C}$  NMR (100 MHz,  $\text{CDCl}_3$ )  $\delta$  202.7, 138.2, 128.6, 128.0, 128.0, 119.8, 118.0, 73.2, 68.8, 48.0, 36.6, 31.9, 24.0, 23.2, 13.7.

HRMS (ESI): Calcd for  $[\text{C}_{17}\text{H}_{21}\text{N}_2\text{O}_2]^+ [\text{M} + \text{H}]^+$  285.1598, Found 285.1600.

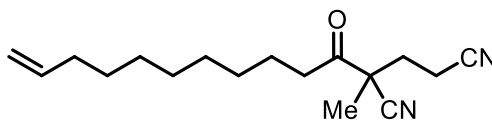

**2-Methyl-2-(undec-10-enoyl)pentanedinitrile (65).** Synthesized according to the **General Procedure C** with undec-10-en-1-ol (0.2 mmol, 34.0 mg) and acrylonitrile (1.0 mmol, 53.0 mg) at 85 °C for 24 h.

Purified by flash column chromatography on silica gel (PE:EA = 15:1) to give **65** as a colorless oil (37.3 mg, 68% yield).

$^1\text{H}$  NMR (400 MHz,  $\text{CDCl}_3$ )  $\delta$  5.85 – 5.75 (m, 1H), 5.01 – 4.91 (m, 2H), 2.80 (t,  $J = 7.2$  Hz, 2H), 2.55 – 2.34 (m, 3H), 2.06 – 1.96 (m, 3H), 1.63 – 1.58 (m, 2H), 1.53 (s, 3H), 1.35 – 1.25 (m, 10H).

$^{13}\text{C}$  NMR (100 MHz,  $\text{CDCl}_3$ )  $\delta$  203.0, 139.2, 119.8, 117.8, 114.3, 47.9, 39.8, 33.9, 31.9, 29.3, 29.1, 29.0, 23.6, 23.2, 13.9.

HRMS (ESI): Calcd for  $[\text{C}_{17}\text{H}_{26}\text{N}_2\text{ONa}]^+ [\text{M} + \text{Na}]^+$  297.1937, Found 297.1946.

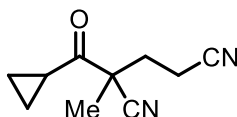

**2-(Cyclopropanecarbonyl)-2-methylpentanedinitrile (66).** Synthesized according to the **General Procedure C** with cyclopropylmethanol (0.2 mmol, 14.4 mg) and acrylonitrile (1.0 mmol, 53.0 mg) at 85 °C for 24 h. Purified by flash column chromatography on silica gel (PE:EA = 15:1) to give **66** as a colorless oil (25.7 mg, 73% yield).

$^1\text{H}$  NMR (400 MHz,  $\text{CDCl}_3$ )  $\delta$  2.50 – 2.34 (m, 4H), 2.07 – 1.99 (m, 1H), 1.59 (s, 3H), 1.22 – 1.11 (m, 4H).

$^{13}\text{C}$  NMR (100 MHz,  $\text{CDCl}_3$ )  $\delta$  202.6, 119.7, 117.9, 48.4, 31.6, 22.9, 18.0, 13.7, 13.6, 13.7.

HRMS (ESI): Calcd for  $[\text{C}_{10}\text{H}_{12}\text{N}_2\text{ONa}]^+ [\text{M} + \text{Na}]^+$  199.0842, Found 199.0834.

### Unsuccessful or less successful Substrates:

unsuccessful or less successful substrates for hydroacylation of acrylonitriles with aldehydes to  $\beta$ -ketonitriles:

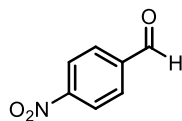

N.R.

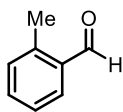

15%

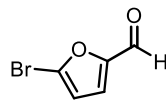

<5%

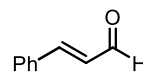

N.R.

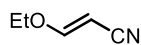

N.R.

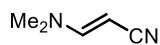

N.R.

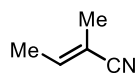

N.R.

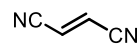

N.R.

unsuccessful or less successful substrates for hydroacylation of acrylonitriles with alcohols to  $\beta$ -ketonitriles:

poor selectivity of  $\beta$ -ketonitrile and glutaronitrile

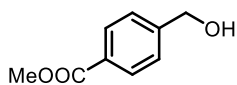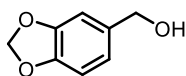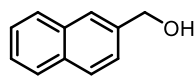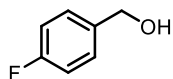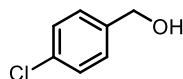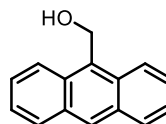

unsuccessful or less successful substrates for cross-coupling of acrylonitrile with alcohols to glutaronitriles:

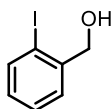

N.R.

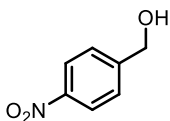

N.R.

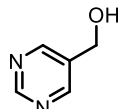

N.R.

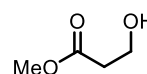

N.R.

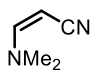

N.R.

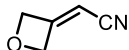

N.R.

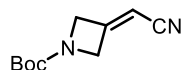

N.R.

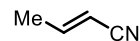

$\beta$ -ketonitrile product

## V Synthetic Transformations of $\beta$ -Ketonitrile and Glutaronitrile Derivatives

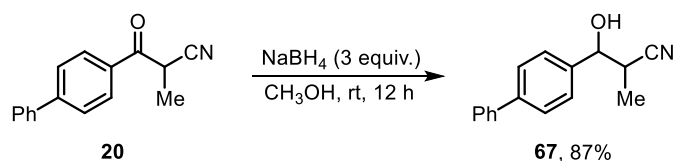

To a solution of  $\beta$ -ketonitrile **20** (0.2 mmol, 47.0 mg) in  $\text{CH}_3\text{OH}$  (5 mL) was added  $\text{NaBH}_4$  (0.6 mmol, 22.7 mg), and the resulting mixture was stirred at room temperature for 12 h. Then the reaction was quenched with  $\text{H}_2\text{O}$  (2 mL). The resulting mixture was added DCM (10 mL), partitioned between  $\text{H}_2\text{O}$  and DCM, and then separated. The aqueous layer was extracted with DCM for three times (5 mL  $\times$  3). The combined organic layers were dried over  $\text{Na}_2\text{SO}_4$ , filtered, and concentrated under reduced pressure. The resulting residue was purified by flash column chromatography on silica gel (PE:EA) to give **67** as a white jelly (41.2 mg, 87% yield, d.r. = 1.2:1.).

$^1\text{H}$  NMR (400 MHz,  $\text{CDCl}_3$ ): *Major isomer*:  $\delta$  7.64 – 7.58 (m, 4H), 7.50 – 7.44 (m, 4H), 7.36 (dd,  $J$  = 7.6, 7.6 Hz, 1H), 4.78 (d,  $J$  = 6.4 Hz, 1H), 3.01 – 2.94 (m, 1H), 2.34 (s, 1H), 1.29 (d,  $J$  = 8.8 Hz, 3H); *Minor isomer*: 7.64 – 7.58 (m, 4H), 7.50 – 7.44 (m, 4H), 7.36 (dd,  $J$  = 7.6, 7.6 Hz, 1H), 4.87 (d,  $J$  = 6.4 Hz, 1H), 3.10 – 3.03 (m, 1H), 2.34 (s, 1H), 1.29 (d,  $J$  = 8.8 Hz, 3H).

$^{13}\text{C}$  NMR (100 MHz,  $\text{CDCl}_3$ )  $\delta$  142.0, (141.9), 140.6, (140.5), 139.1, (138.8), 129.0, 127.7, (127.7), 127.6, 127.5, 127.2, 127.0, 126.9, 121.1, (121.1), 75.1, (74.4), 34.7, (34.1), 14.9, 13.7.

HRMS (ESI): Calcd for  $[\text{C}_{16}\text{H}_{16}\text{NO}]^+ [\text{M}+\text{H}]^+$  238.1226, Found 238.1220.

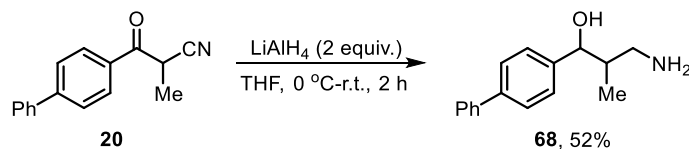

To a solution of  $\beta$ -ketonitrile **20** (0.2 mmol, 47.0 mg) in dry THF (10 mL) was added  $\text{LiAlH}_4$  (0.4 mmol, 15.2 mg), and the resulting mixture was stirred for 2 h from 0  $^\circ\text{C}$  to room temperature. Then the reaction was quenched with  $\text{H}_2\text{O}$  (2 mL). The resulting mixture was added DCM (10 mL). After separation, the aqueous layer was extracted with DCM for three times (5 mL  $\times$  3). The combined organic layers were dried over  $\text{Na}_2\text{SO}_4$ , filtered, and concentrated under reduced pressure. The resulting residue was purified by flash column chromatography on silica gel (PE:EA) to give **68** as a white jelly (25.0 mg, 52% yield, d.r. = 2:1.).

$^1\text{H}$  NMR (400 MHz,  $\text{CDCl}_3$ ) *Major isomer*:  $\delta$  7.62 – 7.52 (m, 4H), 7.47 – 7.37 (m, 4H), 7.33 (dd,  $J$  = 7.2, 7.2 Hz, 1H), 4.53 (d,  $J$  = 8.4 Hz, 1H), 4.37 (s, 3H), 3.14 – 2.73 (m, 2H), 1.91– 1.87 (m, 1H), 0.73 (d,  $J$  = 6.4 Hz, 3H). *Minor isomer*: 7.62 – 7.52 (m, 4H), 7.47 – 7.37 (m, 4H), 7.33 (dd,  $J$  = 7.2, 7.2 Hz, 1H), 5.00 (d,  $J$  = 2.8 Hz, 1H), 4.37 (s, 3H), 3.06 (d,  $J$  = 7.2 Hz, 2H), 1.91– 1.87 (m, 1H), 0.81 (d,  $J$  = 7.2 Hz, 3H).

$^{13}\text{C}$  NMR (100 MHz,  $\text{CDCl}_3$ )  $\delta$  143.4, 142.4, 141.1, 140.2, 139.7, 128.8, 127.4, 127.2, 127.2, 127.1, 127.1, 127.0, 126.8, 126.7, 81.2, 76.6, 47.3, 45.5, 40.4, 39.9, 15.5, 11.7.

HRMS (ESI): Calcd for  $[\text{C}_{16}\text{H}_{18}\text{NO}]^+ [\text{M}+\text{H}]^+$  240.1383, Found 240.1390.

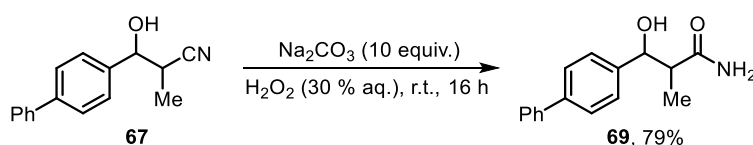

To a solution of **67** (0.2 mmol, 47.4 mg) in acetone (2 mL) were successively added 30% aqueous  $\text{H}_2\text{O}_2$

solution (2 mL) and Na<sub>2</sub>CO<sub>3</sub> (2.0 mmol, 212 mg), and the resulting suspension was stirred for 16 h at room temperature. After dilution with H<sub>2</sub>O (5 mL), the resulting mixture was added DCM (10 mL), partitioned between H<sub>2</sub>O and DCM. The aqueous layer was extracted with DCM for three times (5 mL × 3). The organic layers were collected, dried over Na<sub>2</sub>SO<sub>4</sub>, filtered, and concentrated under reduced pressure. The resulting residue was purified by flash column chromatography on silica gel (PE:EA) to give **69** as a white jelly (40.3 mg, 79% yield, d.r. = 2:1).<sup>6</sup>

<sup>1</sup>H NMR (400 MHz, CDCl<sub>3</sub>) *Major isomer*: δ 7.60 – 7.59 (m, 4H), 7.45 – 7.41 (m, 4H), 7.34 (dd, *J* = 7.6, 7.6 Hz, 1H), 5.81 (s, 1H), 5.52 (s, 1H), 5.15 (d, *J* = 3.2 Hz, 1H), 3.68 (s, 1H), 2.68 – 2.62 (m, 1H), 1.16 (d, *J* = 7.2 Hz, 3H). *Minor isomer*: δ 7.60 – 7.58 (m, 4H), 7.47 – 7.40 (m, 4H), 7.35 (dd, *J* = 7.6, 7.2 Hz, 1H), 5.73 (s, 1H), 5.40 (s, 1H), 4.80 (dd, *J* = 6.8, 4.4 Hz, 1H), 3.54 (d, *J* = 4.4 Hz, 1H), 2.66 (dq, *J* = 3.2, 6.8 Hz, 1H), 1.16 (d, *J* = 7.2 Hz, 3H).

<sup>13</sup>C NMR (100 MHz, DMSO-*d*<sub>6</sub>) *Major isomer* δ 176.2, 143.5, 140.1, 138.5, 128.8, 127.2, 127.0, 126.5, 125.9, 73.5, 47.1, 13.5. *Minor isomer*: δ 176.6, 143.3, 134.0, 138.8, 128.8, 127.3, 127.2, 126.5, 126.2, 74.7, 47.0, 14.8.

HRMS (ESI): Calcd for [C<sub>16</sub>H<sub>17</sub>NO<sub>2</sub>]<sup>+</sup> [M+Na]<sup>+</sup> 278.1151, Found 278.1152.

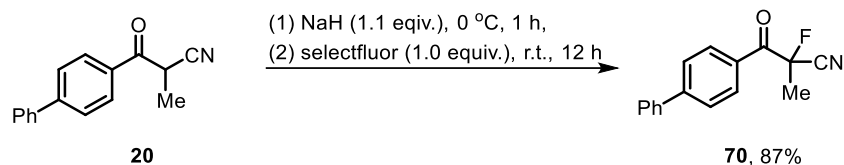

To a solution of **20** (0.2 mmol, 47.0 mg) in dry THF (2 mL) were added NaH (0.22 mmol, 8.8 mg, 60% in oil) under N<sub>2</sub> atmosphere, and the resulting suspension was stirred for 1 h at 0 °C. Then the selectfluor (0.22 mmol, 80.0 mg,) was added to the resulting mixture, and the mixture was stirred for another 12 h from 0 °C to room temperature. Then the reaction was quenched with H<sub>2</sub>O (2 mL). The resulting mixture was added EA (10 mL). After separation, the aqueous layer was extracted with EA for three times (5 mL × 3). The combined organic layers were dried over Na<sub>2</sub>SO<sub>4</sub>, filtered, and concentrated under reduced pressure. The resulting residue was purified by flash column chromatography on silica gel (PE:EA) to give **70** as a white jelly (44.1 mg, 87% yield).

<sup>1</sup>H NMR (400 MHz, CDCl<sub>3</sub>) δ 8.21 (dd, *J* = 8.8, 1.2 Hz, 2H), 7.75 (d, *J* = 8.4 Hz, 2H), 7.66 – 7.64 (m, 2H), 7.52 – 7.48 (m, 2H), 7.46 – 7.43 (m, 1H), 2.11 (d, *J* = 22.0 Hz, 3H).

<sup>13</sup>C NMR (100 MHz, CDCl<sub>3</sub>) δ 188.0 (d, *J* = 23.9 Hz), 147.81, 139.36, 131.0 (d, *J* = 5.5 Hz), 130.3 (d, *J* = 3.5 Hz), 129.2, 128.9, 127.7, 127.5, 115.9 (d, *J* = 23.1 Hz), 89.5 (d, *J* = 194.0 Hz), 23.9 (d, *J* = 24.0 Hz).

<sup>19</sup>F NMR (376 MHz, CDCl<sub>3</sub>) δ -146.22.

HRMS (ESI): Calcd for [C<sub>16</sub>H<sub>12</sub>NOFNa]<sup>+</sup> [M+Na]<sup>+</sup> 276.0795, Found 276.0791.

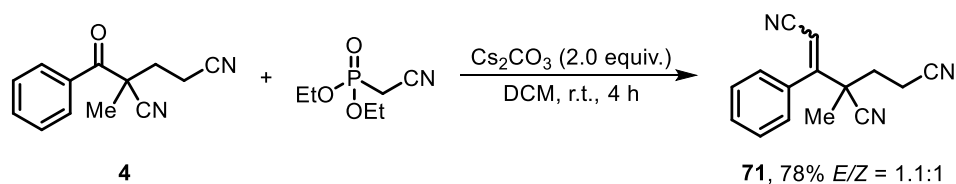

To a solution of Glutaronitrile **4** (0.2 mmol, 42.4 mg) in DCM (5 mL) was successively added diethyl (cyanomethyl)phosphonate (0.3 mmol, 53.1 mg) and Cs<sub>2</sub>CO<sub>3</sub> (0.4 mmol, 130.3 mg), then the resulting

mixture was stirred at room temperature for 4 h. The reaction was quenched with H<sub>2</sub>O (2 mL). The resulting mixture was added DCM (10 mL), partitioned between H<sub>2</sub>O and DCM, and then separated. The aqueous layer was extracted with DCM for three times (5 mL × 3). The combined organic layers were dried over Na<sub>2</sub>SO<sub>4</sub>, filtered, and concentrated under reduced pressure. The resulting residue was purified by flash column chromatography on silica gel (PE:EA) to give **71** as a colorless jelly (36.7 mg, 78% yield, *E/Z* = 1.1:1).

*Major isomer* <sup>1</sup>H NMR (400 MHz, CDCl<sub>3</sub>) δ 7.49 – 7.41 (m, 3H), 7.28 – 7.22 (m, 2H), 5.62 (s, 1H), 2.78 – 2.67 (m, 1H), 2.66 – 2.56 (m, 2H), 2.38 (ddd, *J* = 15.2, 10.0, 6.4 Hz, 1H), 1.93 (s, 3H)

<sup>13</sup>C NMR (100 MHz, CDCl<sub>3</sub>) δ 161.4, 137.6, 130.3, 128.9, 127.4, 119.7, 117.7, 114.6, 101.7, 43.2, 34.8, 25.9, 14.1.

HRMS (ESI): Calcd for [C<sub>15</sub>H<sub>14</sub>N<sub>3</sub>]<sup>+</sup> [M+H]<sup>+</sup> 236.1182, Found 236.1172.

*Minor isomer* <sup>1</sup>H NMR (400 MHz, CDCl<sub>3</sub>) δ 7.51 – 7.49 (m, 3H), 7.19 – 7.17 (m, 2H), 6.05 (s, 1H), 2.63 – 2.50 (m, 2H), 2.13 – 2.00 (m, 2H), 1.57 (s, 3H).

<sup>13</sup>C NMR (100 MHz, CDCl<sub>3</sub>) δ 161.0, 132.6, 130.3, 129.3, 128.2, 119.5, 117.6, 114.9, 103.4, 43.6, 33.5, 24.5, 13.8.

HRMS (ESI): Calcd for [C<sub>15</sub>H<sub>14</sub>N<sub>3</sub>]<sup>+</sup> [M+H]<sup>+</sup> 236.1182, Found 236.1173.

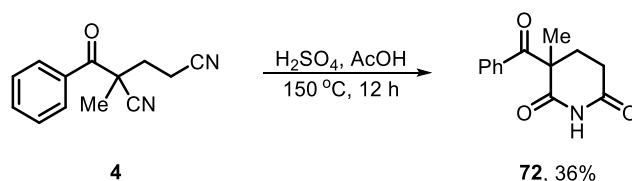

Glutaronitrile **4** (0.2 mmol, 42.4 mg), concentrated H<sub>2</sub>SO<sub>4</sub> (0.6 mL) and AcOH (1.0 mL) were successively added into a Schlenk reaction tube under an air atmosphere. The mixture was heated at 150 °C for 12 h. after the reaction completed, the resulting dark-brown liquid was poured into crushed ice and extracted with DCM for three times (10 mL × 3). The organic layer was repeatedly washed with a saturated Na<sub>2</sub>CO<sub>3</sub> solution, dried over Na<sub>2</sub>SO<sub>4</sub>, filtered, and concentrated under reduced pressure. The resulting residue was purified by flash column chromatography on silica gel (PE:EA) to give **72** as a colorless jelly (16.7 mg, 36% yield).

<sup>1</sup>H NMR (400 MHz, CDCl<sub>3</sub>) δ 8.13 (s, 1H), 7.86 (d, *J* = 8.0 Hz, 2H), 7.55 (dd, *J* = 8.0, 8.0 Hz, 1H), 7.43 (dd, *J* = 8.0, 8.0 Hz, 2H), 2.74 – 2.68 (m, 3H), 1.95 – 1.86 (m, 1H), 1.71 (s, 3H).

<sup>13</sup>C NMR (100 MHz, CDCl<sub>3</sub>) δ 197.6, 173.8, 171.8, 135.2, 133.3, 129.0, 128.8, 54.8, 29.8, 29.2, 21.9.

HRMS (ESI): Calcd for [C<sub>13</sub>H<sub>14</sub>NO<sub>3</sub>]<sup>+</sup> [M+H]<sup>+</sup> 232.0968, Found 232.0961.

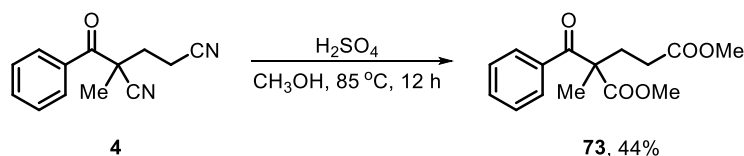

Glutaronitrile **4** (0.2 mmol, 42.4 mg), CH<sub>3</sub>OH (2.0 mL) and concentrated H<sub>2</sub>SO<sub>4</sub> (1.0 mL) were successively added into a Schlenk reaction tube under an air atmosphere. The mixture was heated at 85 °C for 12 h, Then the reaction was quenched with a saturated Na<sub>2</sub>CO<sub>3</sub> solution and extracted with DCM for three times (5 mL × 3). The combined organic layers were dried over Na<sub>2</sub>SO<sub>4</sub>, filtered, and concentrated under reduced pressure. The resulting residue was purified by flash column chromatography on silica gel (PE:EA) to give **73** as a colorless oil (24.5 mg, 44% yield).

$^1\text{H}$  NMR (400 MHz,  $\text{CDCl}_3$ )  $\delta$  7.81–7.79 (m, 2H), 7.55–7.51 (m, 1H), 7.44–7.40 (m, 2H), 3.65 (s, 3H), 3.64 (s, 3H), 2.44–2.24 (m, 4H), 1.53 (s, 3H).

$^{13}\text{C}$  NMR (100 MHz,  $\text{CDCl}_3$ )  $\delta$  196.8, 174.4, 173.4, 135.3, 133.0, 128.8, 128.6, 56.2, 52.7, 51.9, 31.5, 29.3, 21.3.

HRMS (ESI): Calcd for  $[\text{C}_{15}\text{H}_{18}\text{O}_5\text{Na}]^+ [\text{M} + \text{Na}]^+$  301.1046, Found 301.1056.

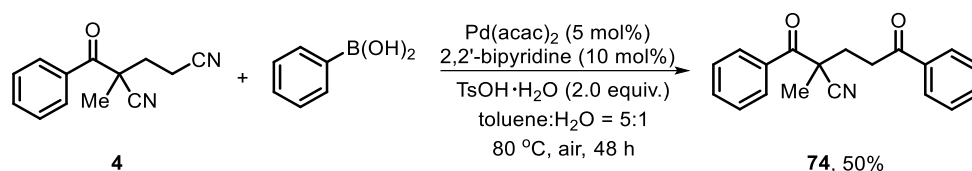

Glutaronitrile **4** (0.4 mmol, 84.8 mg), phenylboronic acid (0.2 mmol, 24.4 mg),  $\text{Pd}(\text{acac})_2$  (0.01 mmol, 3.1 mg), 2,2'-bipyridine (0.02 mmol, 3.1 mg),  $\text{TsOH} \cdot \text{H}_2\text{O}$  (0.4 mmol, 76.1 mg), toluene (2 mL) and  $\text{H}_2\text{O}$  (0.4 mL) were successively added into a Schlenk reaction tube under an air atmosphere. and the resulting mixture was stirred at 85 °C for 12 h. The resulting mixture was poured into ethyl acetate, which was washed with saturated  $\text{NaHCO}_3$  solution (10 mL) and brine (10 mL). After the aqueous layer was extracted with ethyl acetate for three times (5 mL  $\times$  3), the combined organic layers were dried over  $\text{Na}_2\text{SO}_4$ , filtered, and concentrated under reduced pressure. The resulting residue was purified by flash column chromatography on silica gel (PE:EA) to give **74** as a colorless oil (29.1 mg, 50% yield).

$^1\text{H}$  NMR (400 MHz,  $\text{CDCl}_3$ )  $\delta$  8.20–8.17 (m, 2H), 7.97–7.94 (m, 2H), 7.66–7.45 (m, 6H), 3.29–3.12 (m, 2H), 2.70 (ddd,  $J = 15.6, 10.4, 5.2$  Hz, 1H), 2.32 (ddd,  $J = 16.0, 10.8, 5.2$  Hz, 1H), 1.80 (s, 3H).

$^{13}\text{C}$  NMR (100 MHz,  $\text{CDCl}_3$ )  $\delta$  197.9, 193.9, 136.6, 134.1, 134.1, 133.6, 129.5, 129.0, 128.8, 128.2, 121.8, 45.6, 34.5, 32.5, 24.6.

HRMS (ESI): Calcd for  $[\text{C}_{19}\text{H}_{17}\text{NO}_2\text{Na}]^+ [\text{M} + \text{Na}]^+$  314.1151, Found 314.1142.

## VI Control Experiments and Mechanistic Studies

### (1) Control Experiment with $\beta$ -Hydroxynitrile as an Additive

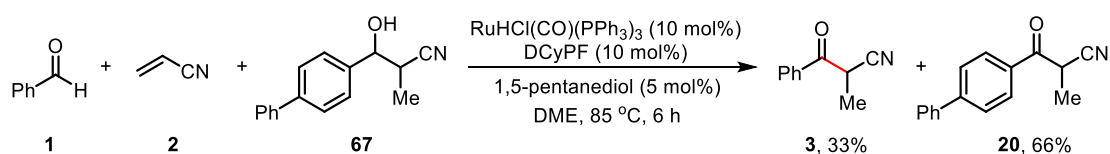

According to the **General Procedure A** with benzaldehyde **1** (0.3 mmol, 31.8 mg) and acrylonitrile **2** (10.6 mg, 0.2 mmol) as substrates. The  $\beta$ -hydroxynitrile **67** (47.4 mg, 0.2 mmol) was added as an additive. After reaction for 6 h, the  $\beta$ -ketonitrile **20** was obtained in 66% NMR yield and **3** was obtained in 33% NMR yield. The results might suggest a process of  $\beta$ -hydride elimination from alkoxy ruthenium species and  $\beta$ -hydroxynitrile should be the reaction intermediate in this hydroacylation reaction.

### (2) Deuterium Labelling Experiment

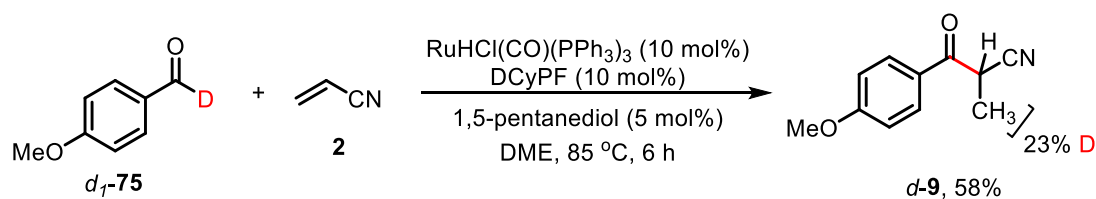

According to the **General Procedure A** with deuterated *para*-methoxybenzaldehyde (*d*<sub>1</sub>-75) (0.3 mmol, 41.0 mg) and acrylonitrile **2** (10.6 mg, 0.2 mmol) as substrates. The reaction mixture was concentrated under reduced pressure, which was purified by flash column chromatography on silica gel (PE:EA) to give *d*-9 in 58% isolated yield. <sup>1</sup>H NMR analysis revealed that deuterium was incorporated into only the β'-position of the resulting β-ketonitrile product.

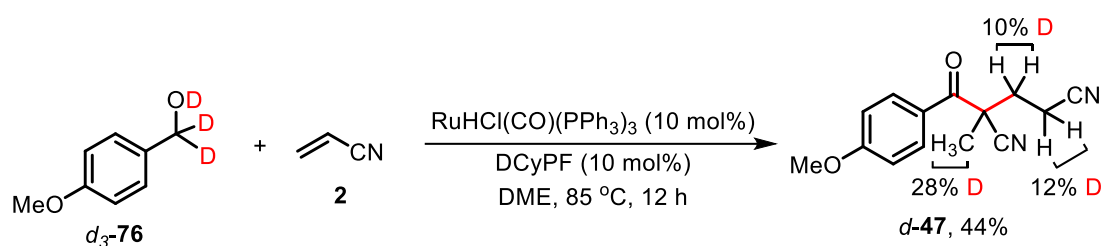

According to the **General Procedure B** with deuterated *para*-methoxyphenylmethanol *d*<sub>3</sub>-76 (0.2 mmol, 22.2 mg) and acrylonitrile **2** (53.0 mg, 1.0 mmol) as substrates. The reaction mixture was concentrated under reduced pressure, which was purified by flash column chromatography on silica gel (PE:EA) to give *d*-47 in 44% isolated yield. <sup>1</sup>H NMR analysis revealed that deuterium was incorporated into only the β'-position of the resulting β-ketonitrile product.

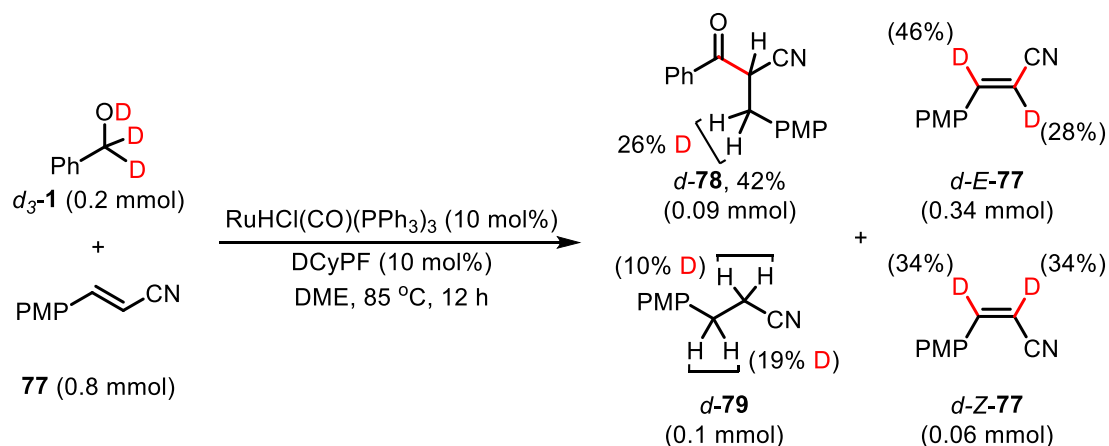

According to the **General Procedure B** with deuterated *para*-methoxyphenylmethanol *d*<sub>3</sub>-1 (0.2 mmol, 28.2 mg) and *para*-OMe-substituted cinnamionitrile **77** (103.2 mg, 0.8 mmol) as substrates. The reaction mixture was concentrated under reduced pressure, which was purified by flash column chromatography on silica gel (PE:EA) to give *d*-78 in 42% isolated yield with deuterated 3-(4-methoxyphenyl)propanenitrile as alkene hydrogenation product. <sup>1</sup>H NMR analysis revealed that deuterium was incorporated into only the β'-position of the resulting β-ketonitrile product. Moreover, we recovered the deuterated cinnamionitrile *d*-E-77 and *d*-Z-77 after the cross-coupling reaction. These results clearly indicate the reversibility of hydrometallation of acrylonitrile with Ru–H complex.

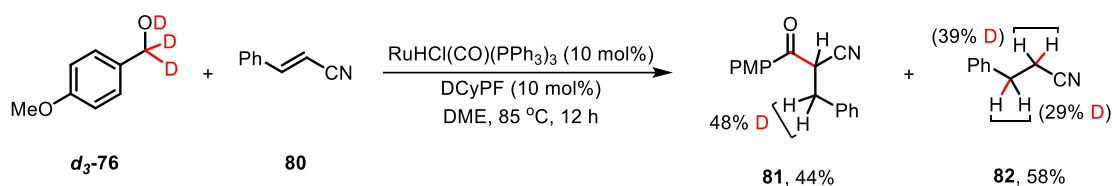

According to the **General Procedure B** with deuterated *para*-methoxyphenylmethanol  $d_3\text{-76}$  (0.2 mmol, 28.2 mg) and cinnamionitrile **80** (51.6 mg, 0.4 mmol) as substrates. The reaction mixture was concentrated under reduced pressure, which was purified by flash column chromatography on silica gel (PE:EA) to give **81** in 44% isolated yield with deuterated 3-phenylpropanenitrile as alkene hydrogenation product.  $^1\text{H}$  NMR analysis revealed that deuterium was incorporated into only the  $\beta$ -position of the resulting  $\beta$ -ketonitrile product, while deuterium was incorporated into both the  $\alpha$  and  $\beta$  position of alkene hydrogenation product. These results clearly indicate the reversibility of hydrometallation of acrylonitrile with Ru–H complex.

### (3) Control Experiments toward Pentanedinitrile Product **4**

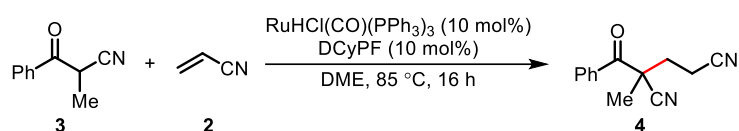

| Entry | Variations from above conditions                     | Yield (%) <sup>b</sup> |
|-------|------------------------------------------------------|------------------------|
| 1     | none                                                 | 90                     |
| 2     | without Ru cat./DCyPF                                | 0                      |
| 3     | without Ru cat.                                      | 0                      |
| 4     | without DCyPF                                        | 50                     |
| 5     | without Ru cat./DCyPF, with 20 mol% PPh <sub>3</sub> | 0                      |
| 6     | with 5 mol% pentane-1,5-diol                         | 57                     |
| 7     | with 1 equiv pentane-1,5-diol                        | <5                     |

<sup>a</sup>Reaction conditions: **3** (0.2 mmol), **2** (1.0 equiv), RuHCl(CO)(PPh<sub>3</sub>)<sub>3</sub> (10 mol%), DCyPF (10 mol%), DME (2 mL), 85 °C, 16 h, if otherwise noted. <sup>b</sup>Isolated yield.

## VII References

- Metternich J. B.; Artiukhin, D. G.; Holland, M. C.; von Bremen-Kühne, M.; Neugebauer, J.; and Gilmour, R. *J. Org. Chem.* **2017**, *82*, 9955 – 9977.
- Kiyokawa, K.; Nagata, T.; Minakata, S. *Angew. Chem. Int. Ed.* **2016**, *55*, 10458 – 10462.
- Erbing, E.; Vázquez-Romero, A.; Bermejo Gómez, A.; Platero-Prats, A. E.; Carson, F.; Zou, X.; Tolstoy, P.; Martín-Matute, B. *Chem. Eur. J.* **2016**, *22*, 15659 – 15663.
- Amatore, M.; Gosmini, C.; Périchon, J. *J. Org. Chem.* **2006**, *71*, 6130 – 6134.
- Meng, J.-J.; Gao, M.; Dong, M.; Wei, Y.-P.; Zhang, W.-Q. *Tetrahedron Lett.* **2014**, *55*, 2107 – 2109.
- Saito, A.; Adachi, S.; Kumagai, N.; Shibasaki, M. *Angew. Chem. Int. Ed.* **2021**, *60*, 8739 – 8743.

## VII NMR Spectra

### <sup>1</sup>H NMR (400 MHz, CDCl<sub>3</sub>) spectrum of 2-Methyl-3-oxo-3-phenylpropanenitrile (3)

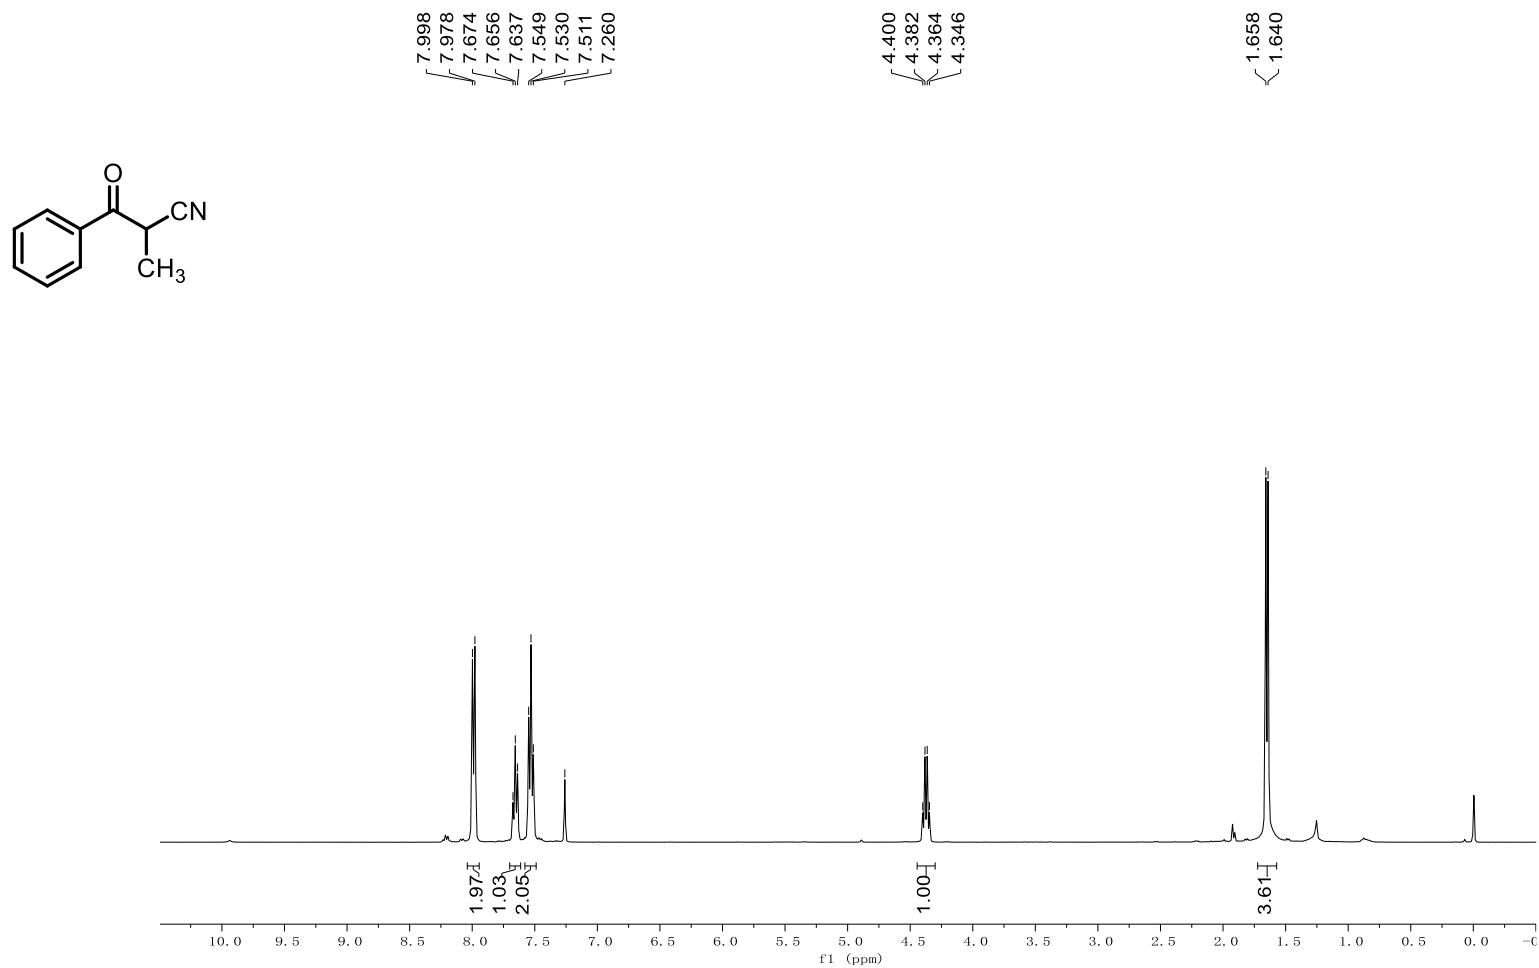

<sup>1</sup>H NMR (400 MHz, CDCl<sub>3</sub>) spectrum of 2-Benzoyl-2-methylpentanedinitrile (4)

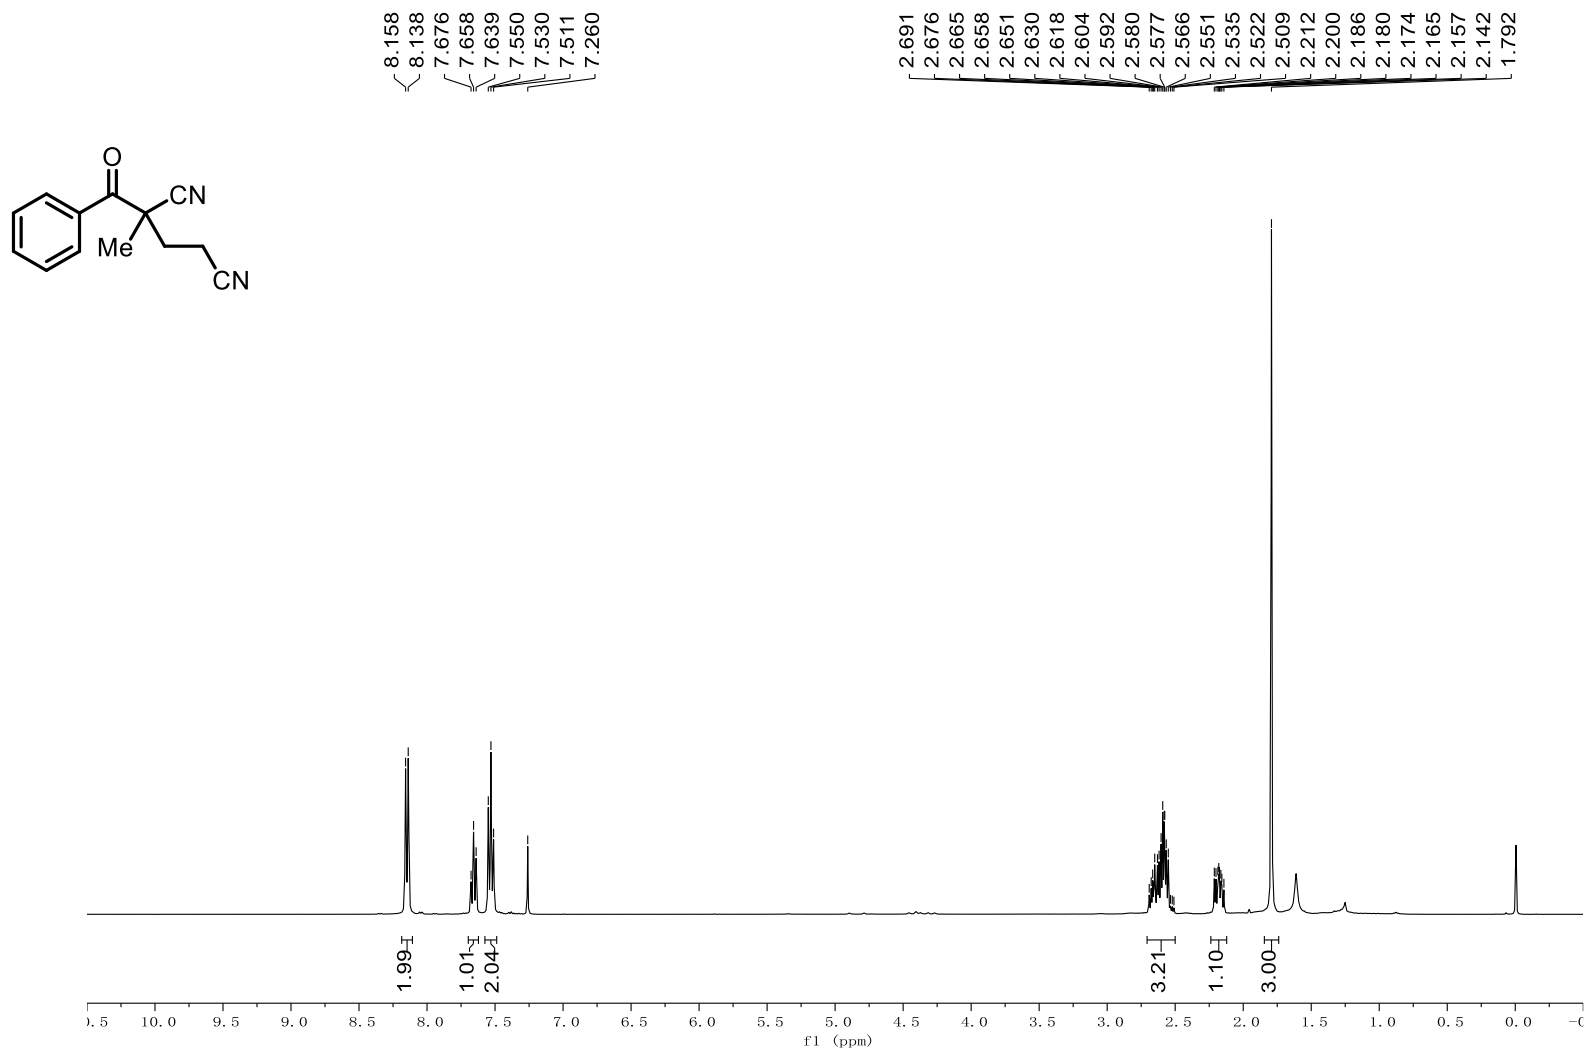

**<sup>13</sup>C NMR (100 MHz, CDCl<sub>3</sub>) spectrum of 2-Benzoyl-2-methylpentanedinitrile (4)**

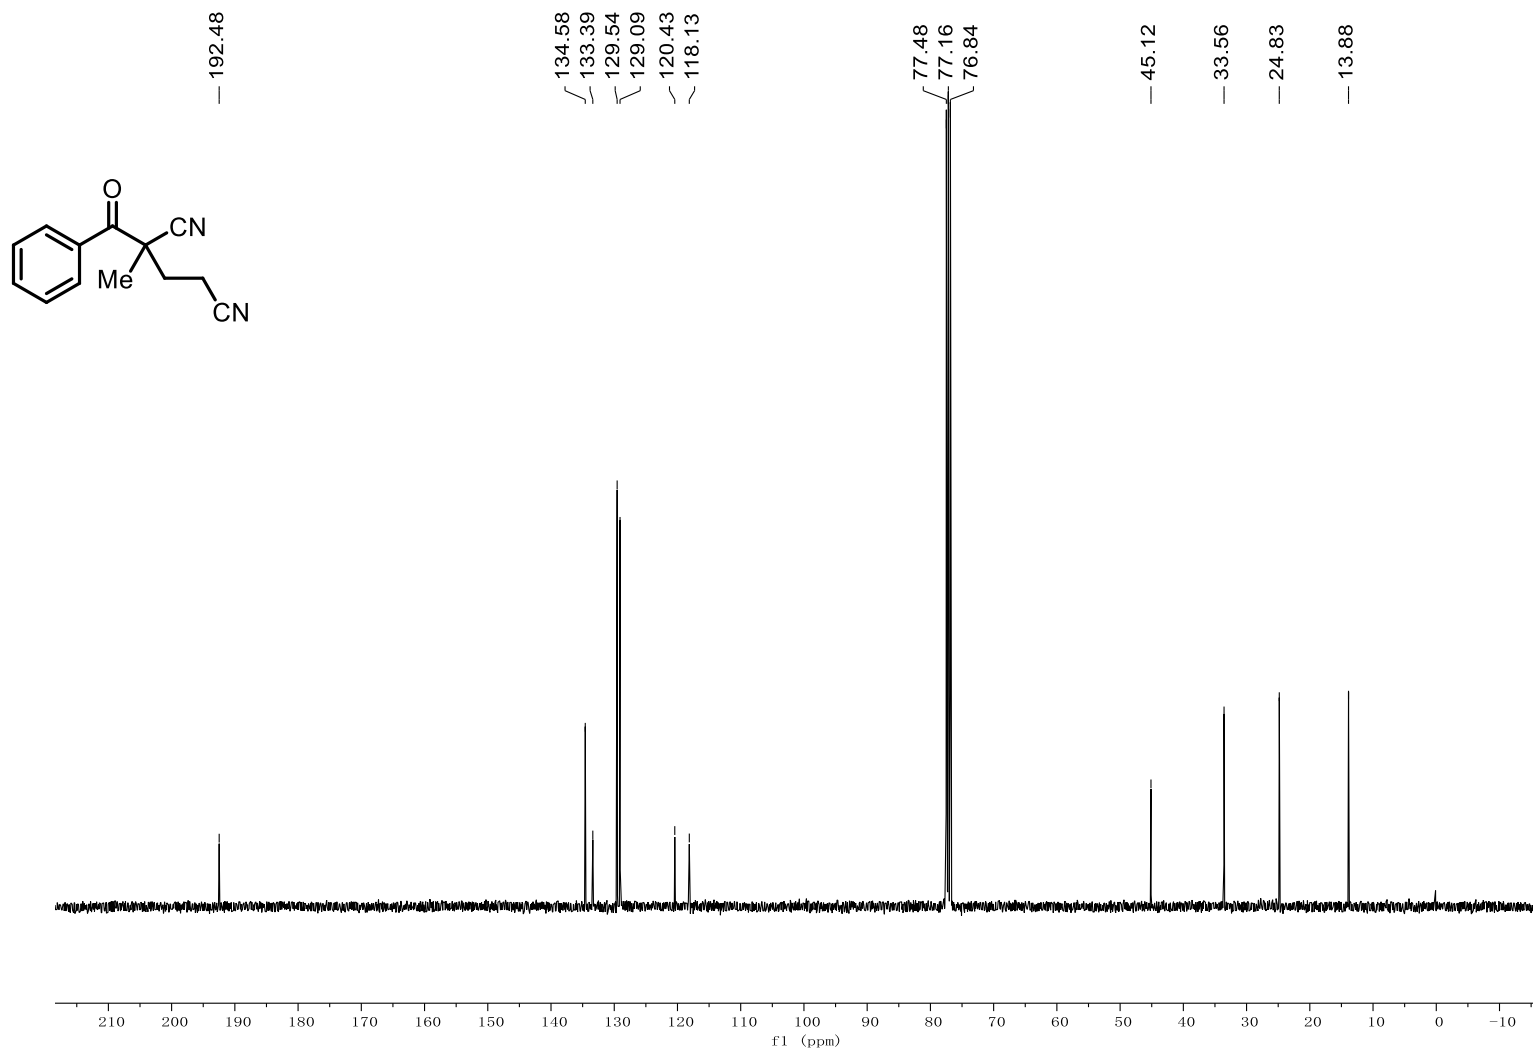

**<sup>1</sup>H NMR (400 MHz, CDCl<sub>3</sub>) spectrum of 2-Methyl-3-oxo-3-(*p*-tolyl)propanenitrile (6)**

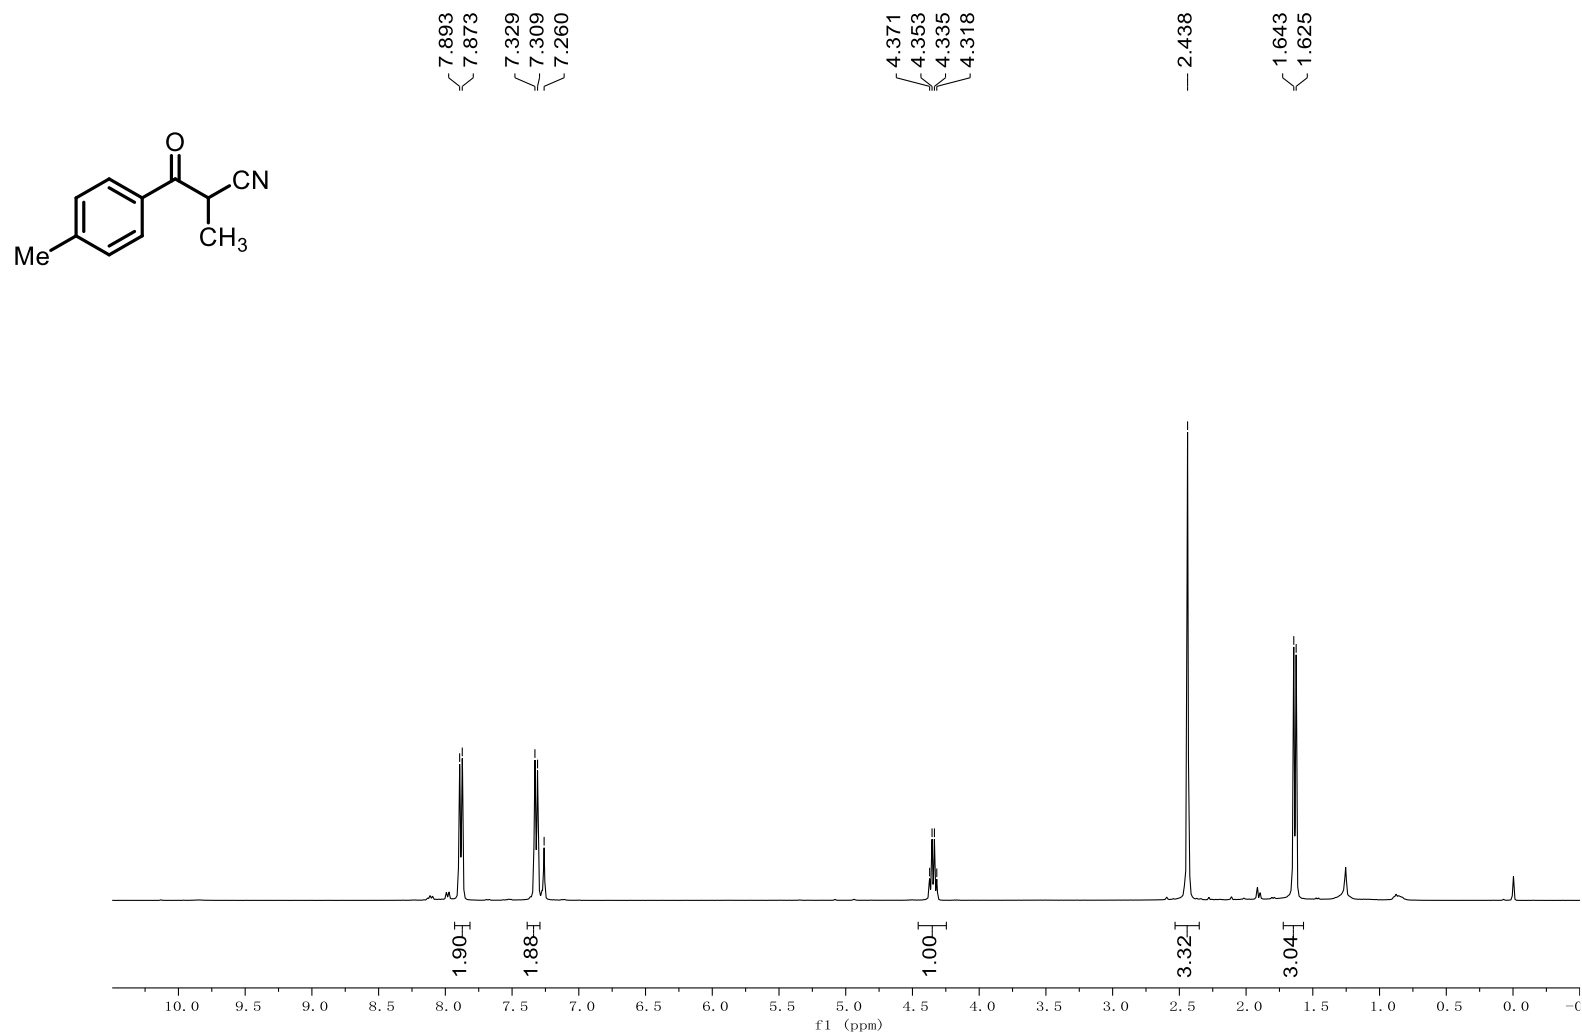

<sup>13</sup>C NMR (100 MHz, CDCl<sub>3</sub>) spectrum of 2-Methyl-3-oxo-3-(*p*-tolyl)propanenitrile (6)

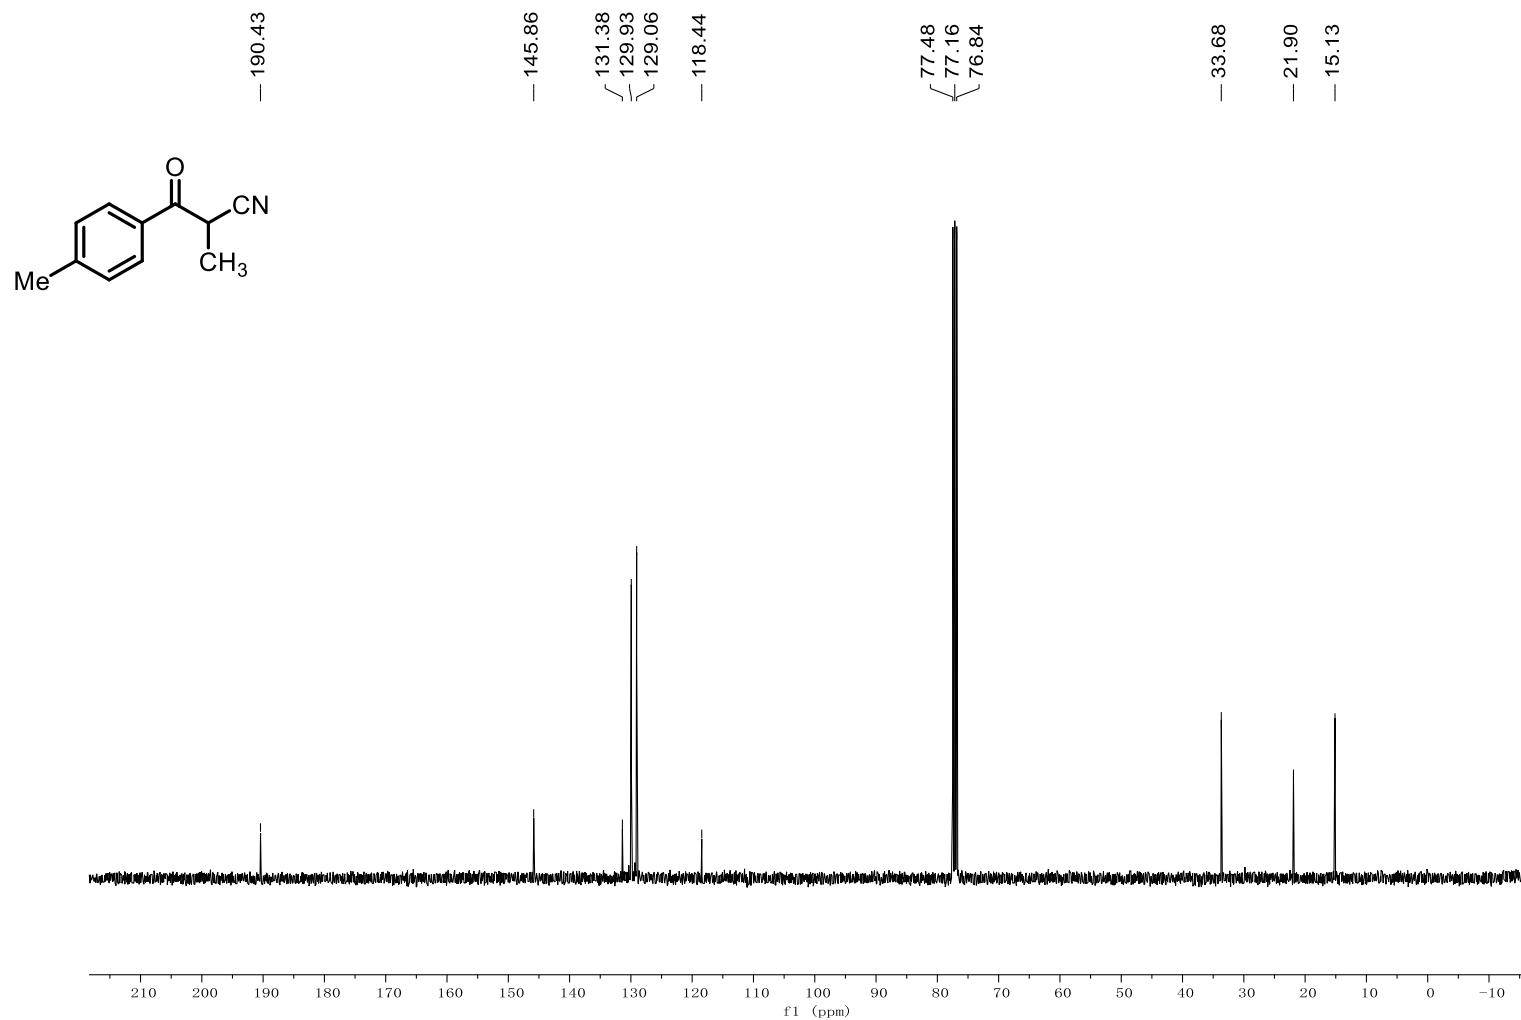

<sup>1</sup>H NMR (400 MHz, CDCl<sub>3</sub>) spectrum of 2-Methyl-3-oxo-3-(*m*-tolyl)propanenitrile (7)

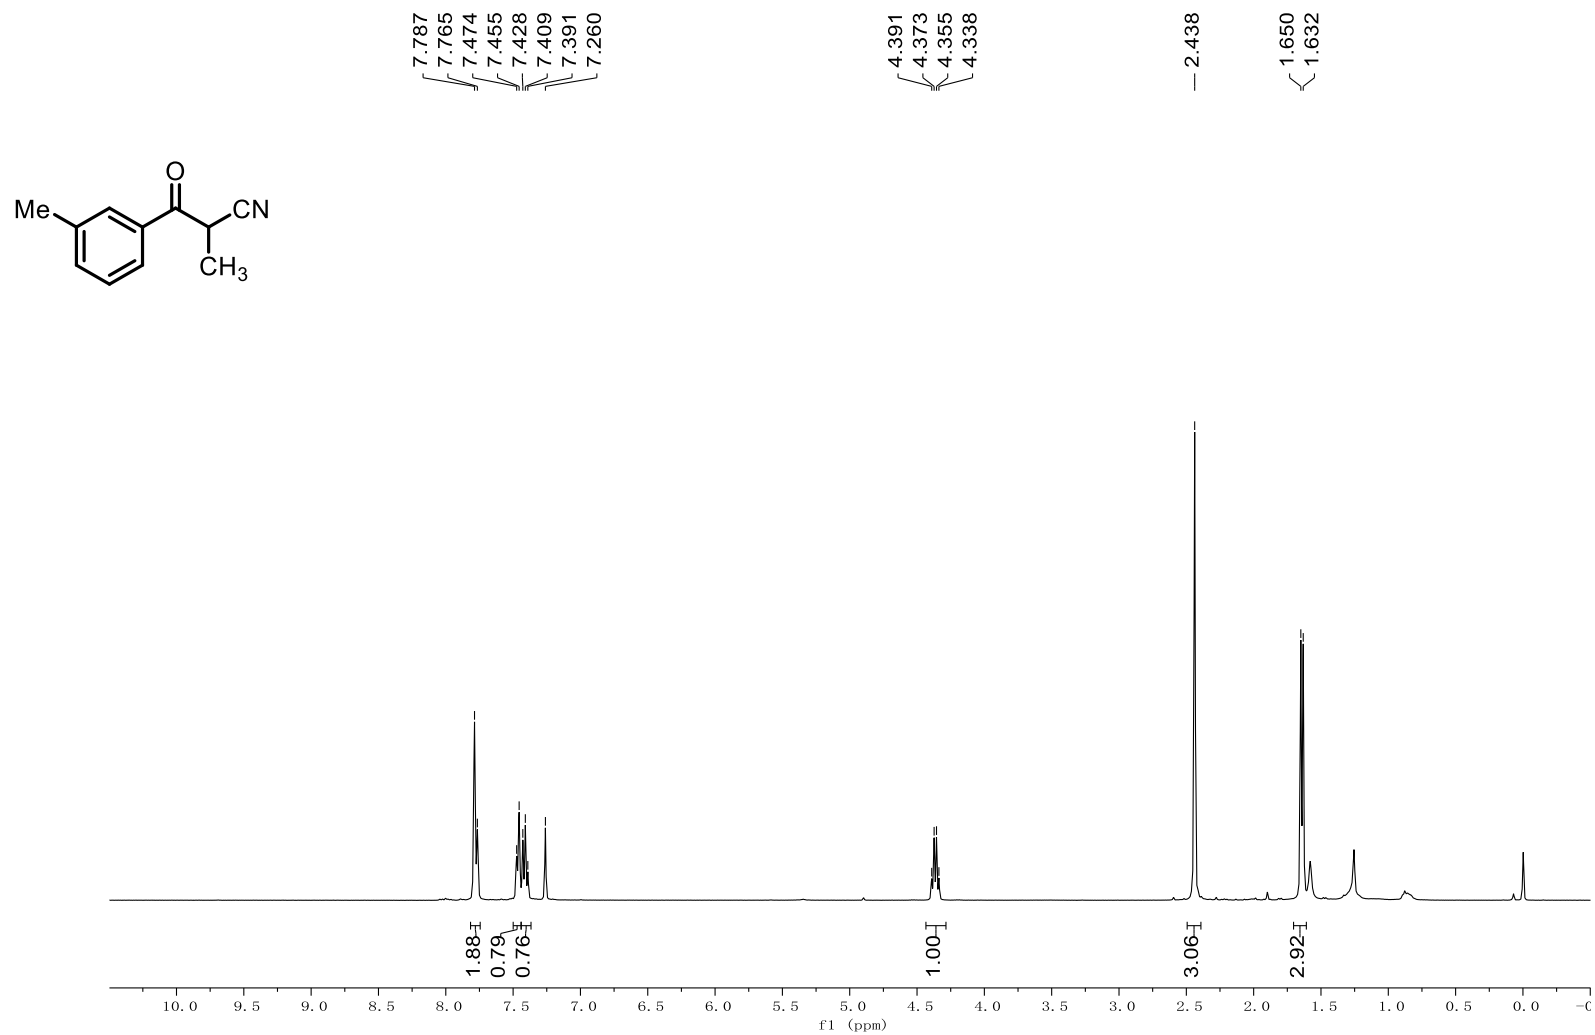

<sup>13</sup>C NMR (100 MHz, CDCl<sub>3</sub>) spectrum of 2-Methyl-3-oxo-3-(*m*-tolyl)propanenitrile (7)

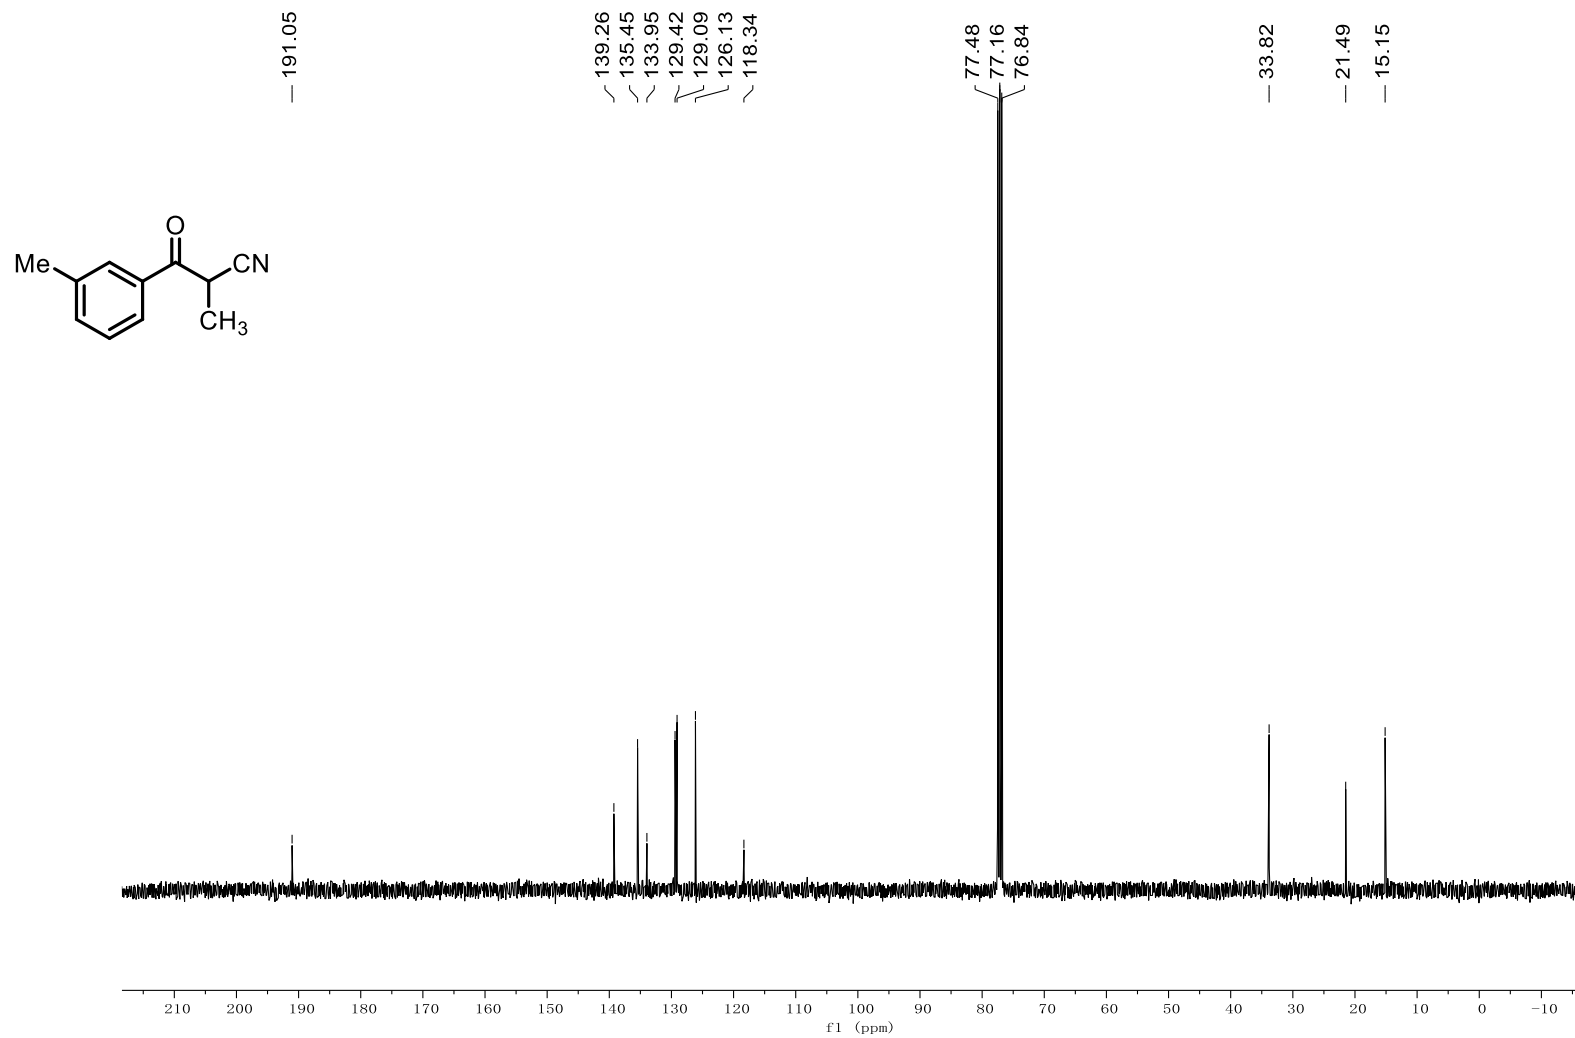

**<sup>1</sup>H NMR (400 MHz, CDCl<sub>3</sub>) spectrum of 3-(4-(*tert*-Butyl)phenyl)-2-methyl-3-oxopropanenitrile (8)**

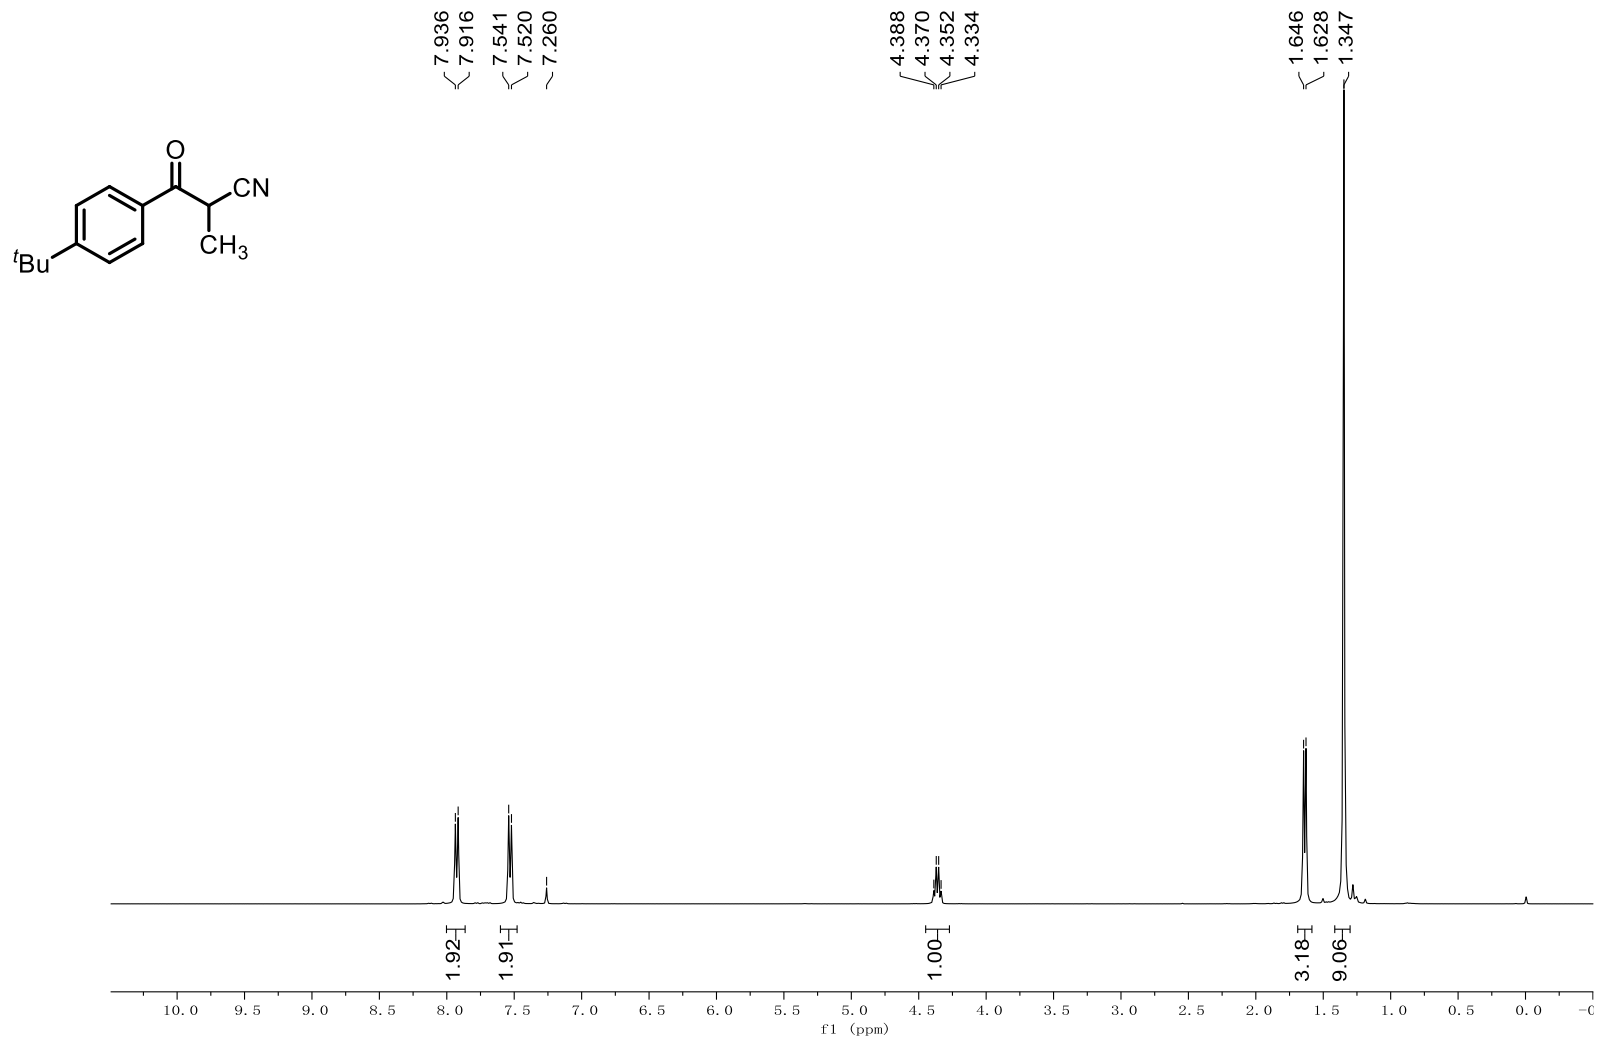

<sup>13</sup>C NMR (100 MHz, CDCl<sub>3</sub>) spectrum of 3-(4-(*tert*-Butyl)phenyl)-2-methyl-3-oxopropanenitrile (8)

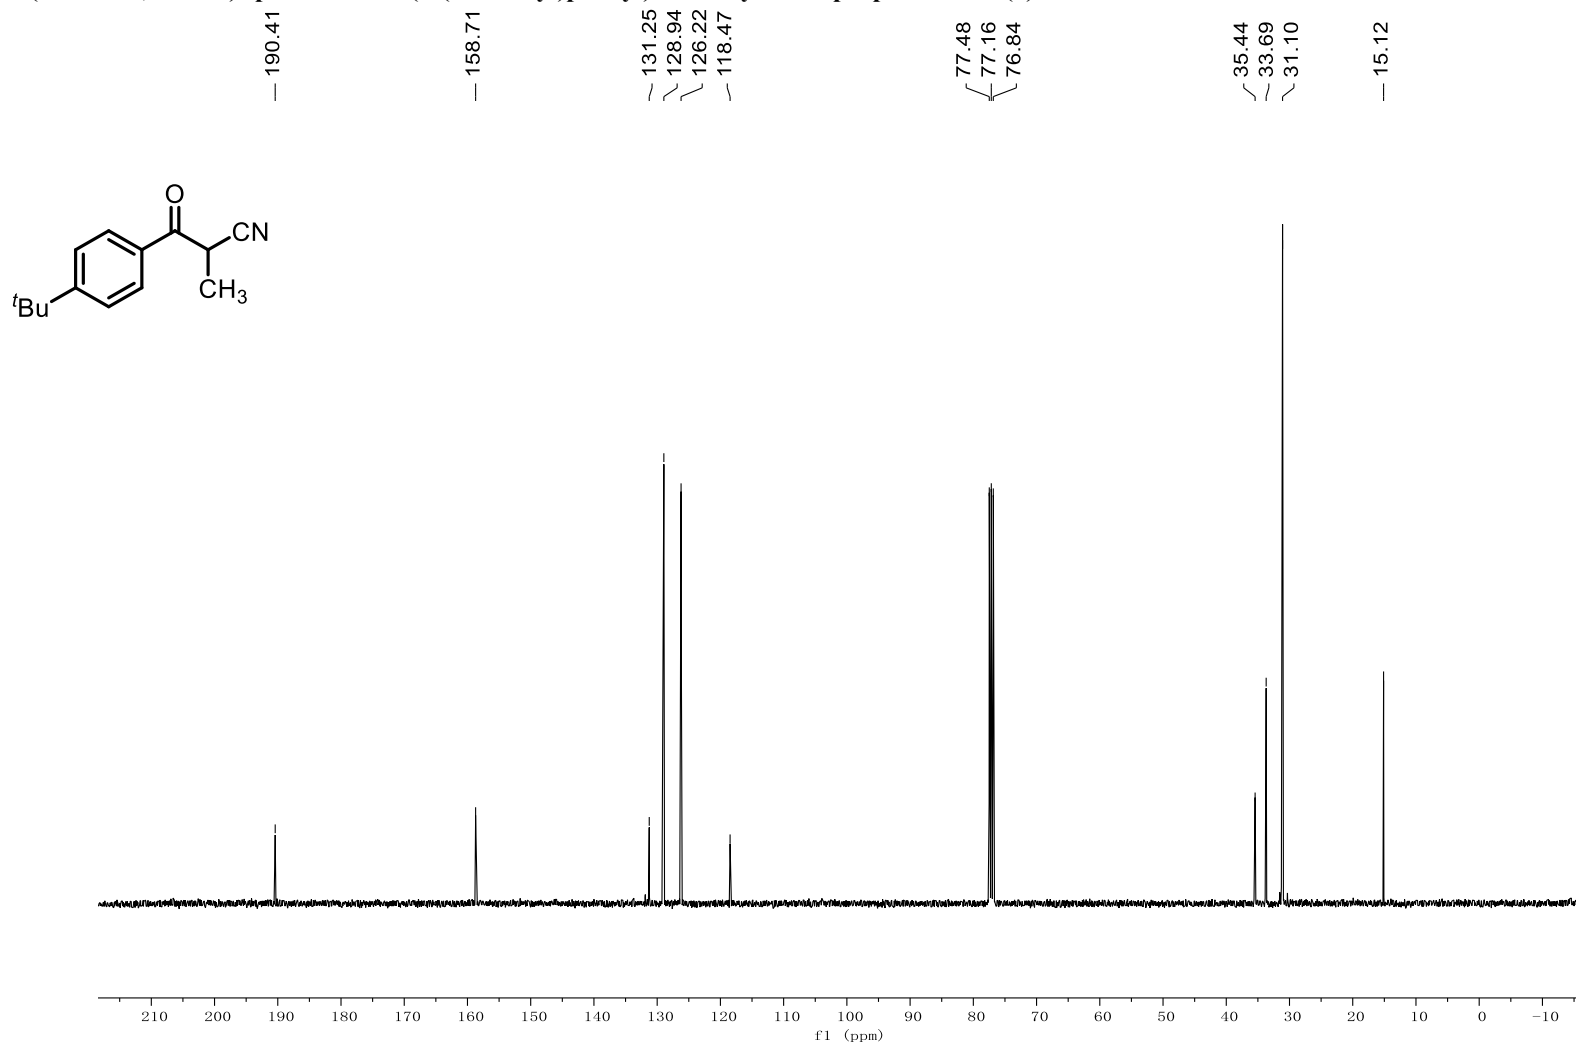

**<sup>1</sup>H NMR (400 MHz, CDCl<sub>3</sub>) spectrum of 3-(4-Methoxyphenyl)-2-methyl-3-oxopropanenitrile (9)**

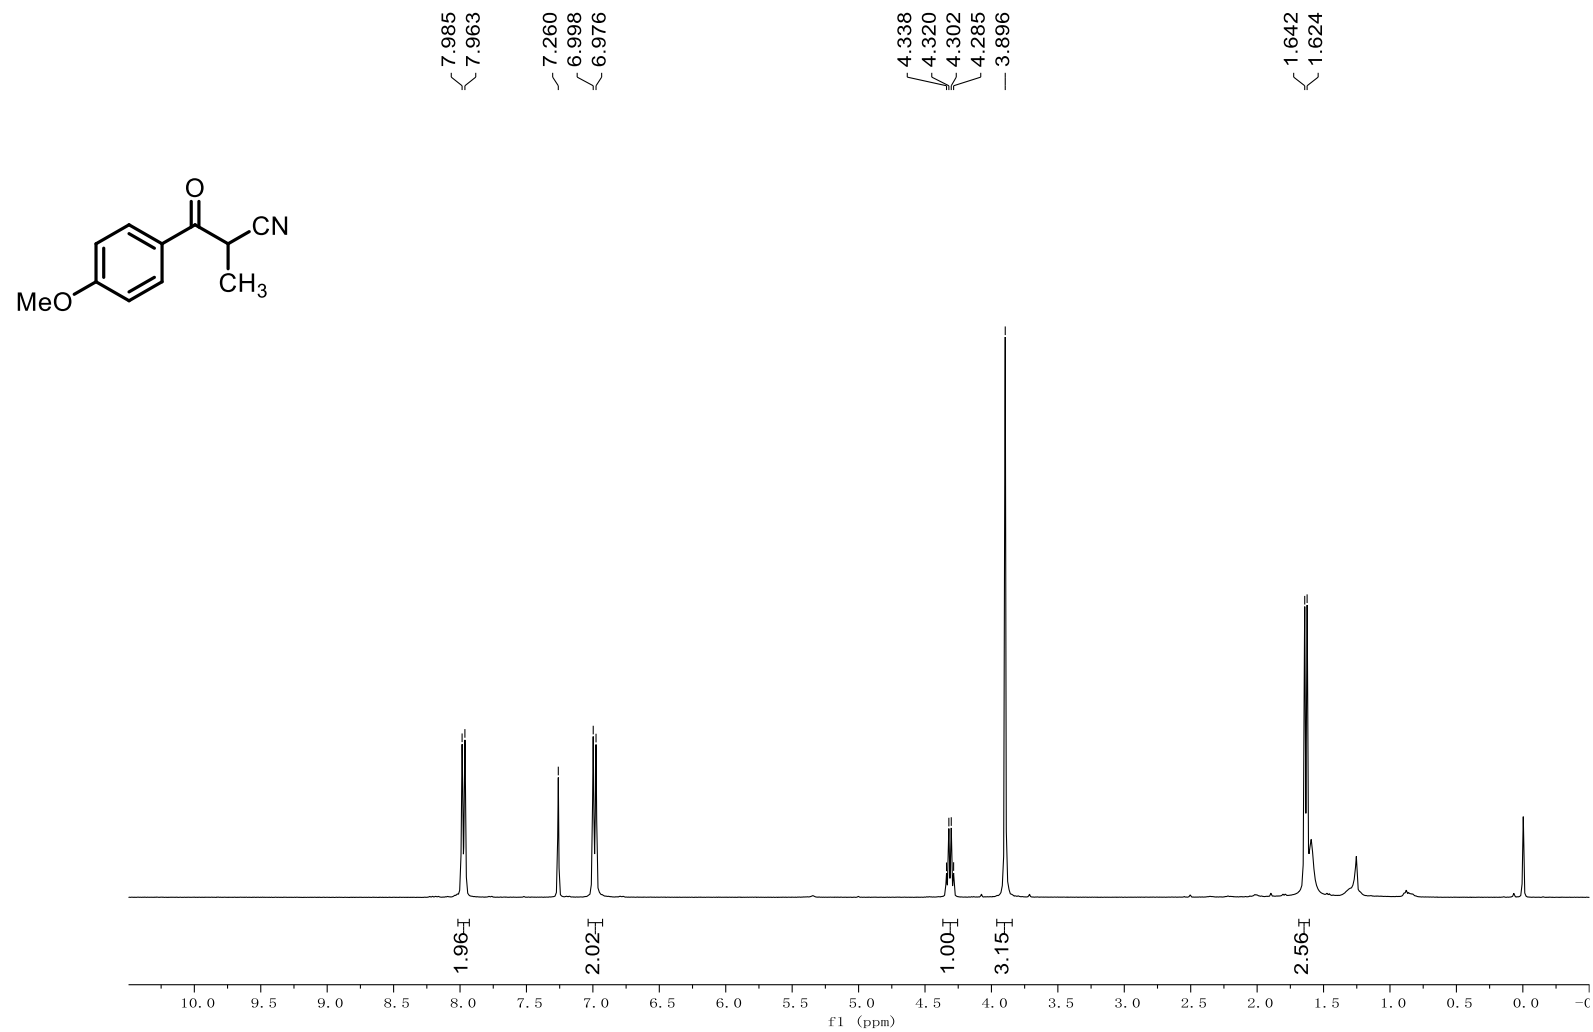

**<sup>13</sup>C NMR (100 MHz, CDCl<sub>3</sub>) spectrum of 3-(4-Methoxyphenyl)-2-methyl-3-oxopropanenitrile (9)**

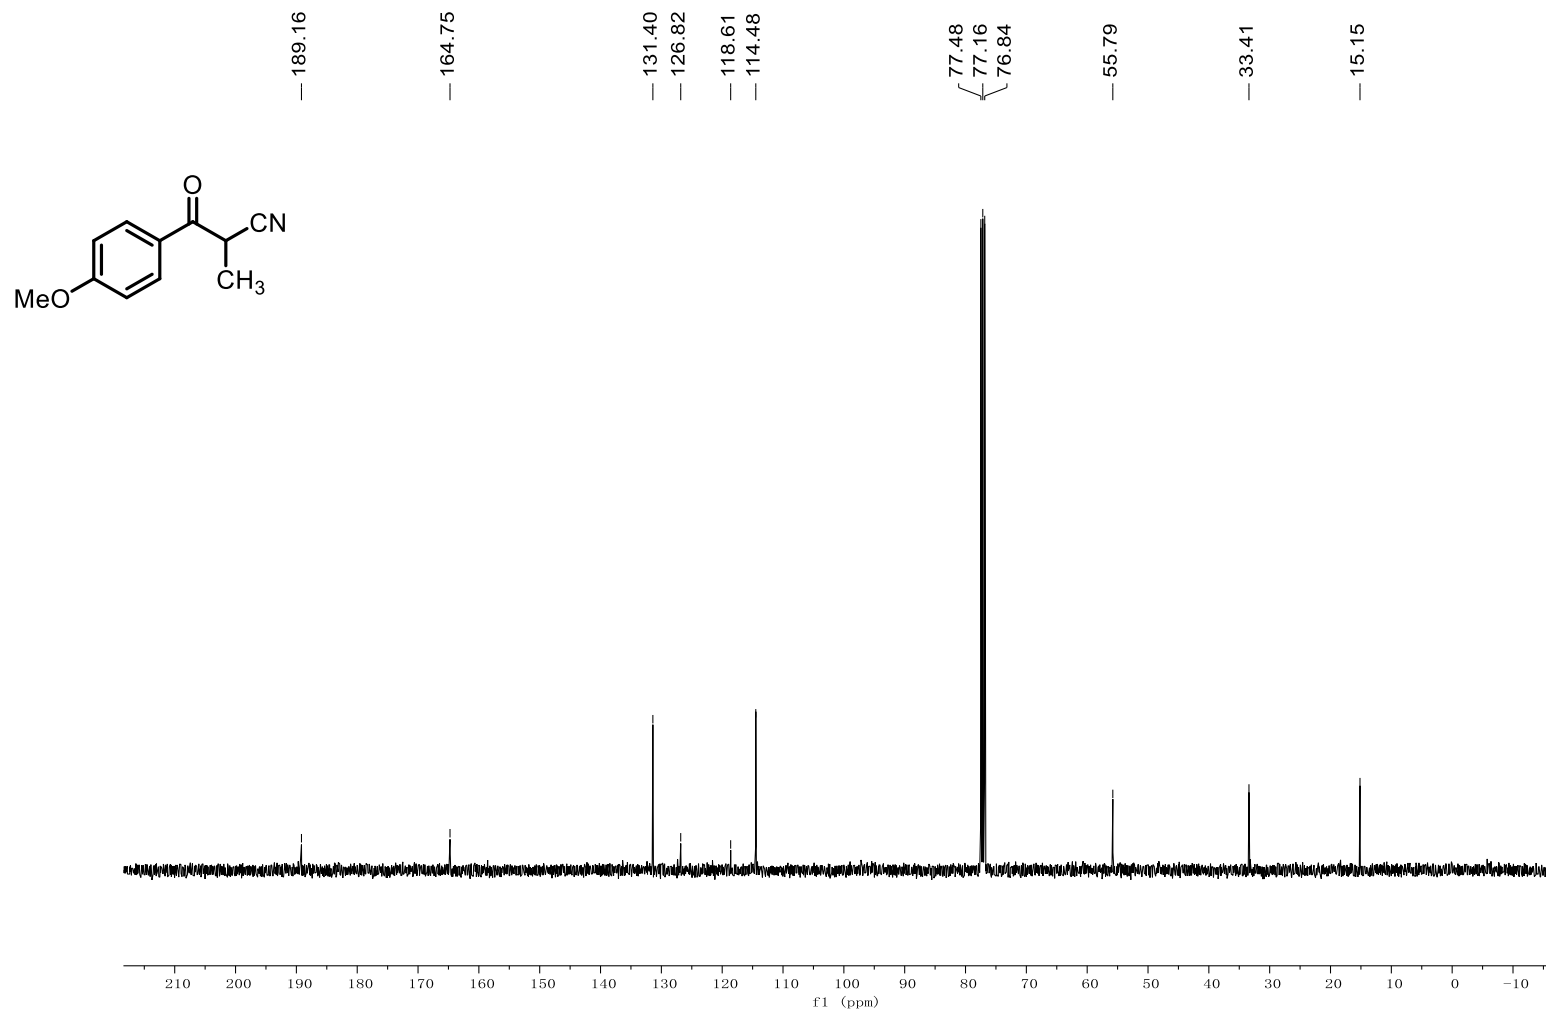

**<sup>1</sup>H NMR (400 MHz, CDCl<sub>3</sub>) spectrum of 2-Methyl-3-(4-(methylthio)phenyl)-3-oxopropanenitrile (10)**

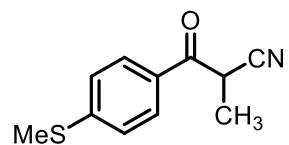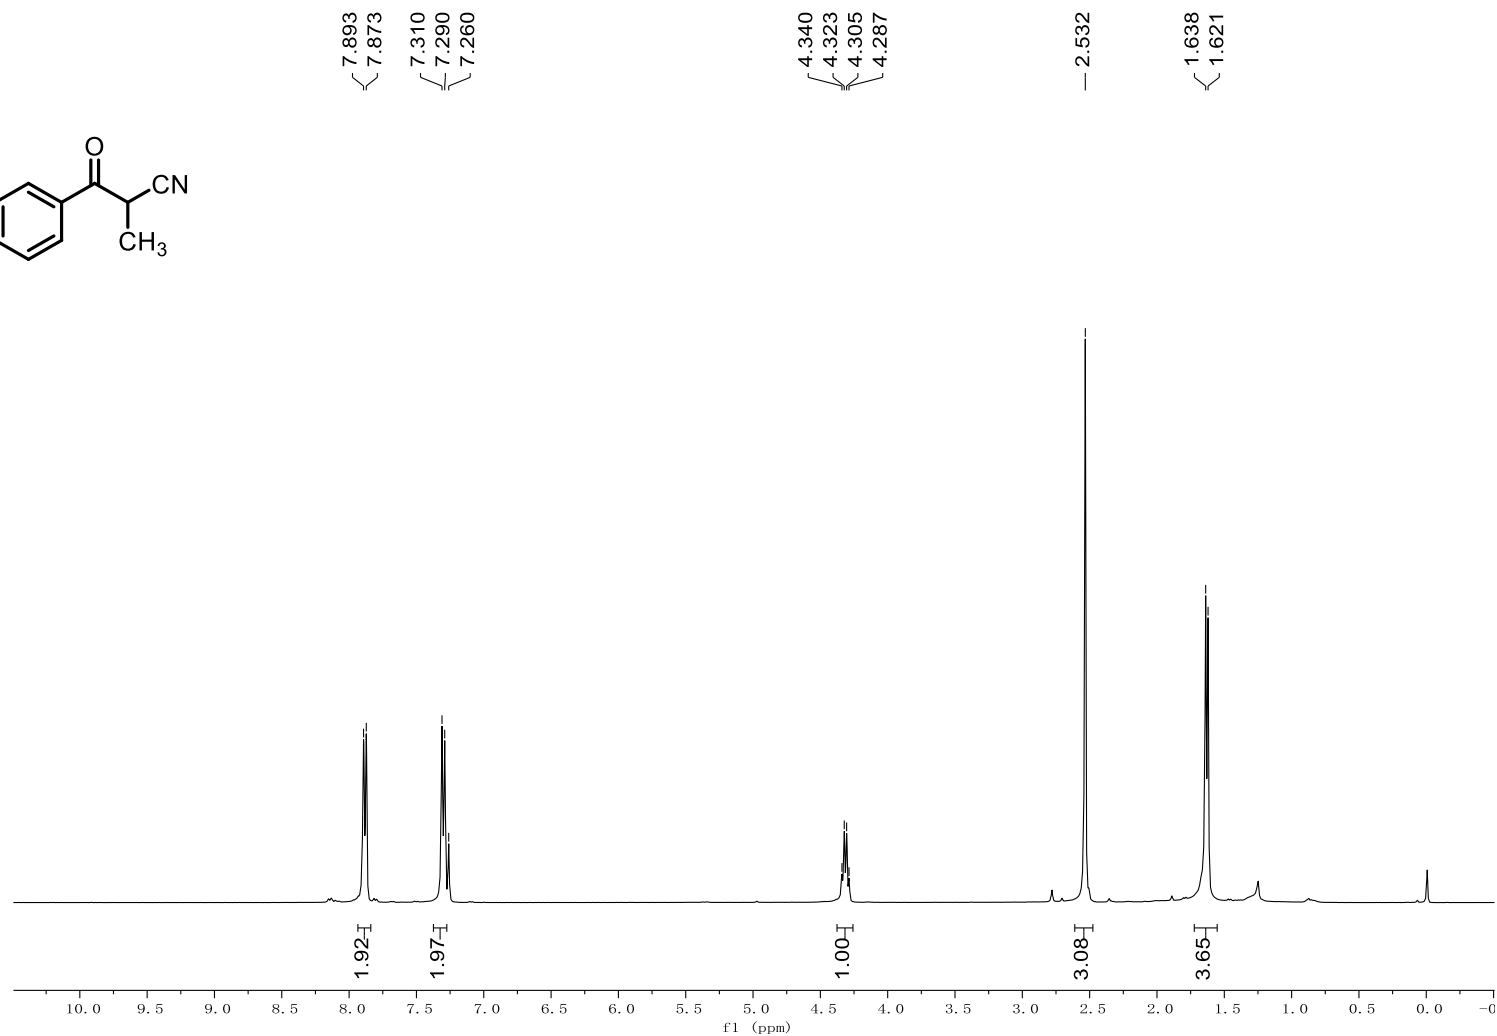

<sup>13</sup>C NMR (100 MHz, CDCl<sub>3</sub>) spectrum of 2-Methyl-3-(4-(methylthio)phenyl)-3-oxopropanenitrile (10)

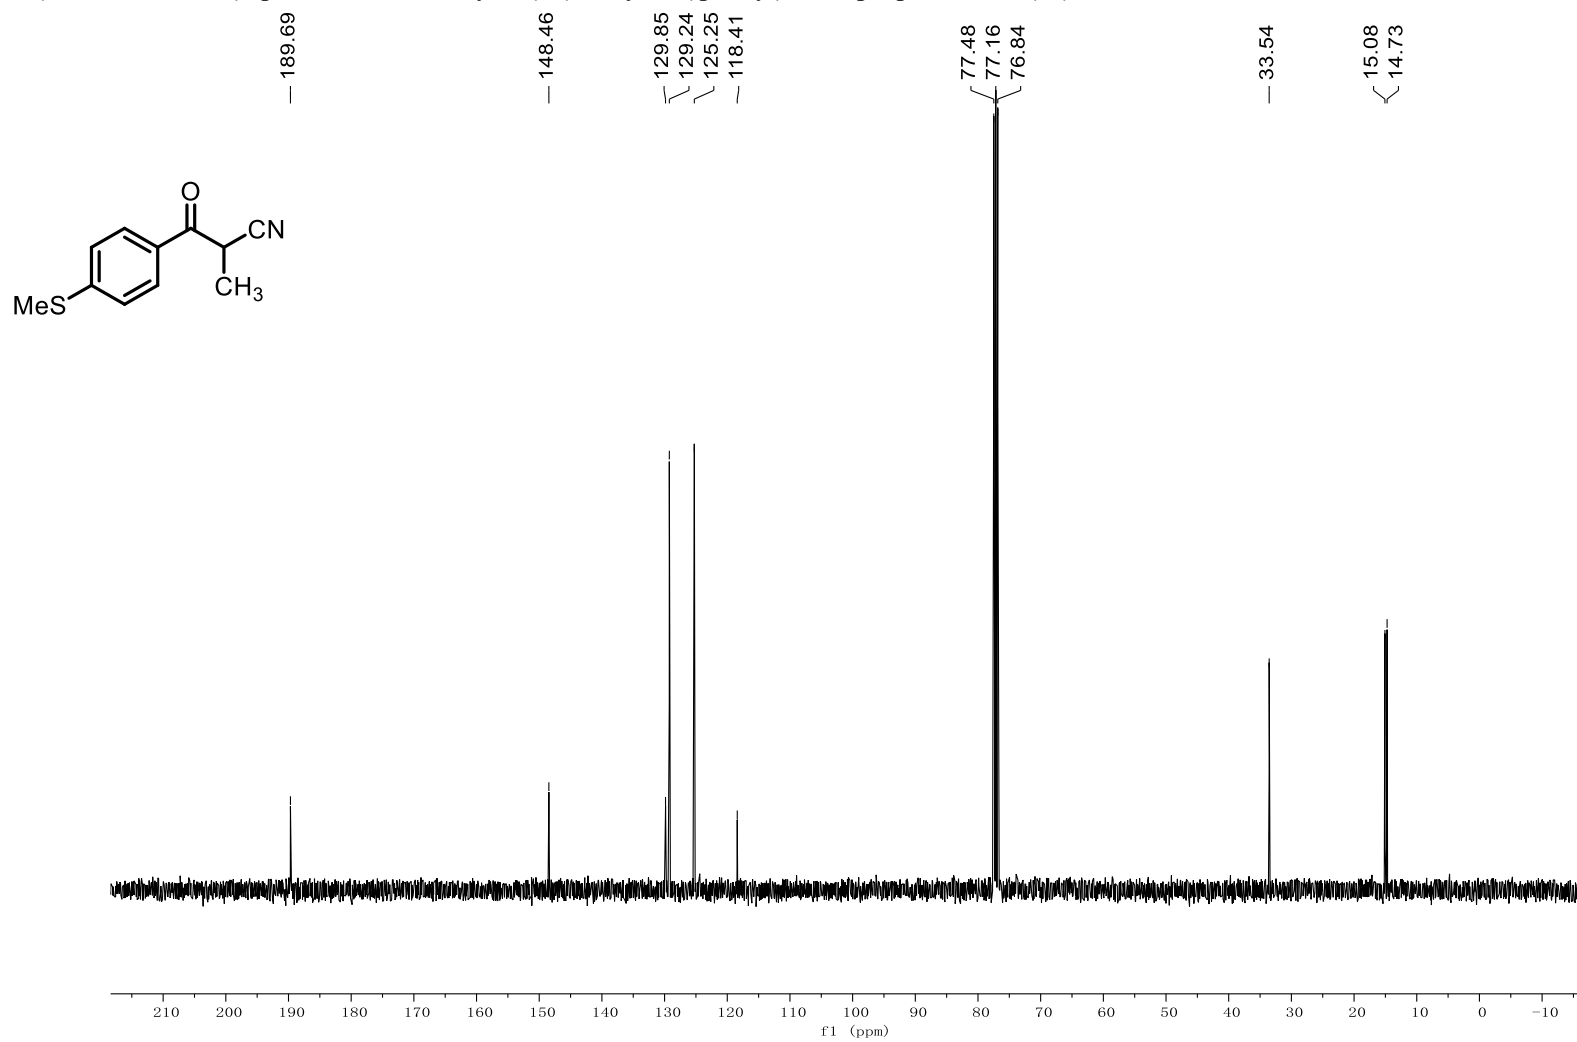

<sup>1</sup>H NMR (400 MHz, CDCl<sub>3</sub>) spectrum of 3-(4-(Diphenylamino)phenyl)-2-methyl-3-oxopropanenitrile (11)

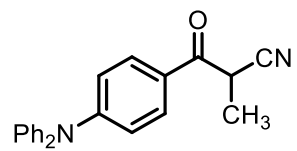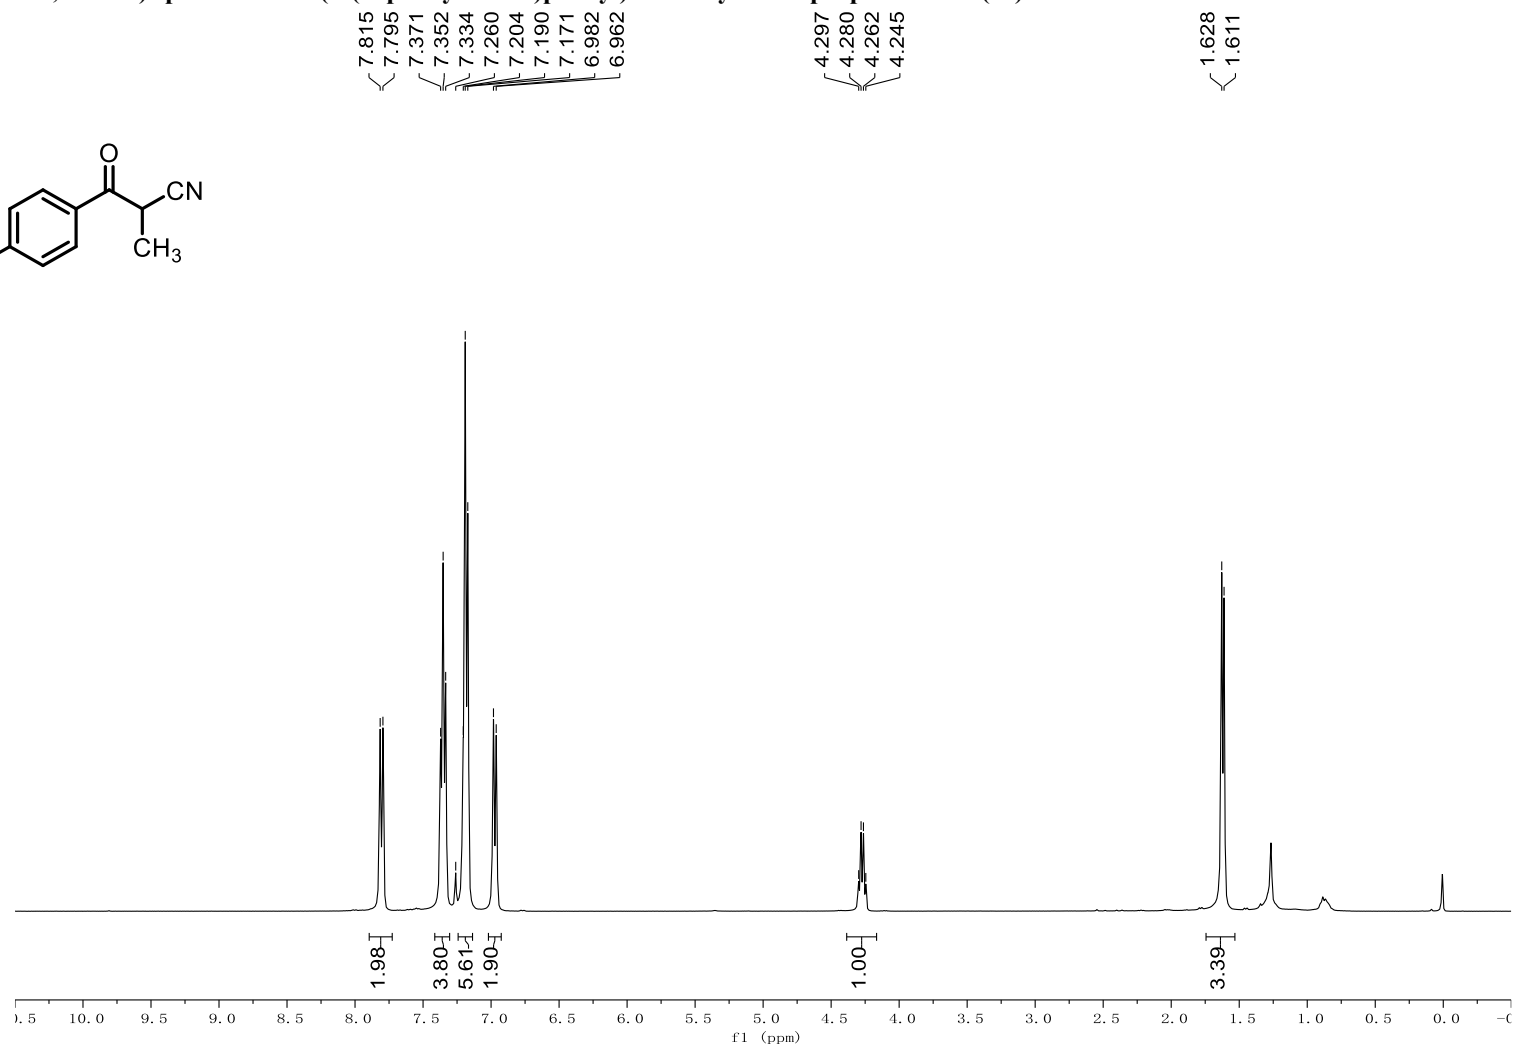

<sup>13</sup>C NMR (100 MHz, CDCl<sub>3</sub>) spectrum of 3-(4-(Diphenylamino)phenyl)-2-methyl-3-oxopropanenitrile (11)

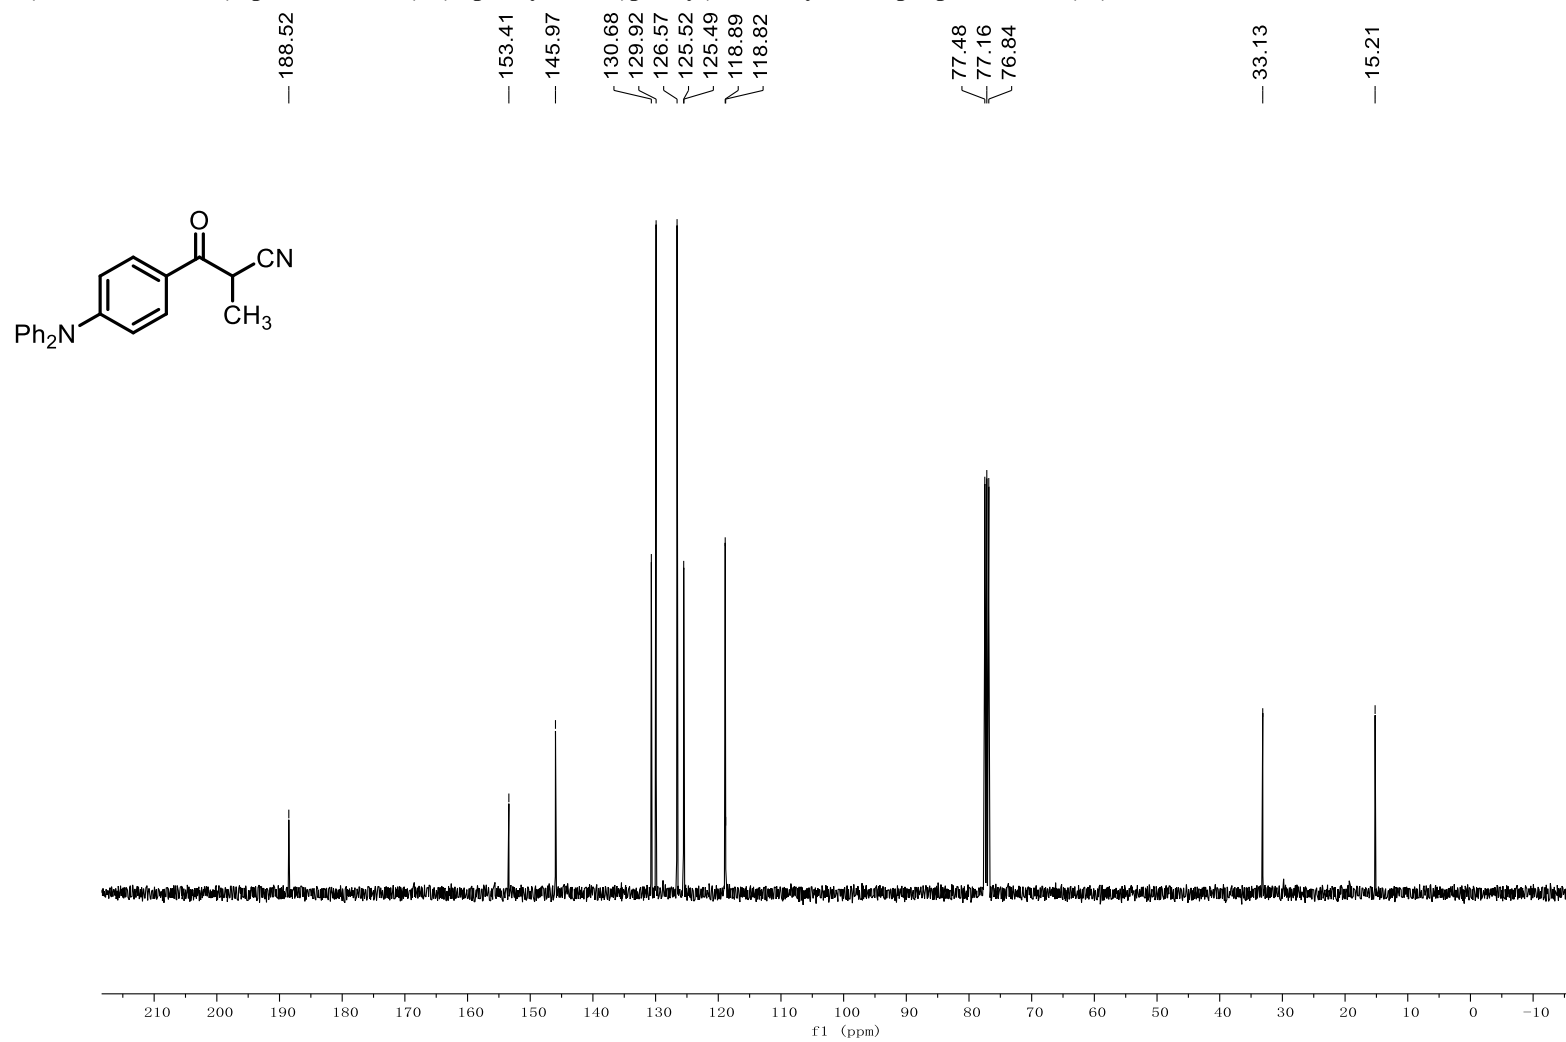

<sup>1</sup>H NMR (400 MHz, CDCl<sub>3</sub>) spectrum of 2-Methyl-3-oxo-3-(4-(pyrrolidin-1-yl)phenyl)propanenitrile (12)

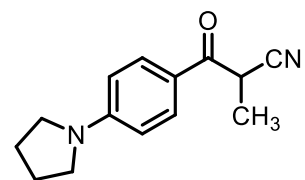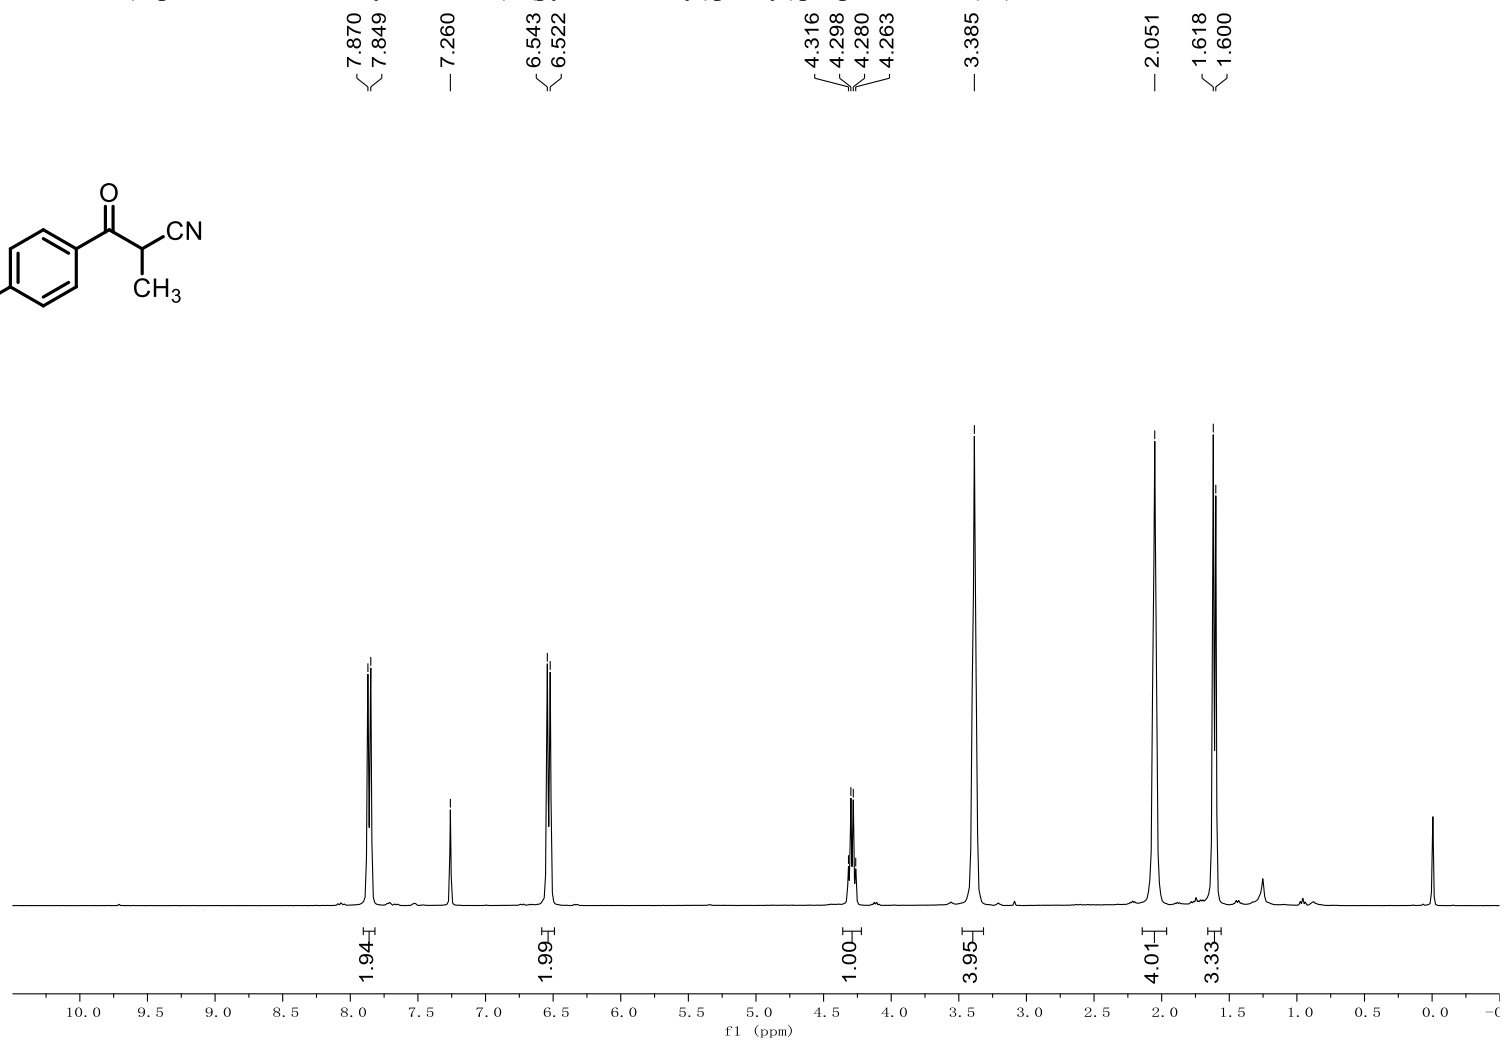

<sup>13</sup>C NMR (100 MHz, CDCl<sub>3</sub>) spectrum of 2-Methyl-3-oxo-3-(4-(pyrrolidin-1-yl)phenyl)propanenitrile (12)

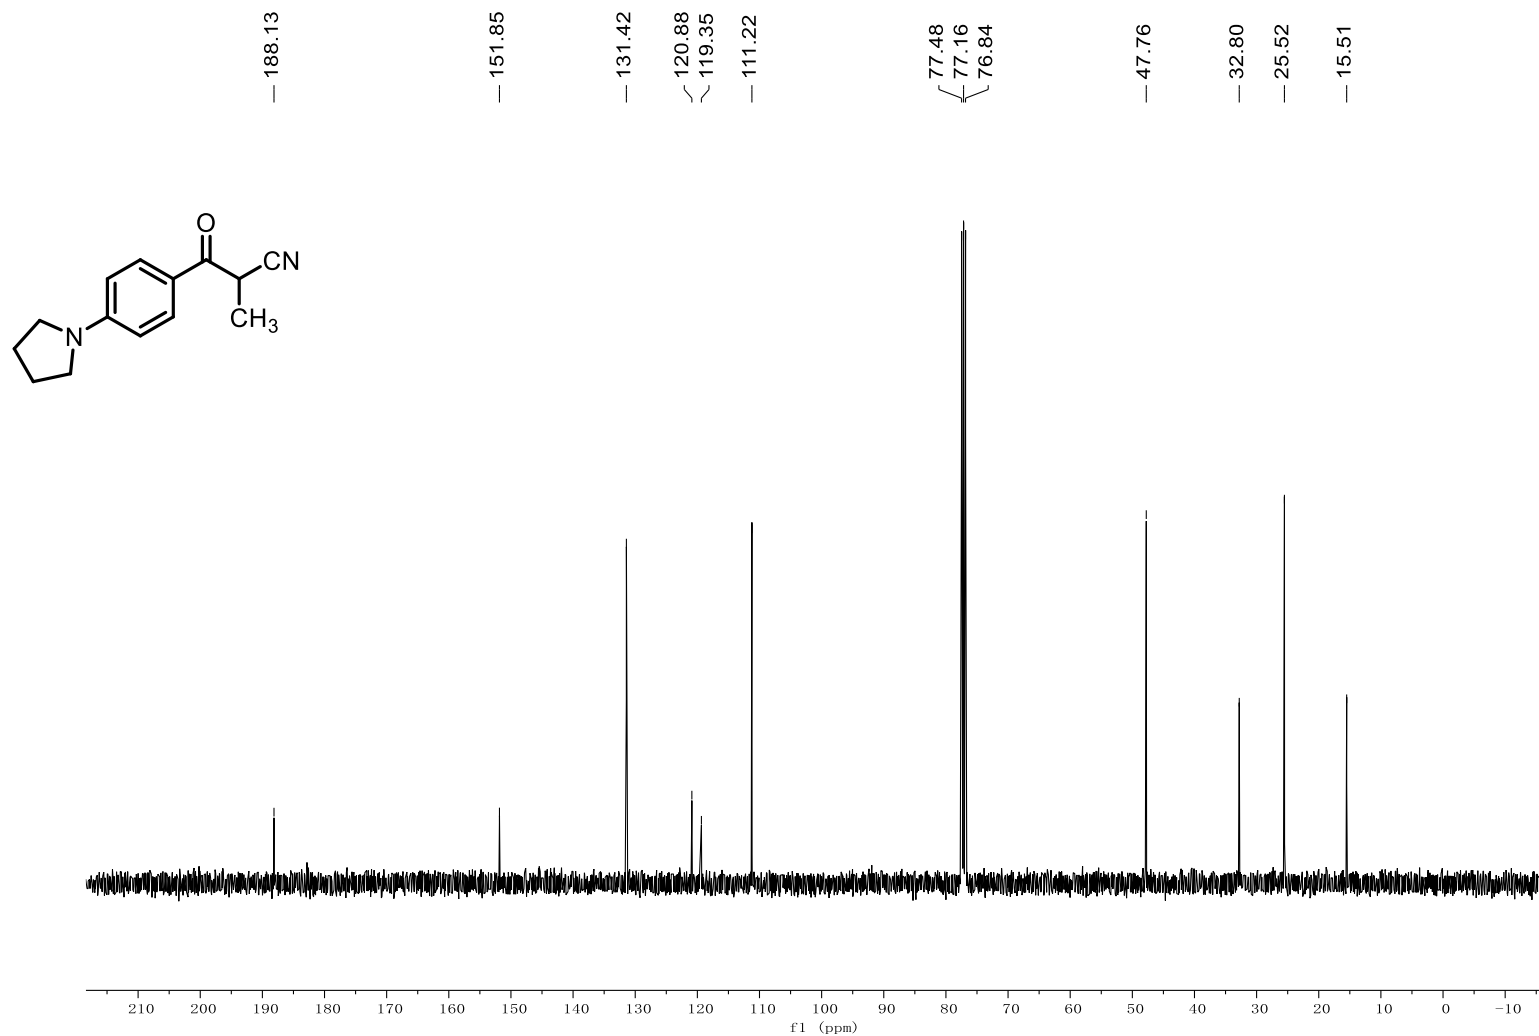

<sup>1</sup>H NMR (400 MHz, CDCl<sub>3</sub>) spectrum of 2-Methyl-3-(4-morpholinophenyl)-3-oxopropanenitrile (13)

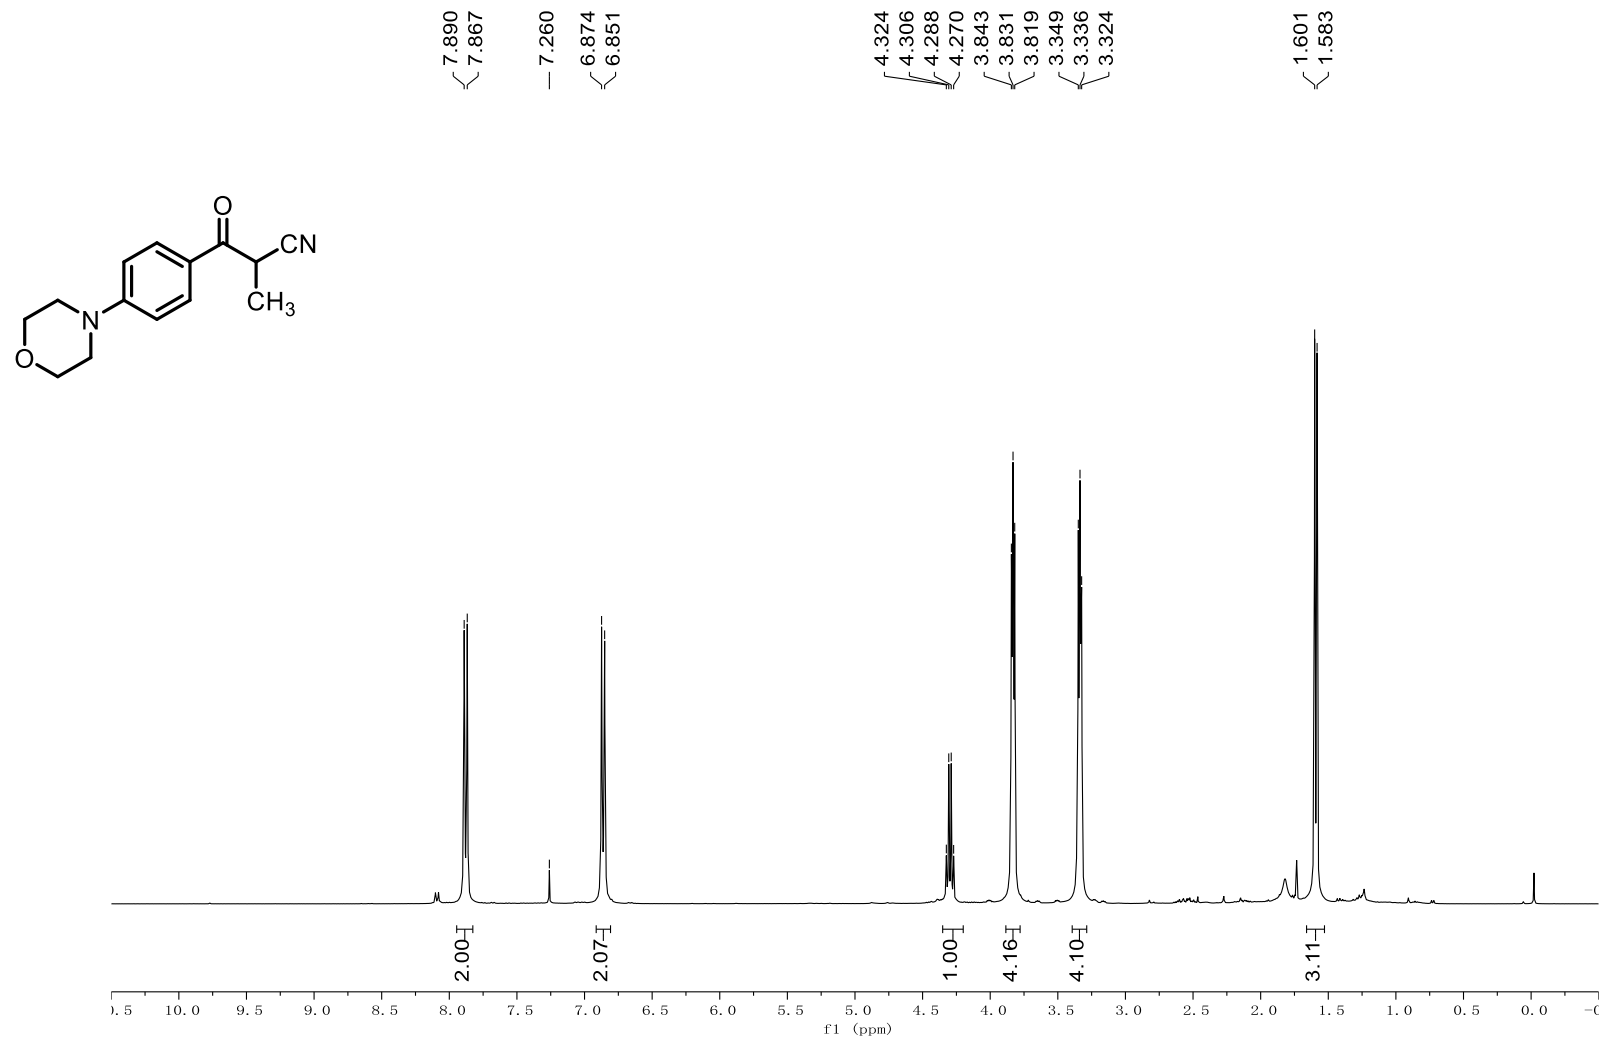

<sup>13</sup>C NMR (100 MHz, CDCl<sub>3</sub>) spectrum of 2-Methyl-3-(4-morpholinophenyl)-3-oxopropanenitrile (13)

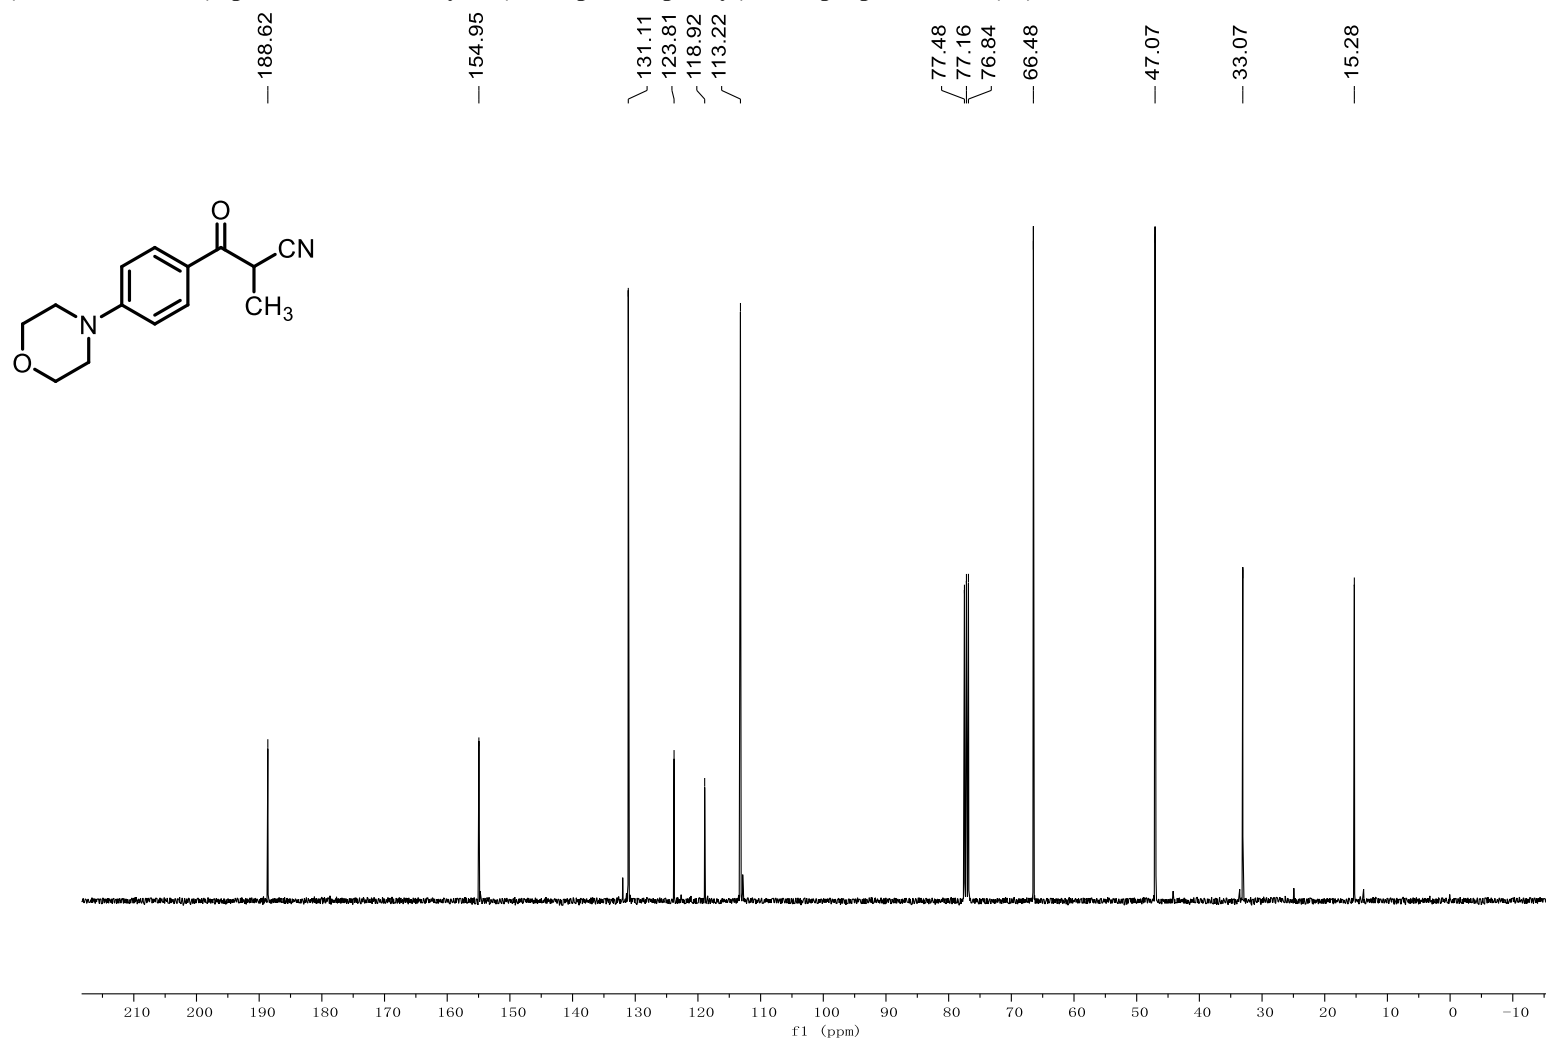

**<sup>1</sup>H NMR (400 MHz, CDCl<sub>3</sub>) spectrum of Methyl 3-(2-cyanopropanoyl)benzoate (14)**

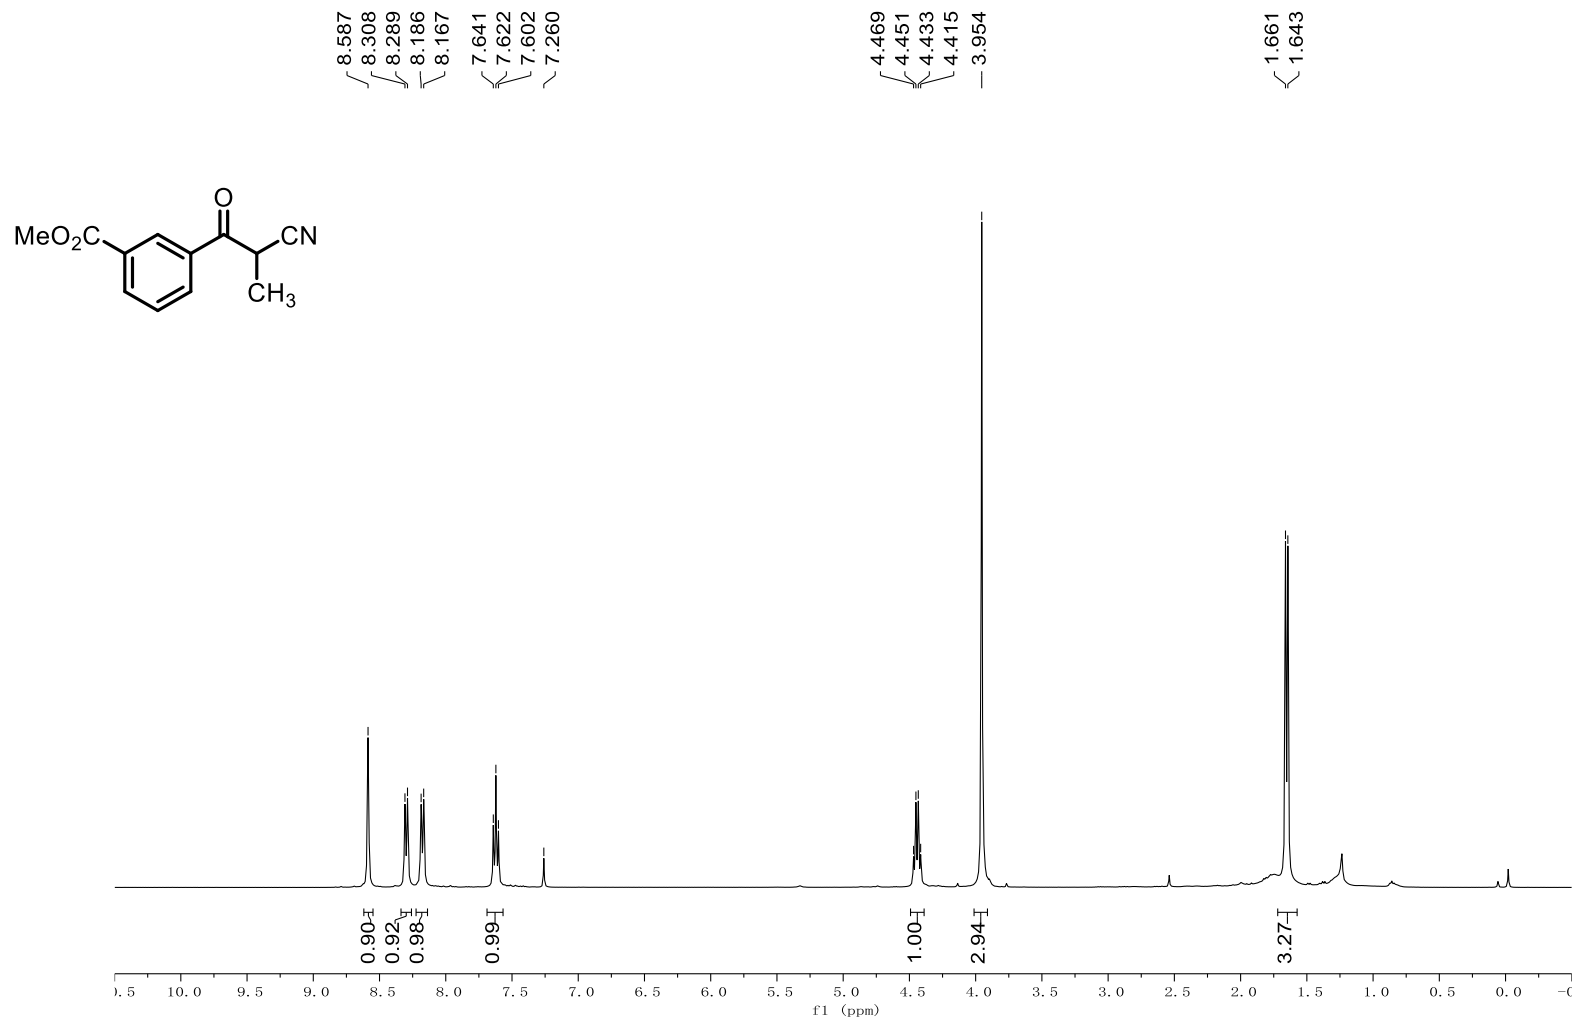

<sup>13</sup>C NMR (100 MHz, CDCl<sub>3</sub>) spectrum of Methyl 3-(2-cyanopropanoyl)benzoate (14)

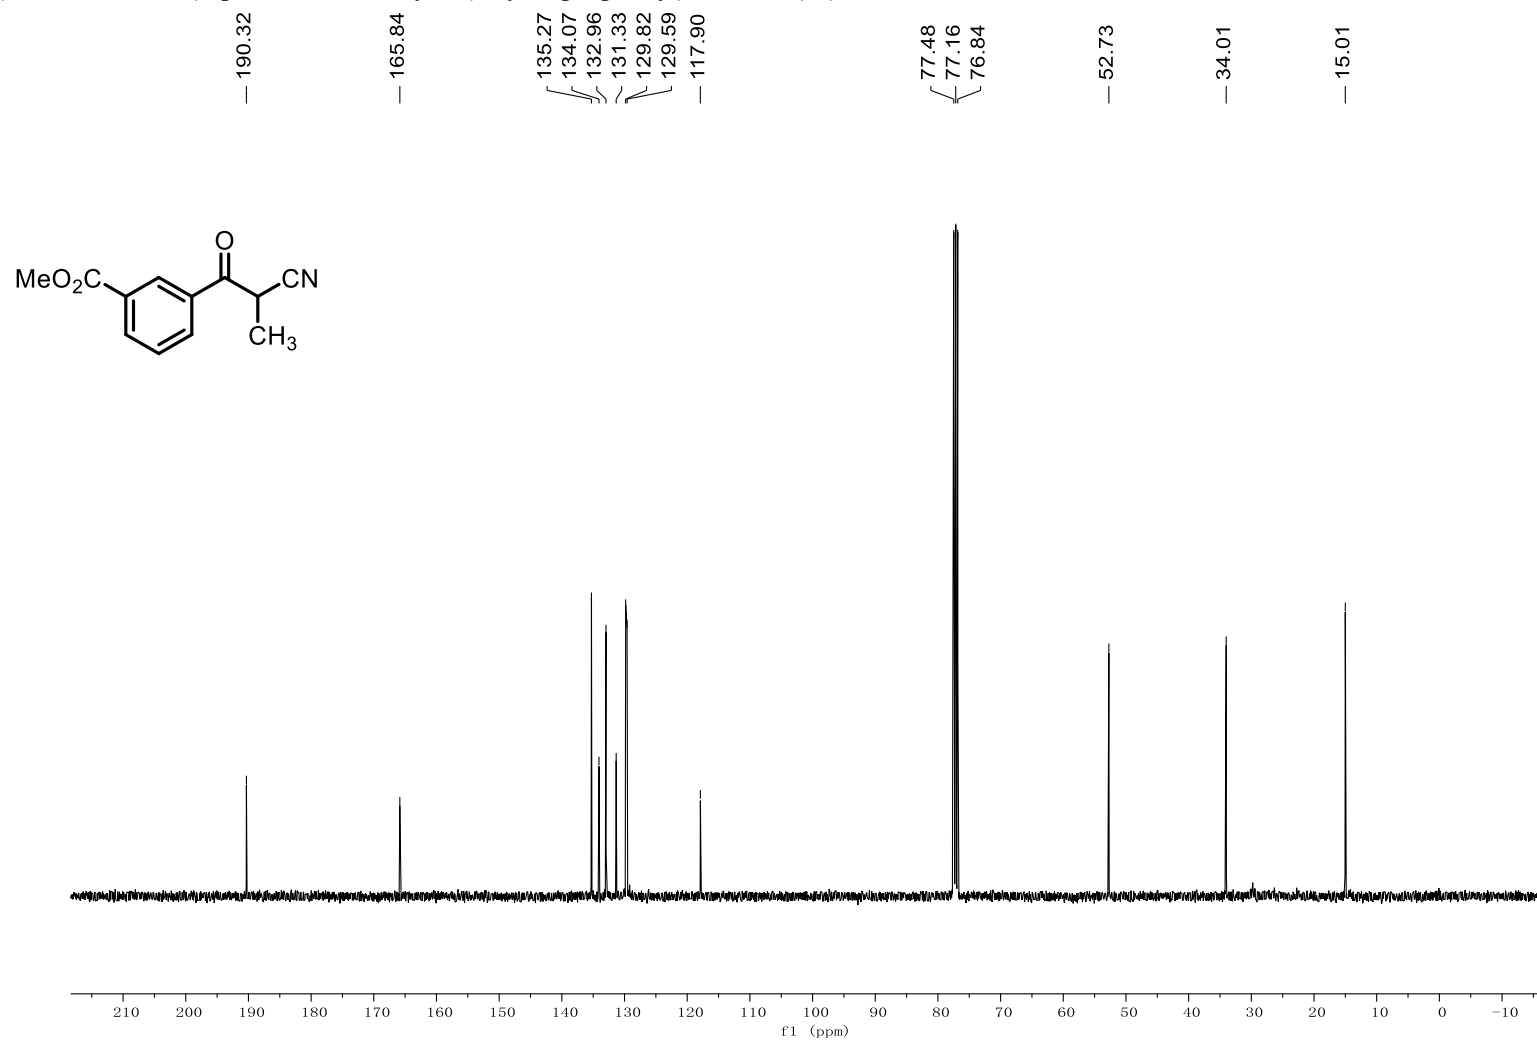

**<sup>1</sup>H NMR (400 MHz, CDCl<sub>3</sub>) spectrum of 3-(3-Fluorophenyl)-2-methyl-3-oxopropanenitrile (15)**

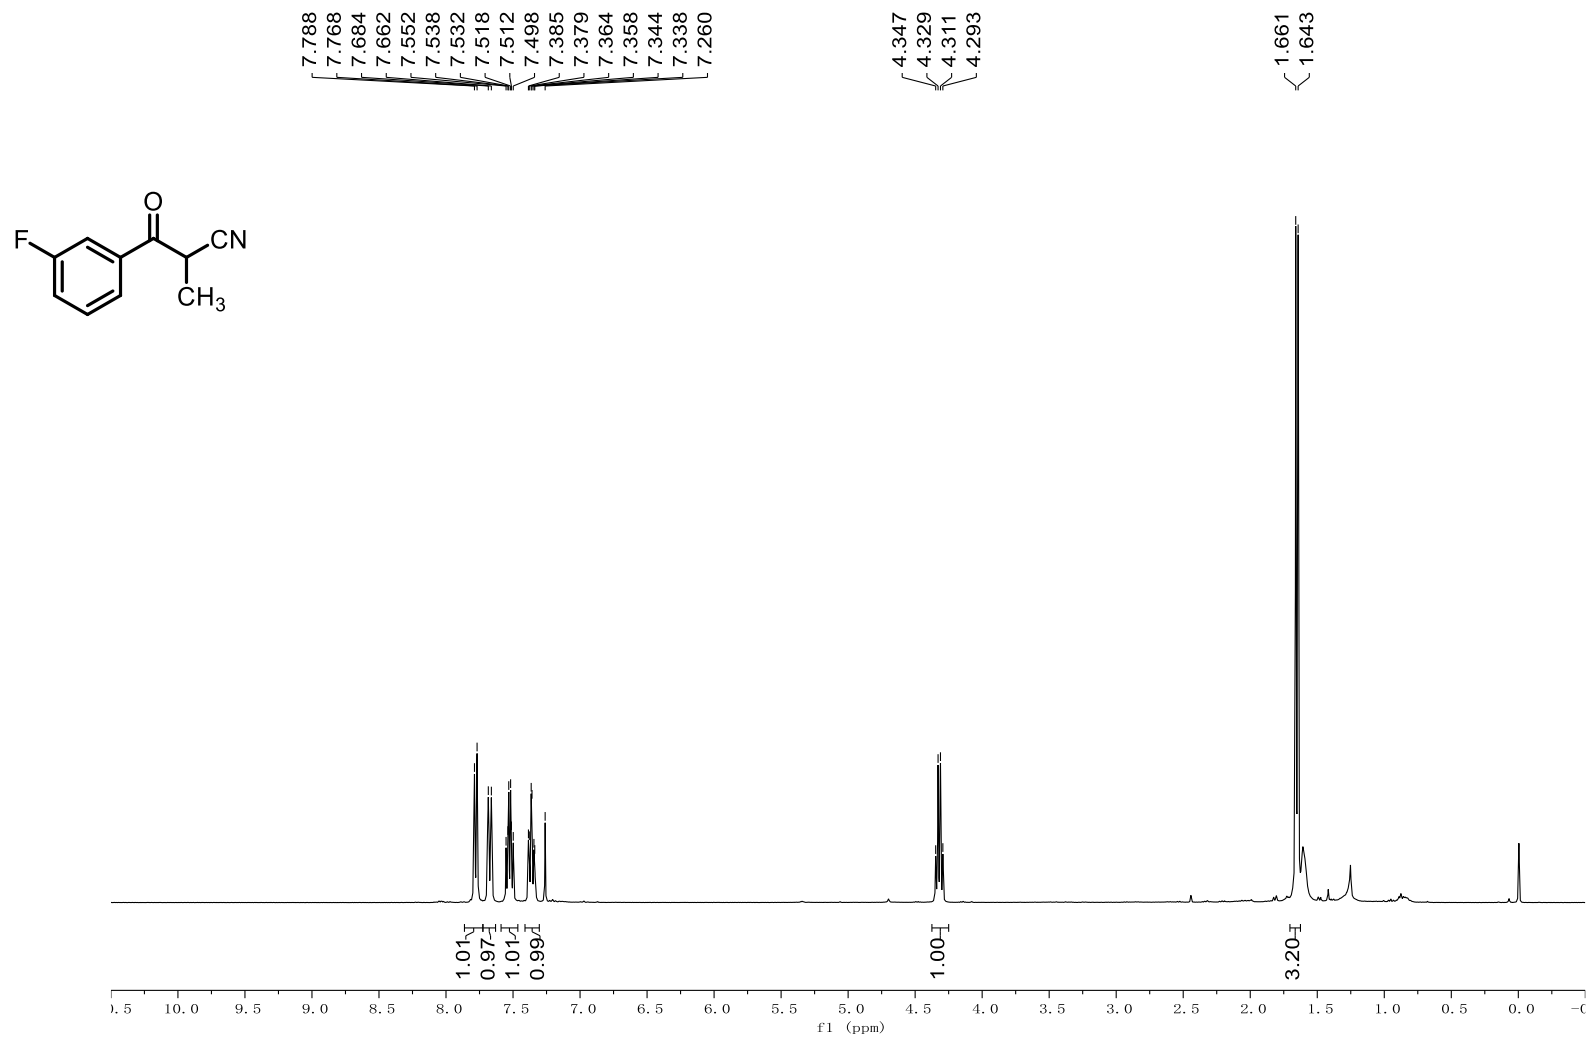

<sup>13</sup>C NMR (100 MHz, CDCl<sub>3</sub>) spectrum of 3-(3-Fluorophenyl)-2-methyl-3-oxopropanenitrile (15)

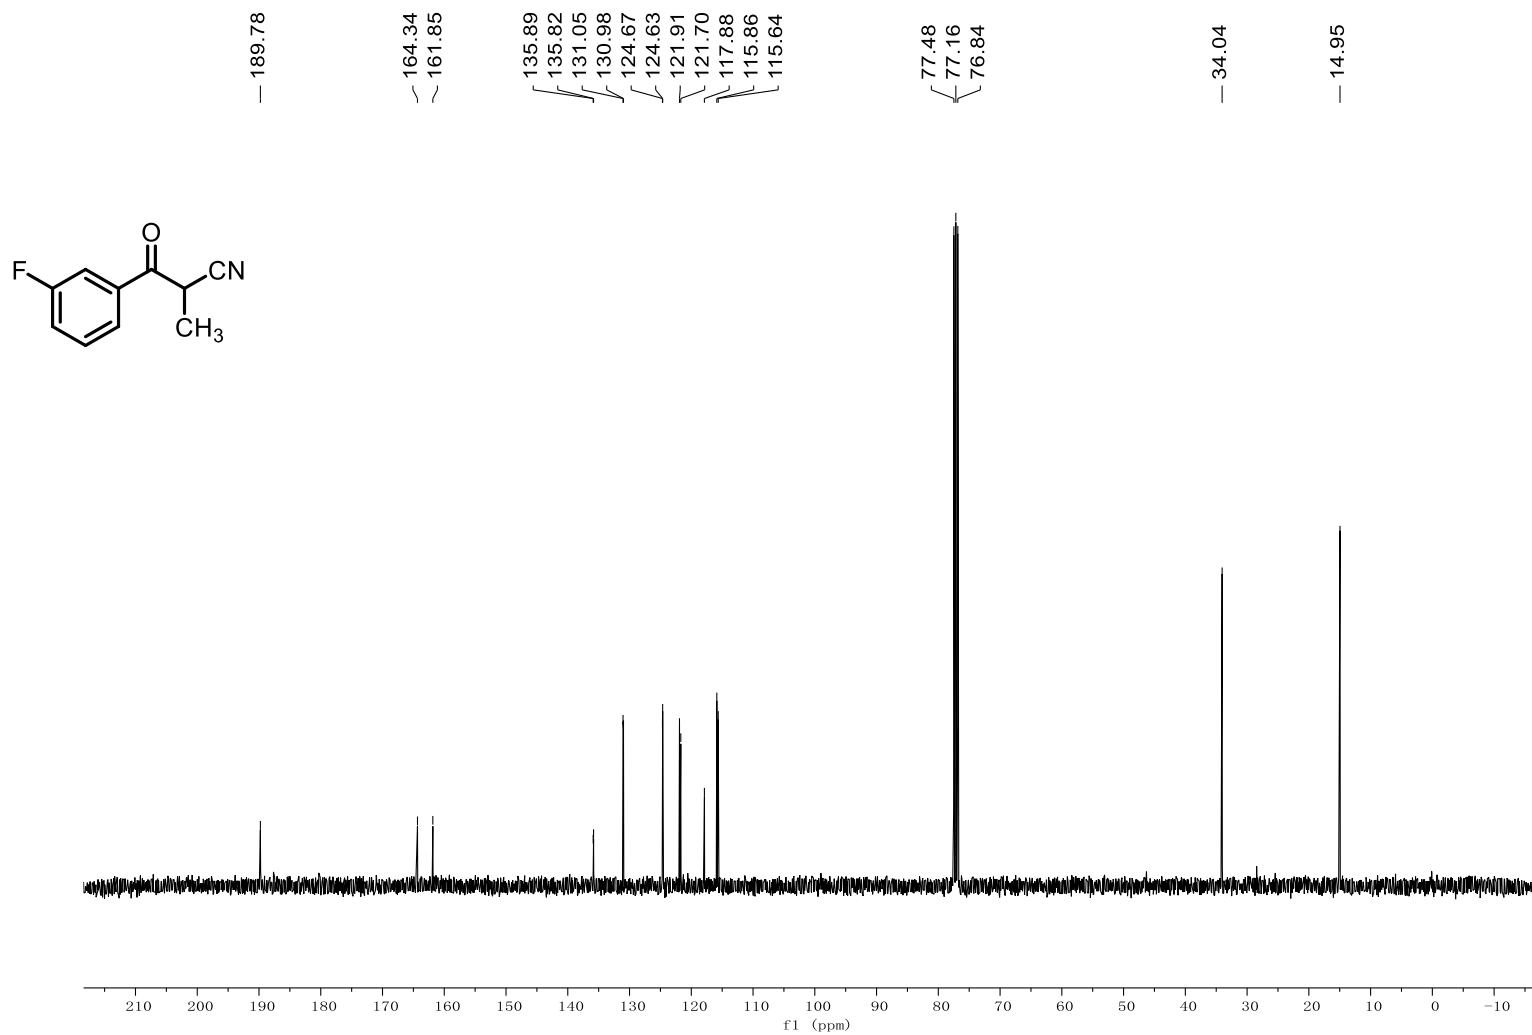

**$^{19}\text{F}$  NMR (376 MHz,  $\text{CDCl}_3$ ) spectrum of 3-(3-Fluorophenyl)-2-methyl-3-oxopropanenitrile (15)**

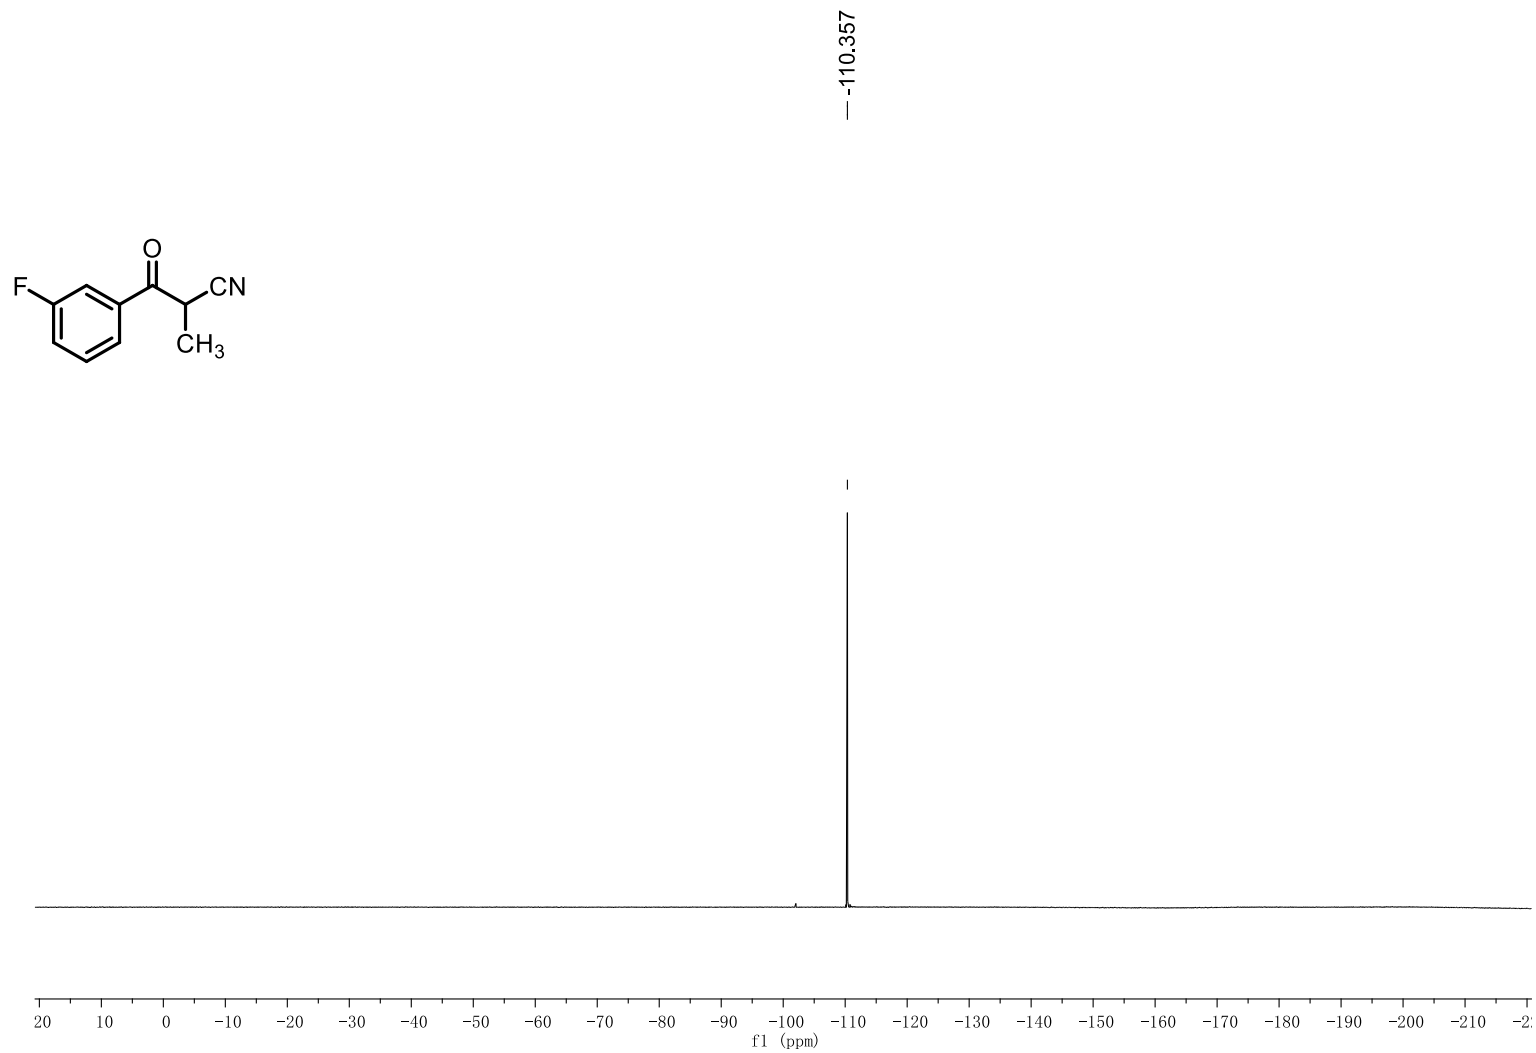

**<sup>1</sup>H NMR (400 MHz, CDCl<sub>3</sub>) spectrum of 3-(4-Fluorophenyl)-2-methyl-3-oxopropanenitrile (16)**

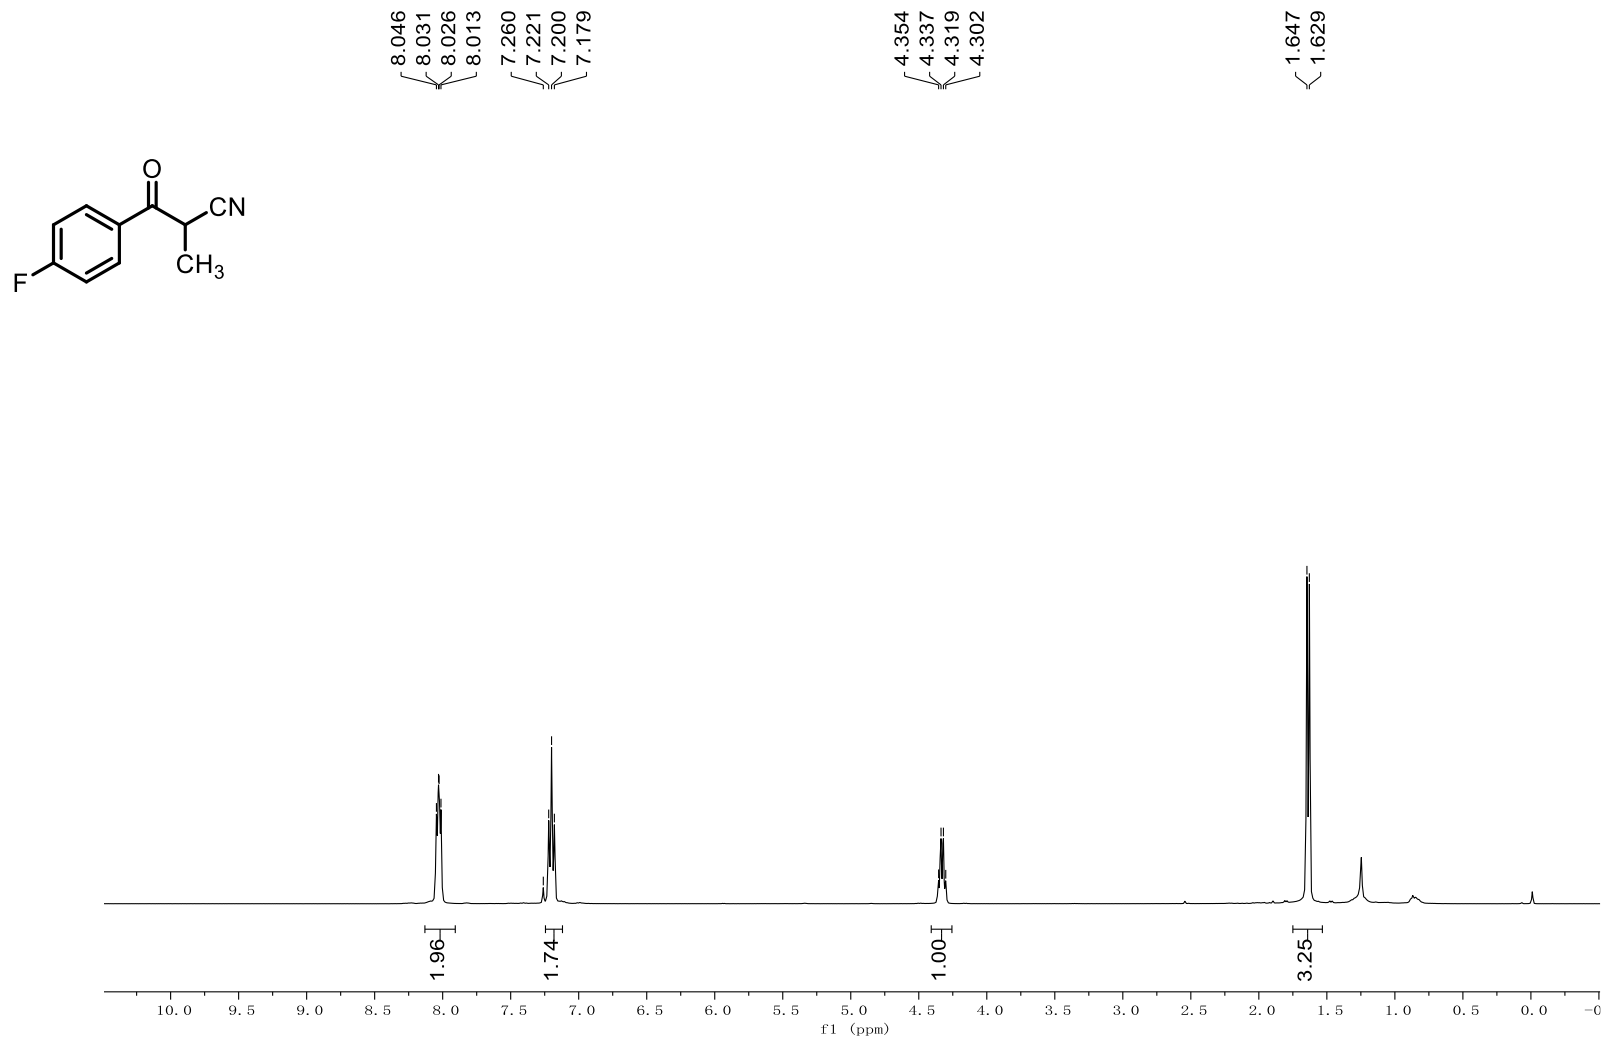

<sup>13</sup>C NMR (100 MHz, CDCl<sub>3</sub>) spectrum of 3-(4-Fluorophenyl)-2-methyl-3-oxopropanenitrile (16)

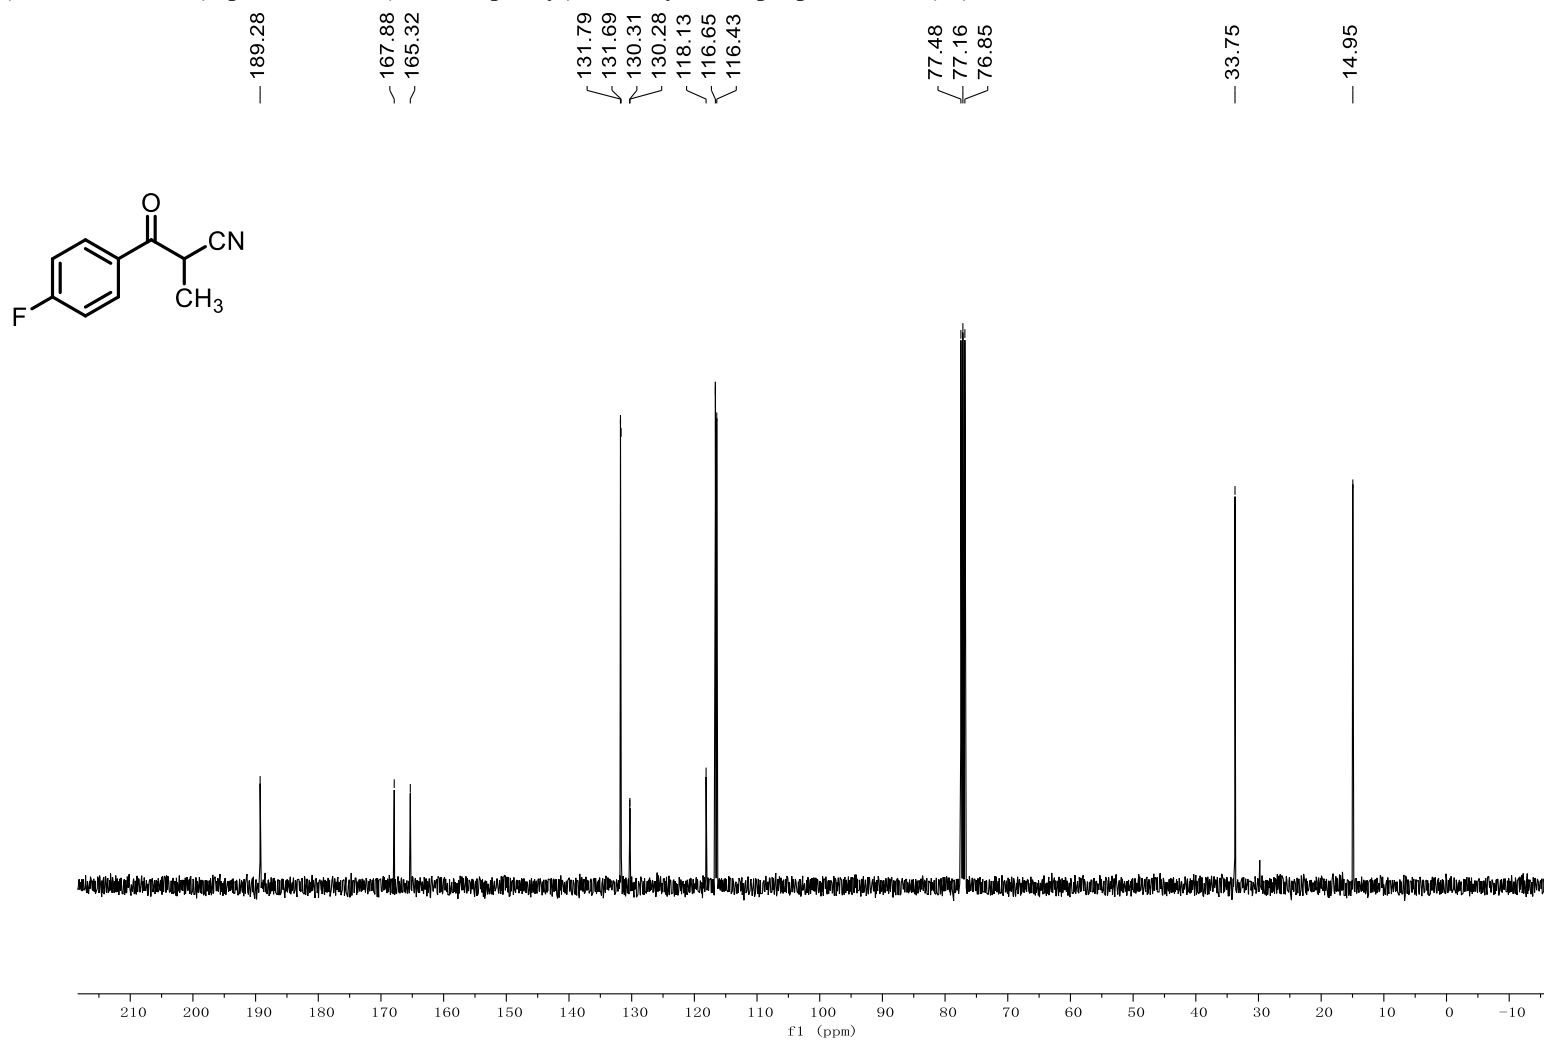

**$^{19}\text{F}$  NMR (376 MHz,  $\text{CDCl}_3$ ) spectrum of 3-(4-Fluorophenyl)-2-methyl-3-oxopropanenitrile (16)**

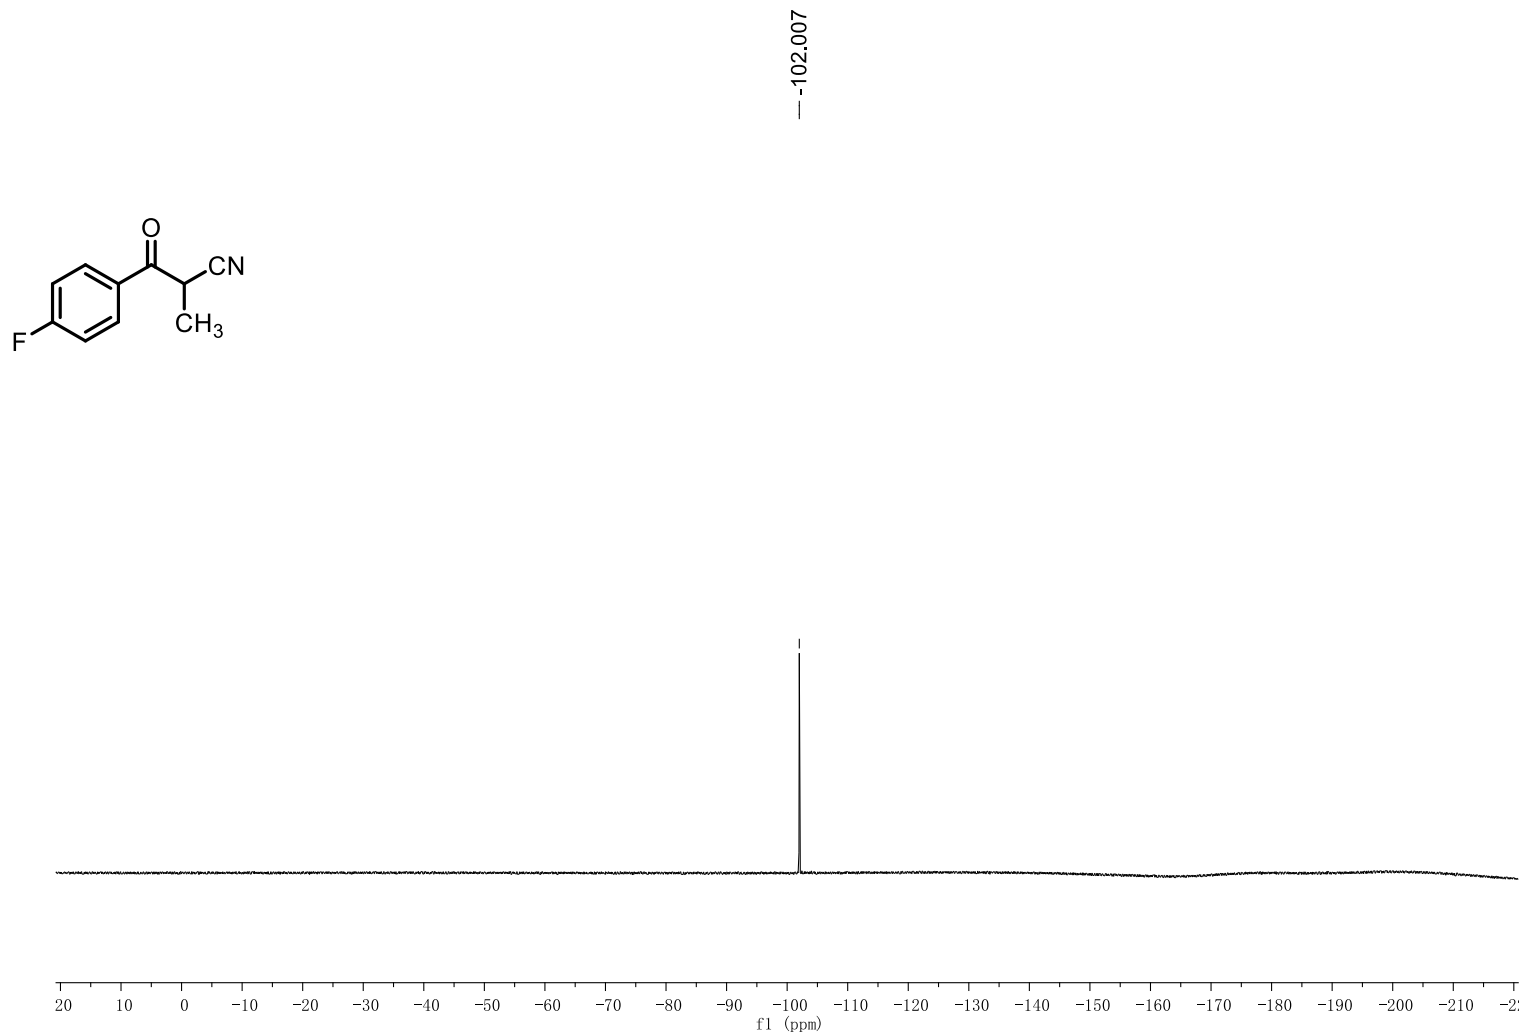

**<sup>1</sup>H NMR (400 MHz, CDCl<sub>3</sub>) spectrum of 3-(4-Chlorophenyl)-2-methyl-3-oxopropanenitrile (17)**

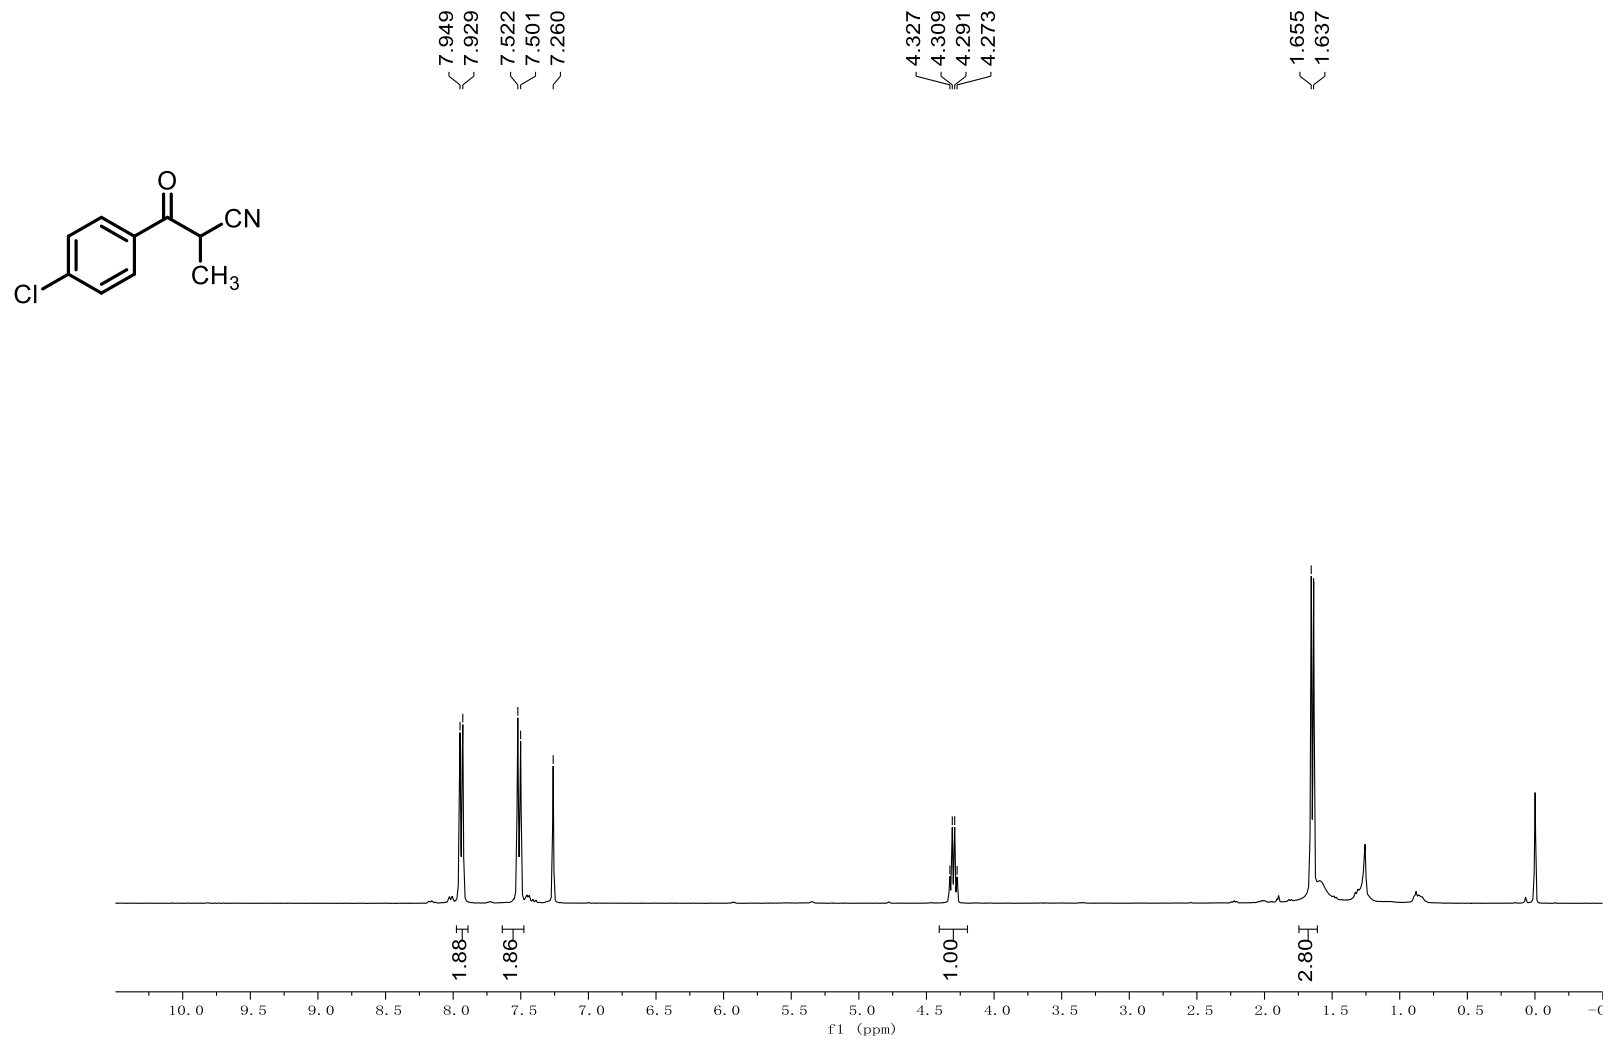

<sup>13</sup>C NMR (100 MHz, CDCl<sub>3</sub>) spectrum of 3-(4-Chlorophenyl)-2-methyl-3-oxopropanenitrile (17)

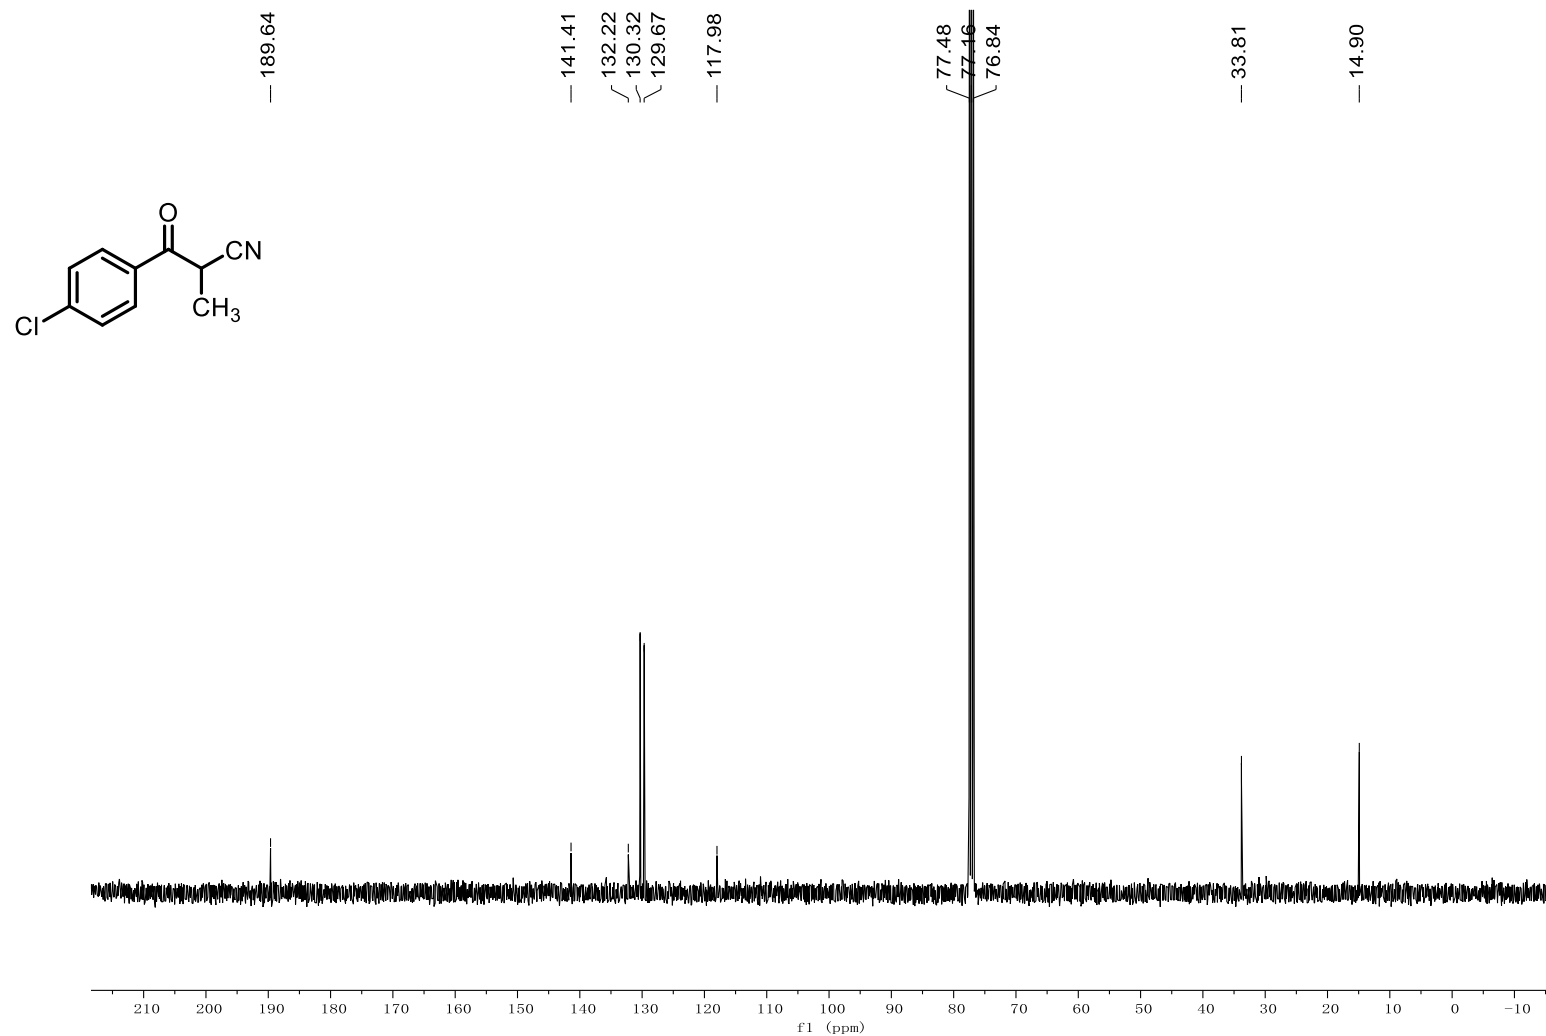

**<sup>1</sup>H NMR (400 MHz, CDCl<sub>3</sub>) spectrum of 3-(4-Bromophenyl)-2-methyl-3-oxopropanenitrile (18)**

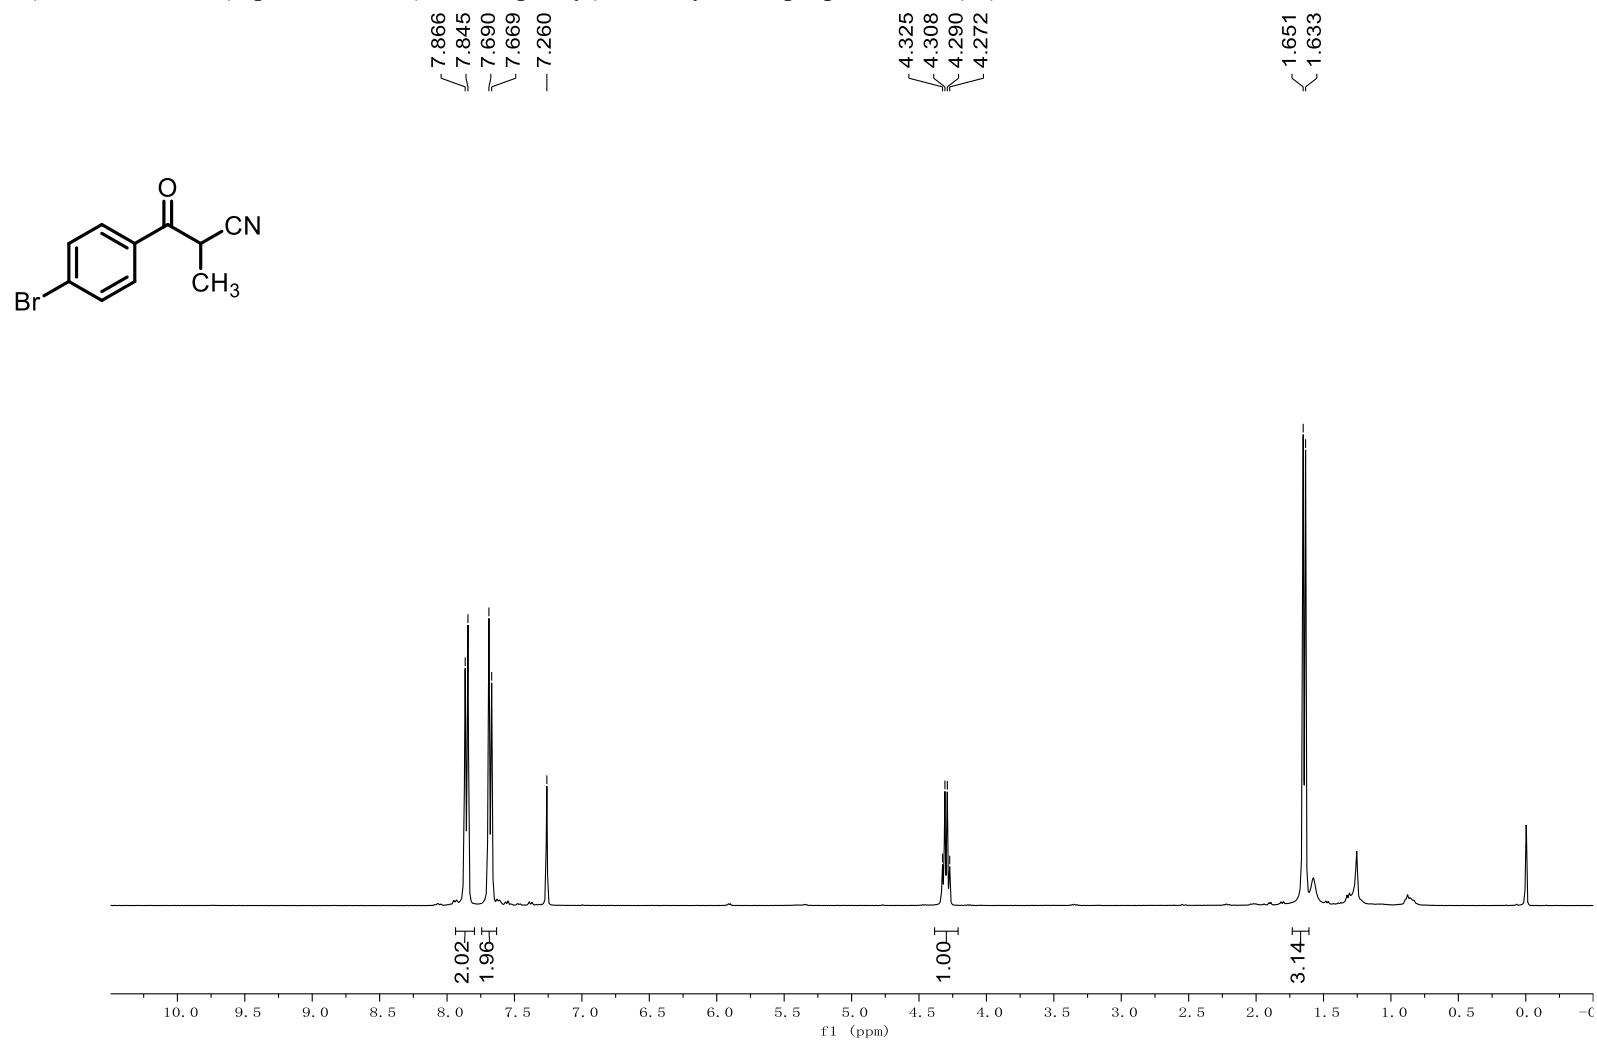

<sup>13</sup>C NMR (100 MHz, CDCl<sub>3</sub>) spectrum of 3-(4-Bromophenyl)-2-methyl-3-oxopropanenitrile (18)

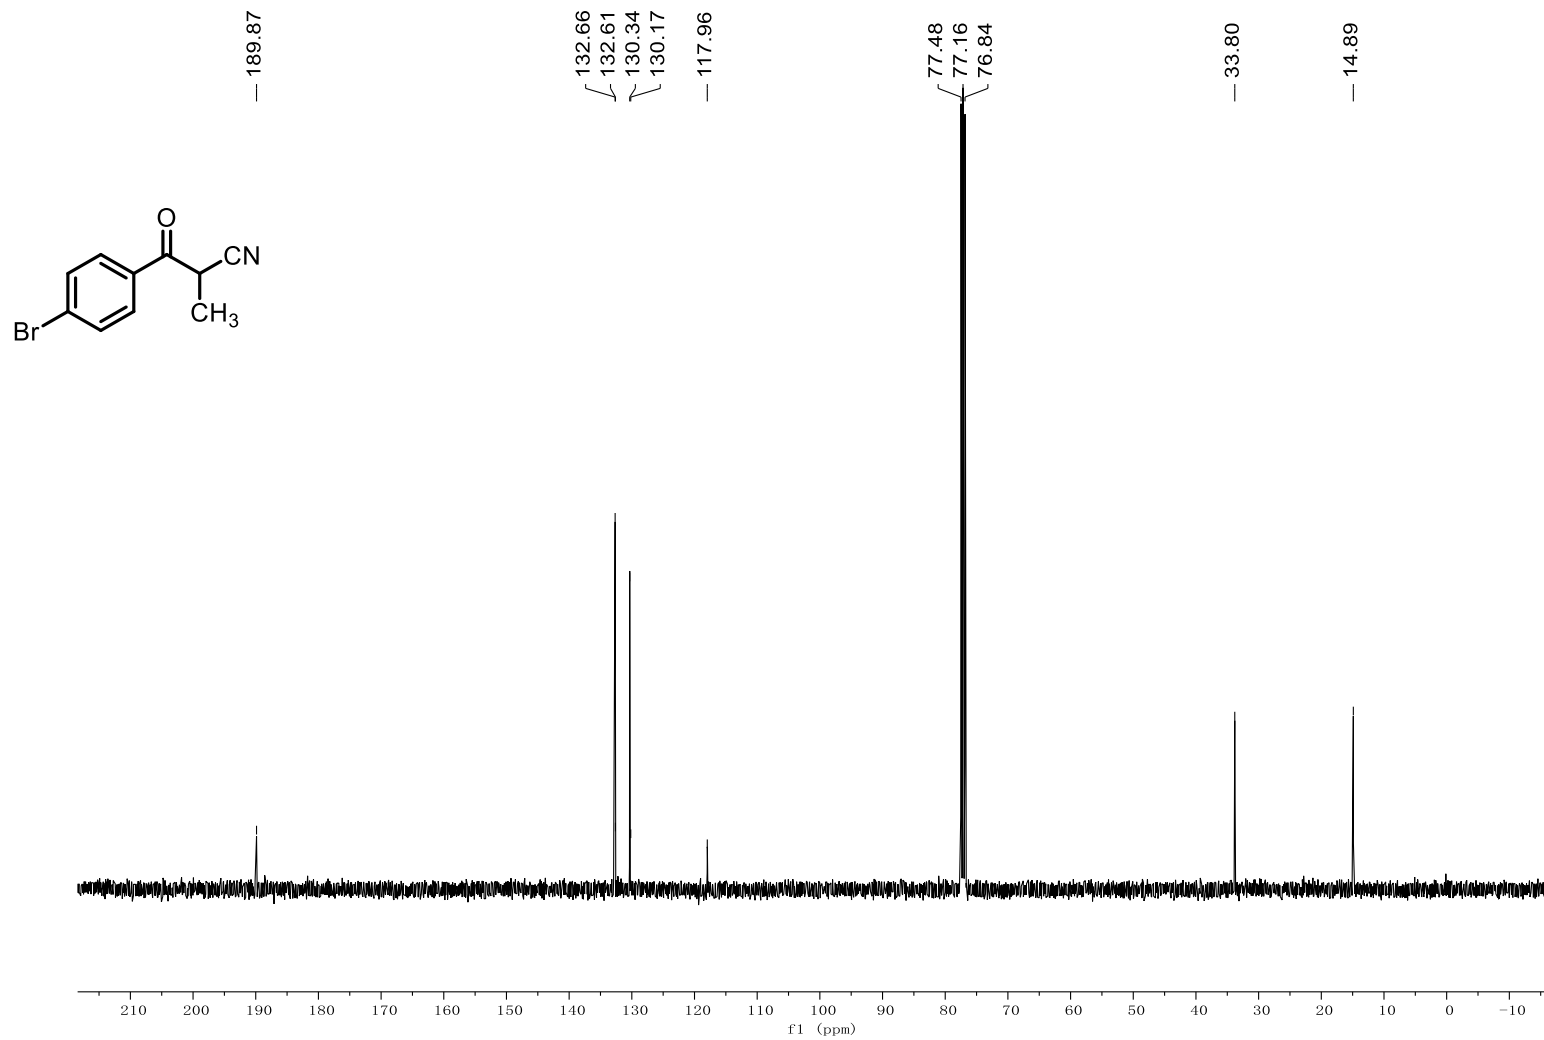

<sup>1</sup>H NMR (400 MHz, CDCl<sub>3</sub>) spectrum of 2-Methyl-3-(naphthalen-2-yl)-3-oxopropanenitrile (19)

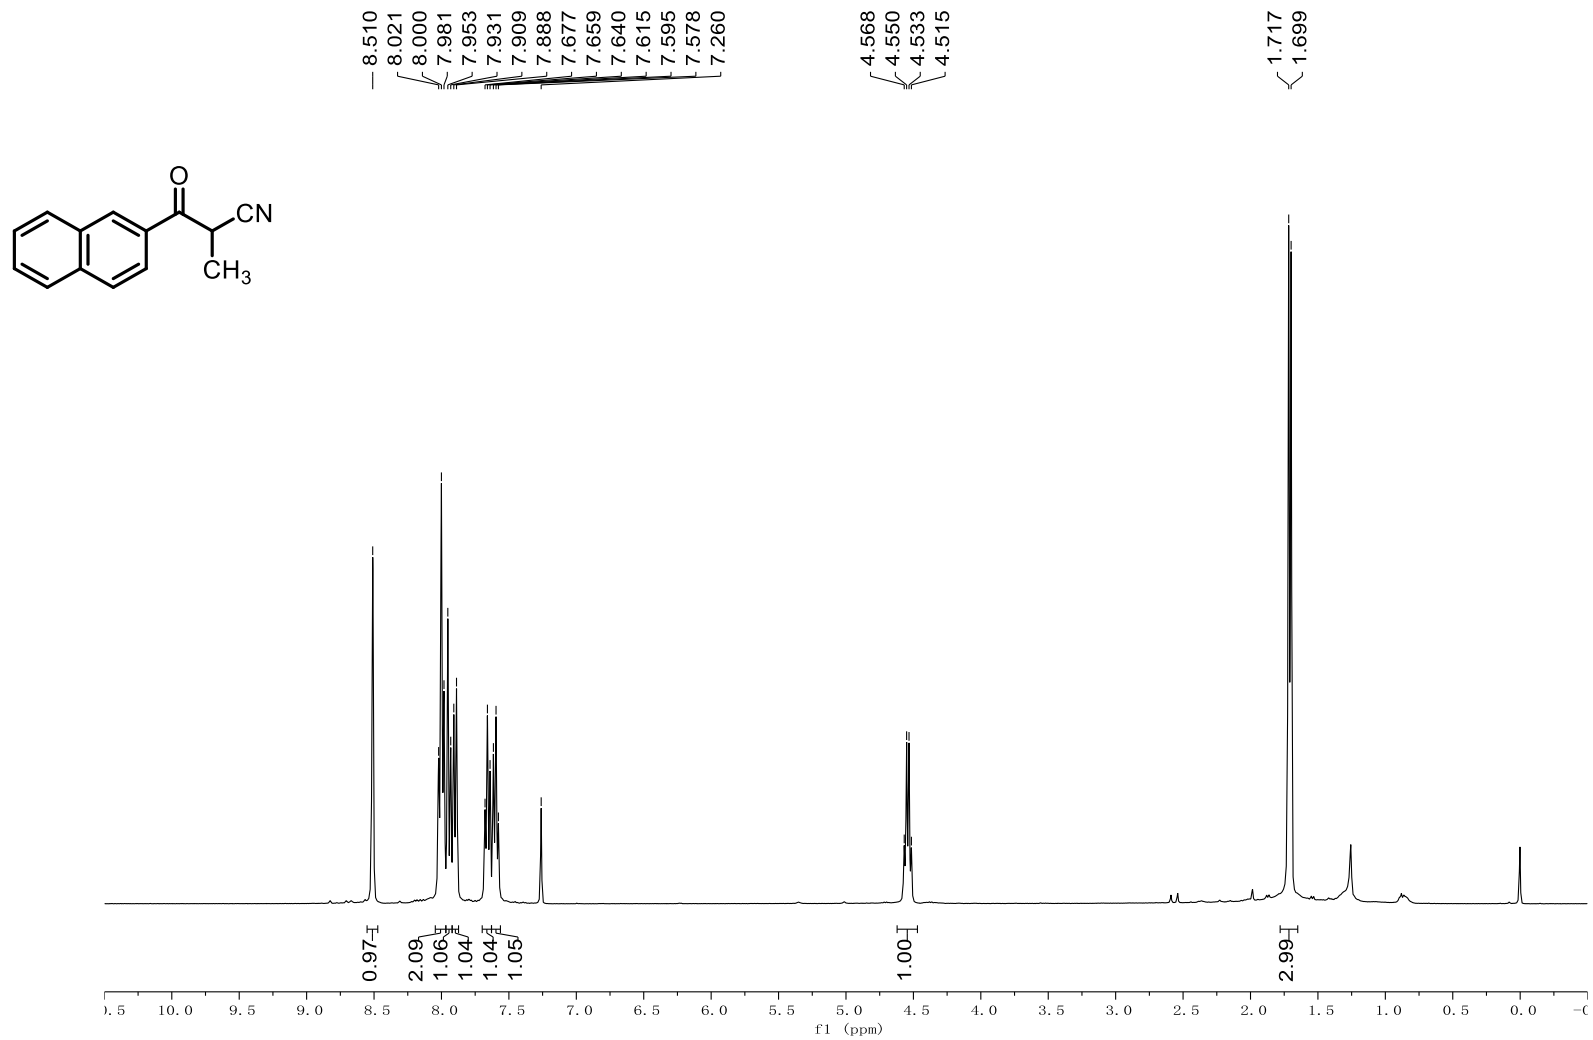

<sup>13</sup>C NMR (100 MHz, CDCl<sub>3</sub>) spectrum of 2-Methyl-3-(naphthalen-2-yl)-3-oxopropanenitrile (19)

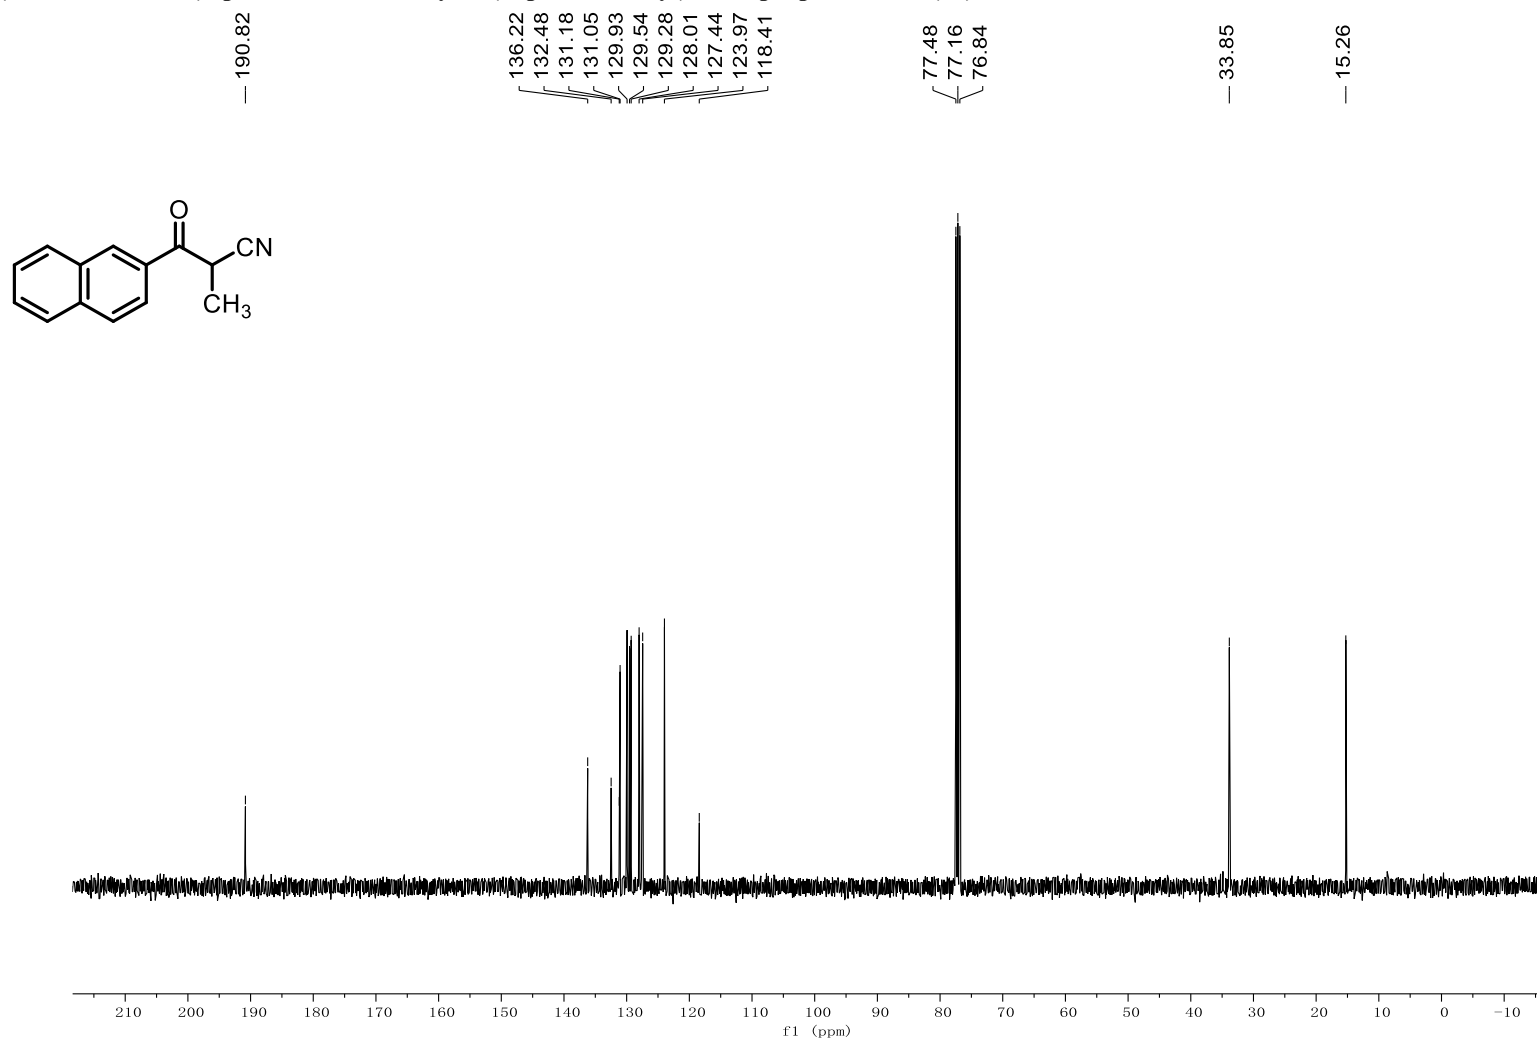

<sup>1</sup>H NMR (400 MHz, CDCl<sub>3</sub>) spectrum of 3-([1,1'-Biphenyl]-4-yl)-2-methyl-3-oxopropanenitrile (20)

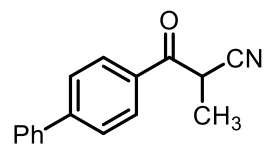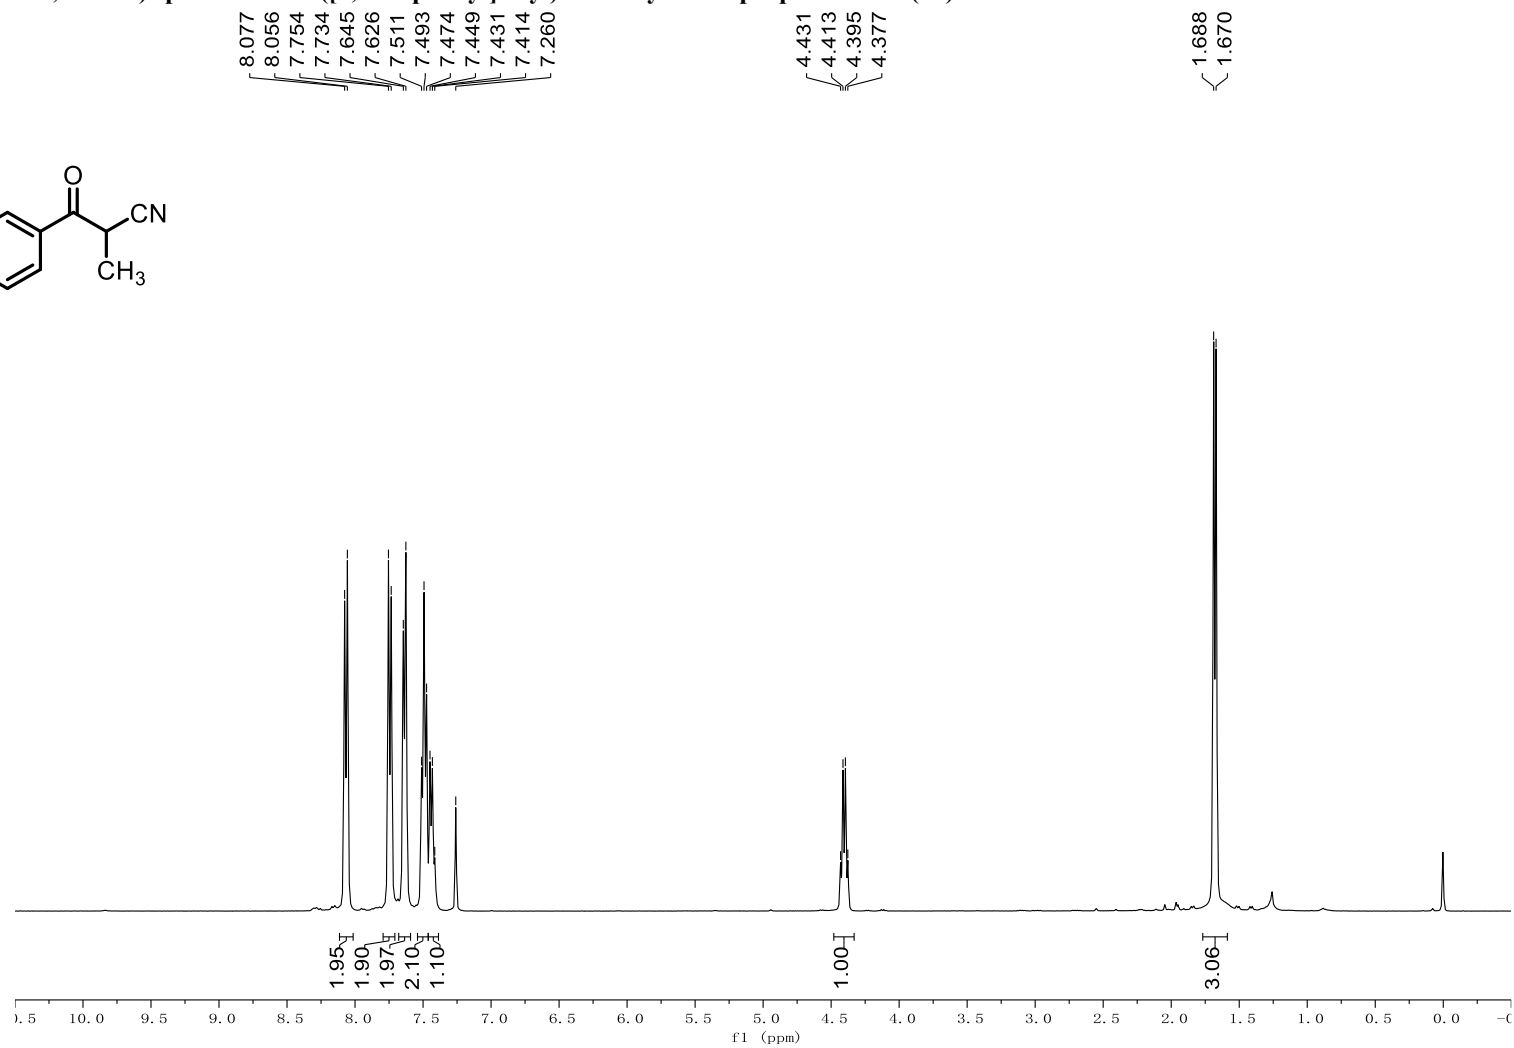

<sup>13</sup>C NMR (100 MHz, CDCl<sub>3</sub>) spectrum of 3-([1,1'-Biphenyl]-4-yl)-2-methyl-3-oxopropanenitrile (20)

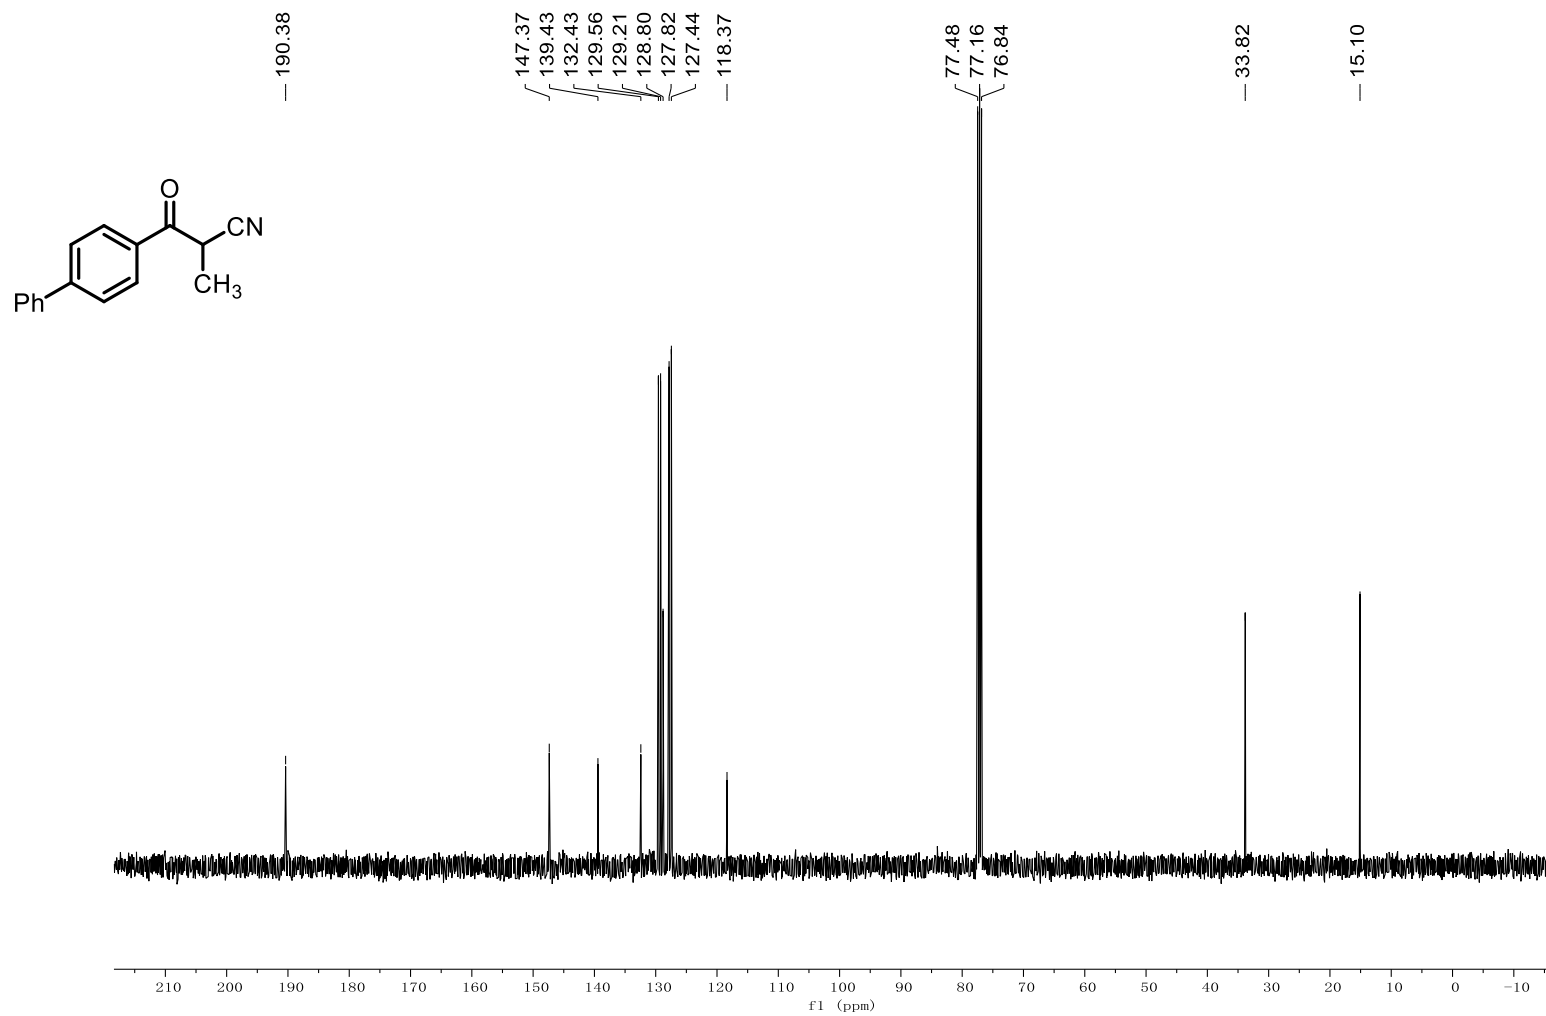

<sup>1</sup>H NMR (400 MHz, CDCl<sub>3</sub>) spectrum of methyl 5-(2-Cyanopropanoyl)-2-methoxybenzoate (21)

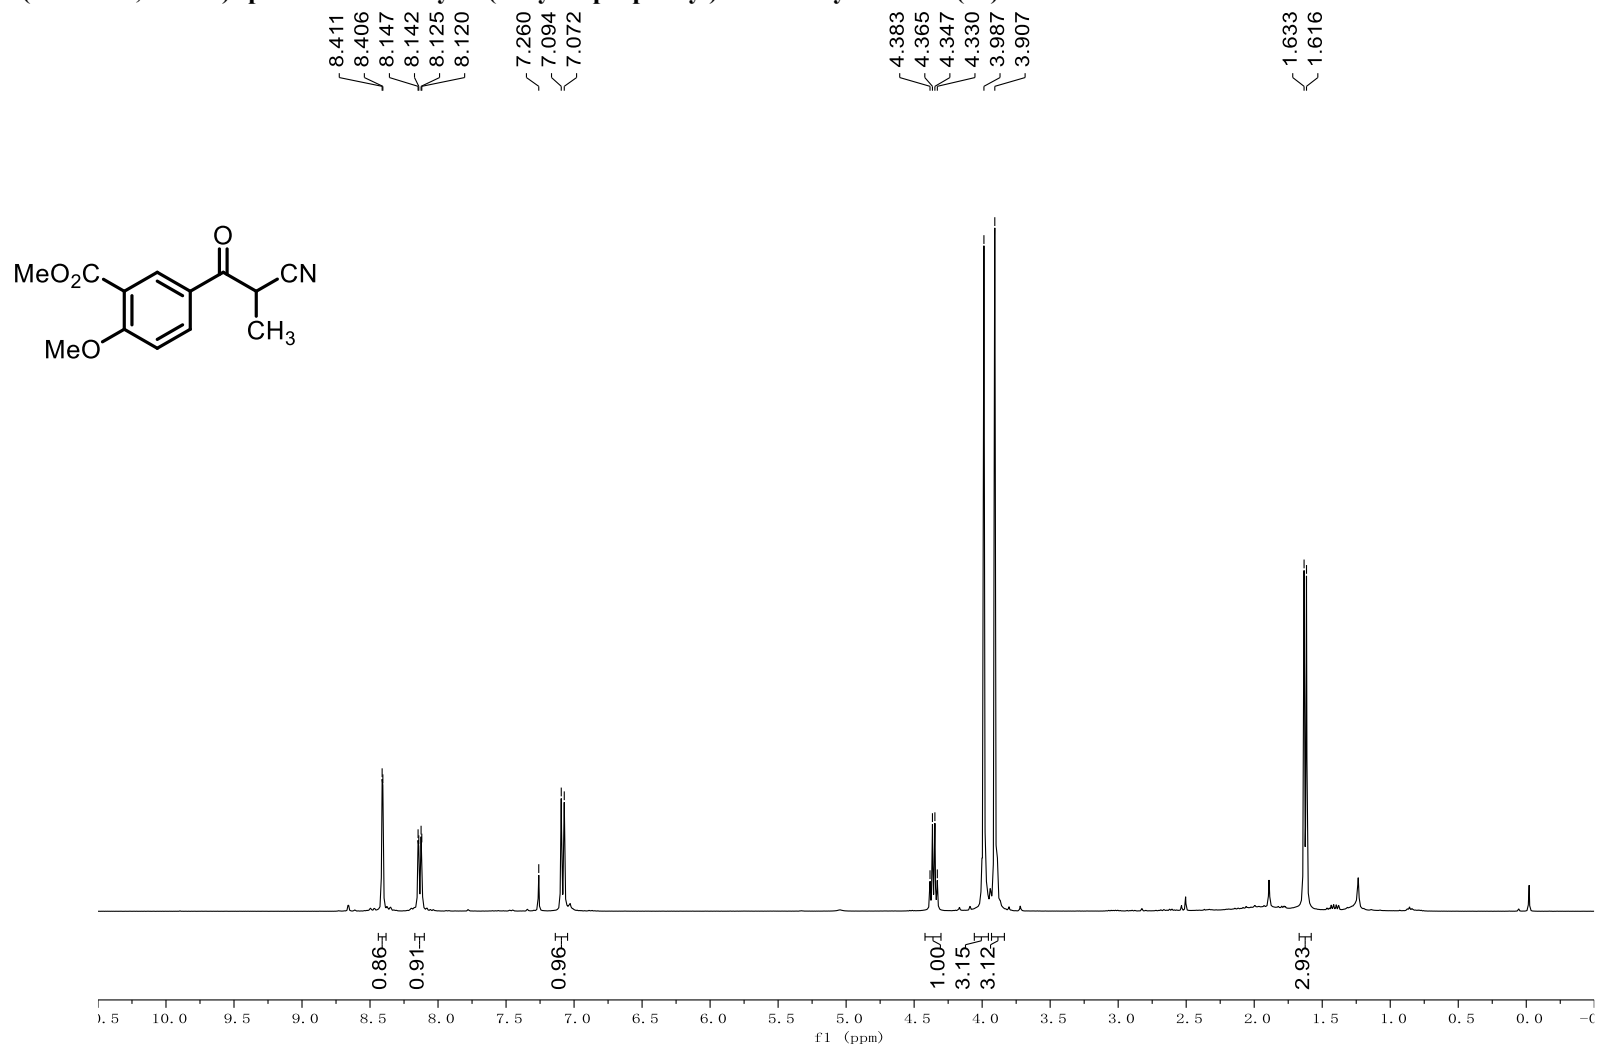

**$^{13}\text{C}$  NMR (100 MHz,  $\text{CDCl}_3$ ) spectrum of methyl 5-(2-Cyanopropanoyl)-2-methoxybenzoate (21)**

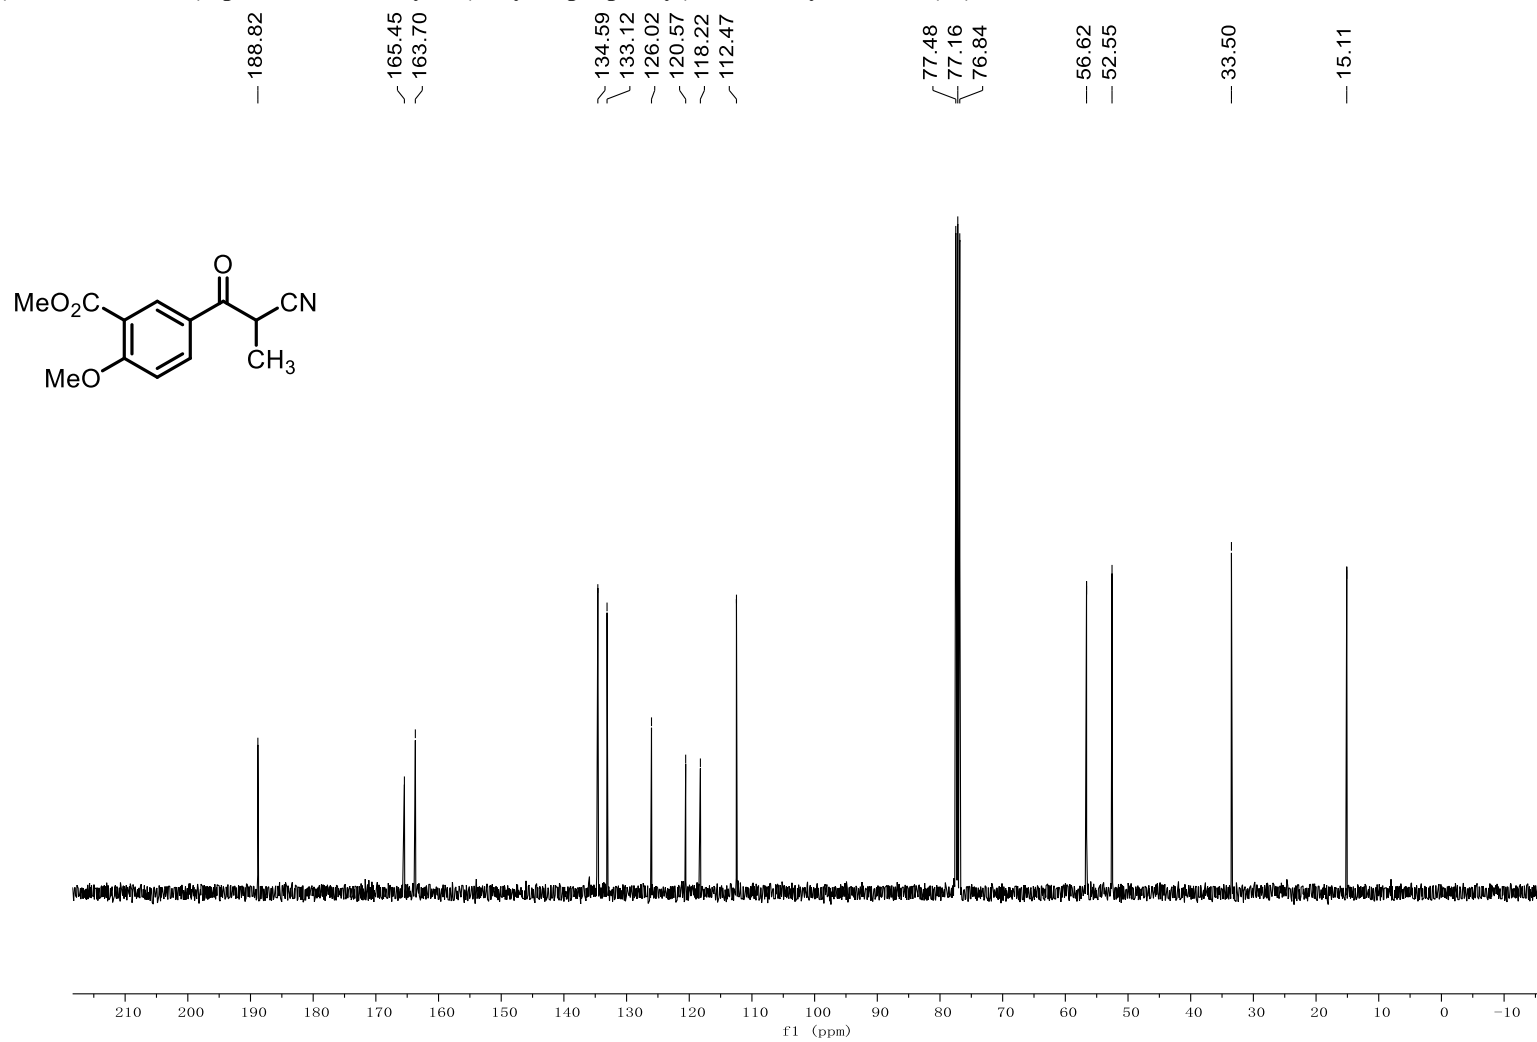

**<sup>1</sup>H NMR (400 MHz, CDCl<sub>3</sub>) spectrum of 3-(2,3-Dihydrobenzofuran-5-yl)-2-methyl-3-oxopropanenitrile (22)**

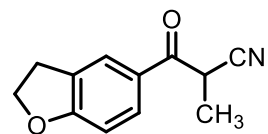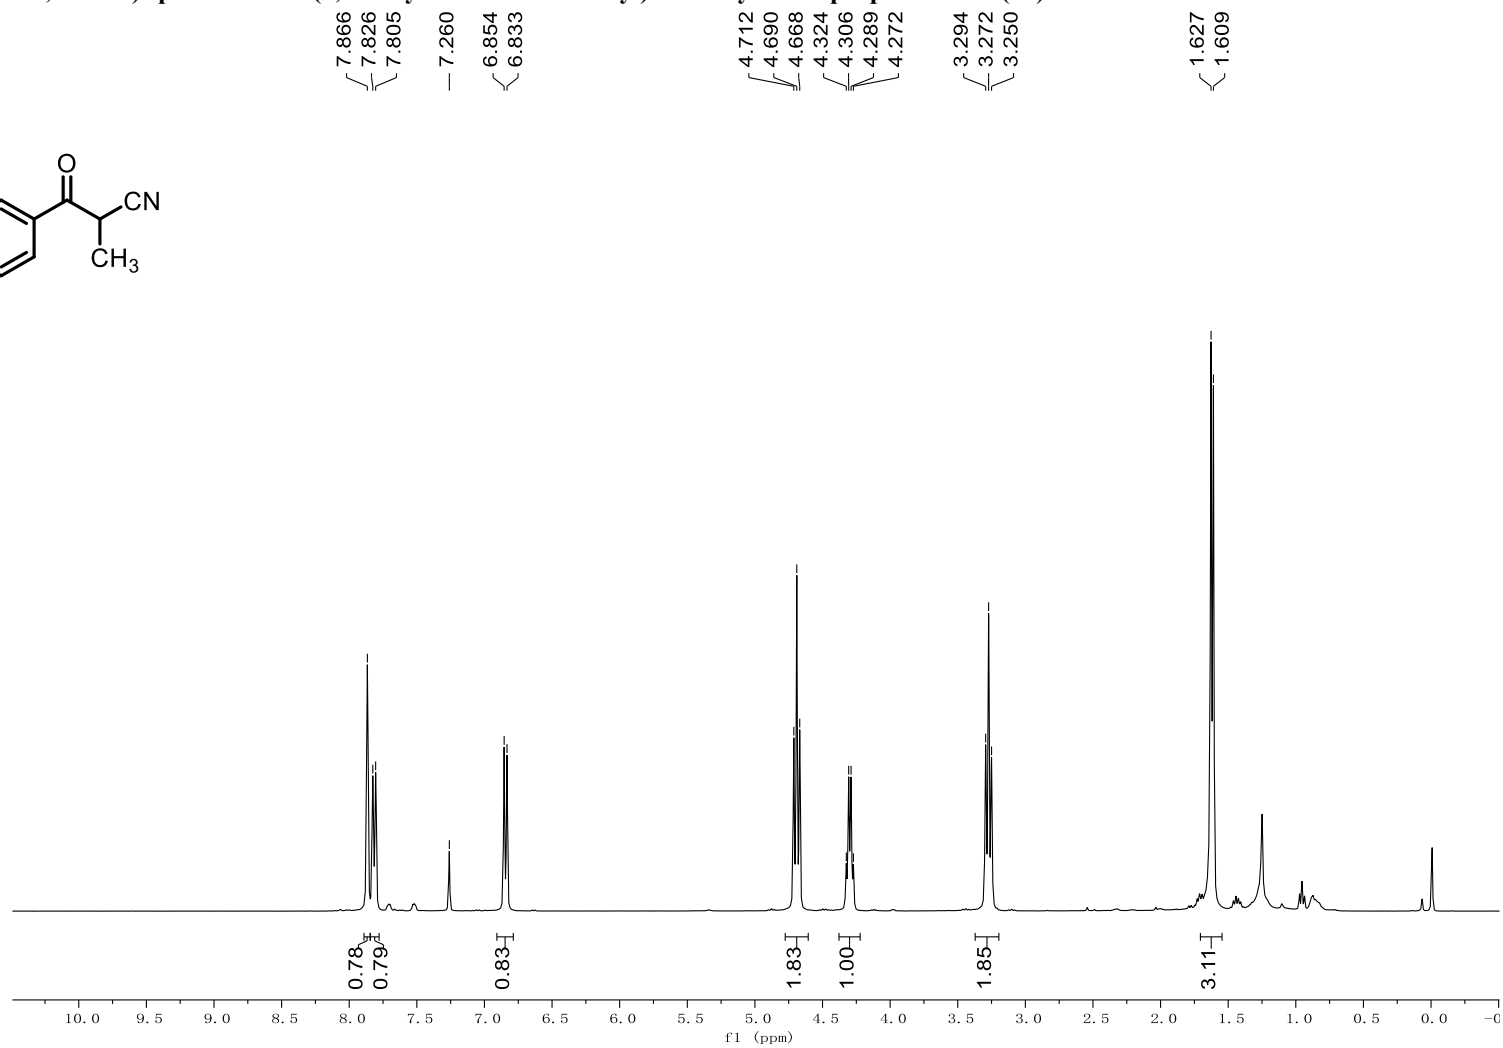

<sup>13</sup>C NMR (100 MHz, CDCl<sub>3</sub>) spectrum of 3-(2,3-Dihydrobenzofuran-5-yl)-2-methyl-3-oxopropanenitrile (22)

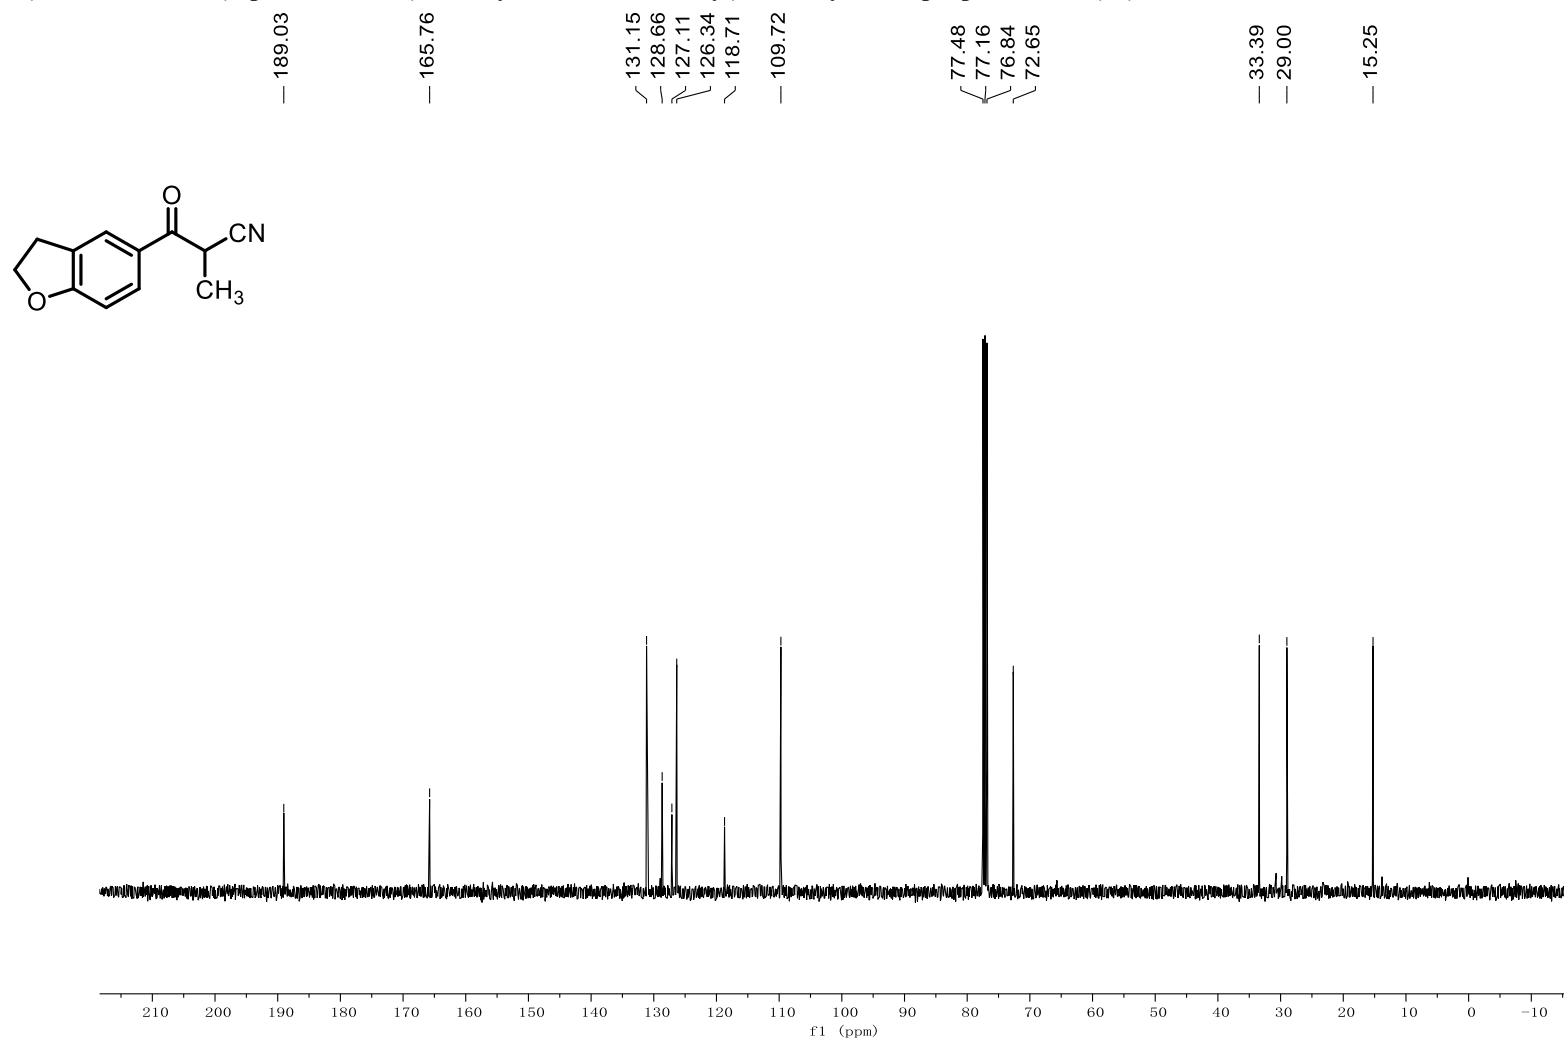

**<sup>1</sup>H NMR (400 MHz, CDCl<sub>3</sub>) spectrum of 3-(2,3-Dihydrobenzo[*b*][1,4]dioxin-6-yl)-2-methyl-3-oxopropanenitrile (23)**

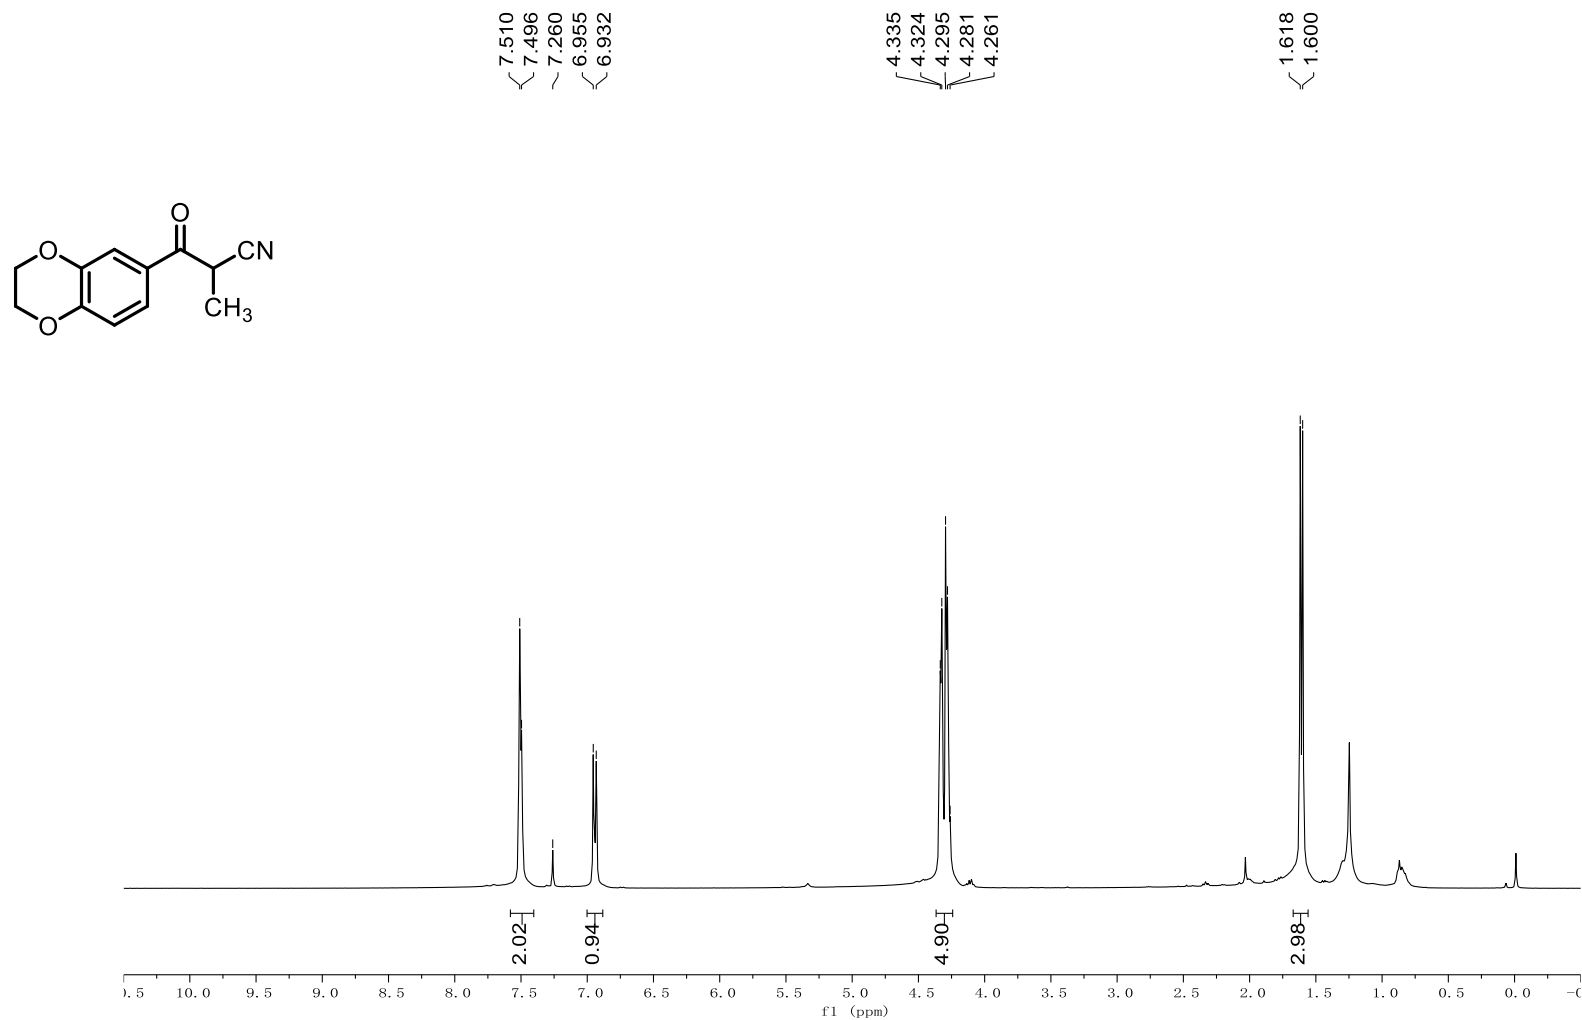

<sup>13</sup>C NMR (100 MHz, CDCl<sub>3</sub>) spectrum of 3-(2,3-Dihydrobenzo[b][1,4]dioxin-6-yl)-2-methyl-3-oxopropanenitrile (23)

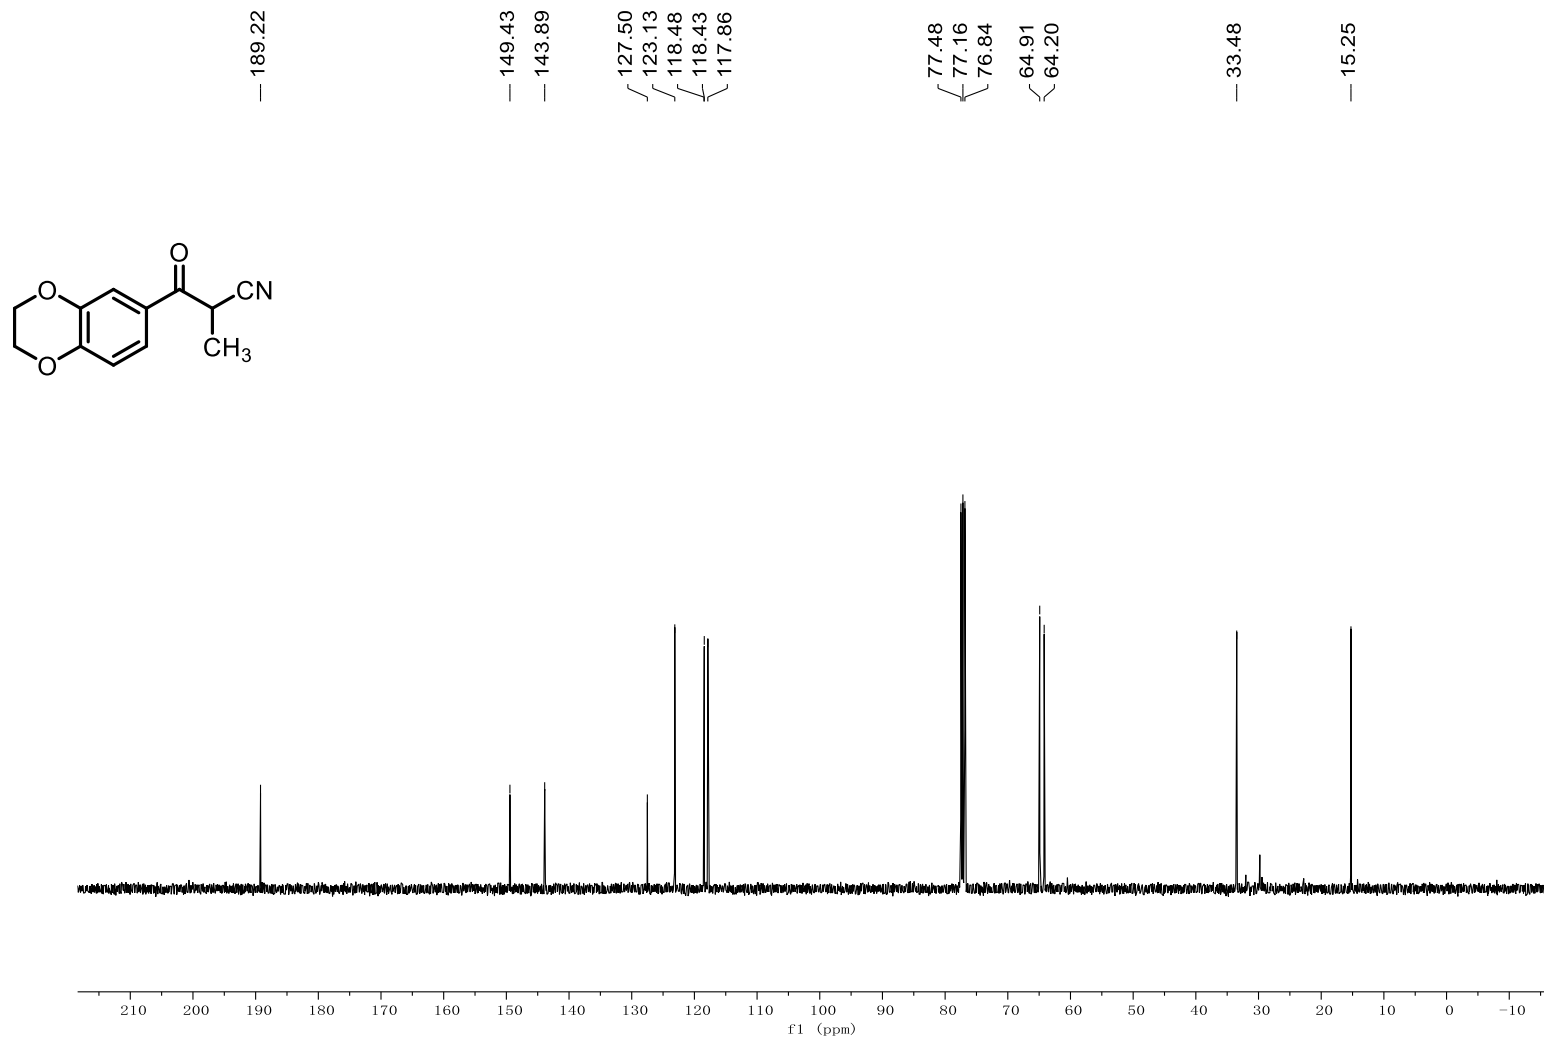

<sup>1</sup>H NMR (400 MHz, CDCl<sub>3</sub>) spectrum of 2-Methyl-3-oxo-3-(2,3,6,7-tetrahydro-1*H*,5*H*-pyrido[3,2-*ij*]quinolin-9-yl)propanenitrile (24)

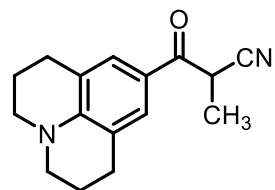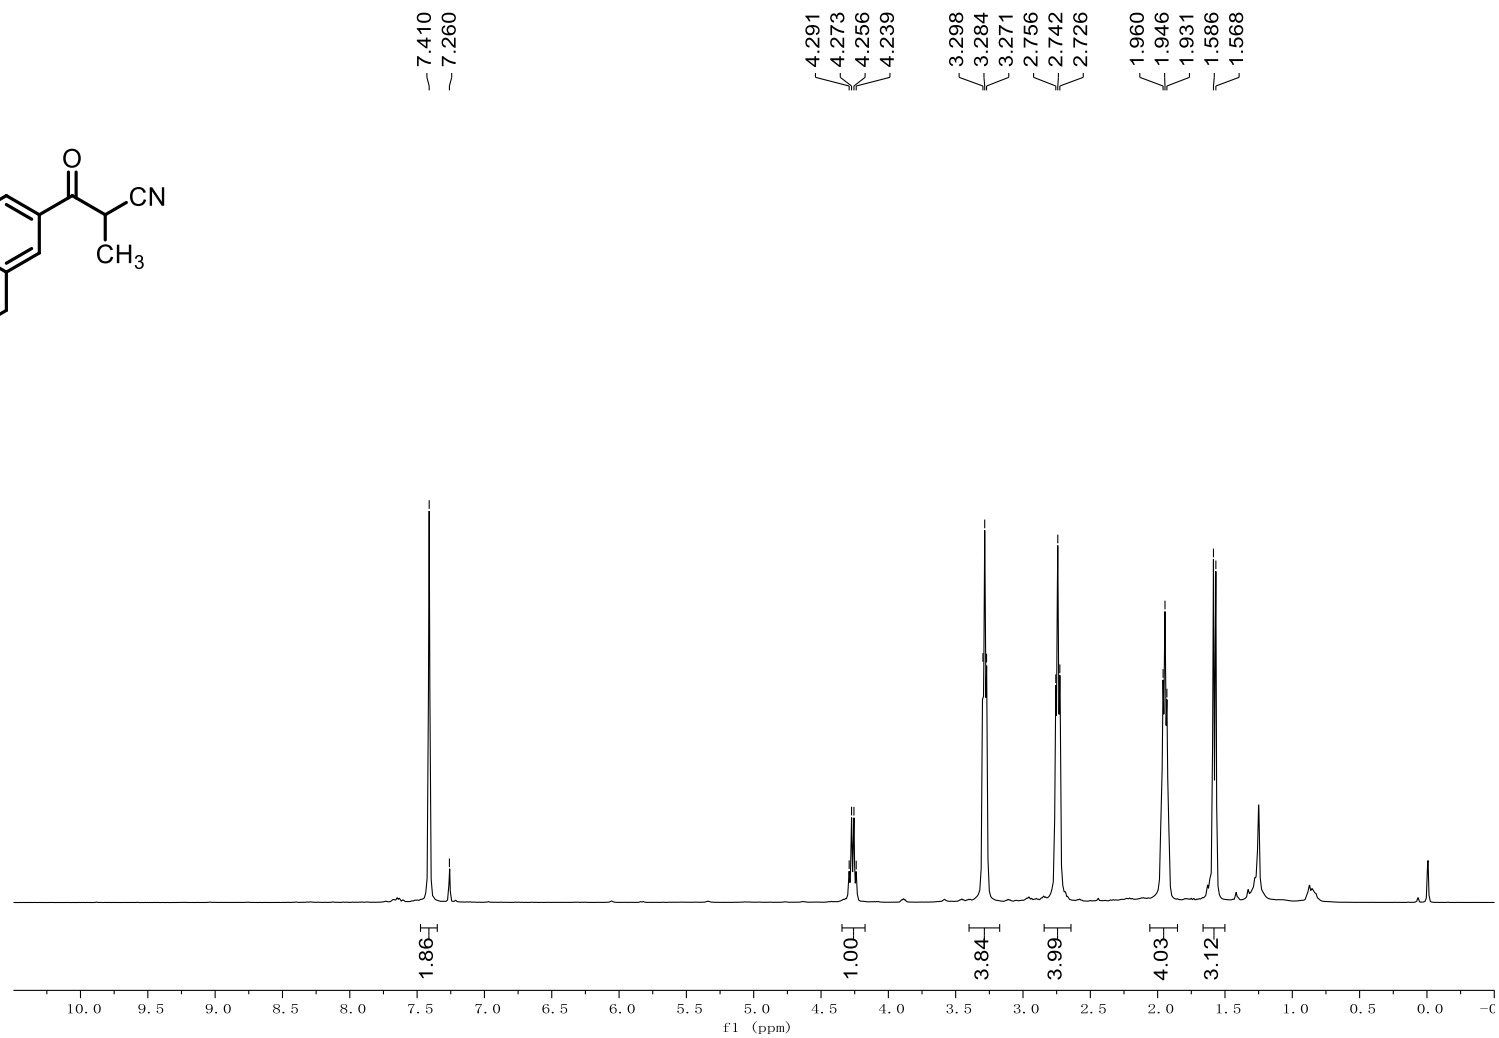

<sup>13</sup>C NMR (100 MHz, CDCl<sub>3</sub>) spectrum of 2-Methyl-3-oxo-3-(2,3,6,7-tetrahydro-1*H*,5*H*-pyrido[3,2-*ij*]quinolin-9-yl)propanenitrile (24)

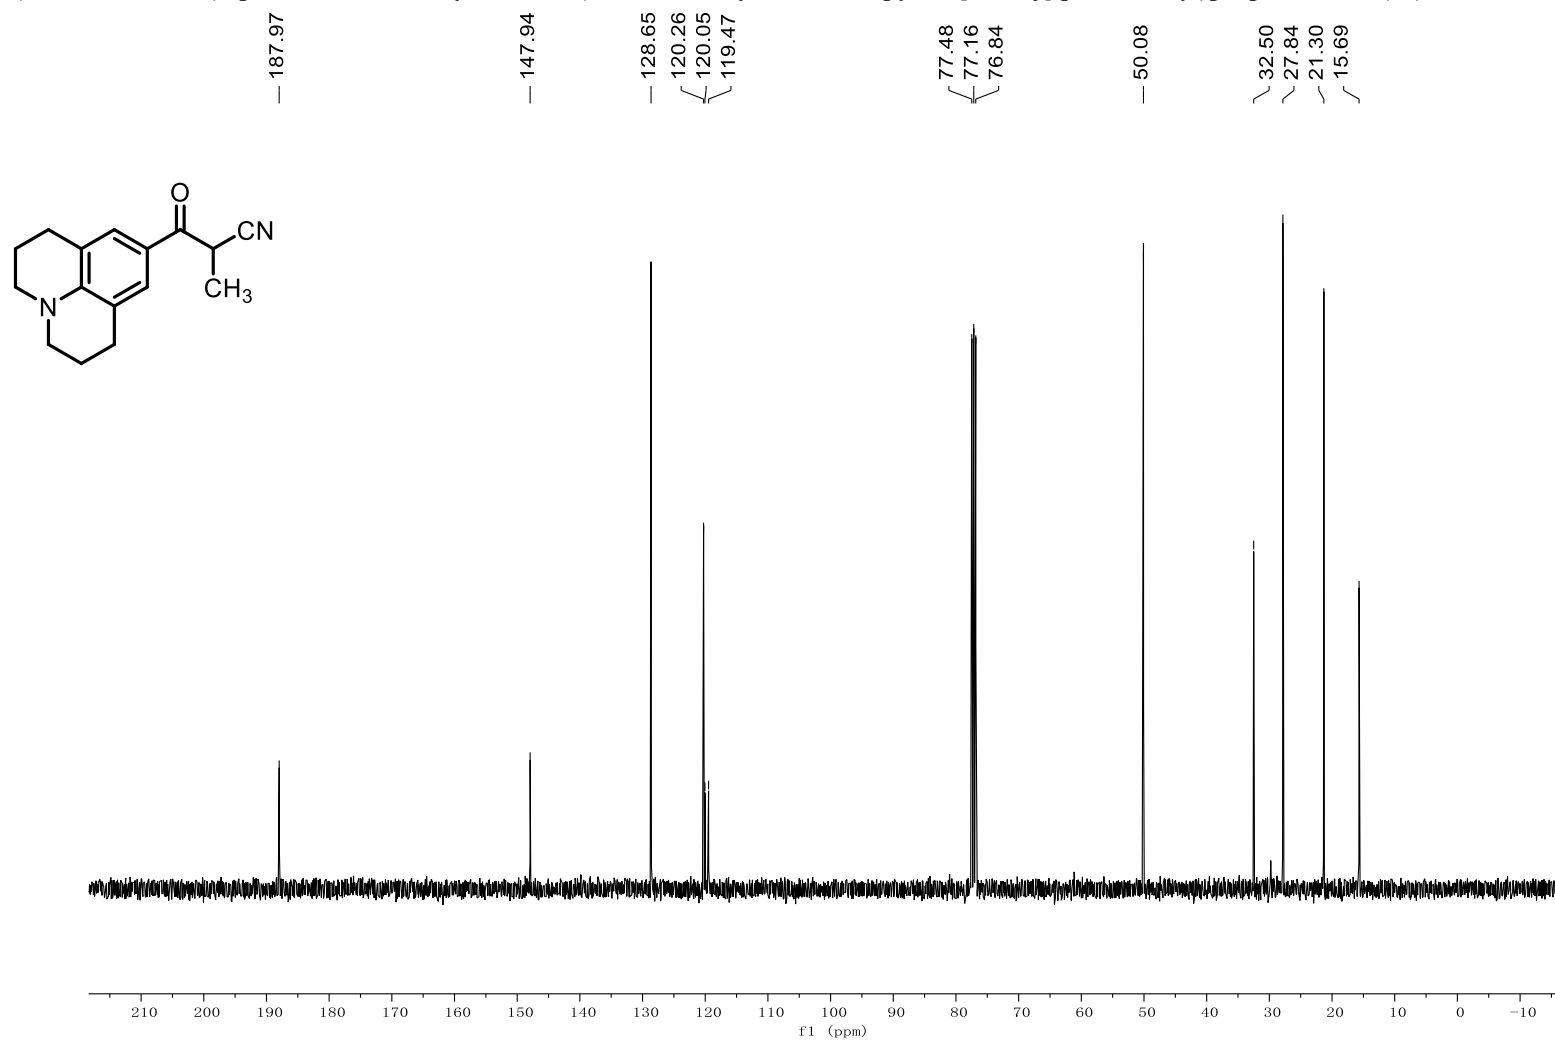

**<sup>1</sup>H NMR (400 MHz, CDCl<sub>3</sub>) spectrum of 2-Methyl-3-oxo-3-(thiophen-2-yl)propanenitrile (25)**

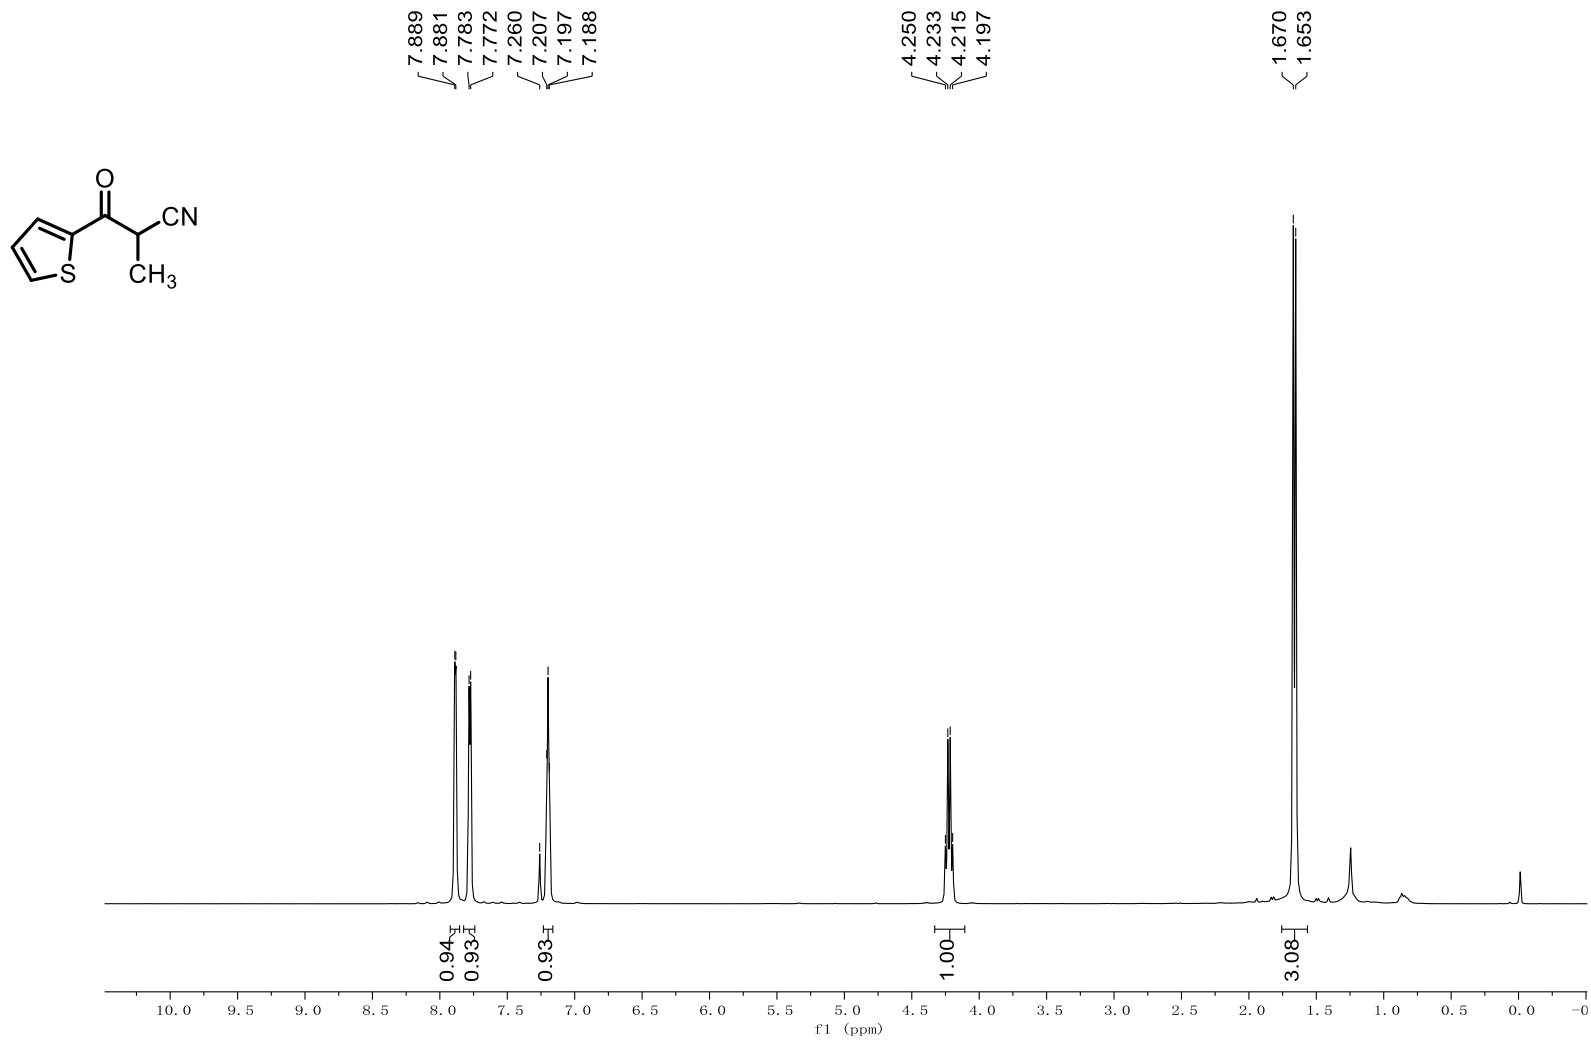

<sup>13</sup>C NMR (100 MHz, CDCl<sub>3</sub>) spectrum of 2-Methyl-3-oxo-3-(thiophen-2-yl)propanenitrile (25)

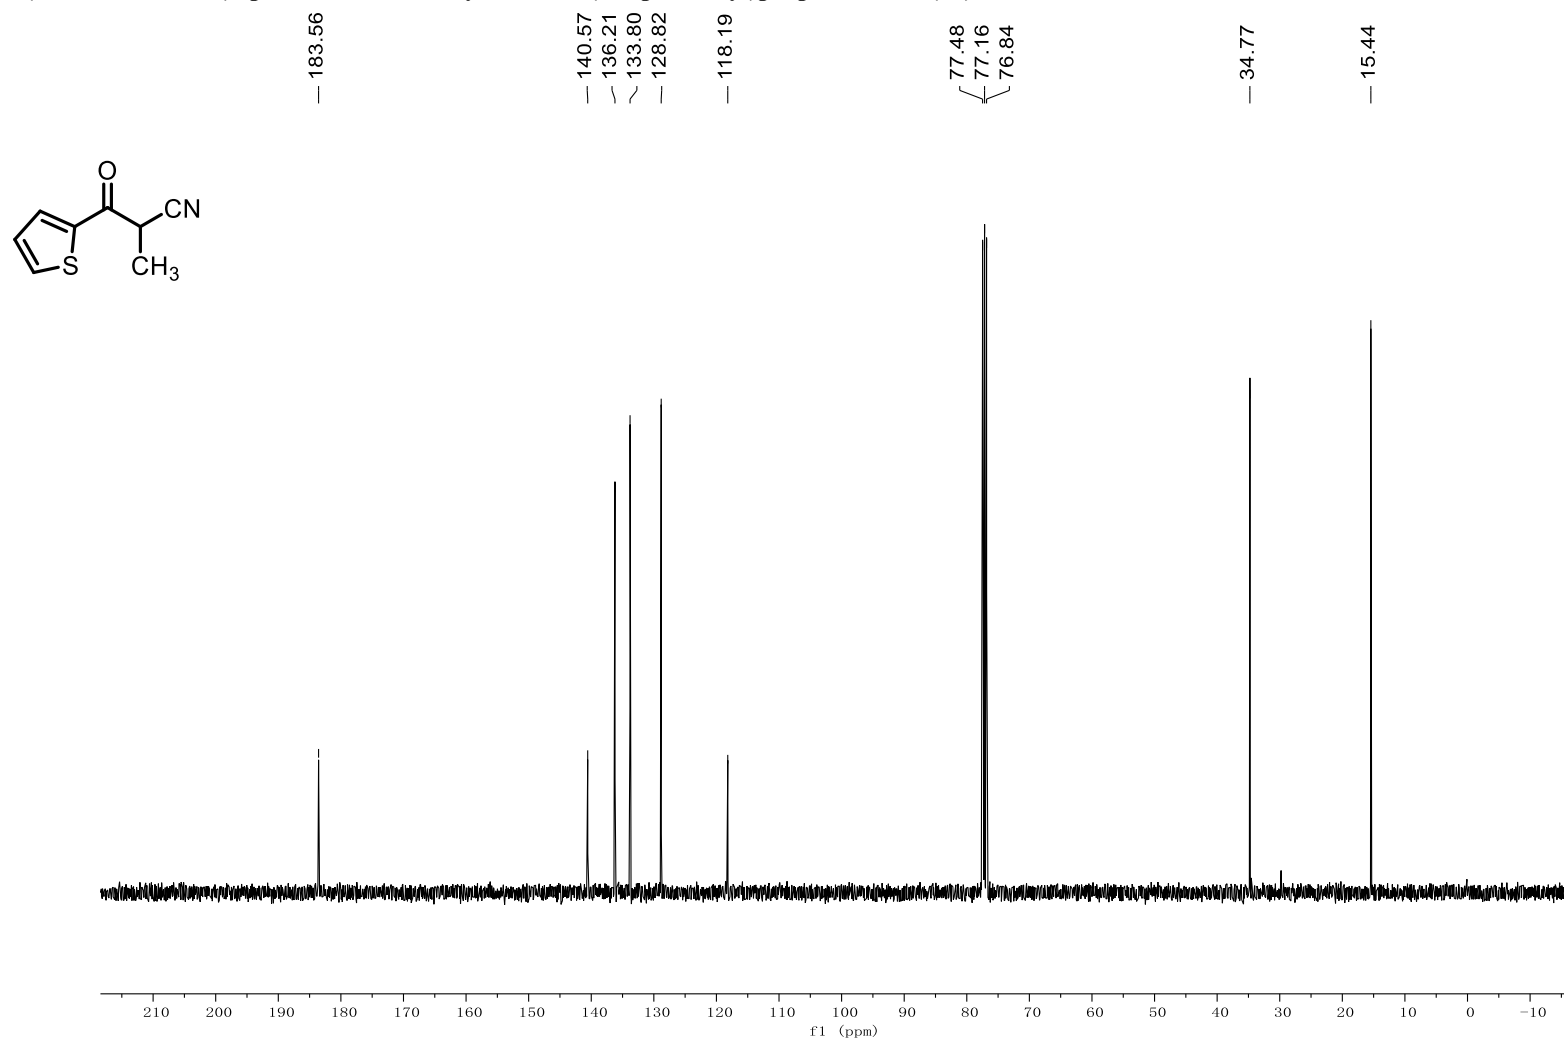

**<sup>1</sup>H NMR (400 MHz, CDCl<sub>3</sub>) spectrum of 2-Methyl-3-oxo-3-(thiophen-3-yl)propanenitrile (26)**

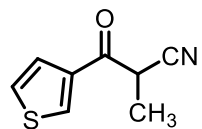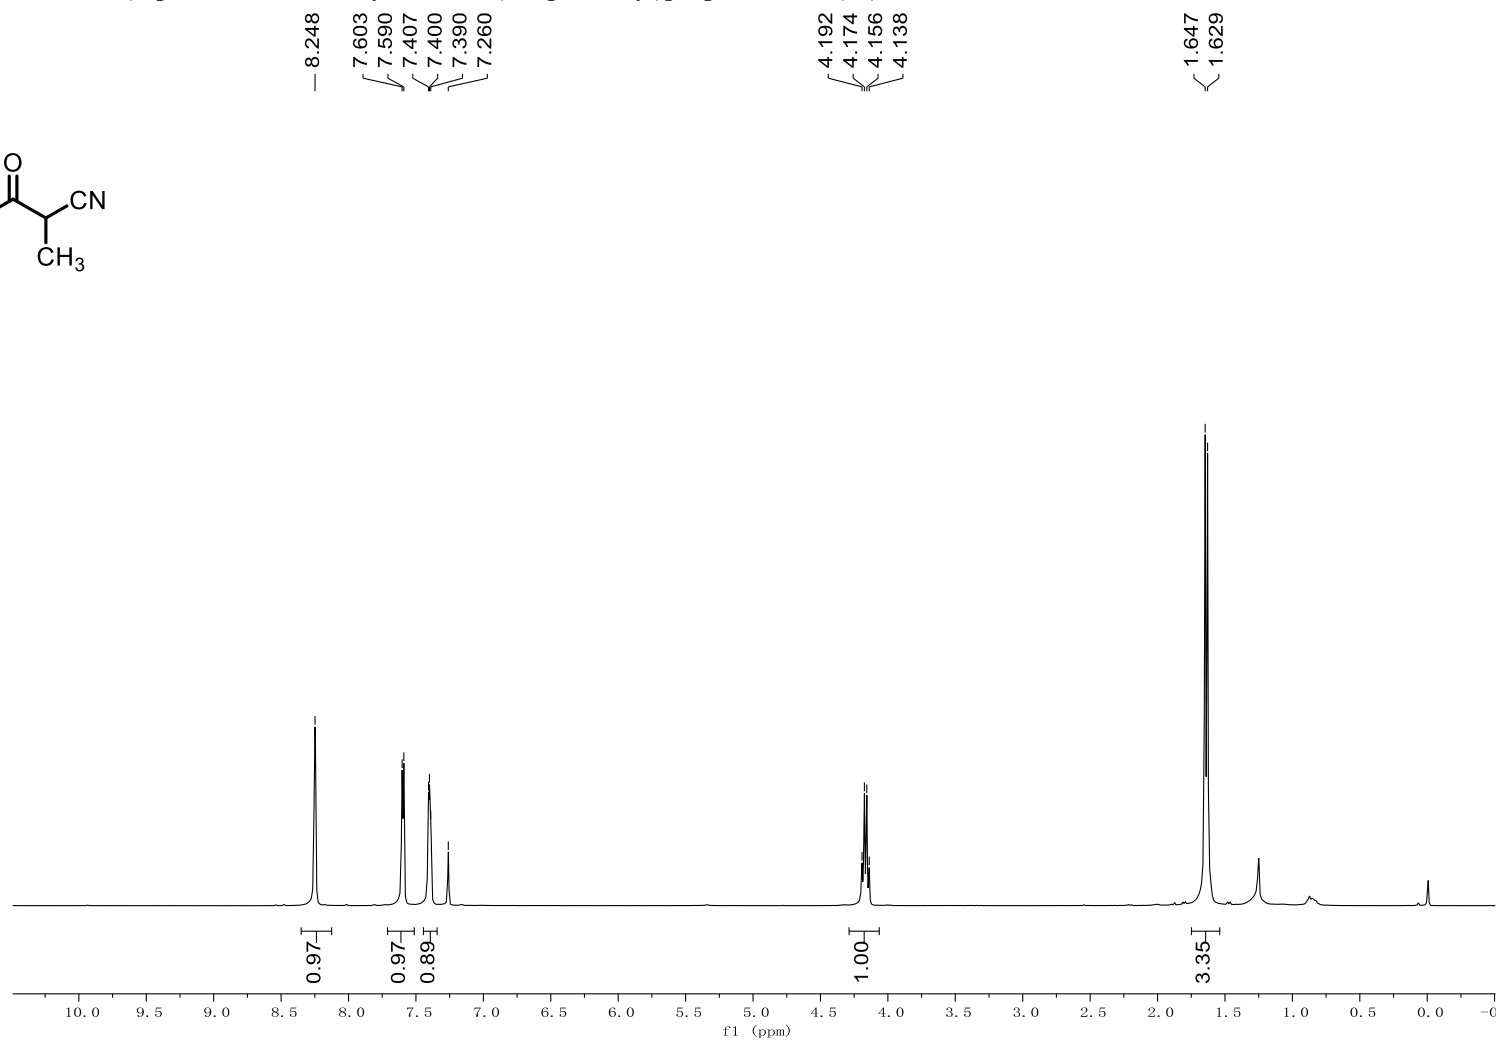

<sup>13</sup>C NMR (100 MHz, CDCl<sub>3</sub>) spectrum of 2-Methyl-3-oxo-3-(thiophen-3-yl)propanenitrile (26)

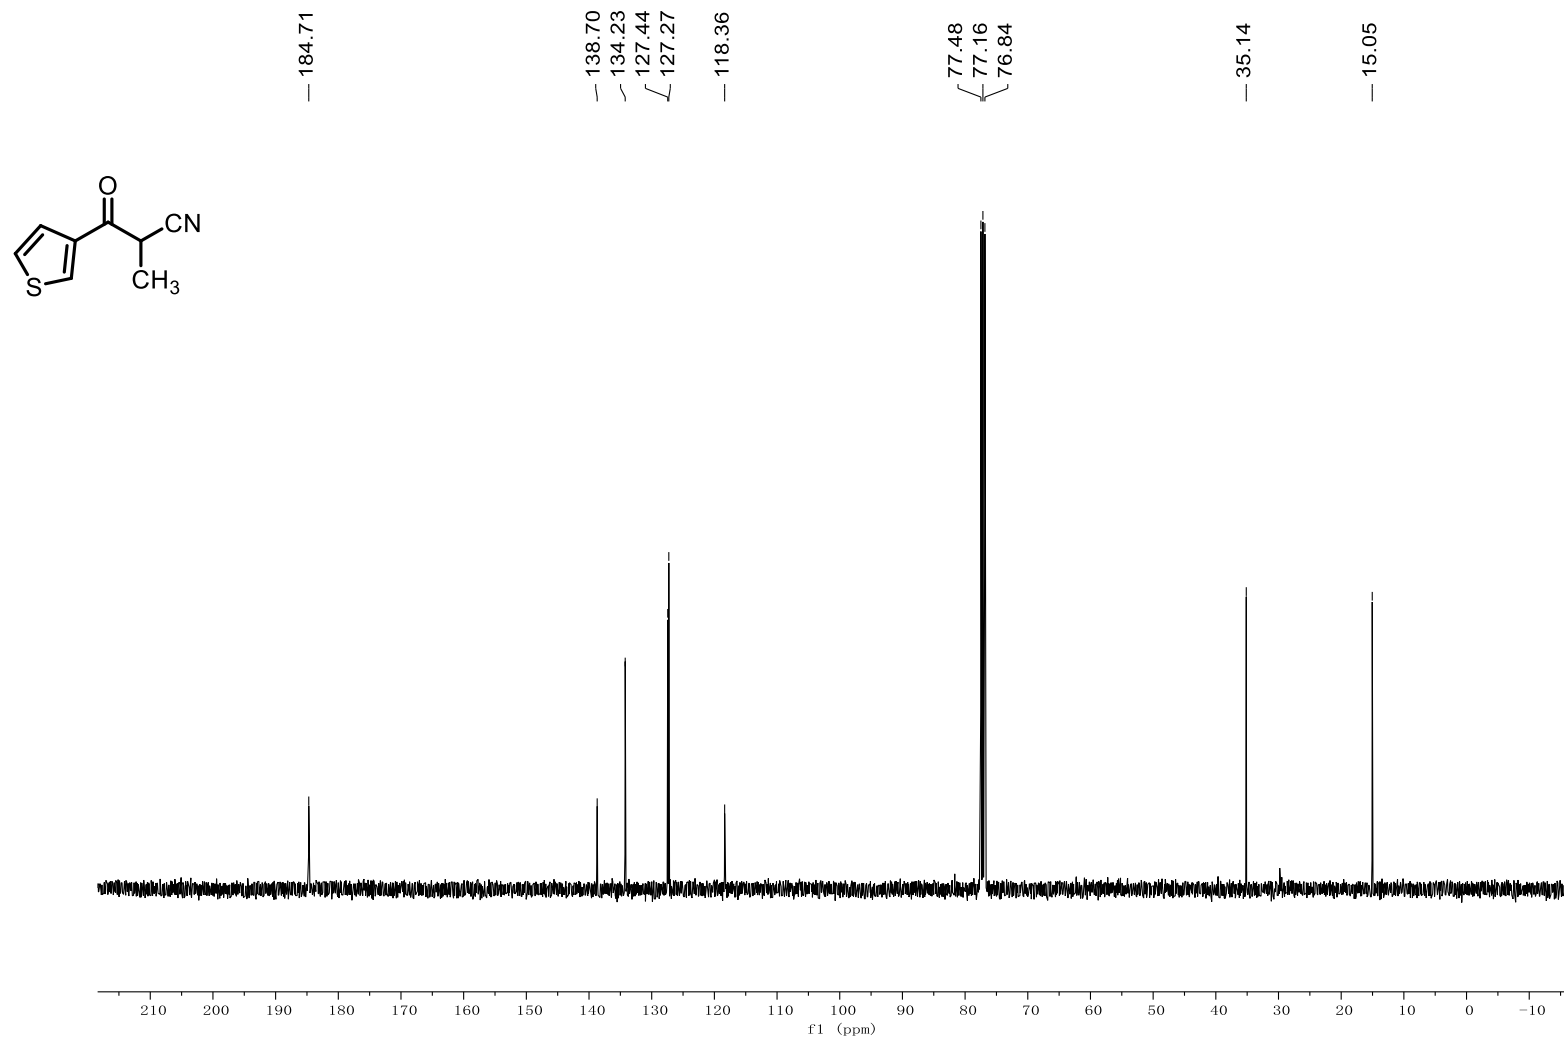

**<sup>1</sup>H NMR (400 MHz, CDCl<sub>3</sub>) spectrum of 3-(6-Methoxypyridin-3-yl)-2-methyl-3-oxopropanenitrile (27)**

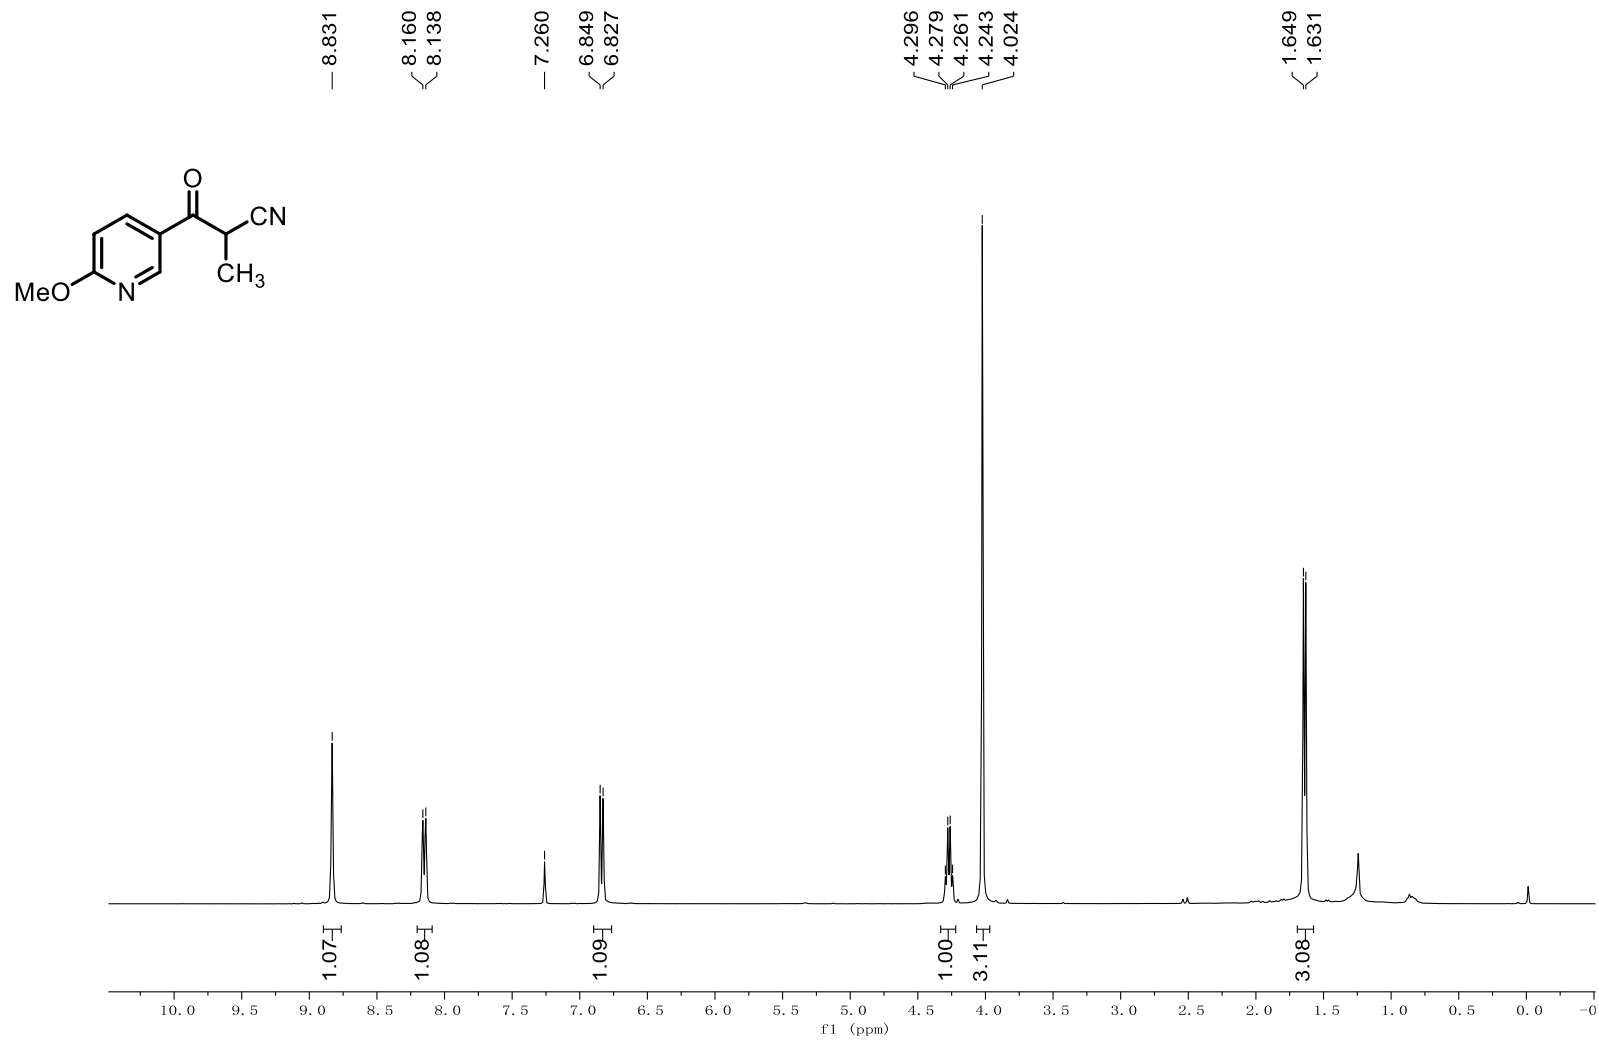

<sup>13</sup>C NMR (100 MHz, CDCl<sub>3</sub>) spectrum of 3-(6-Methoxypyridin-3-yl)-2-methyl-3-oxopropanenitrile (27)

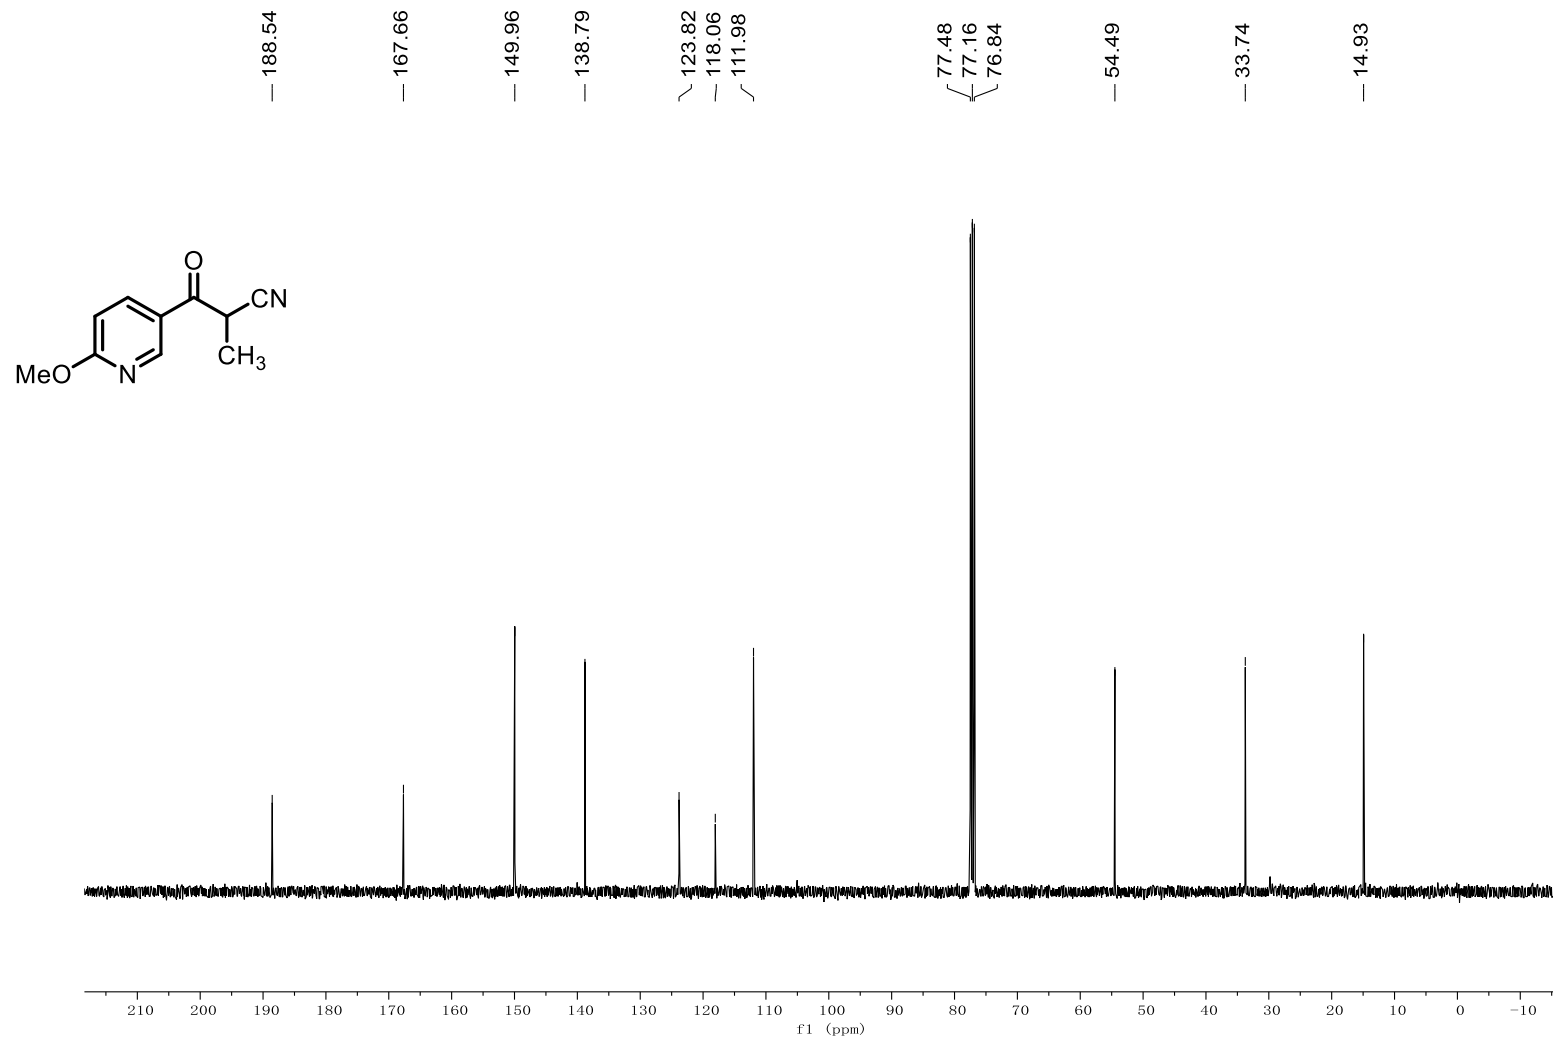

<sup>1</sup>H NMR (400 MHz, CDCl<sub>3</sub>) spectrum of (2*S*,3*S*,4*S*,5*S*,6*R*)-2-(Acetoxymethyl)-6-(4-(2-cyanopropanoyl)phenoxy)tetrahydro-2*H*-pyran-3,4,5-triyl triacetate (28)

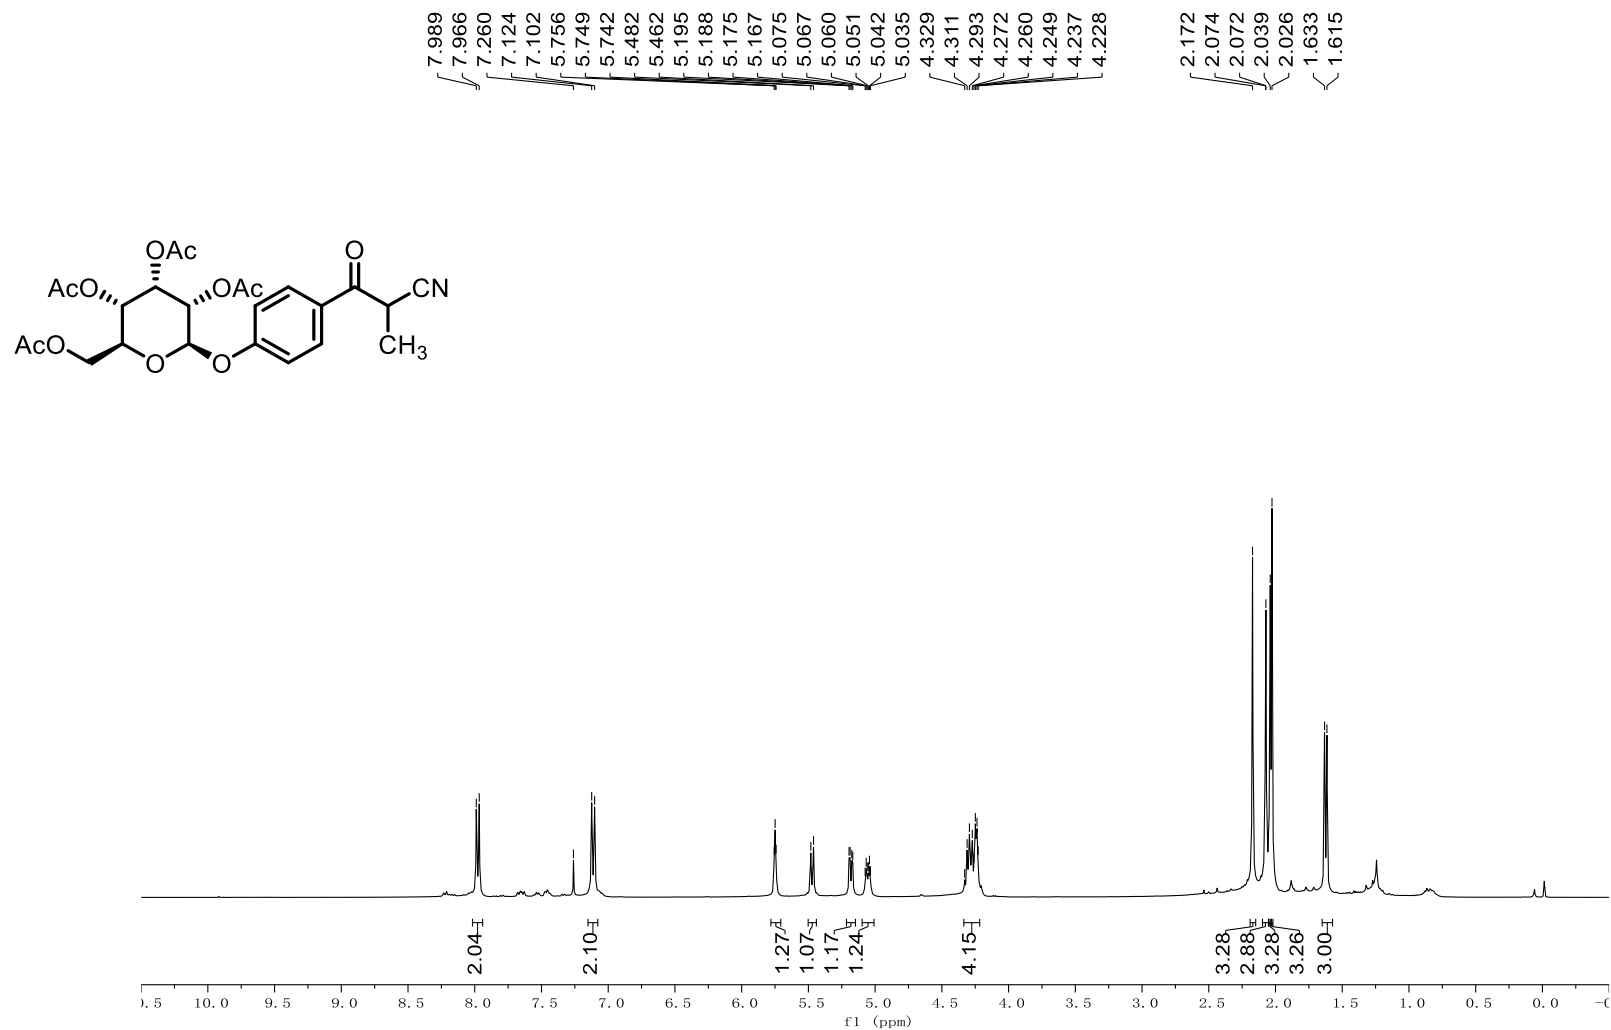

<sup>13</sup>C NMR (100 MHz, CDCl<sub>3</sub>) spectrum of (2*S*,3*S*,4*S*,5*S*,6*R*)-2-(Acetoxymethyl)-6-(4-(2-cyanopropanoyl)phenoxy)tetrahydro-2*H*-pyran-3,4,5-triyl triacetate (28)

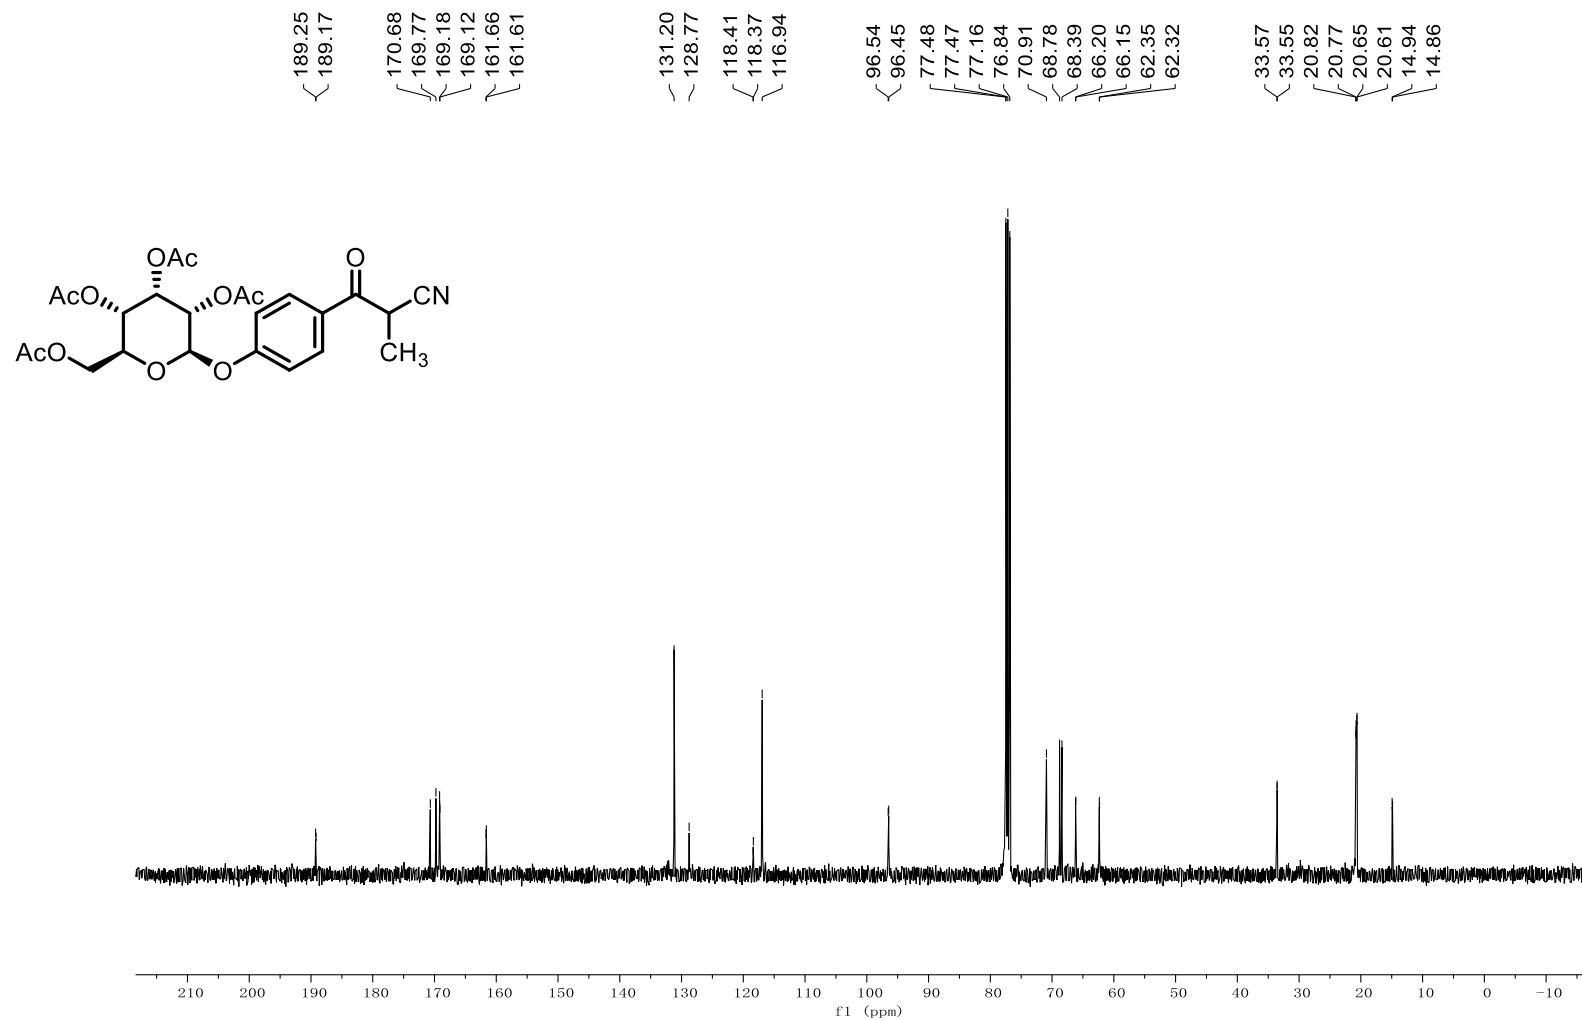

<sup>1</sup>H NMR (400 MHz, CDCl<sub>3</sub>) spectrum of 2-Methyl-3-oxo-5-phenylpentanenitrile (29)

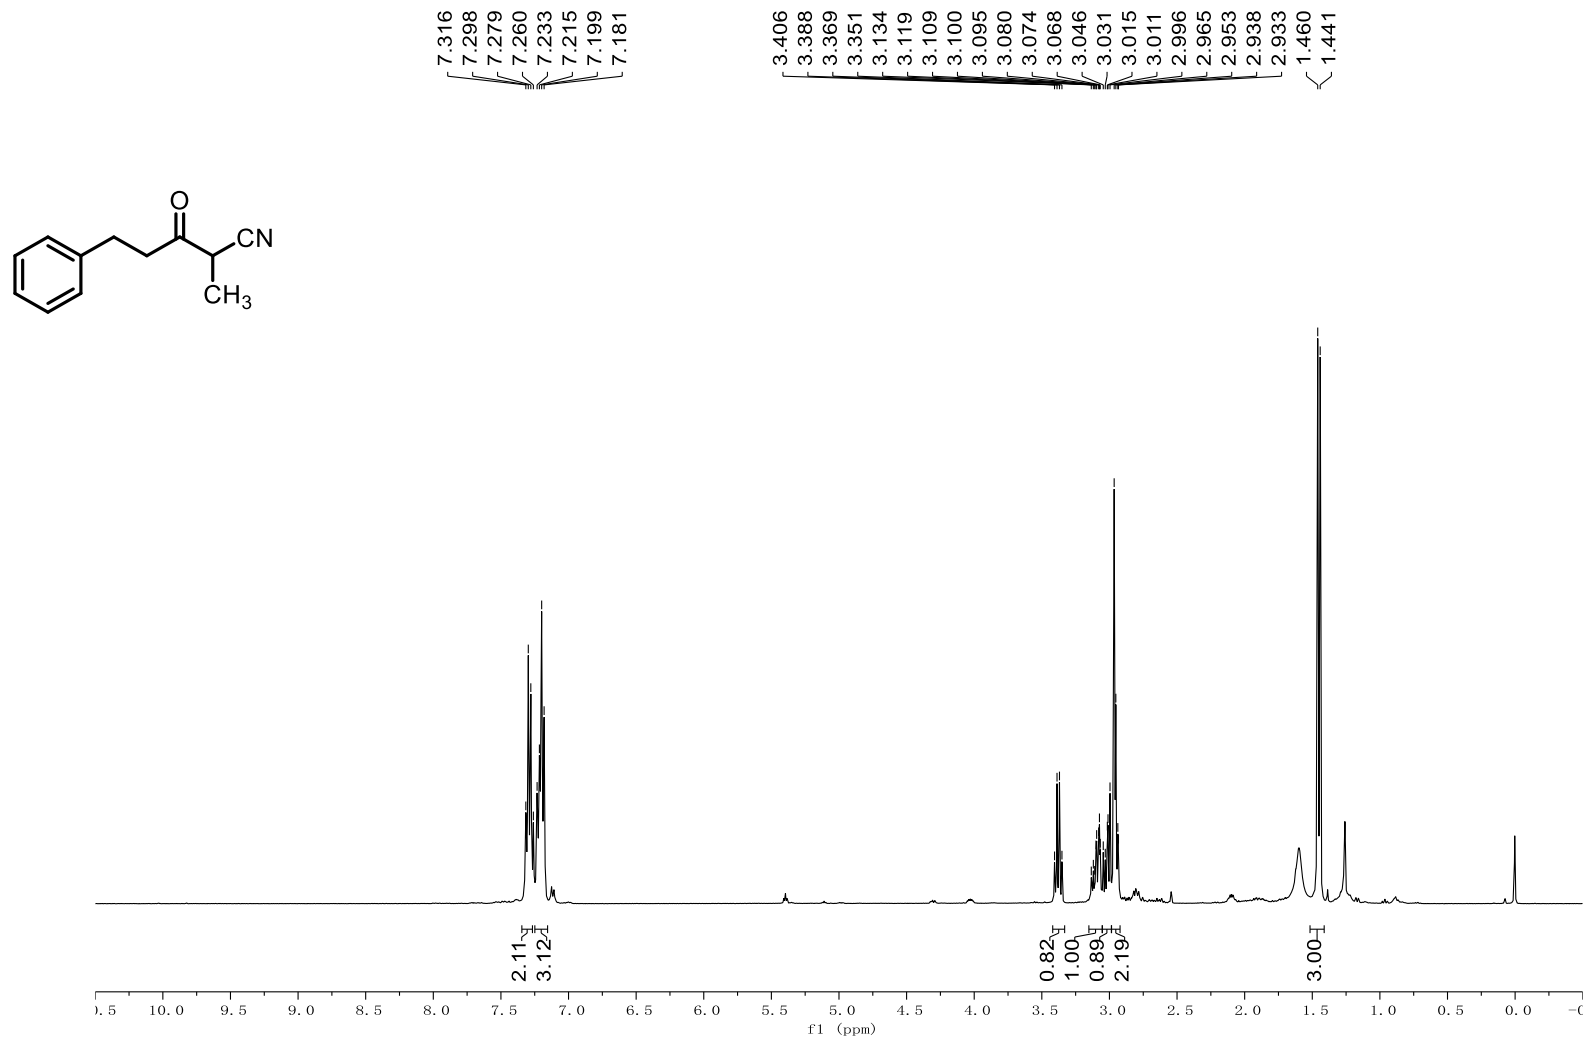

<sup>13</sup>C NMR (100 MHz, CDCl<sub>3</sub>) spectrum of 2-Methyl-3-oxo-5-phenylpentanenitrile (29)

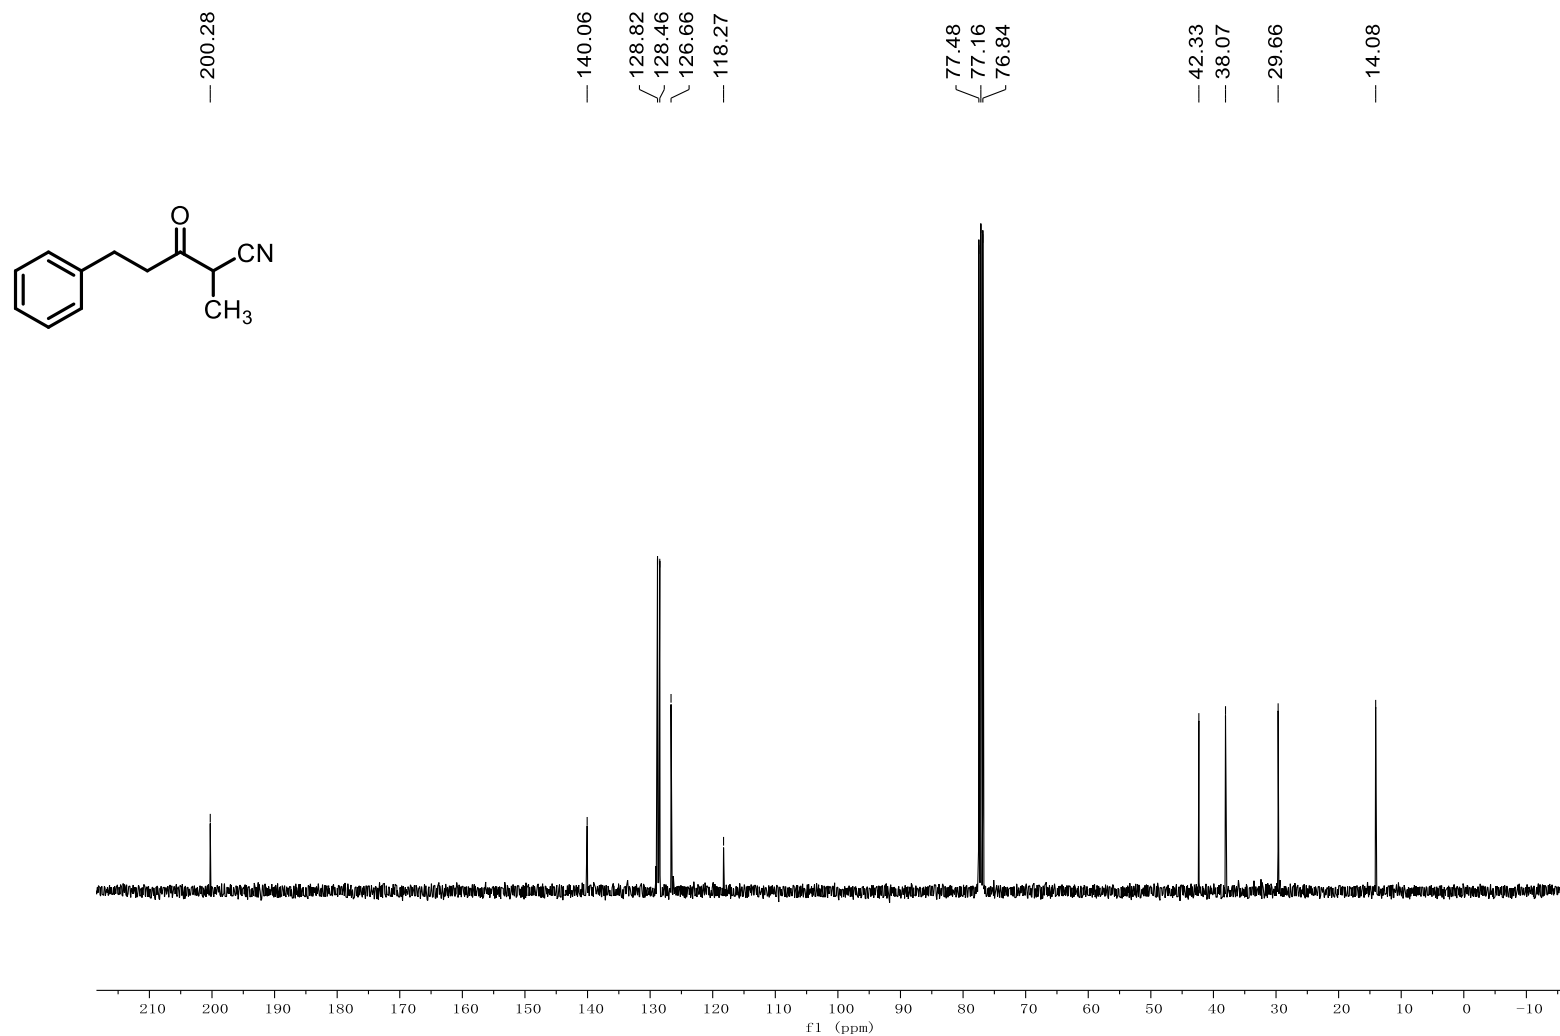

<sup>1</sup>H NMR (400 MHz, CDCl<sub>3</sub>) spectrum of 2-Methyl-3-oxododecanenitrile (30)

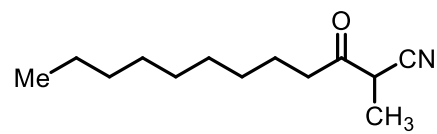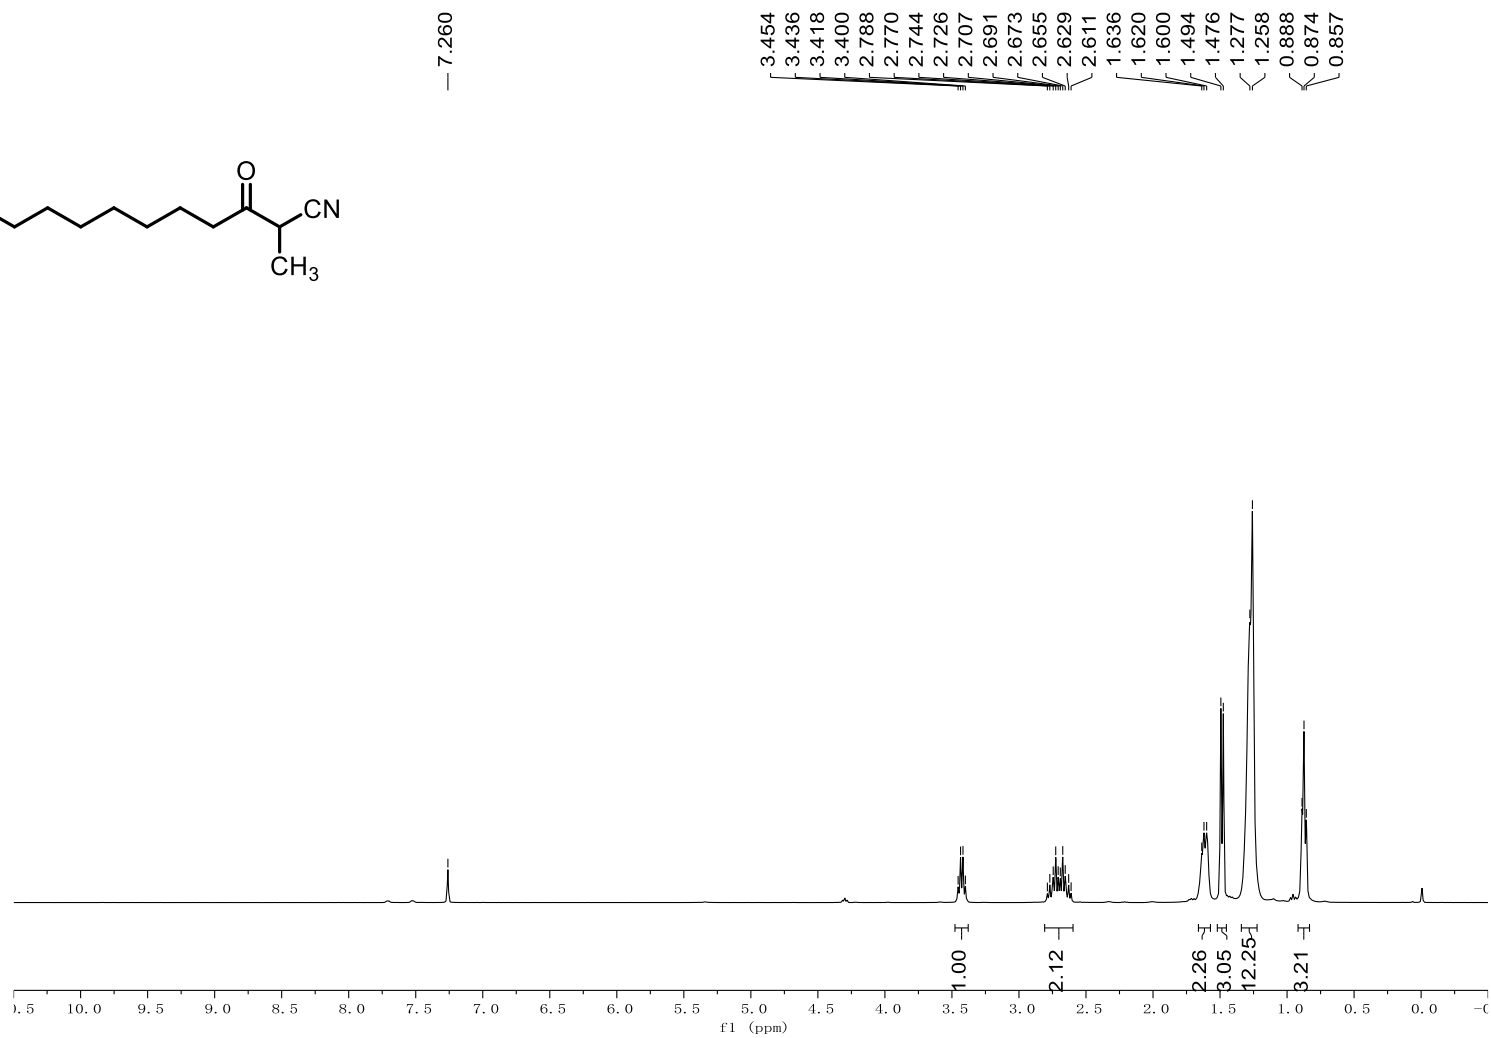

<sup>13</sup>C NMR (100 MHz, CDCl<sub>3</sub>) spectrum of 2-Methyl-3-oxododecanenitrile (30)

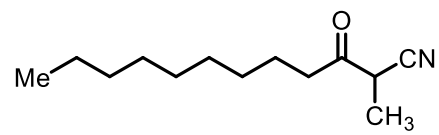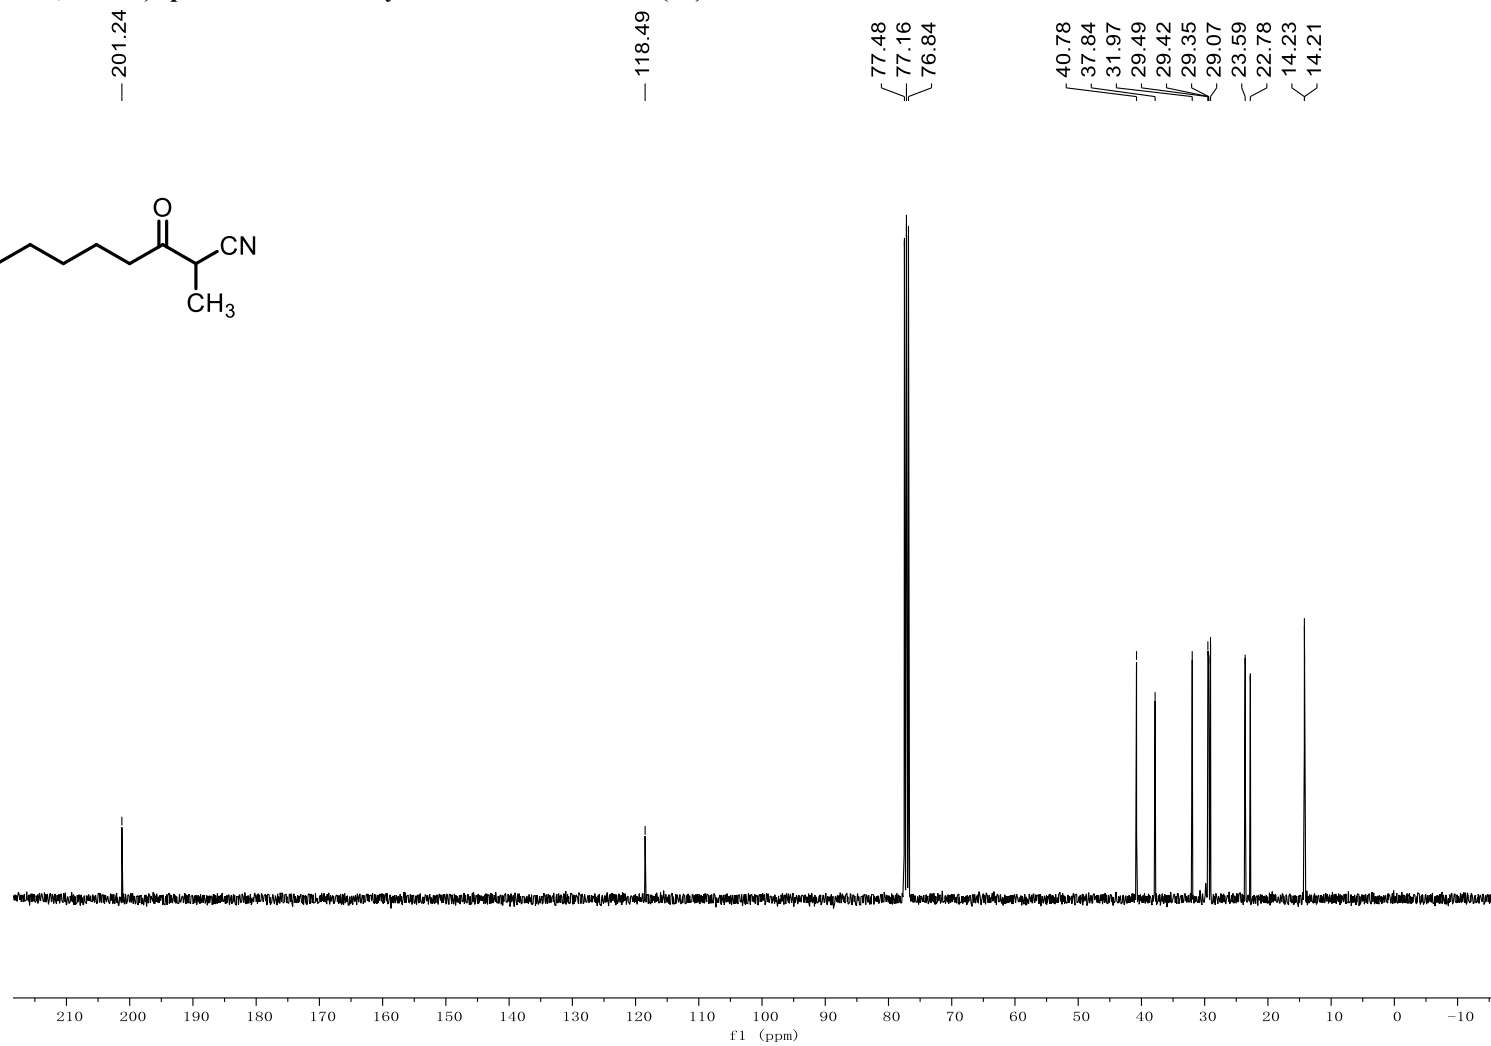

<sup>1</sup>H NMR (400 MHz, CDCl<sub>3</sub>) spectrum of (*E*)-2-Methyl-3-oxododec-8-enenitrile (31) with minor (*Z*)-31

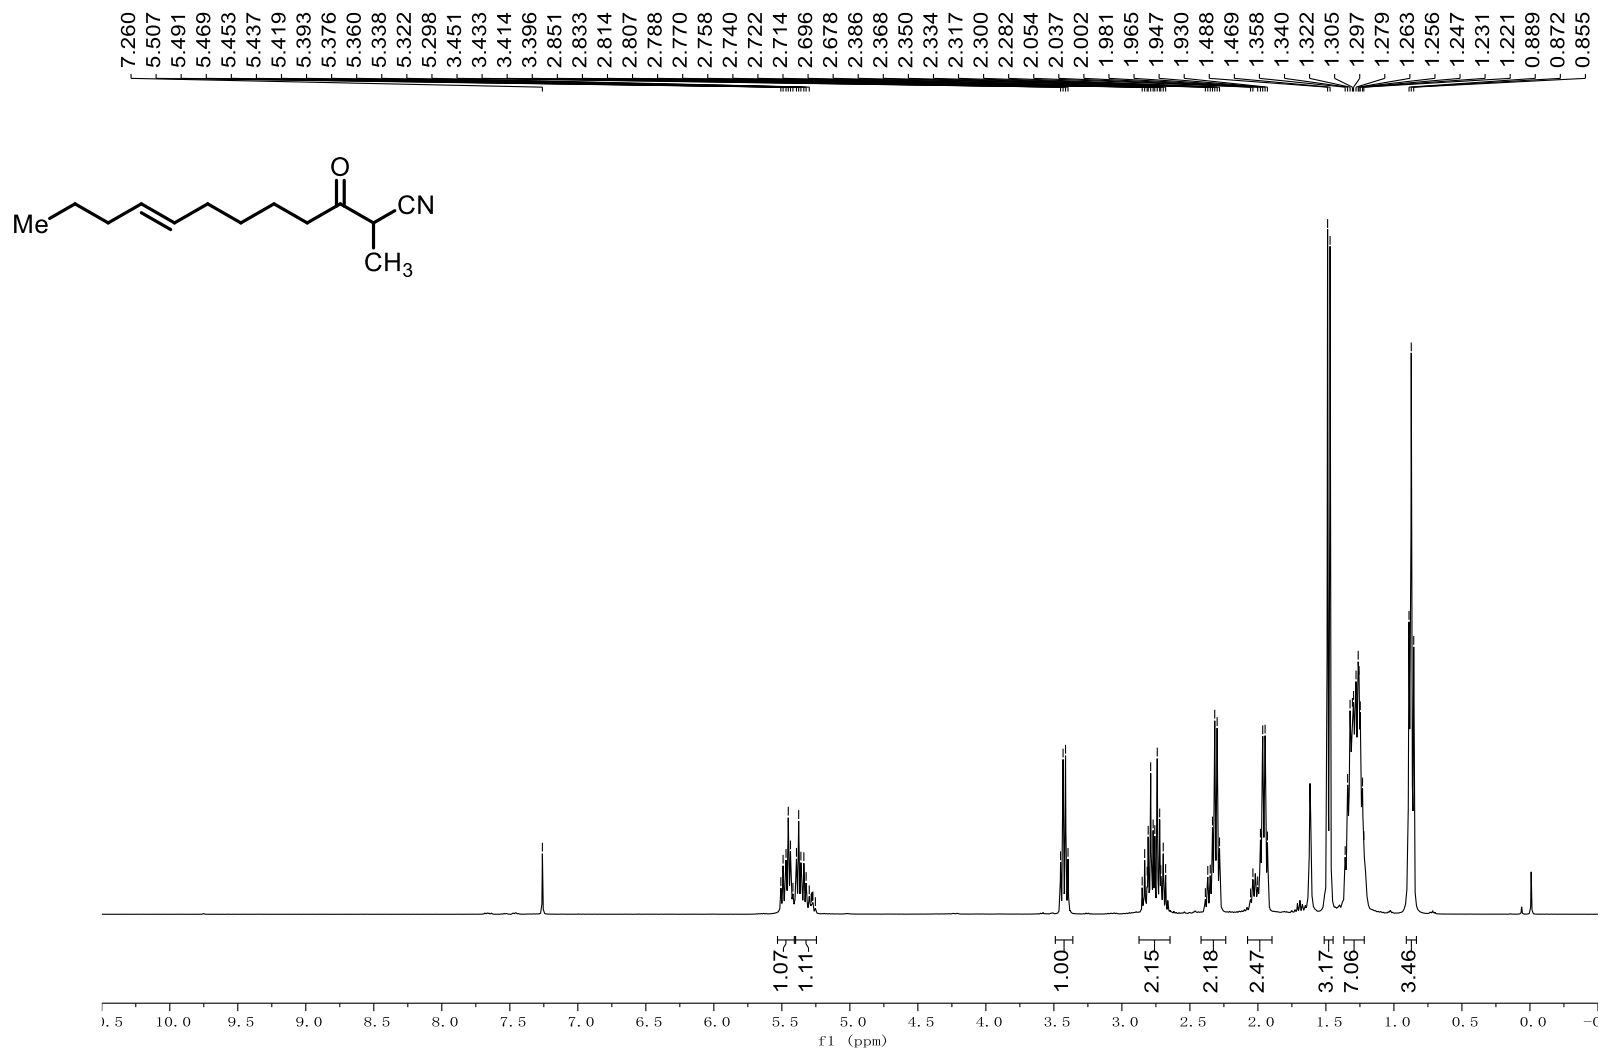

<sup>13</sup>C NMR (100 MHz, CDCl<sub>3</sub>) spectrum of (*E*)-2-Methyl-3-oxododec-8-enenitrile (31) with minor (*Z*)-31

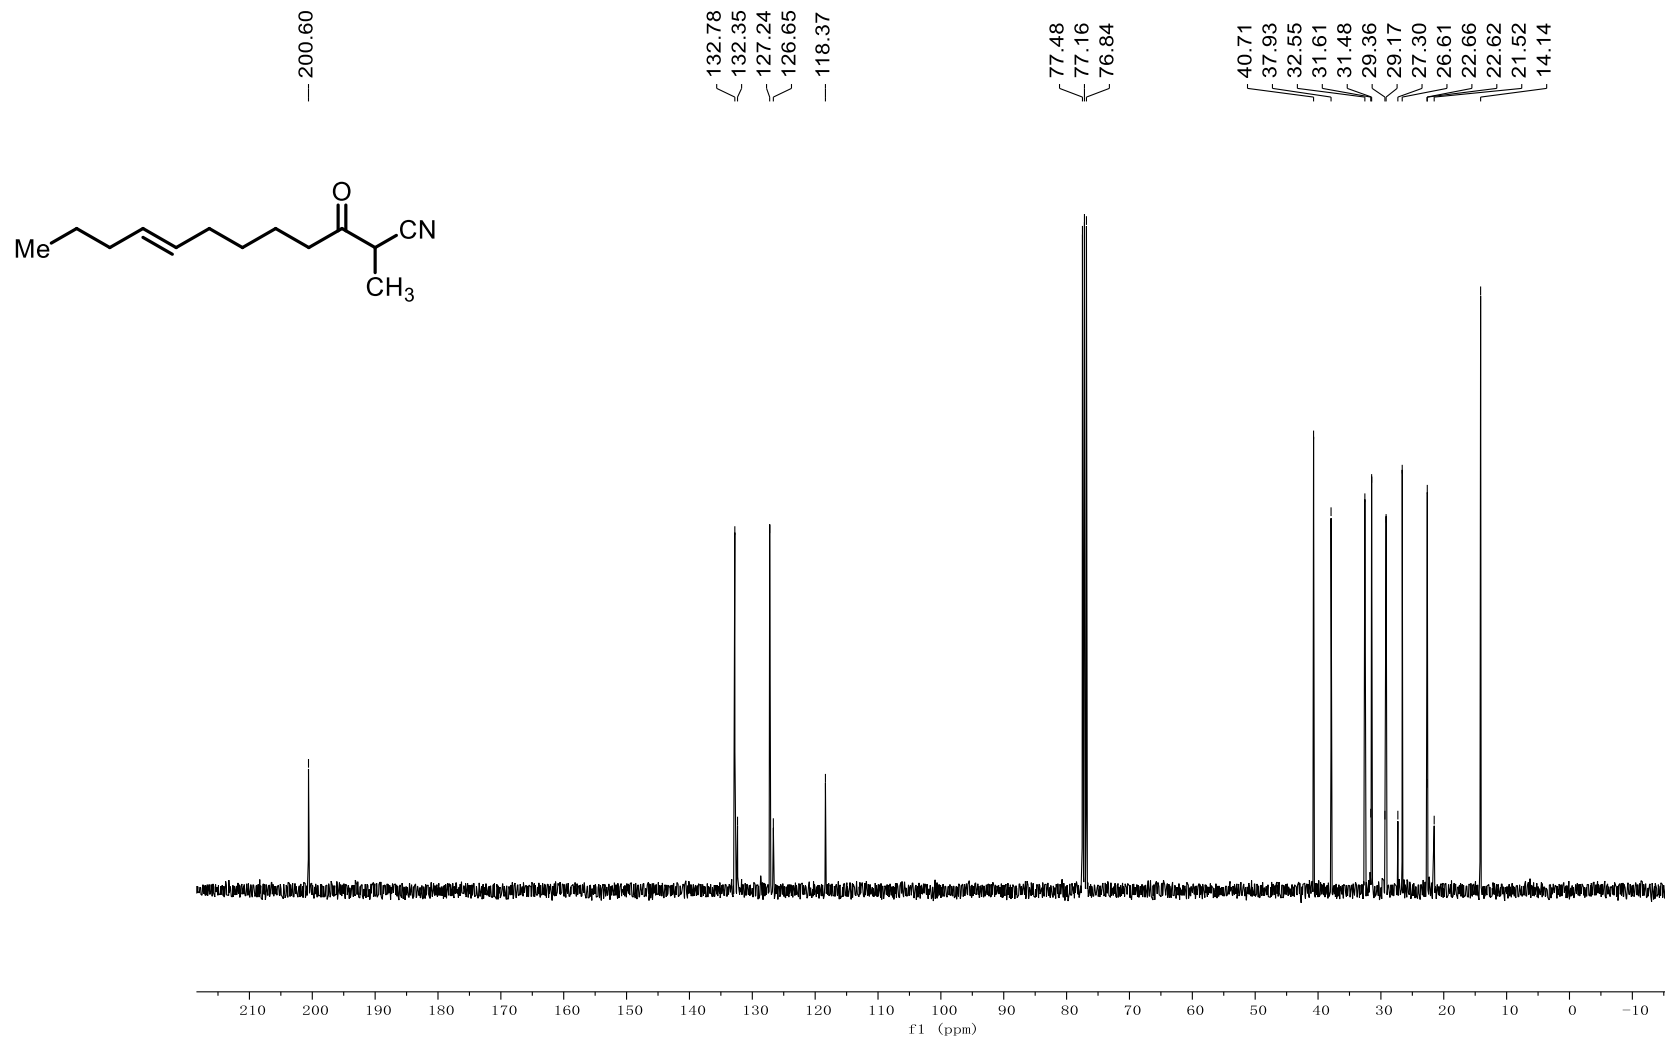

<sup>1</sup>H NMR (400 MHz, CDCl<sub>3</sub>) spectrum of 3-Cyclohexyl-2-methyl-3-oxopropanenitrile (32)

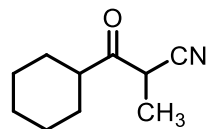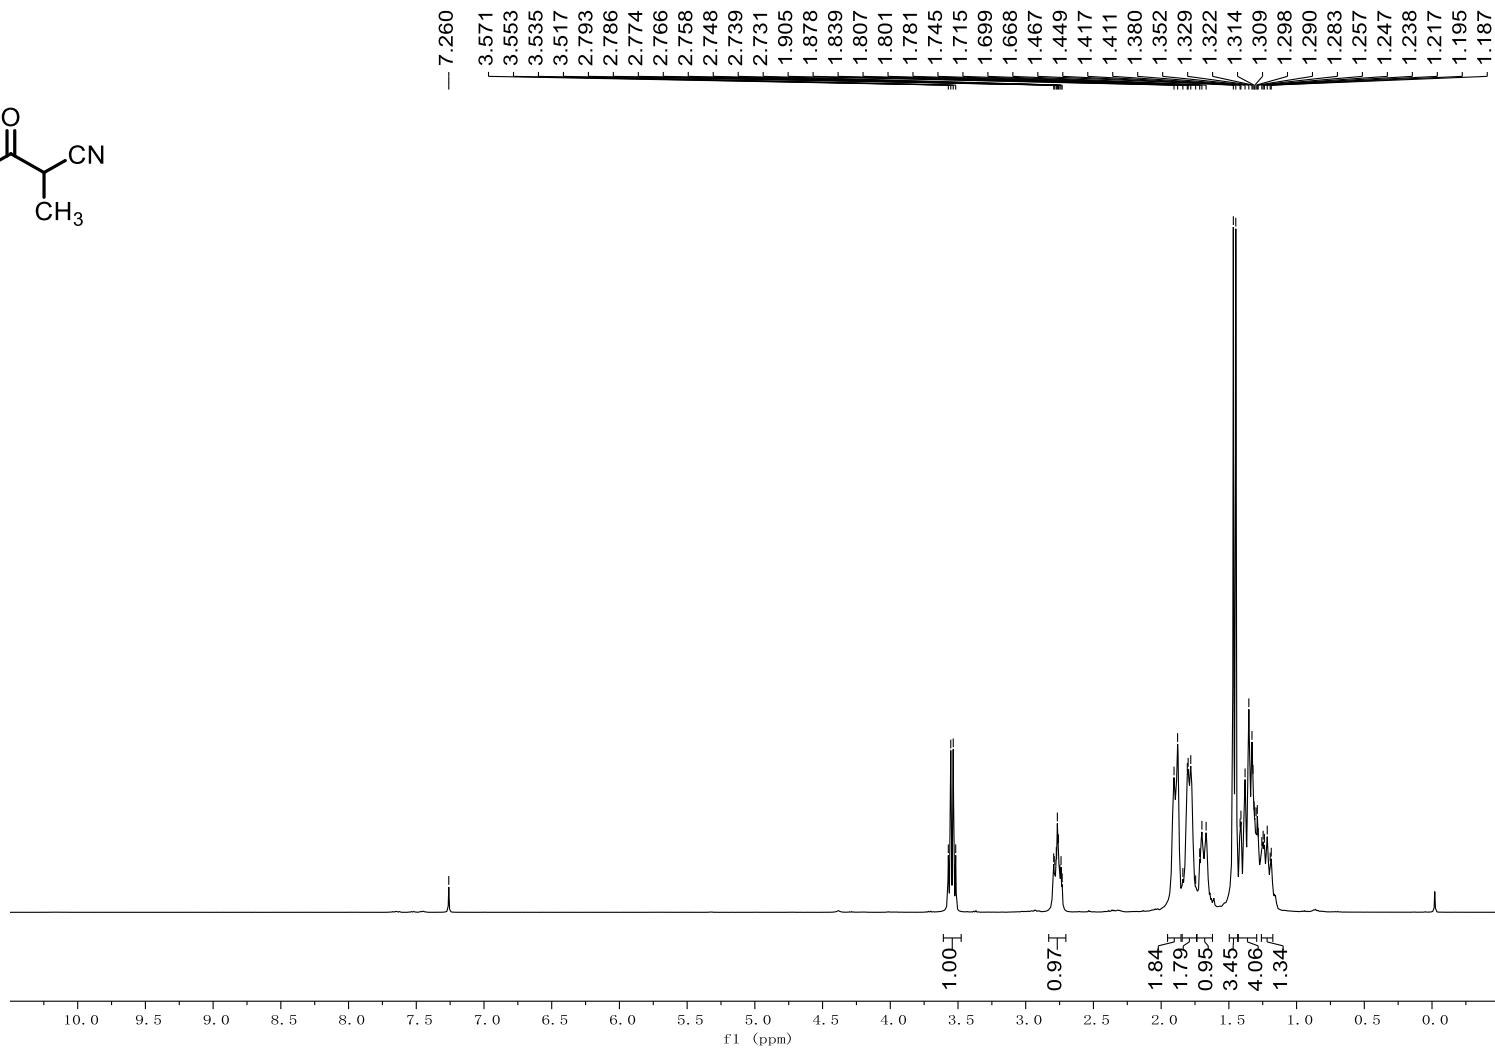

<sup>13</sup>C NMR (100 MHz, CDCl<sub>3</sub>) spectrum of 3-Cyclohexyl-2-methyl-3-oxopropanenitrile (32)

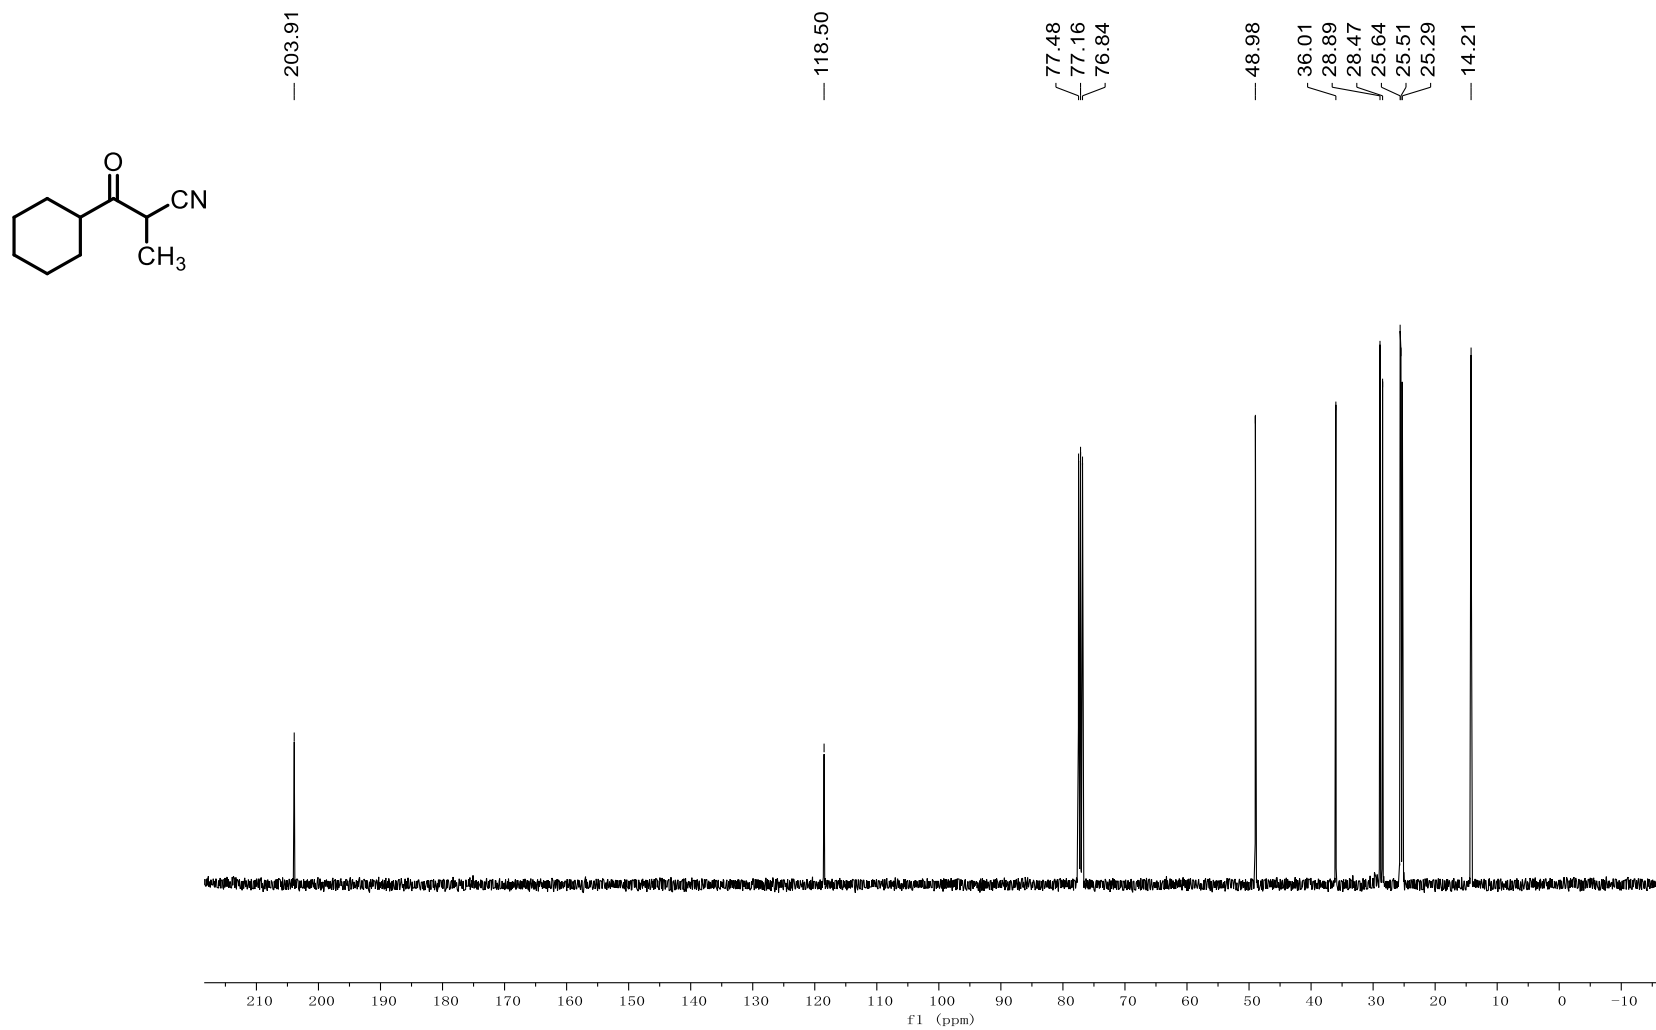

<sup>1</sup>H NMR (400 MHz, CDCl<sub>3</sub>) spectrum of 5-(Benzo[d][1,3]dioxol-5-yl)-2,4-dimethyl-3-oxopentanenitrile (33)

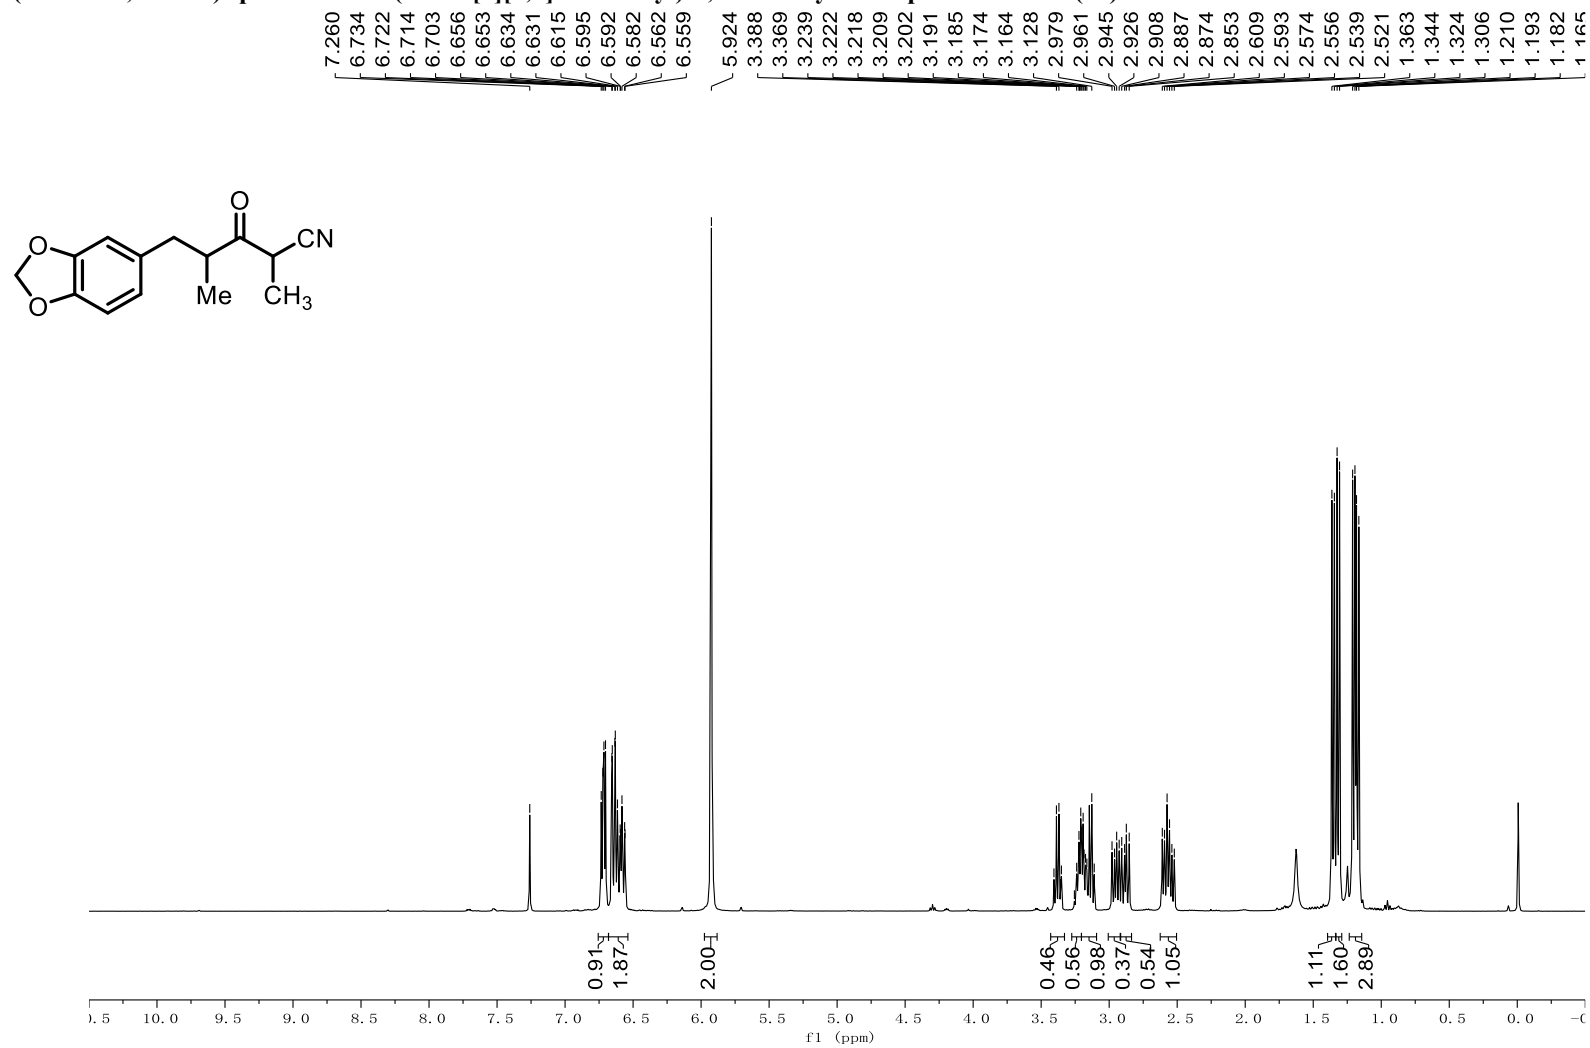

**$^{13}\text{C}$  NMR (100 MHz,  $\text{CDCl}_3$ ) spectrum of 5-(Benzo[d][1,3]dioxol-5-yl)-2,4-dimethyl-3-oxopentanenitrile (33)**

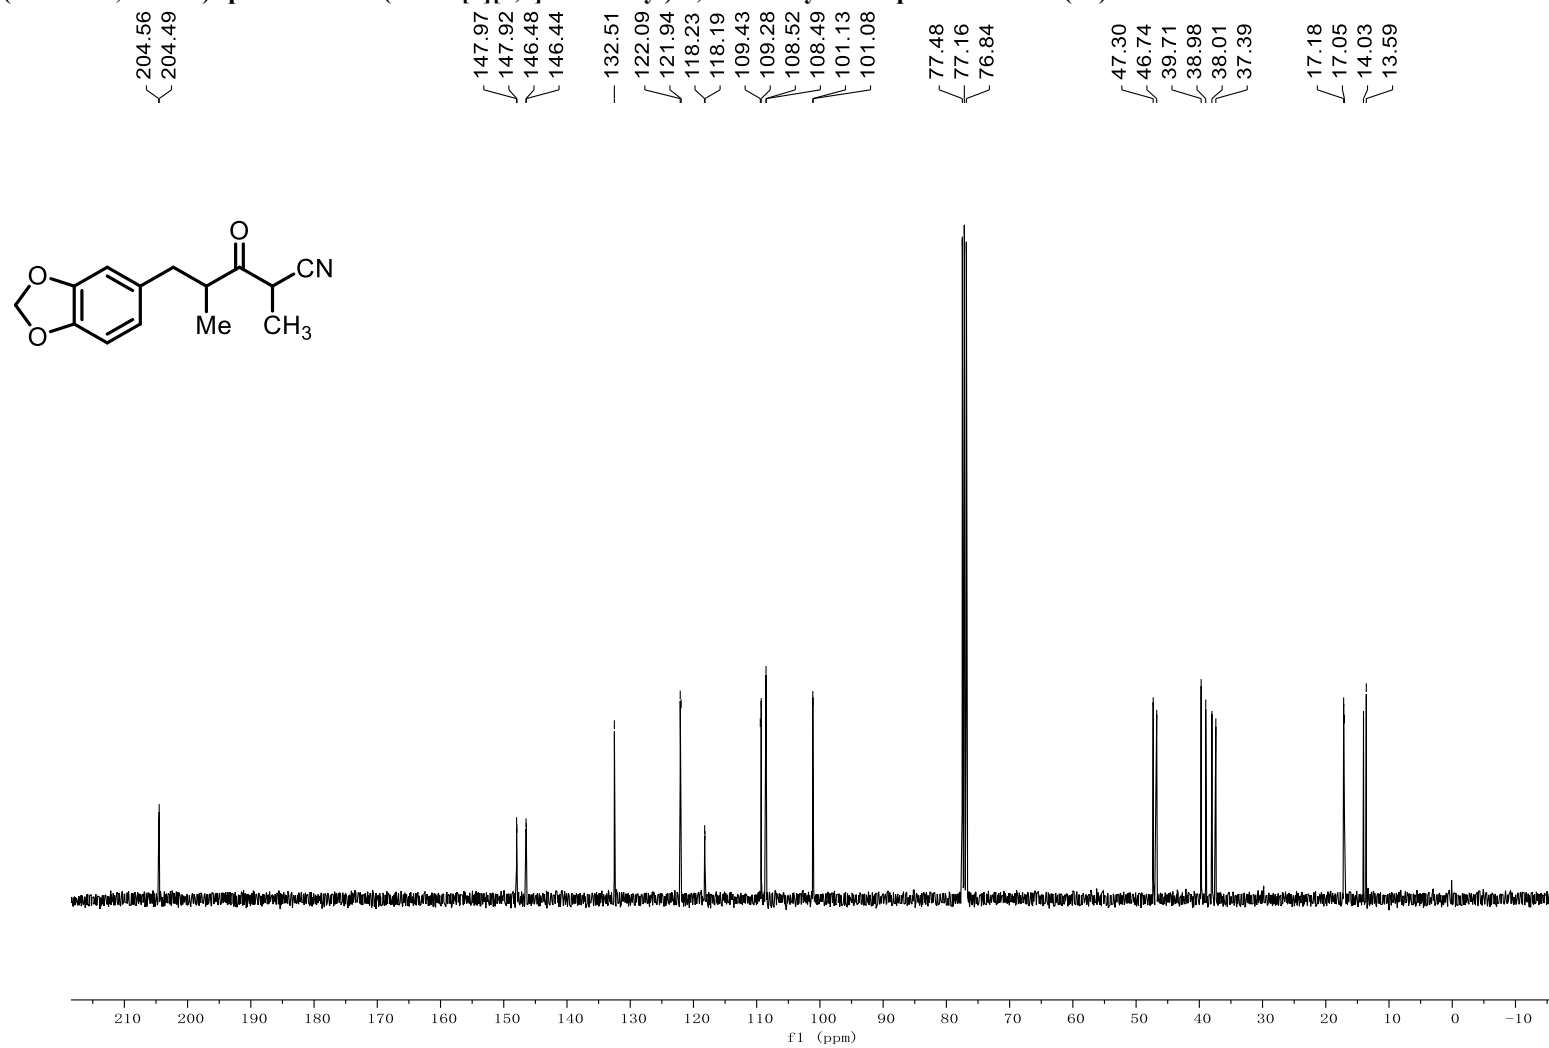

**<sup>1</sup>H NMR (400 MHz, CDCl<sub>3</sub>) spectrum of 2-Benzoylbutanenitrile (34)**

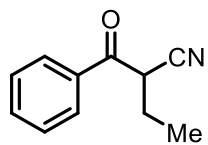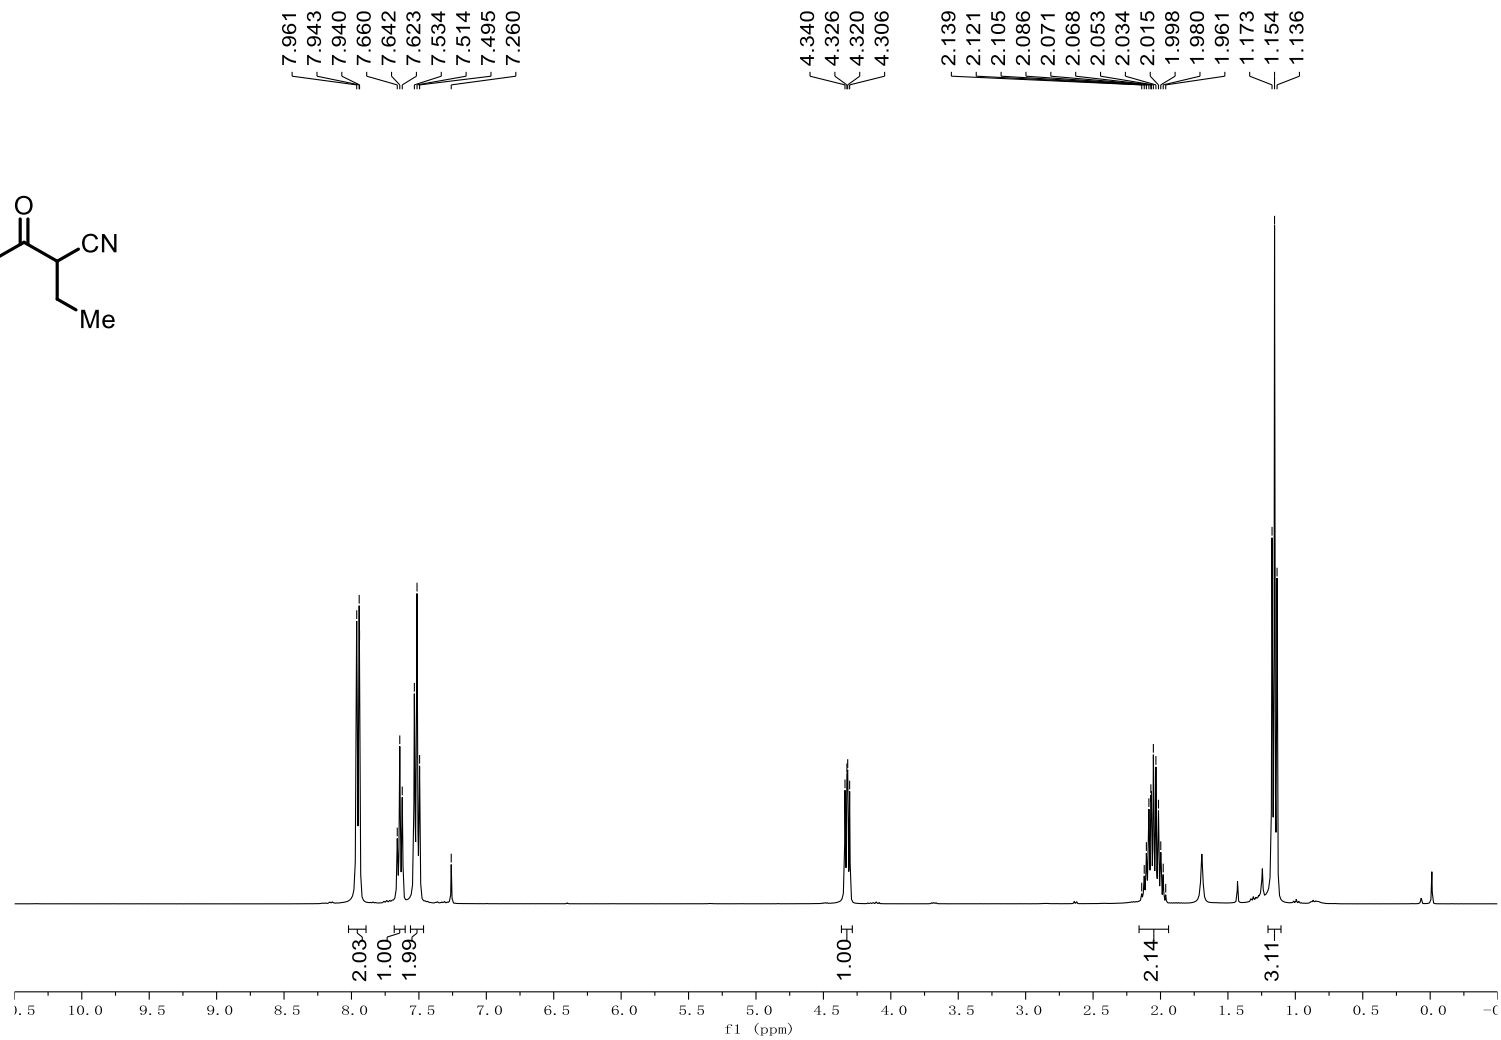

<sup>13</sup>C NMR (100 MHz, CDCl<sub>3</sub>) spectrum of 2-Benzoylbutanenitrile (34)

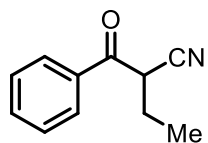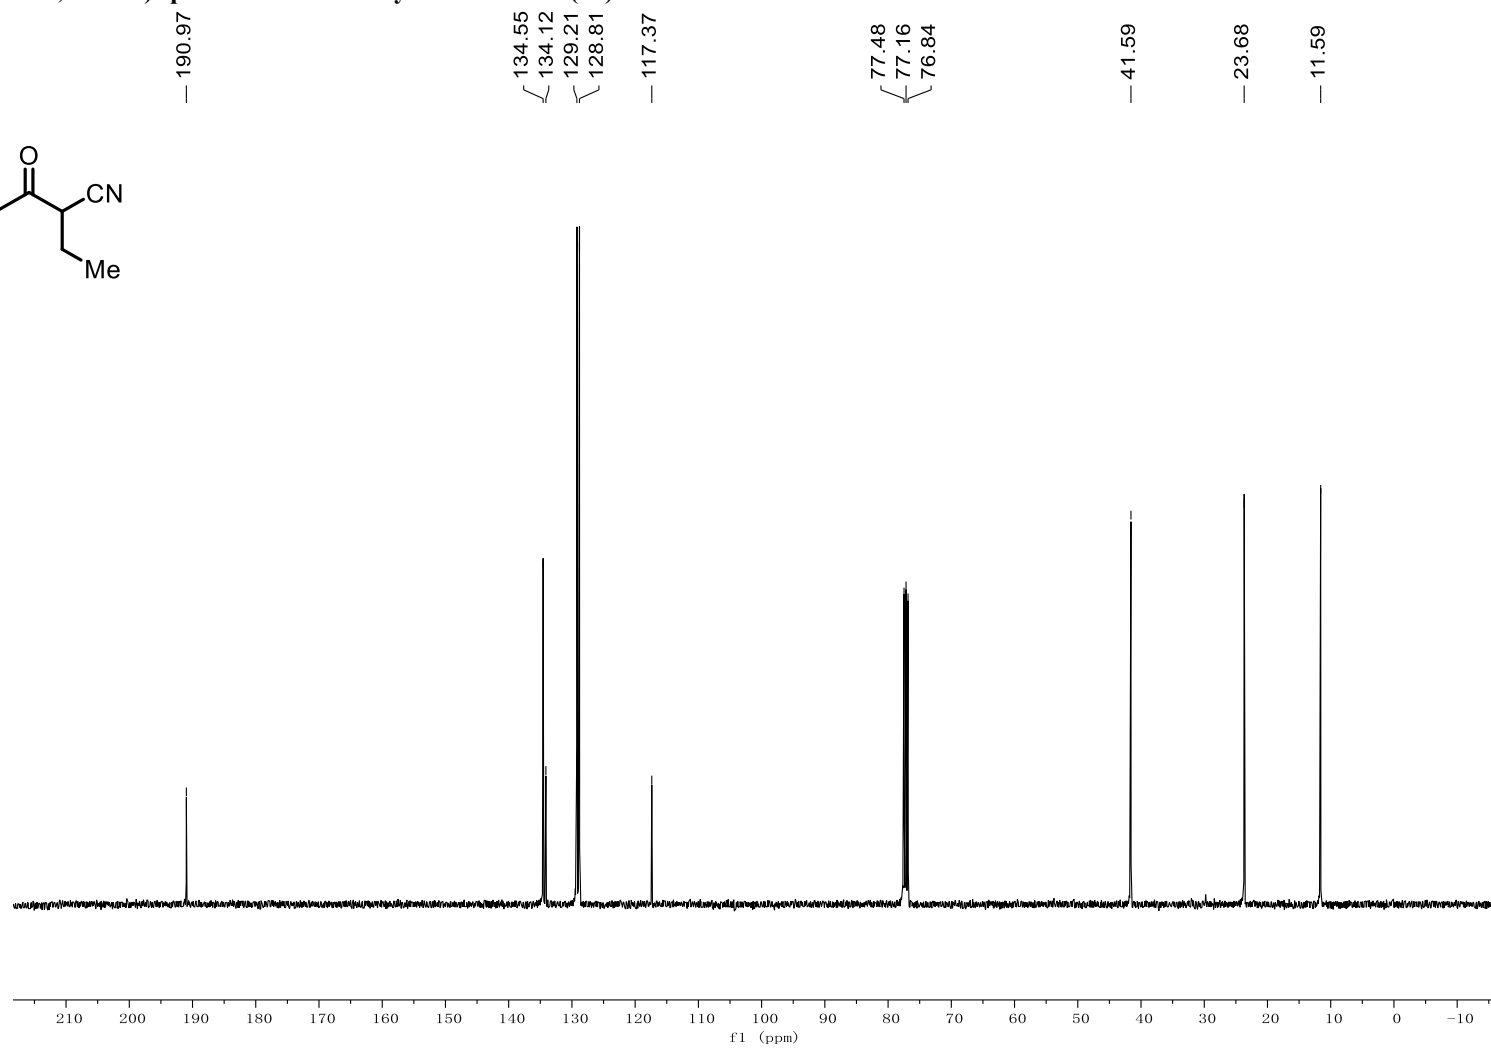

<sup>1</sup>H NMR (400 MHz, CDCl<sub>3</sub>) spectrum of 2-Benzoylpentanenitrile (35)

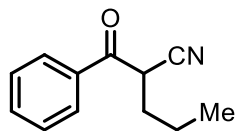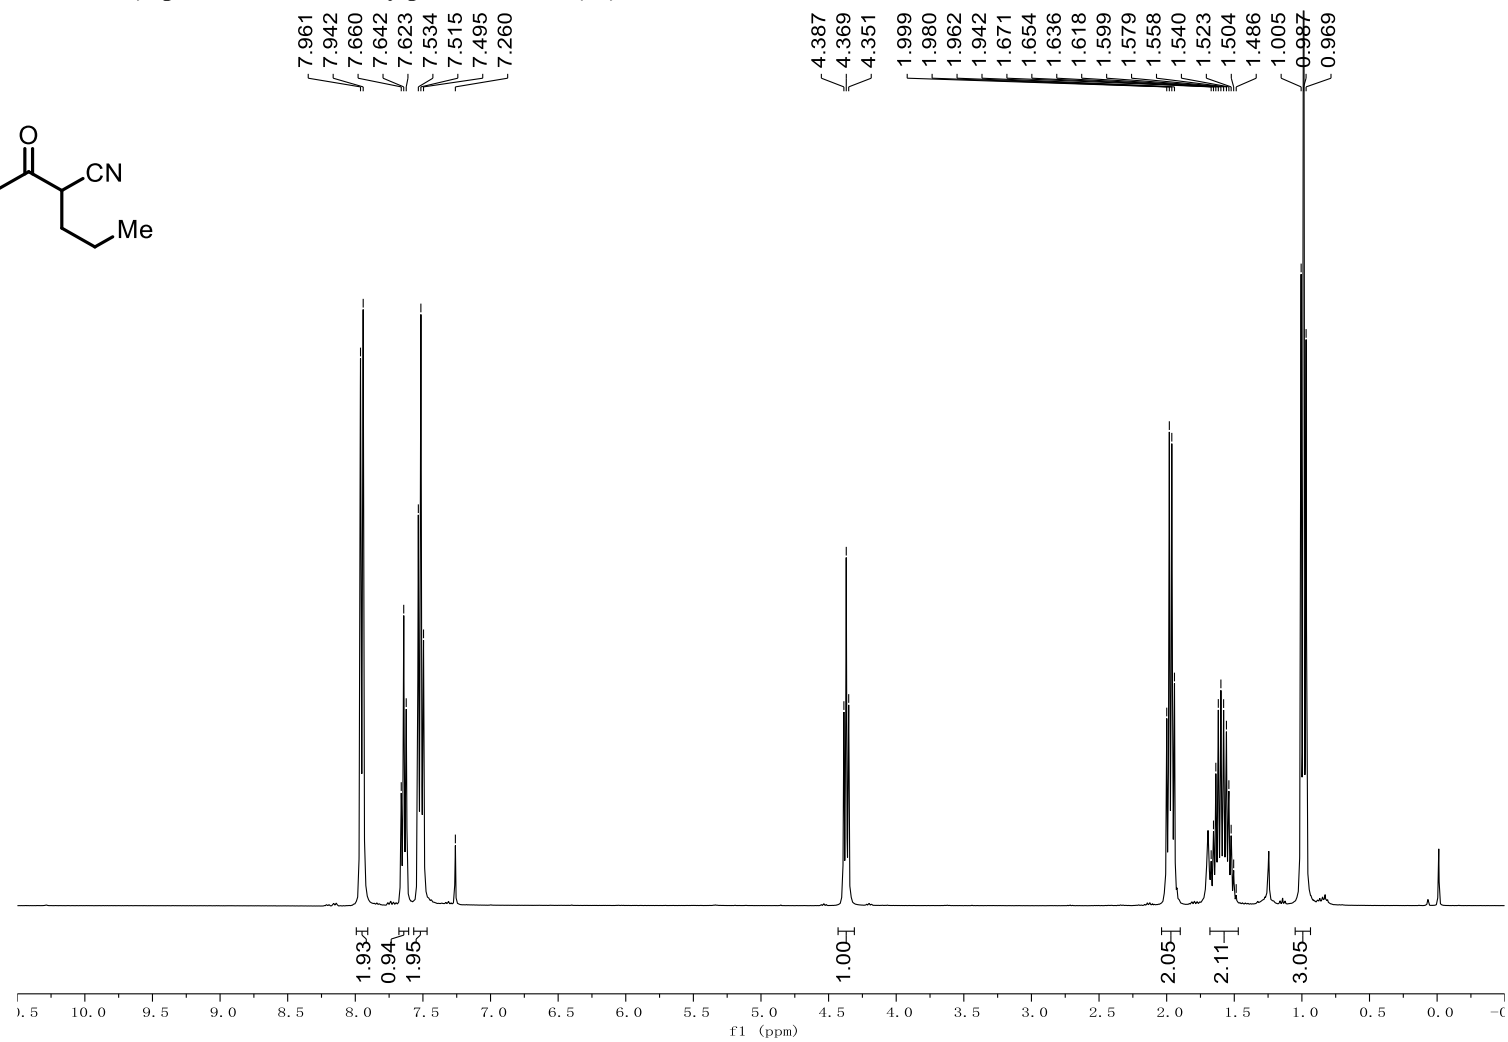

**<sup>13</sup>C NMR (100 MHz, CDCl<sub>3</sub>) spectrum of 2-Benzoylpentanenitrile (35)**

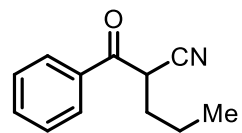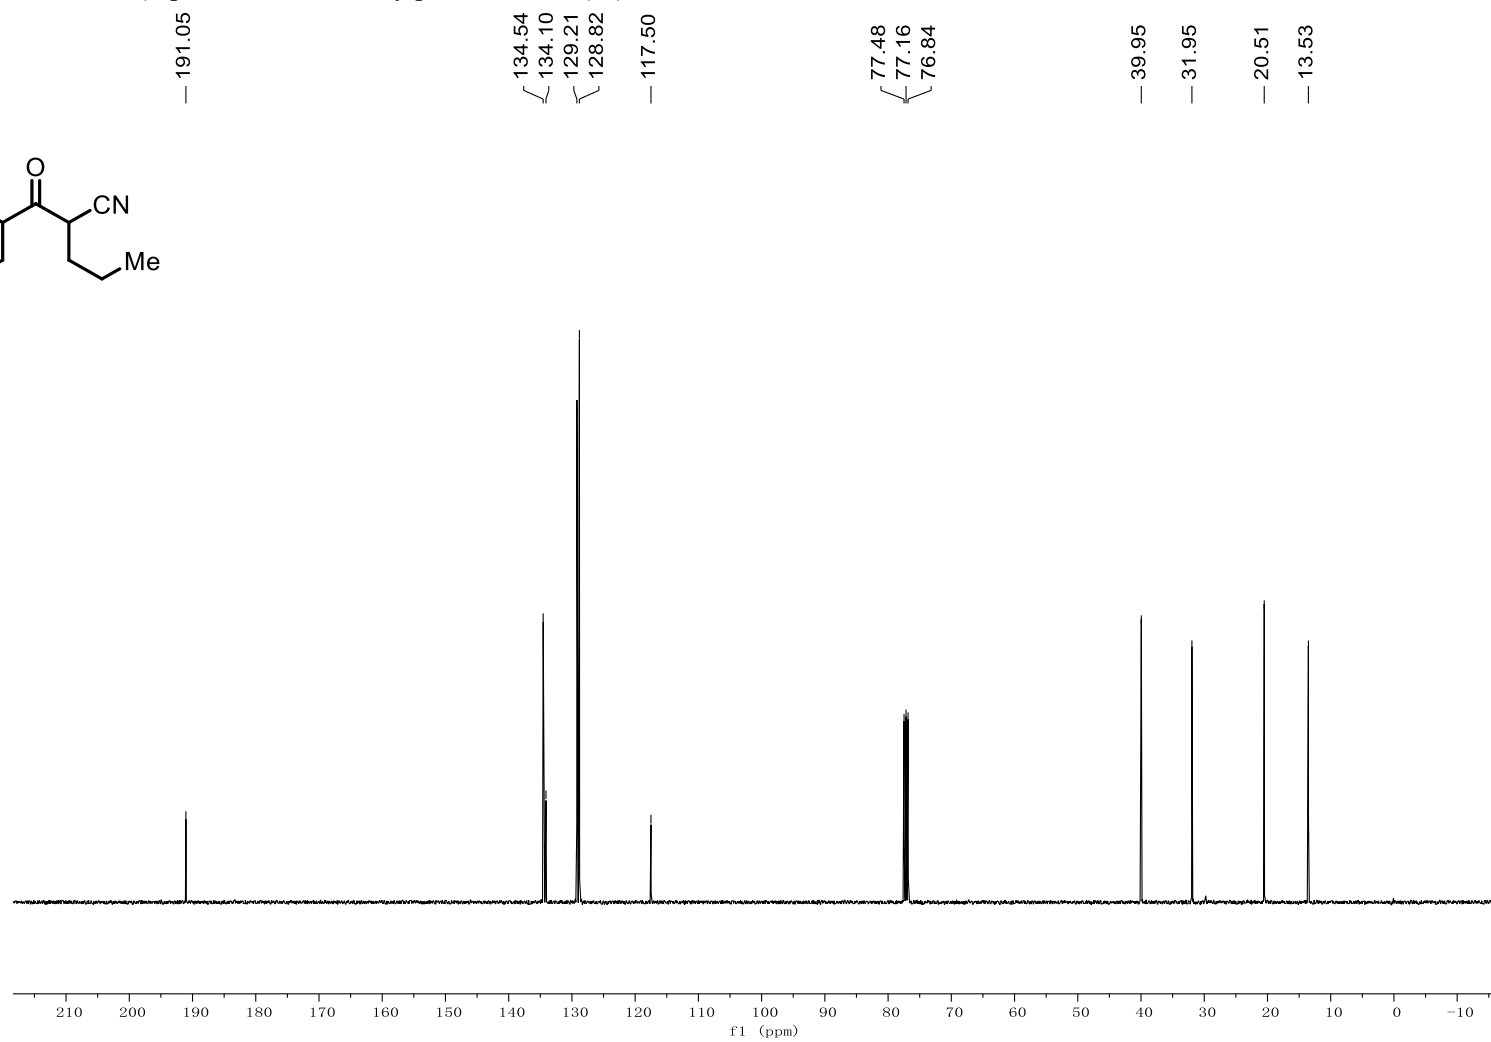

<sup>1</sup>H NMR (400 MHz, CDCl<sub>3</sub>) spectrum of 2-(Cyclopentylmethyl)-3-oxo-3-phenylpropanenitrile (36)

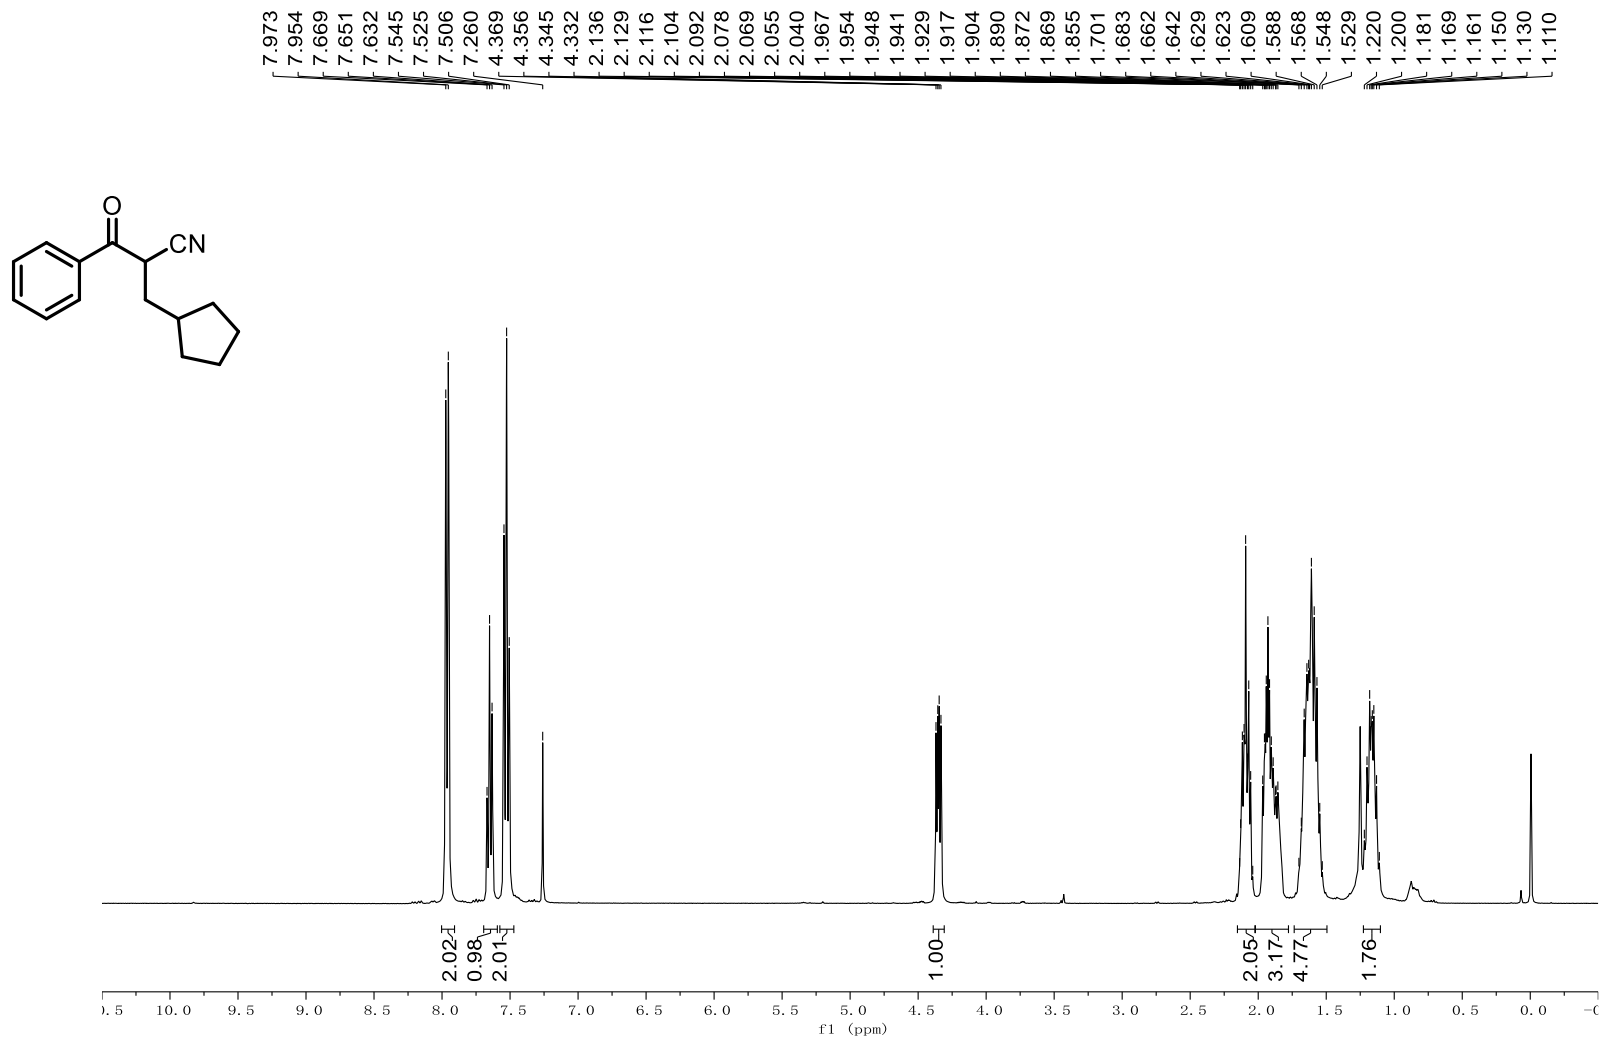

<sup>13</sup>C NMR (100 MHz, CDCl<sub>3</sub>) spectrum of 2-(Cyclopentylmethyl)-3-oxo-3-phenylpropanenitrile (36)

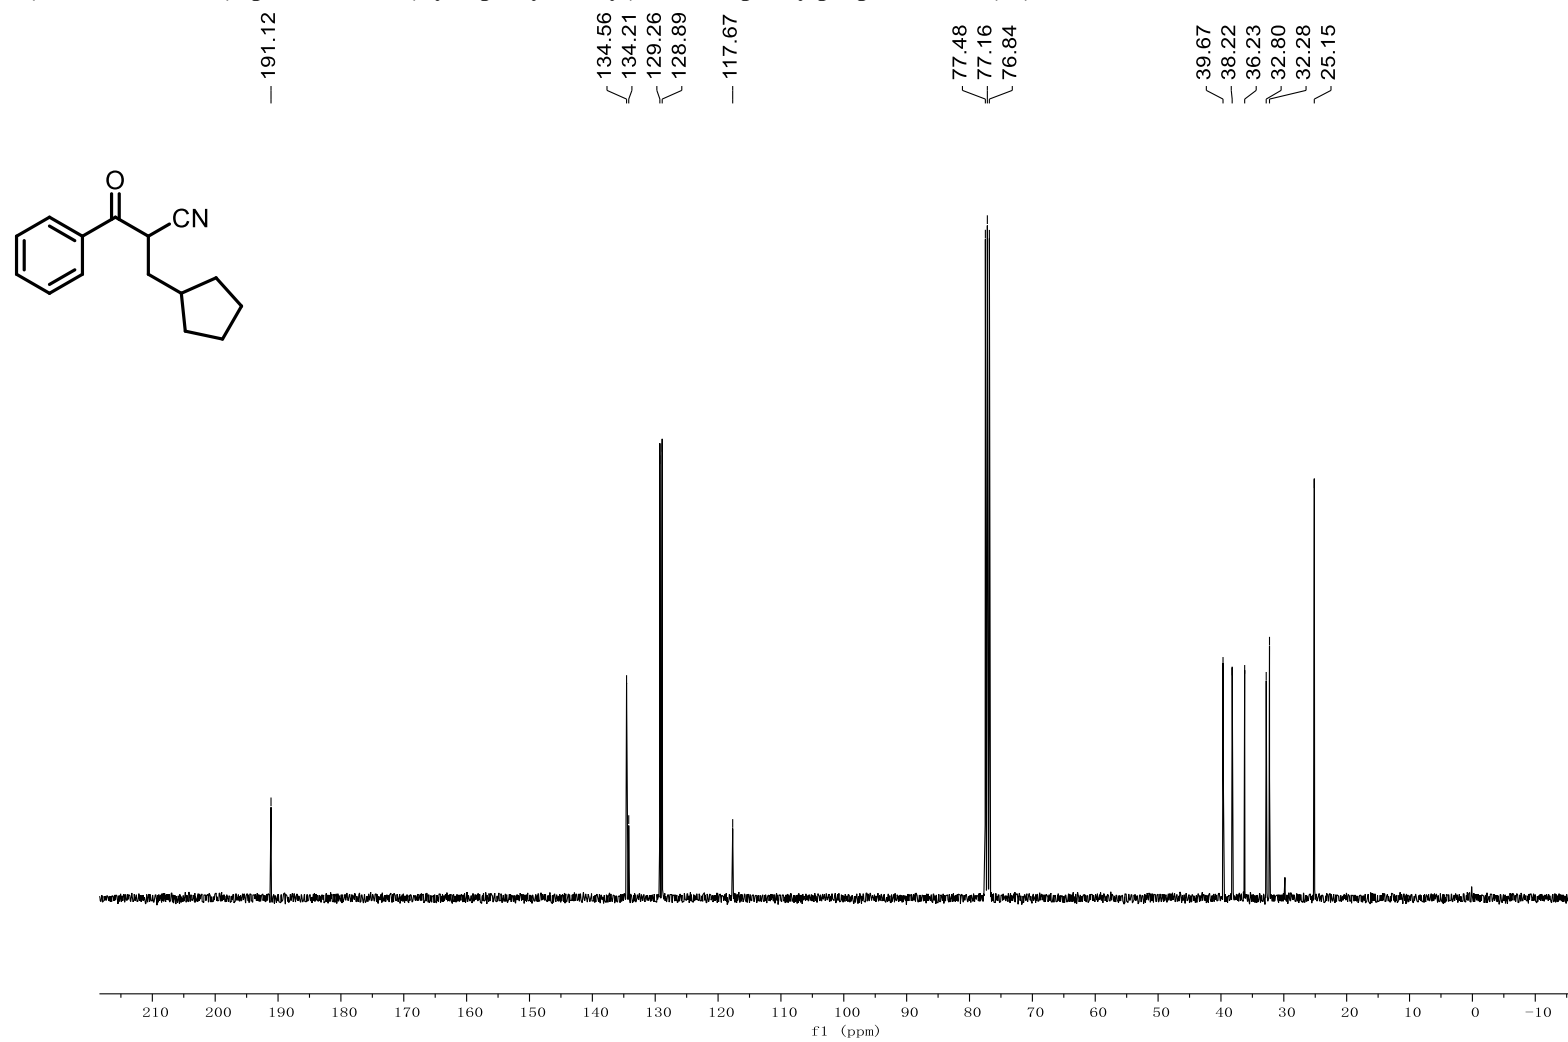

<sup>1</sup>H NMR (400 MHz, CDCl<sub>3</sub>) spectrum of 2-Benzyl-3-oxo-3-phenylpropanenitrile (37)

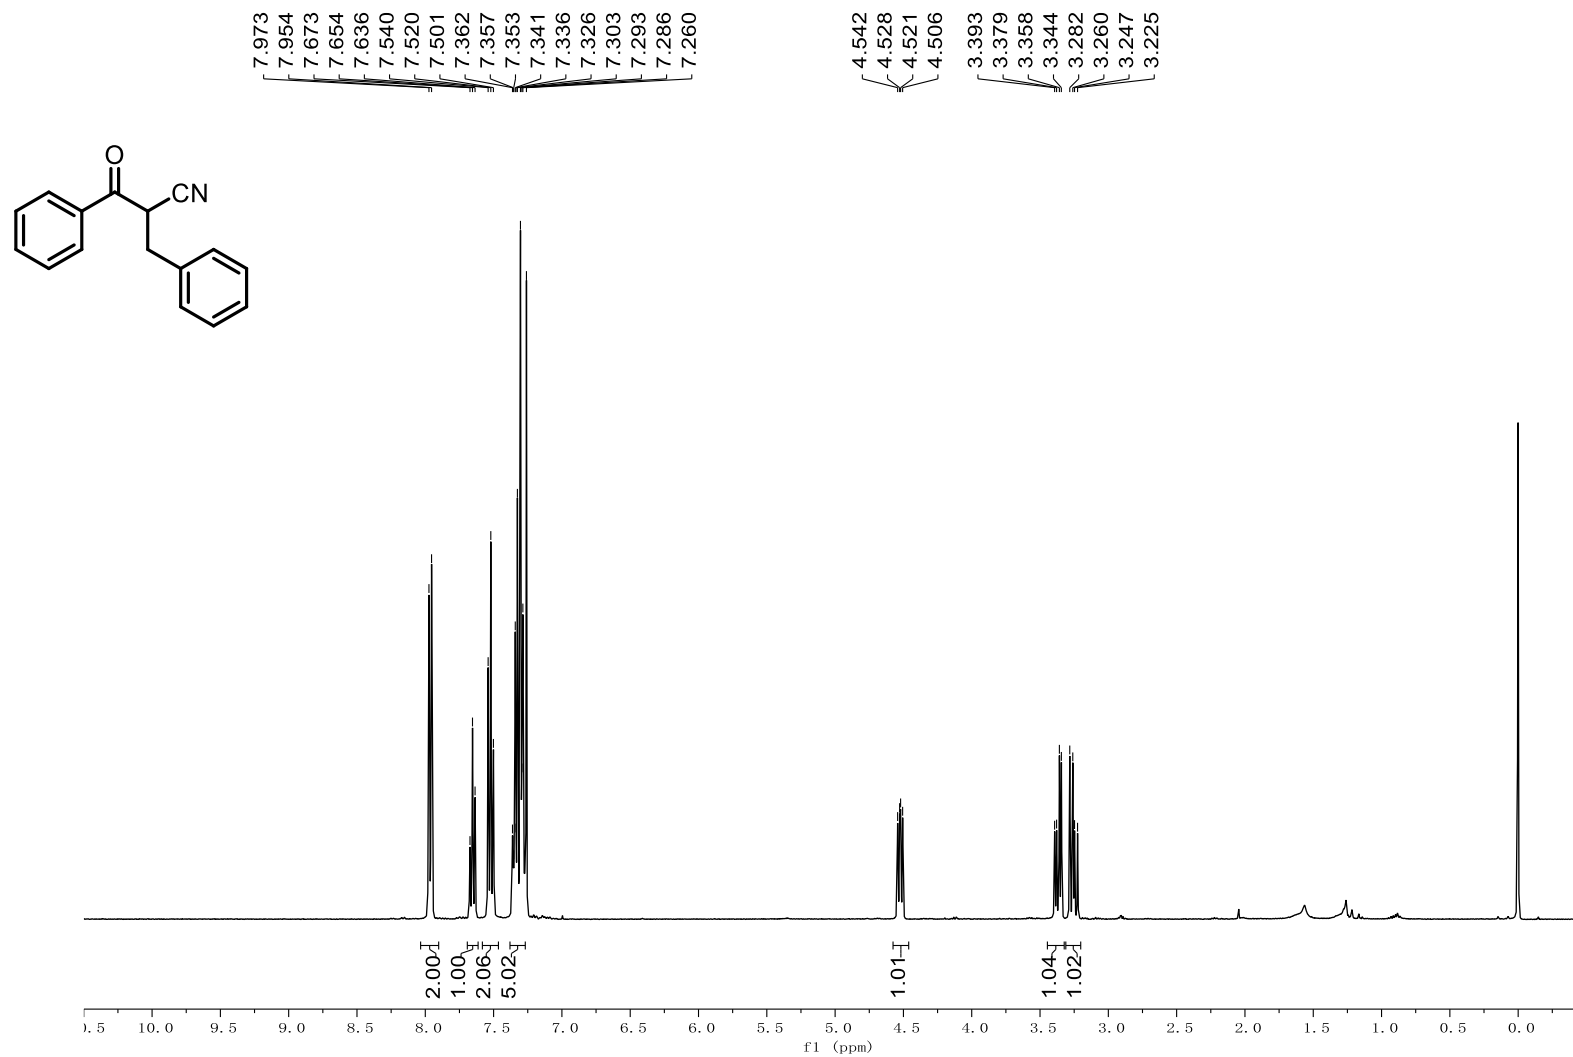

<sup>13</sup>C NMR (100 MHz, CDCl<sub>3</sub>) spectrum of 2-Benzyl-3-oxo-3-phenylpropanenitrile (37)

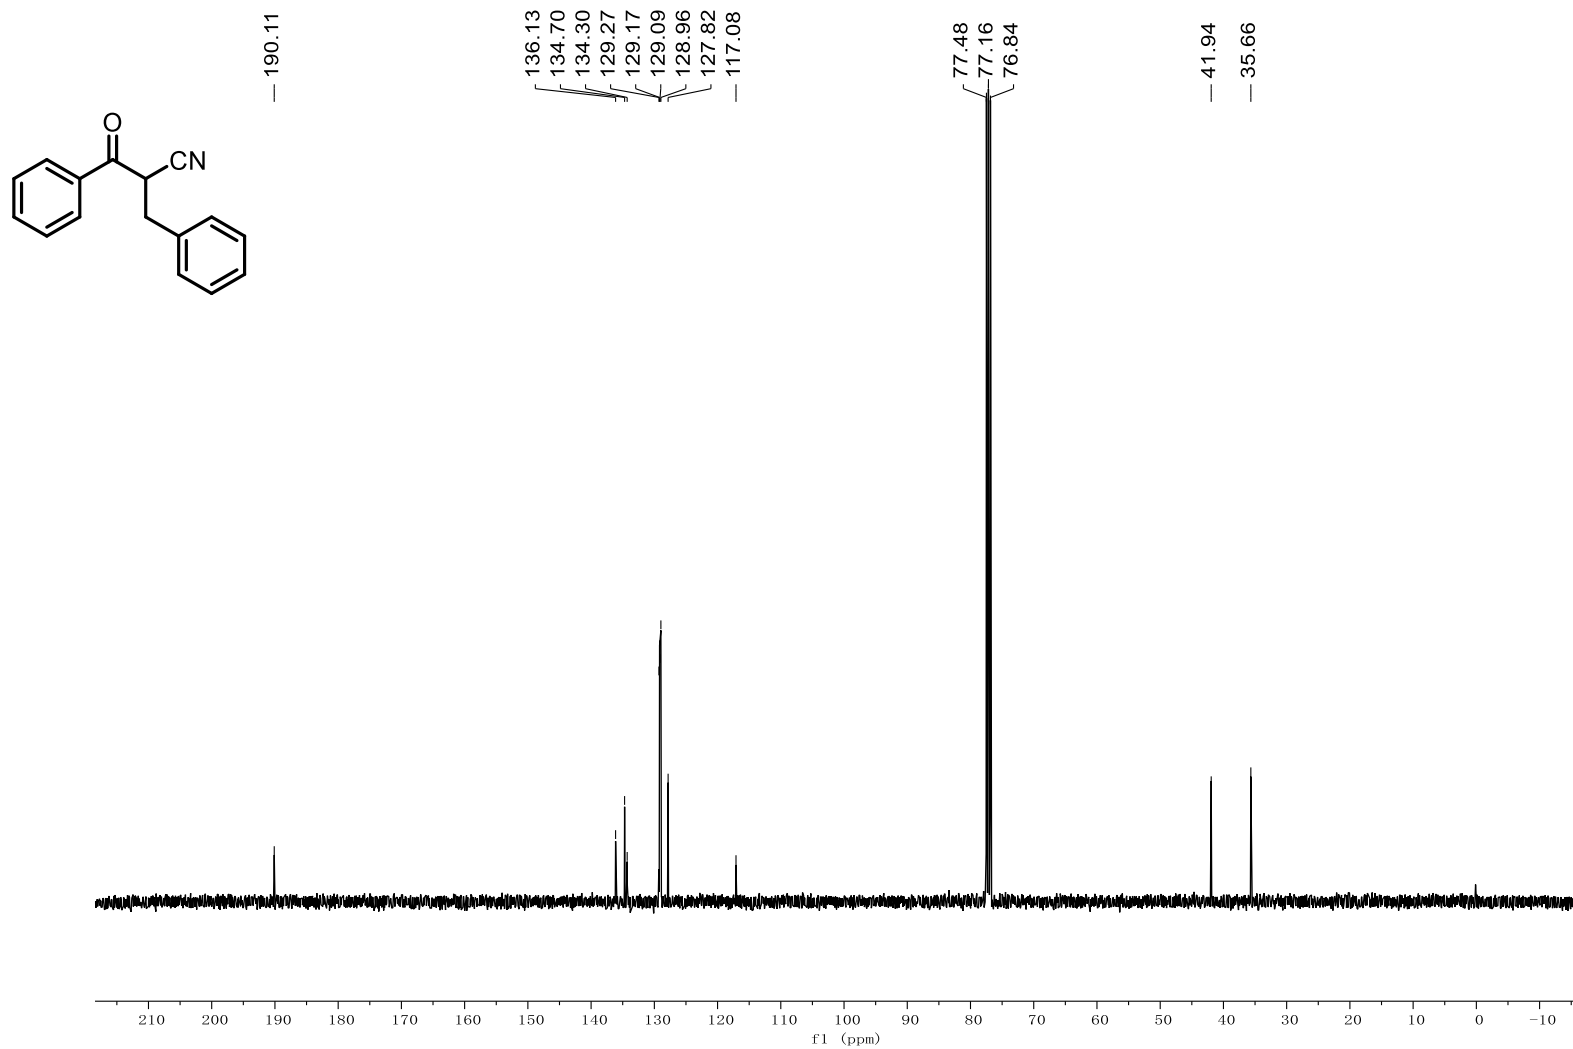

<sup>1</sup>H NMR (400 MHz, CDCl<sub>3</sub>) spectrum of 2-(4-Methoxybenzyl)-3-oxo-3-phenylpropanenitrile (38)

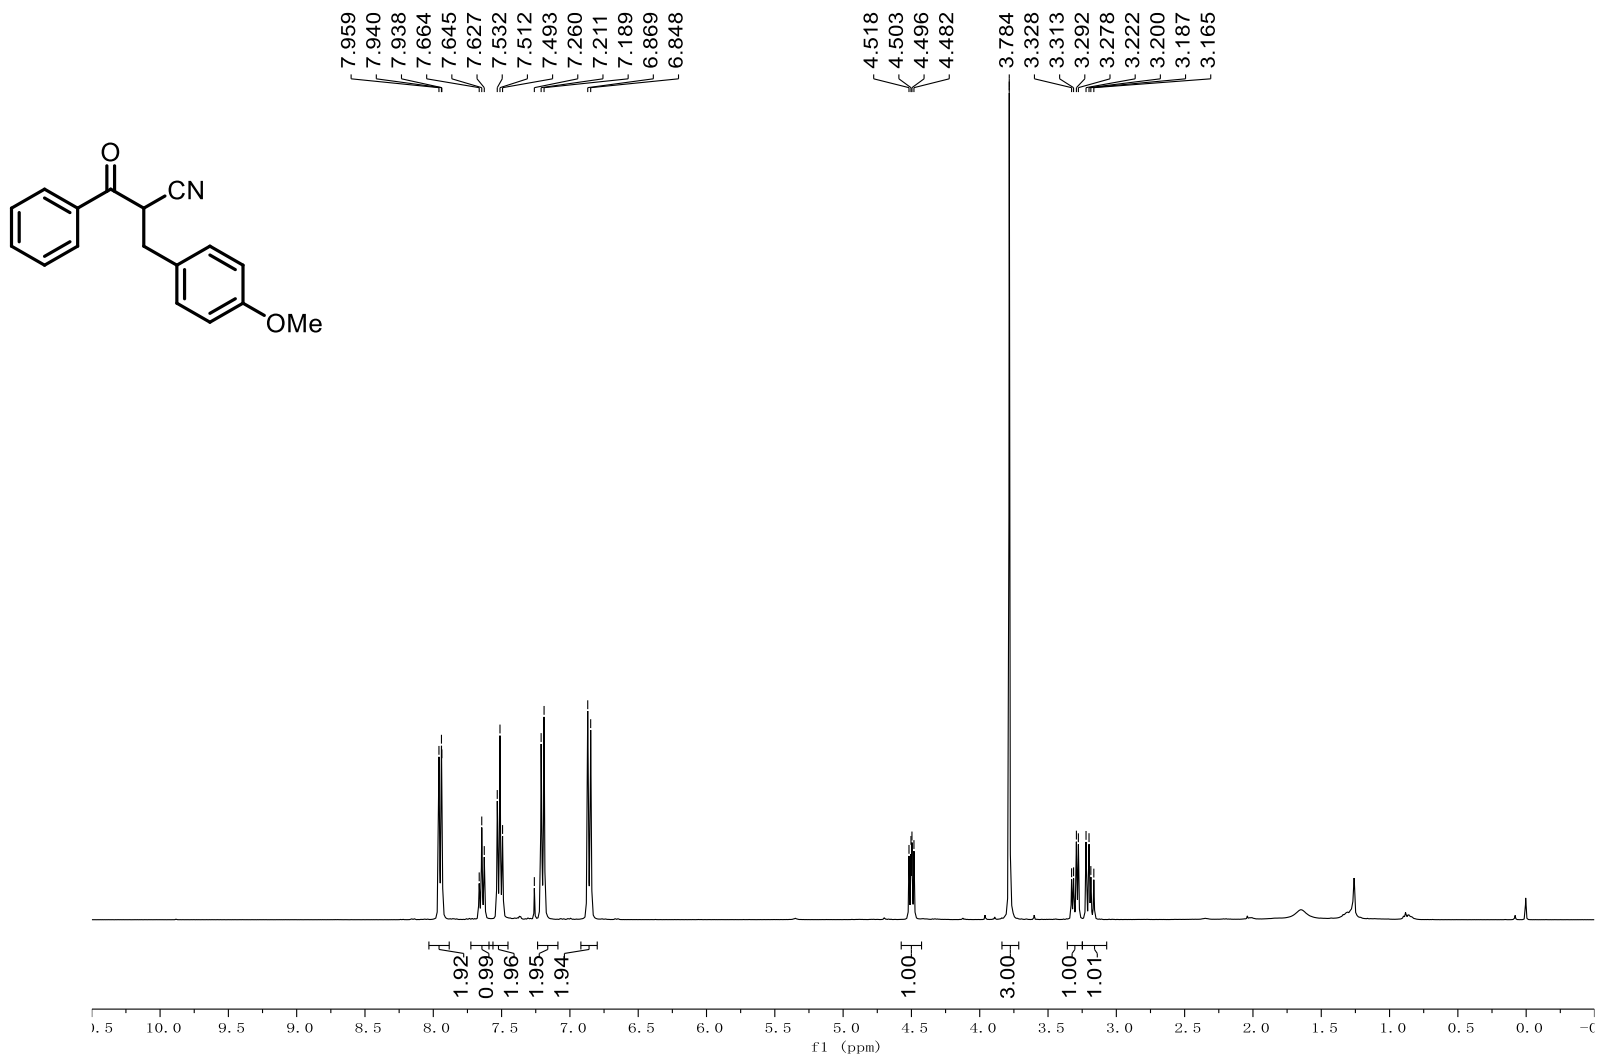

<sup>13</sup>C NMR (100 MHz, CDCl<sub>3</sub>) spectrum of 2-(4-Methoxybenzyl)-3-oxo-3-phenylpropanenitrile (38)

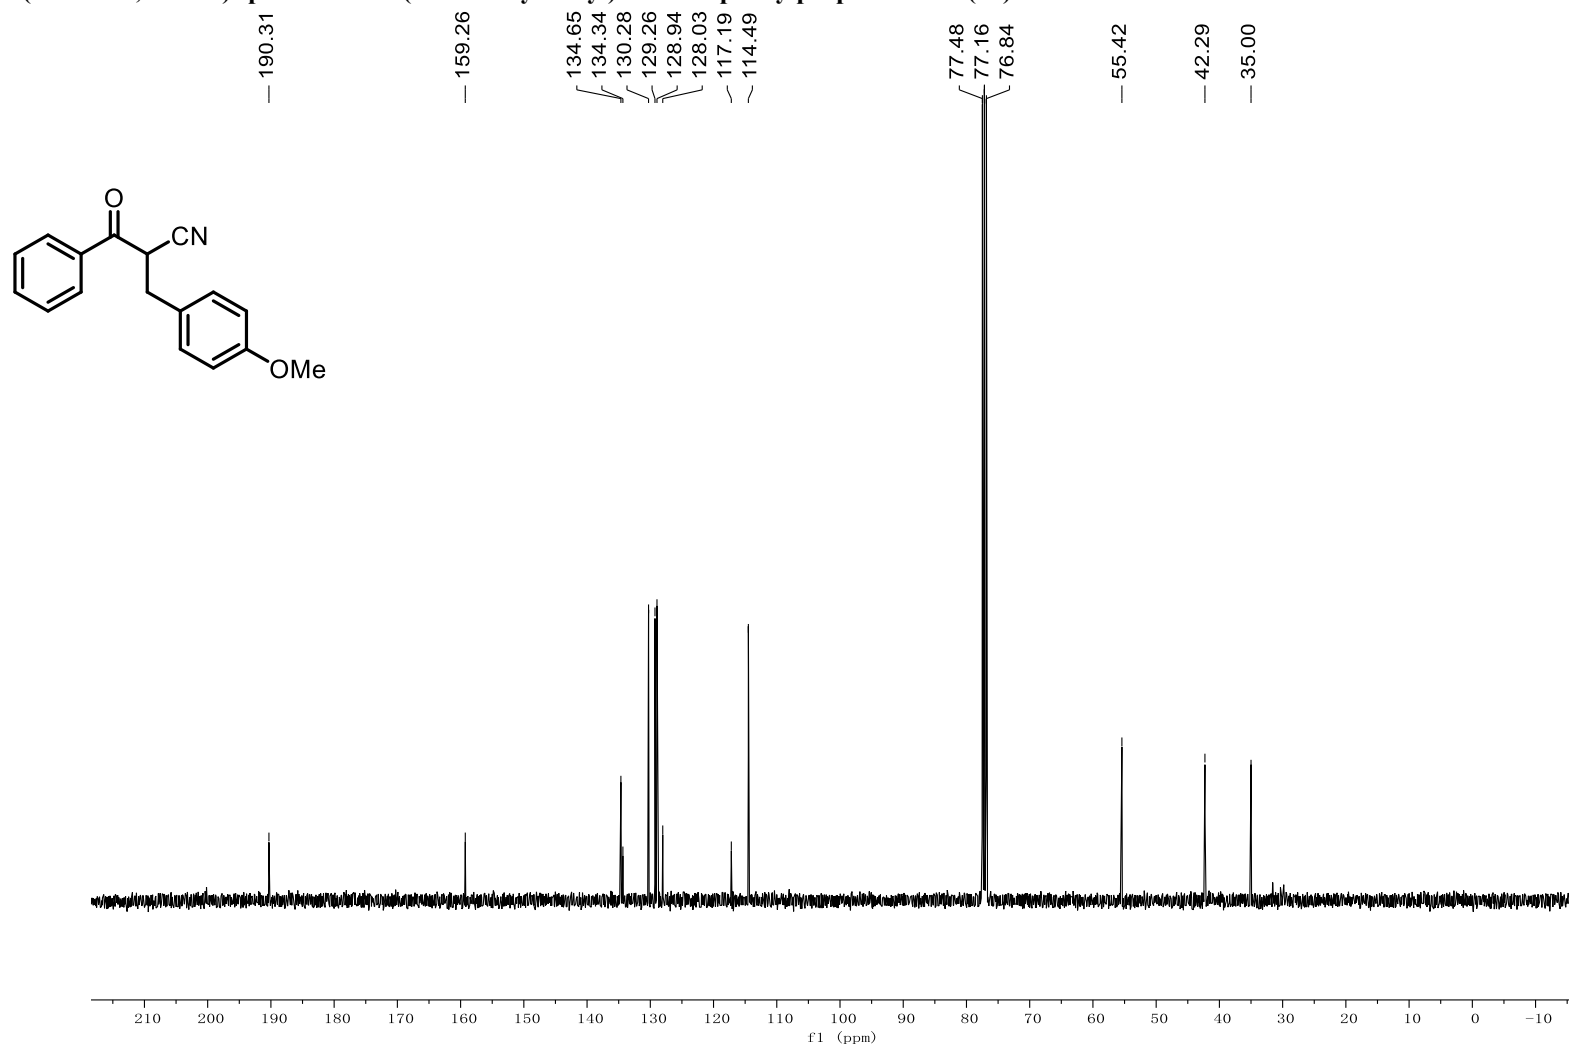

**<sup>1</sup>H NMR (400 MHz, CDCl<sub>3</sub>) spectrum of 2-(4-Fluorobenzyl)-3-oxo-3-phenylpropanenitrile (39)**

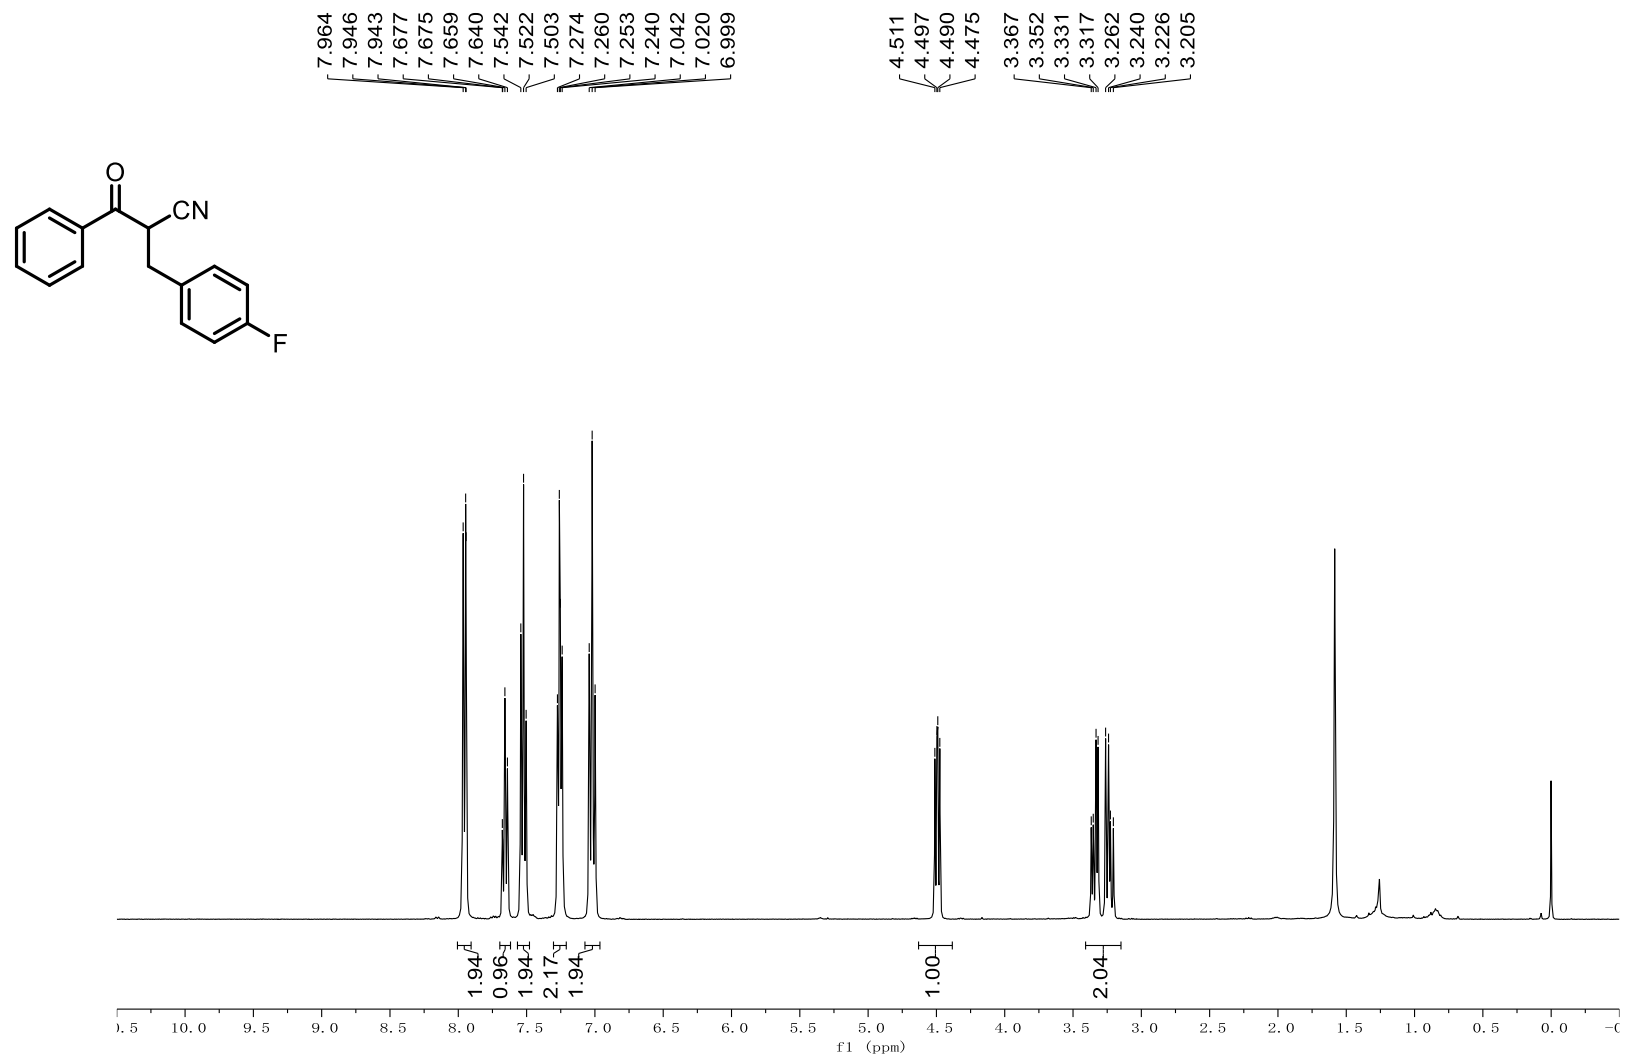

<sup>13</sup>C NMR (100 MHz, CDCl<sub>3</sub>) spectrum of 2-(4-Fluorobenzyl)-3-oxo-3-phenylpropanenitrile (39)

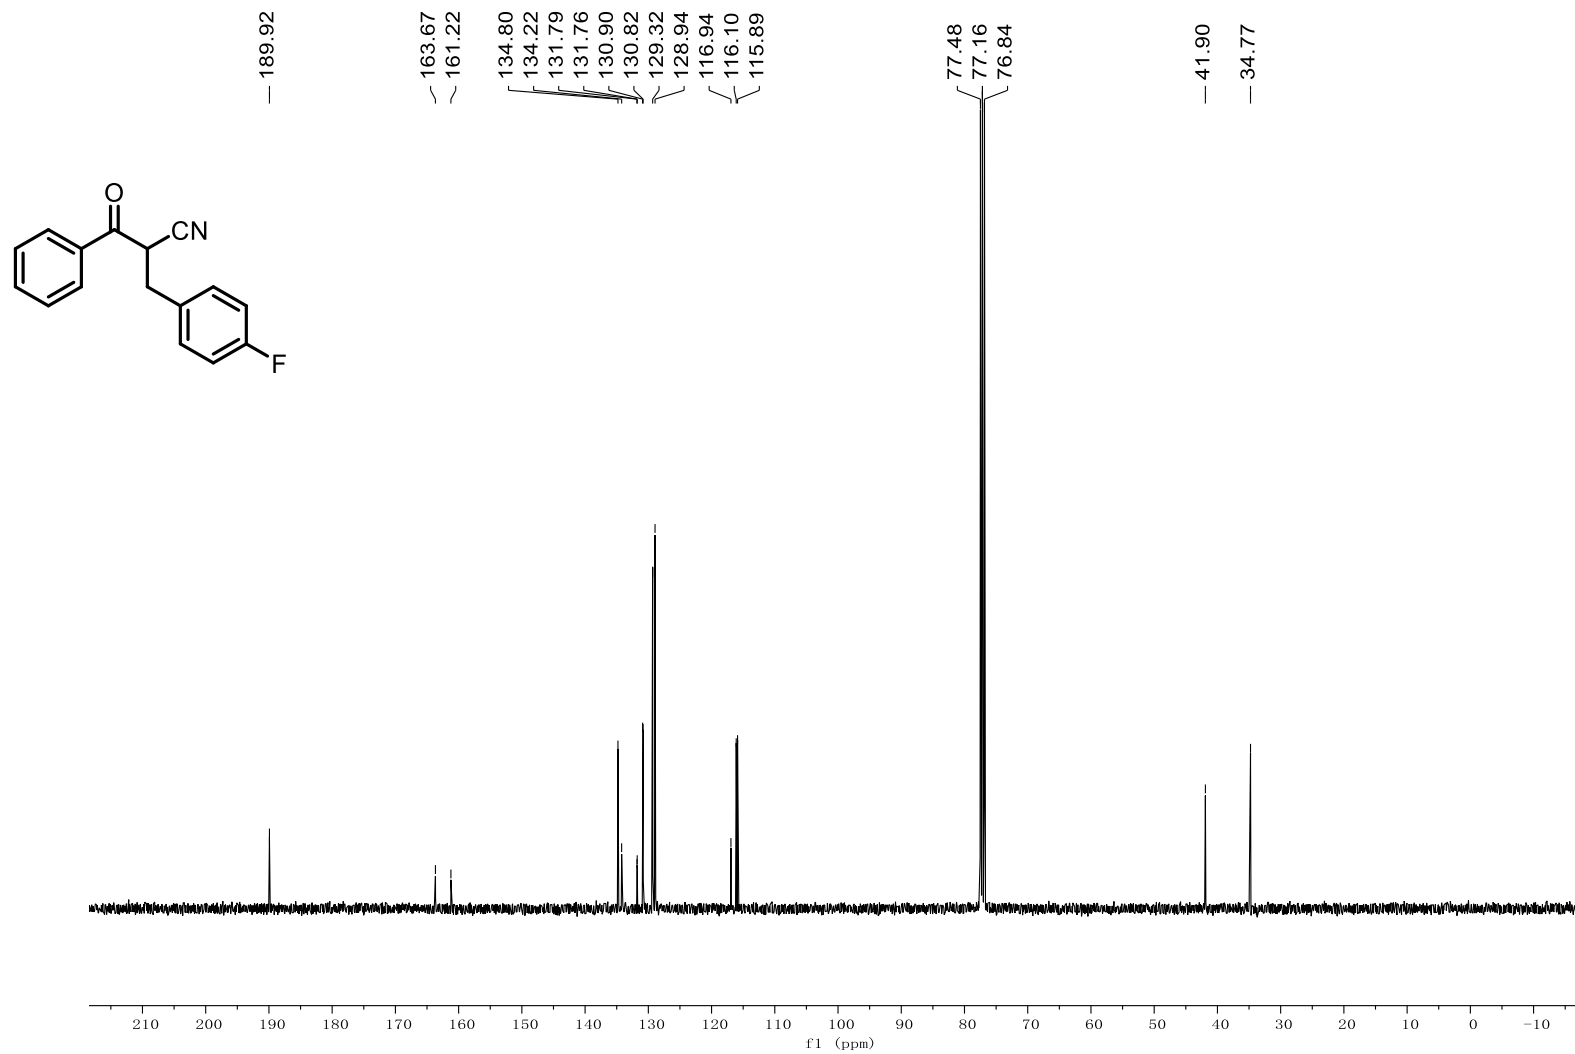

**$^{19}\text{F}$  NMR (376 MHz,  $\text{CDCl}_3$ ) spectrum of 2-(4-Fluorobenzyl)-3-oxo-3-phenylpropanenitrile (39)**

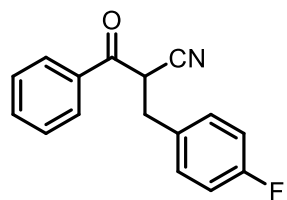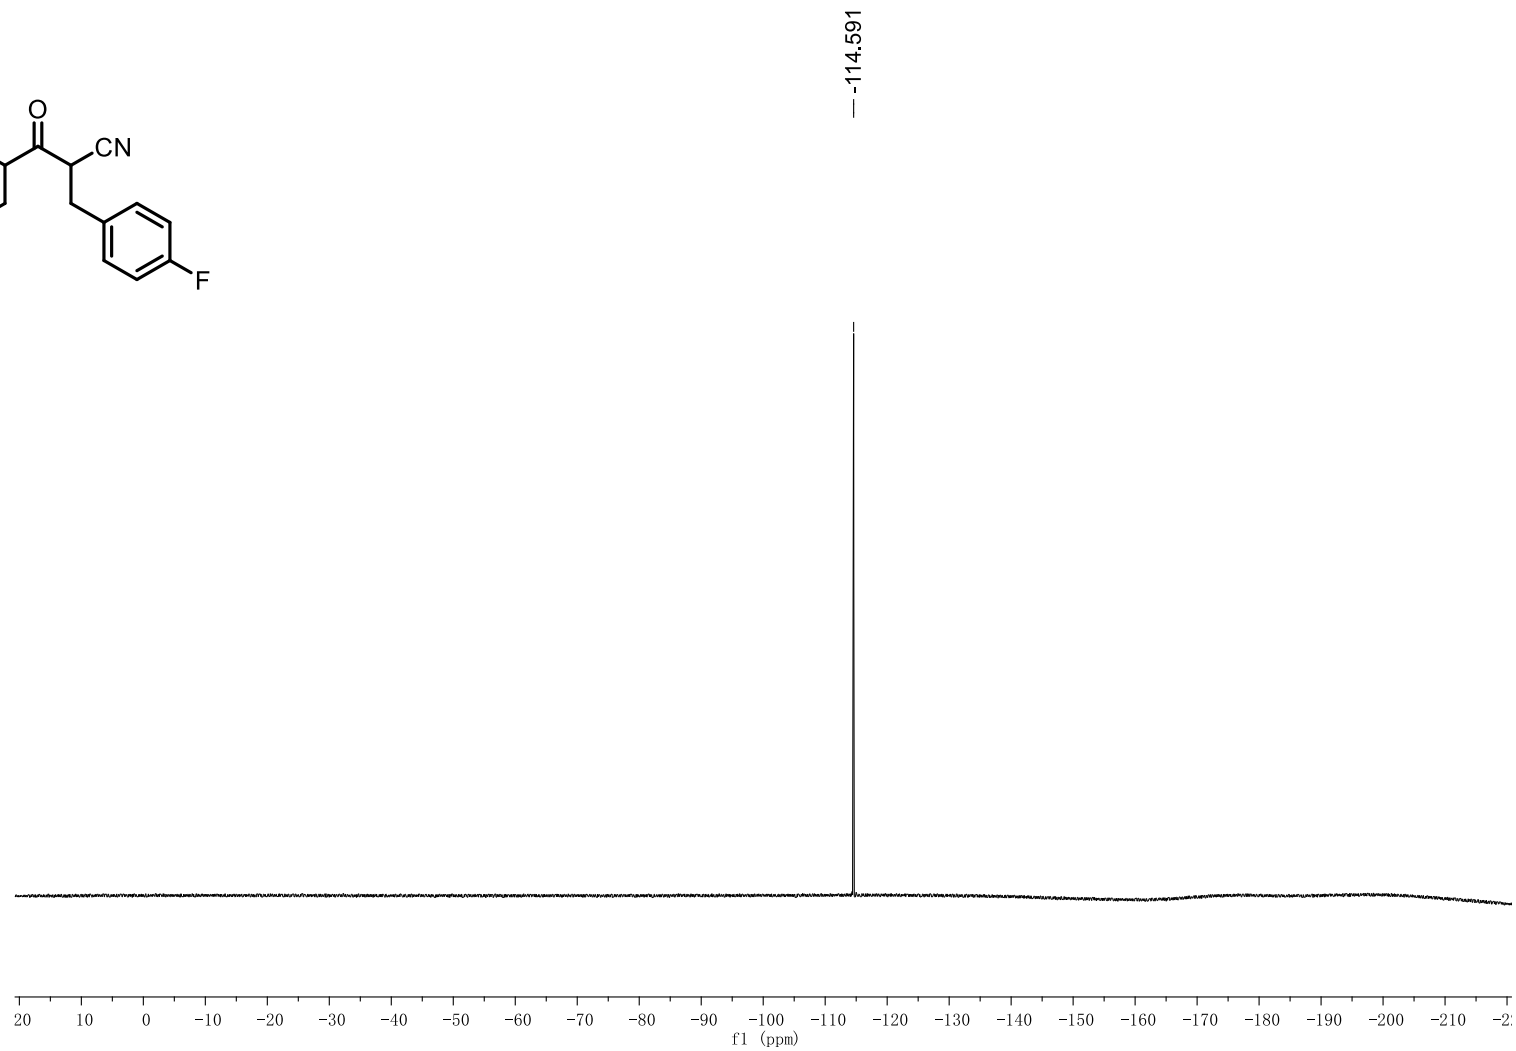

<sup>1</sup>H NMR (400 MHz, CDCl<sub>3</sub>) spectrum of 3-(2-Cyano-3-oxo-3-phenylpropyl)benzonitrile (40) and 3-(3-Cyanophenyl)propanenitrile

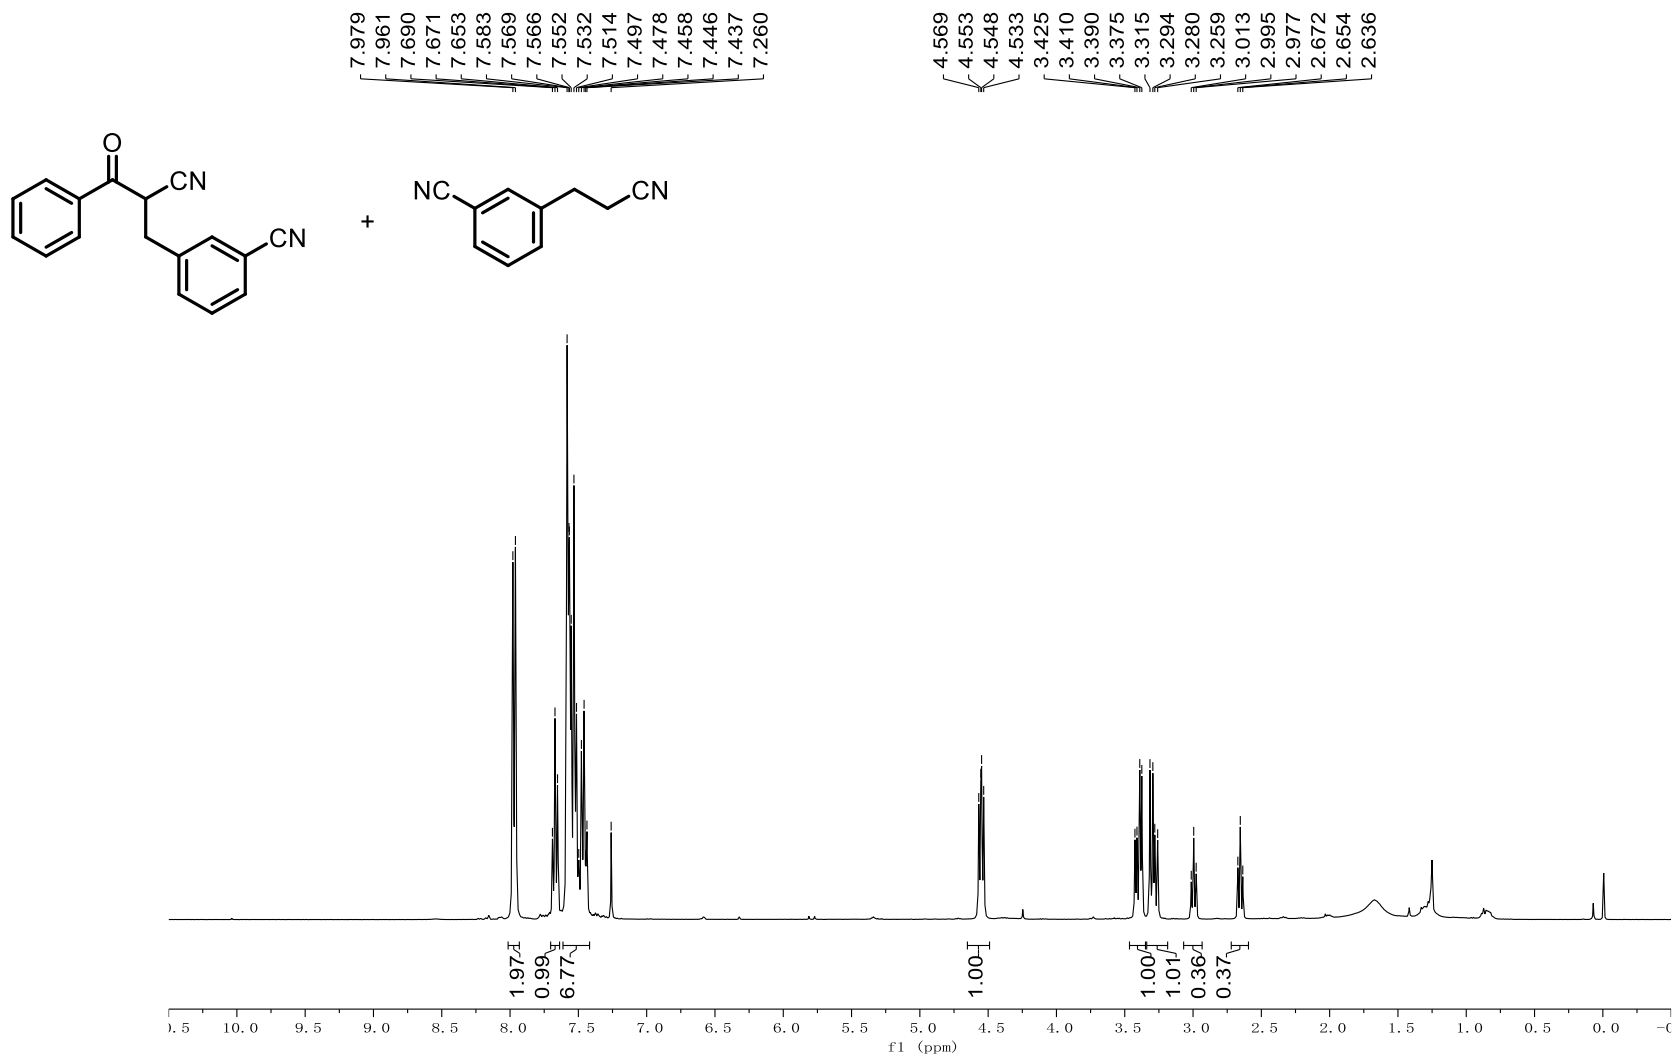

**<sup>13</sup>C NMR (100 MHz, CDCl<sub>3</sub>) spectrum of 3-(2-Cyano-3-oxo-3-phenylpropyl)benzonitrile (40) and 3-(3-Cyanophenyl)propanenitrile**

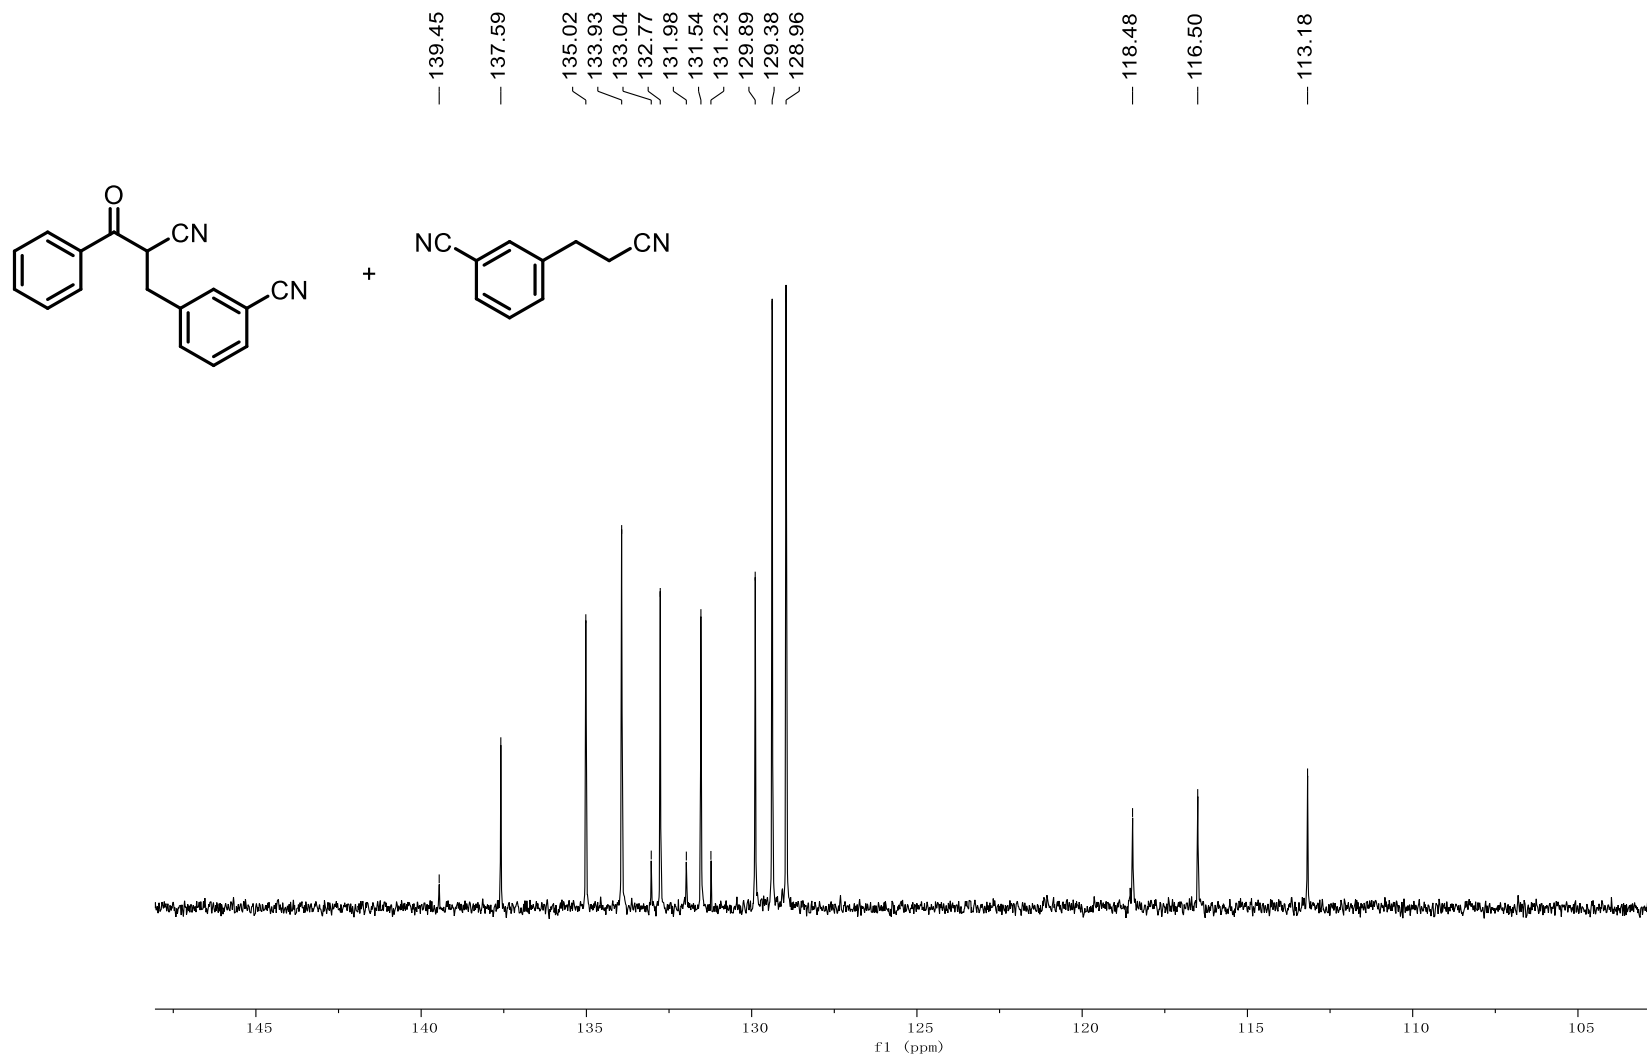

<sup>1</sup>H NMR (400 MHz, CDCl<sub>3</sub>) spectrum of 2-(3-Nitrobenzyl)-3-oxo-3-phenylpropanenitrile (41) and 3-(3-Nitrophenyl)propanenitrile

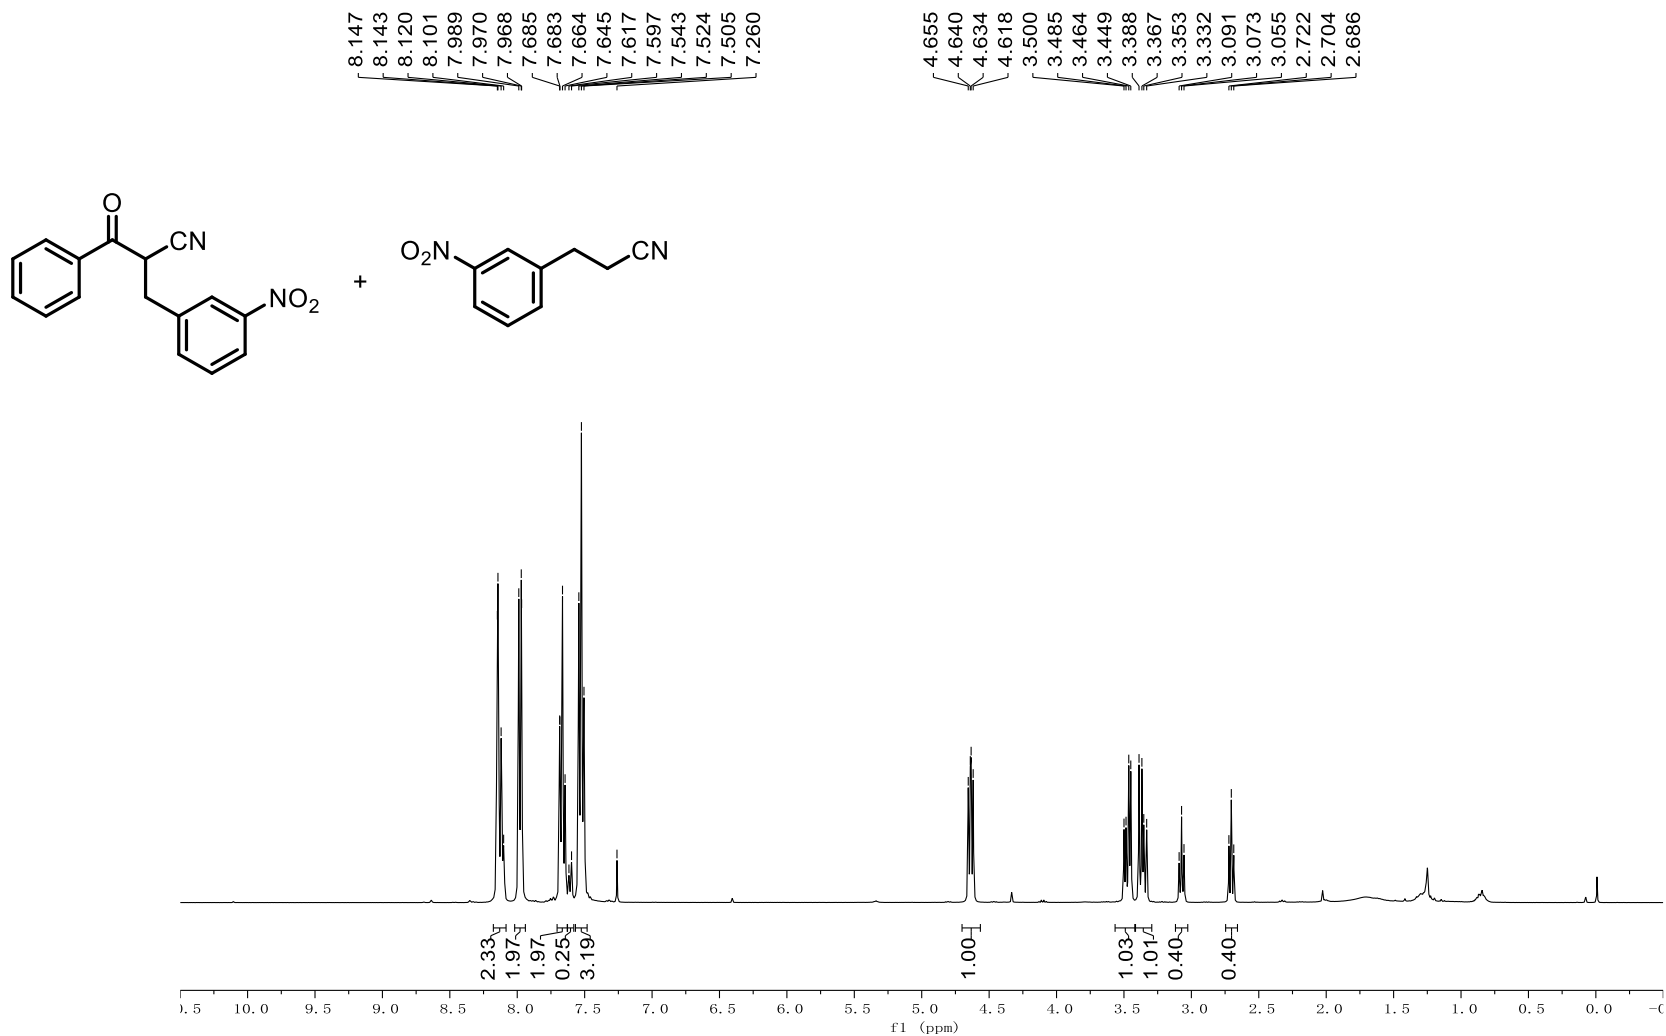

<sup>13</sup>C NMR (100 MHz, CDCl<sub>3</sub>) spectrum of 2-(3-Nitrobenzyl)-3-oxo-3-phenylpropanenitrile (41) and 3-(3-Nitrophenyl)propanenitrile

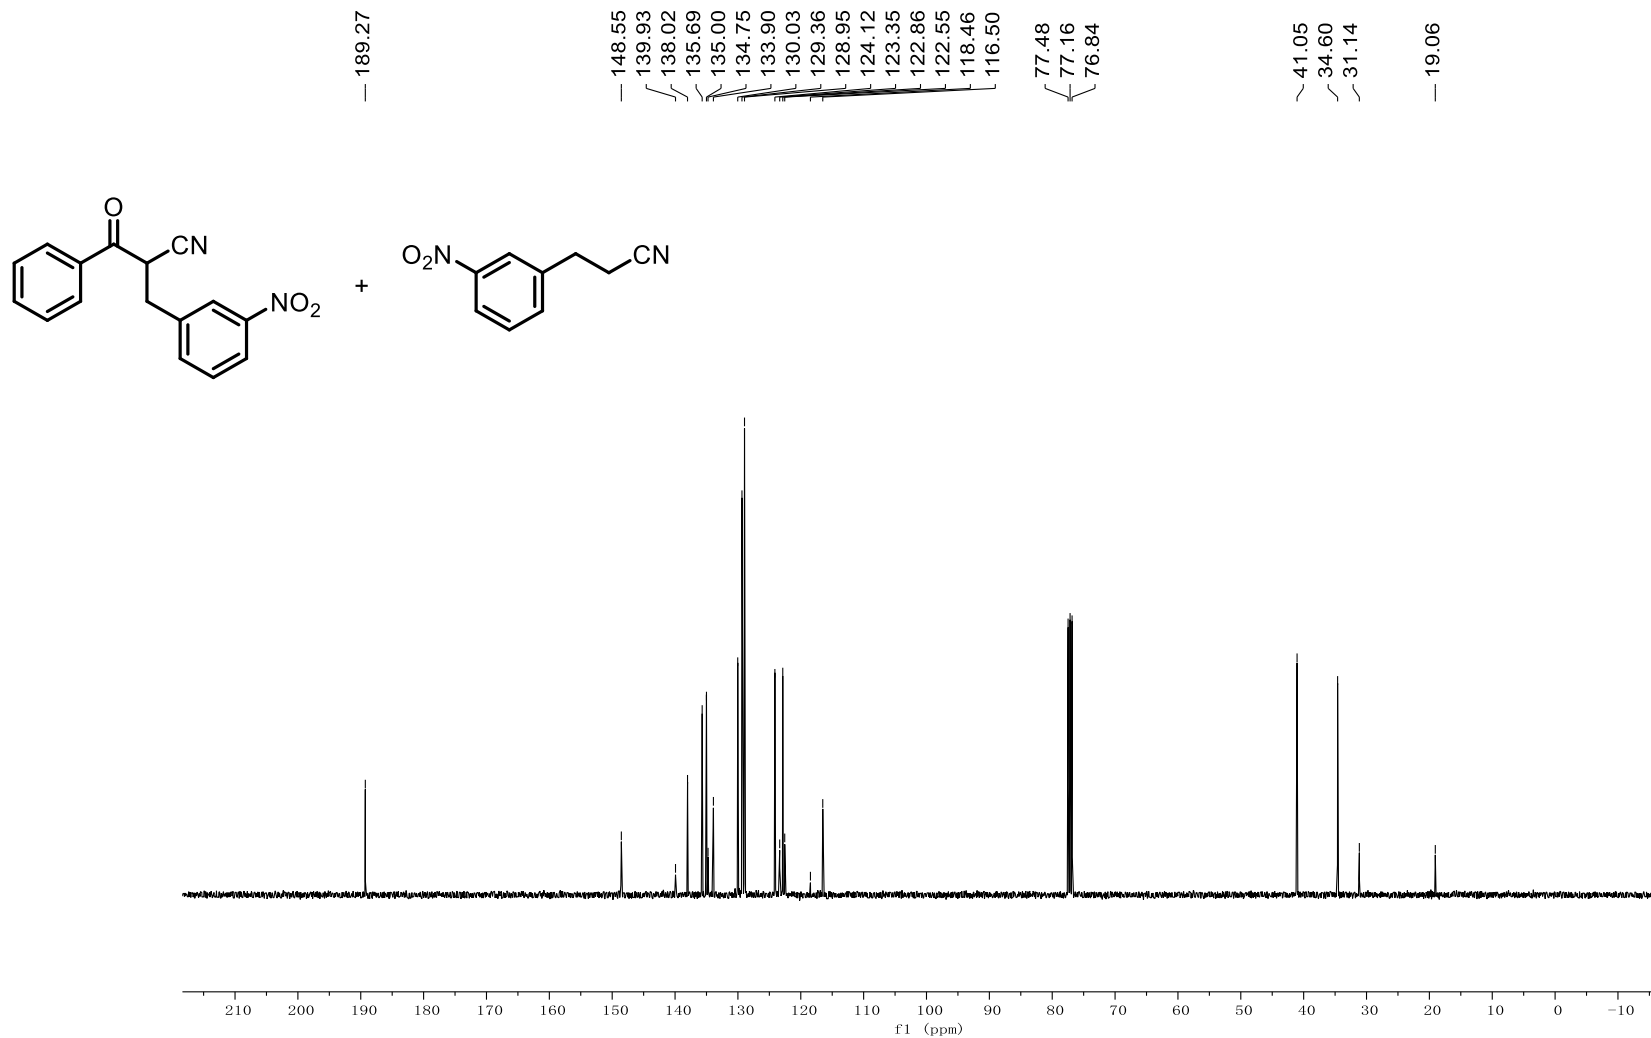

<sup>1</sup>H NMR (400 MHz, CDCl<sub>3</sub>) spectrum of 2-(2-Chlorobenzyl)-3-oxo-3-phenylpropanenitrile (42)

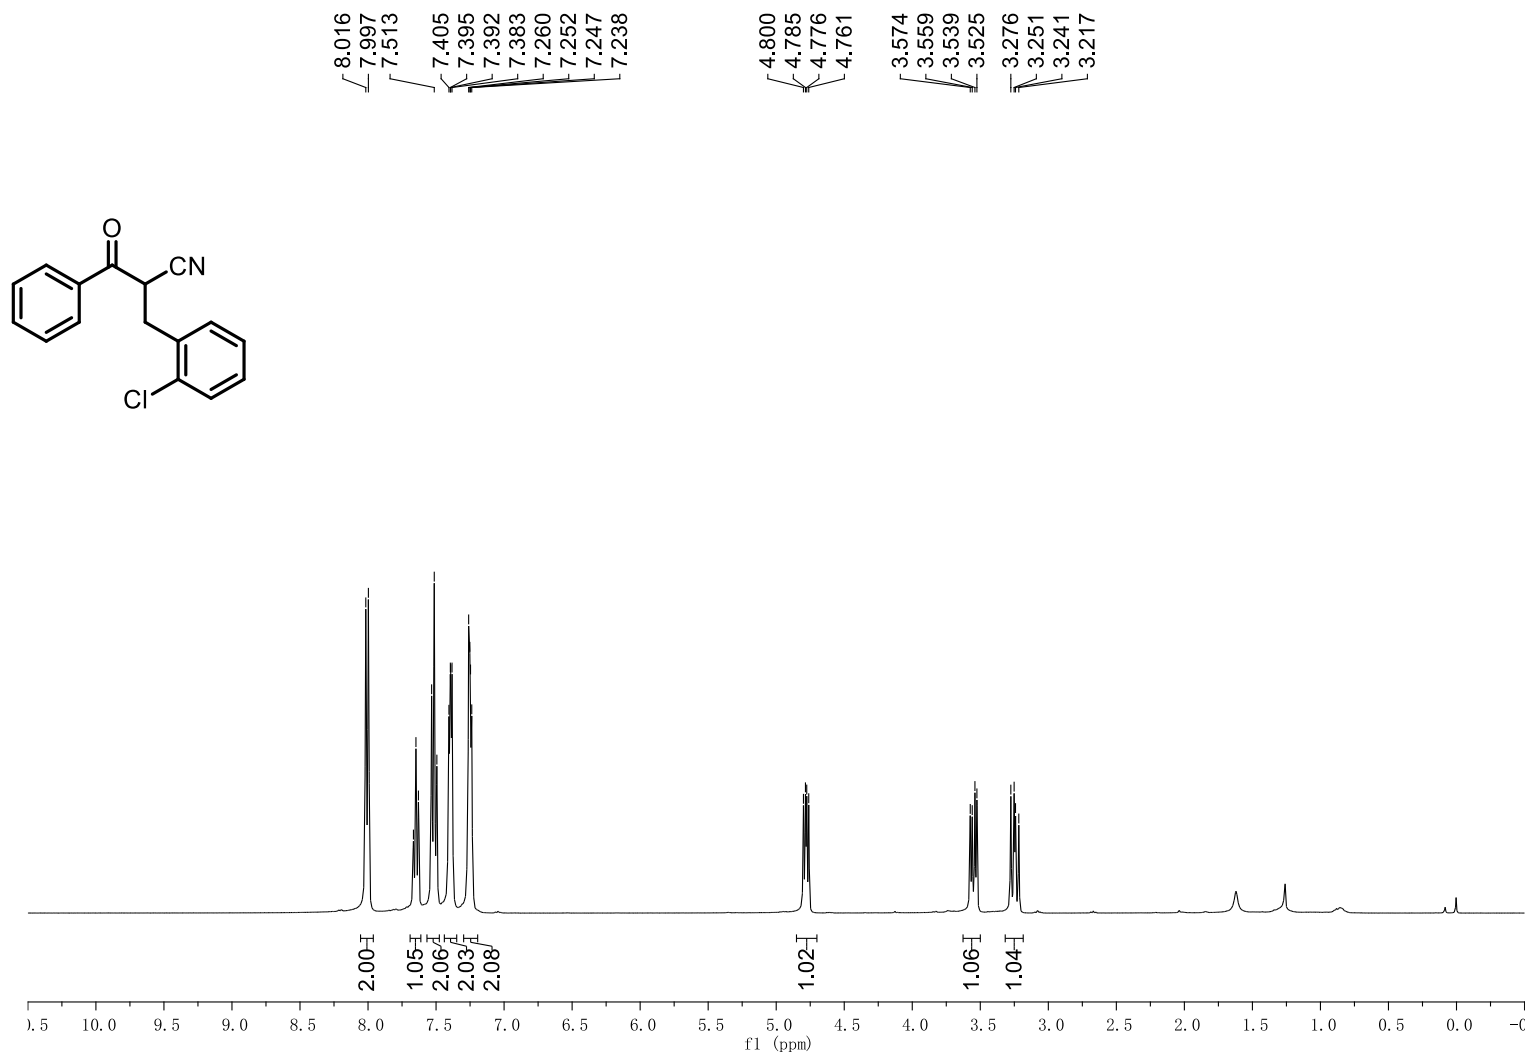

<sup>13</sup>C NMR (100 MHz, CDCl<sub>3</sub>) spectrum of 2-(2-Chlorobenzyl)-3-oxo-3-phenylpropanenitrile (42)

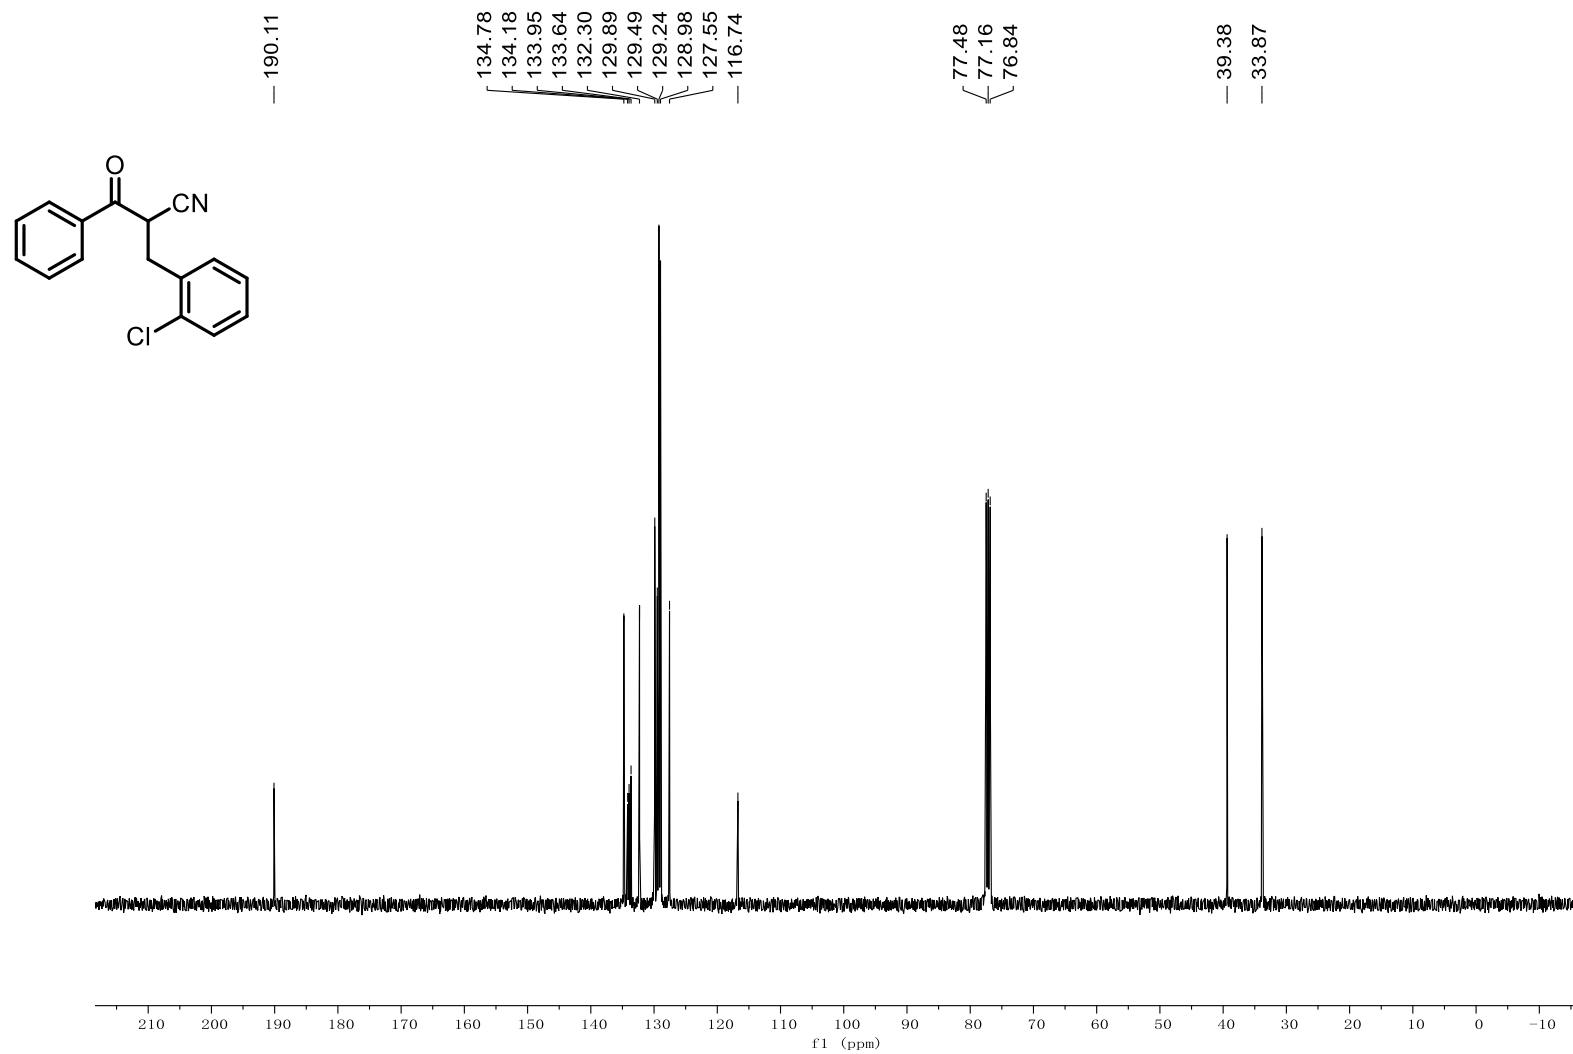

<sup>1</sup>H NMR (400 MHz, CDCl<sub>3</sub>) spectrum of 2-(Oxetan-3-yl)-3-oxo-3-phenylpropanenitrile (43)

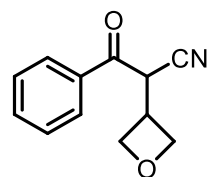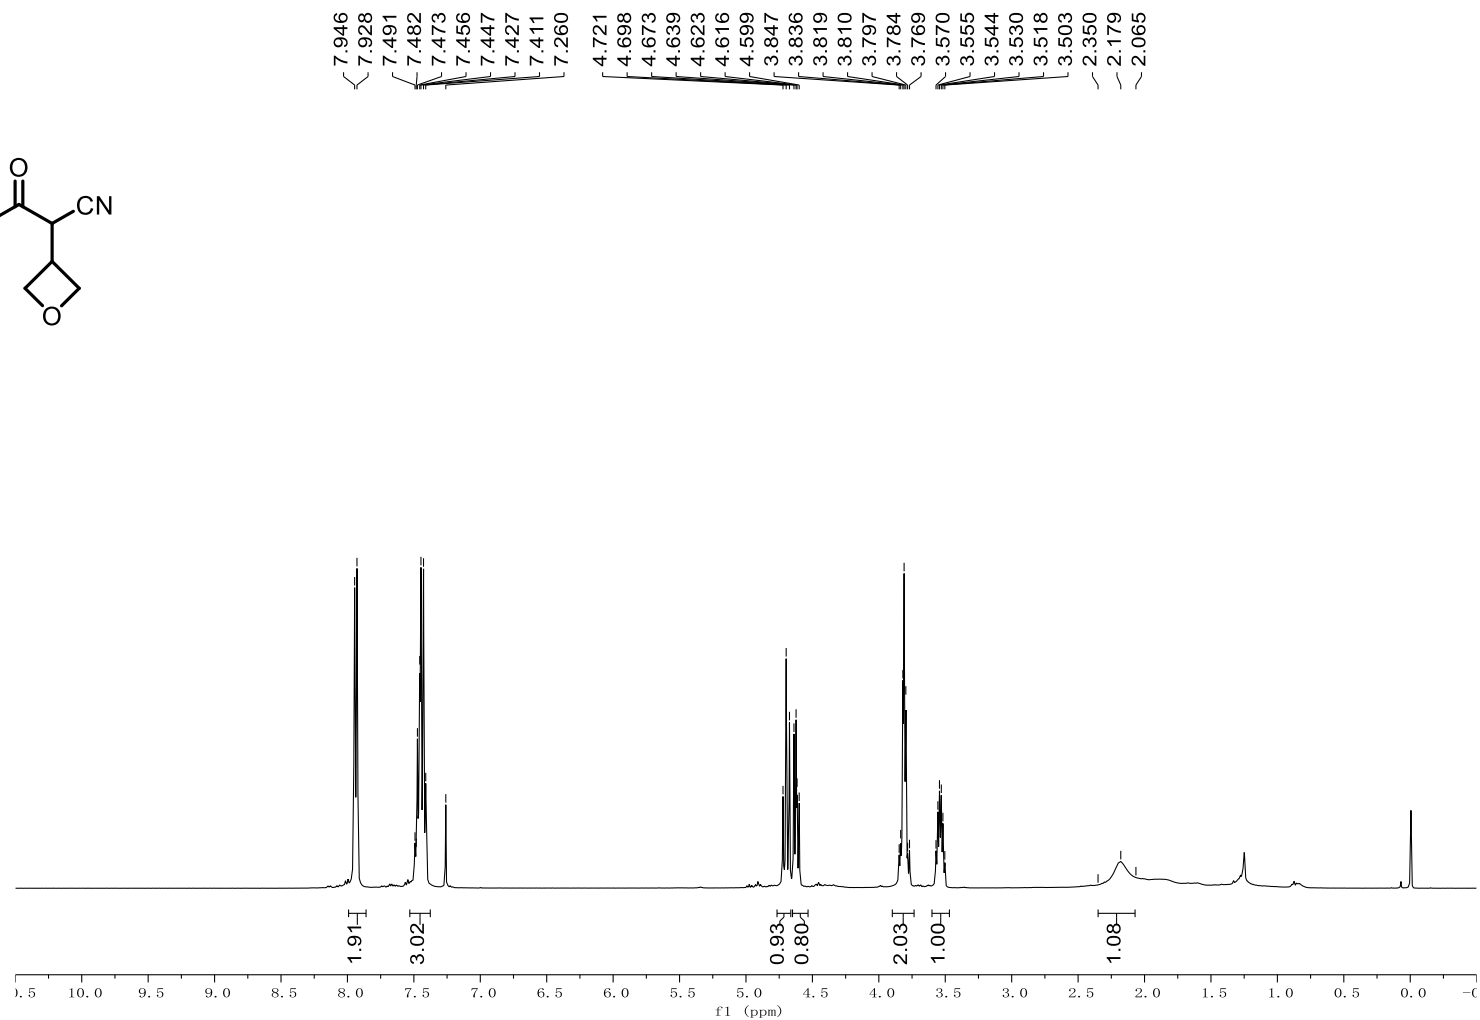

**$^{13}\text{C}$  NMR (100 MHz,  $\text{CDCl}_3$ ) spectrum of 2-(Oxetan-3-yl)-3-oxo-3-phenylpropanenitrile (43)**

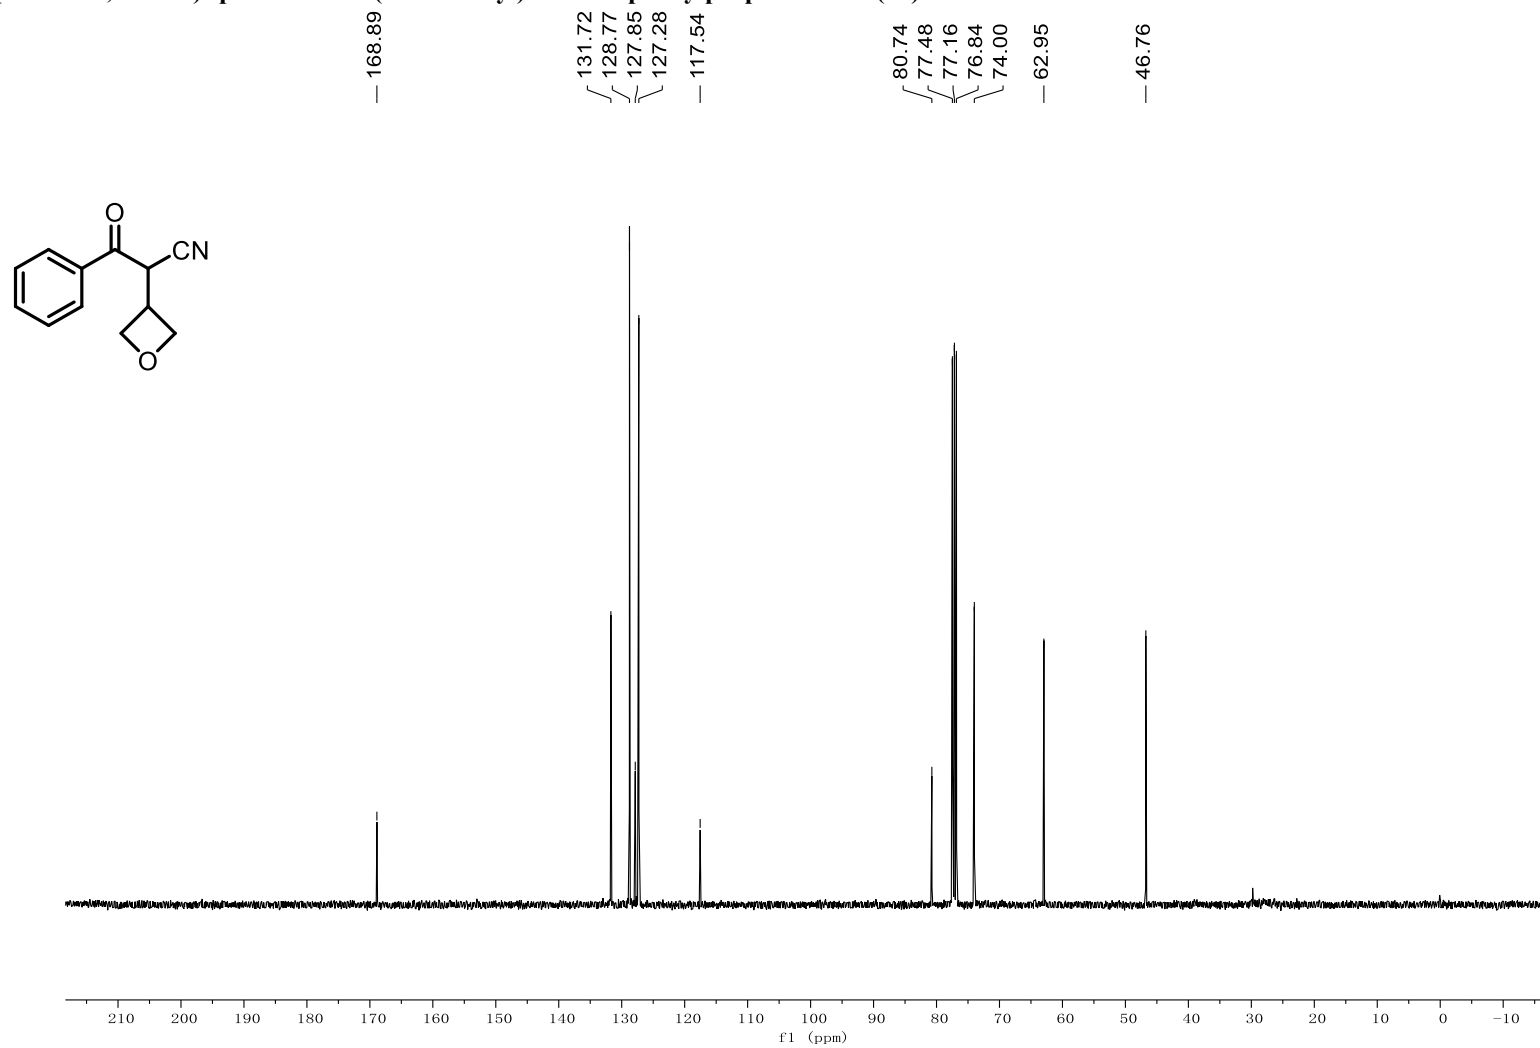

<sup>1</sup>H NMR (400 MHz, Benzene-*d*<sub>6</sub>) spectrum of *tert*-Butyl 3-(1-cyano-2-oxo-2-phenylethyl)azetidine-1-carboxylate (44)

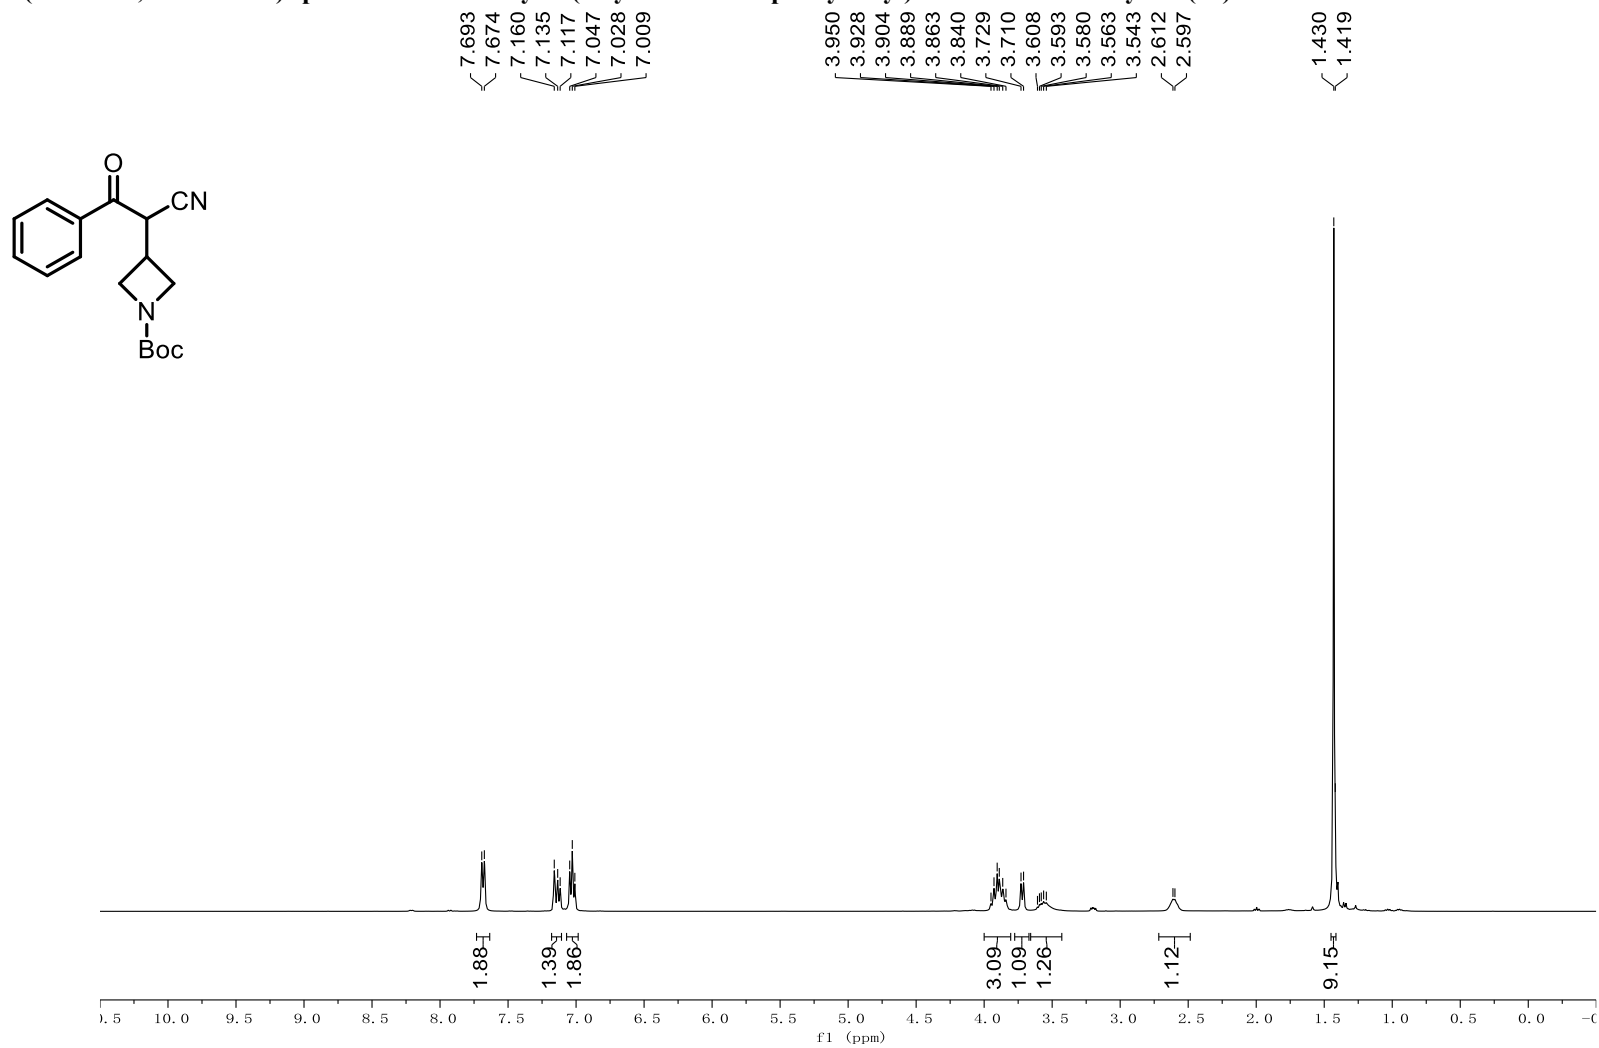

<sup>13</sup>C NMR (100 MHz, Benzene-*d*<sub>6</sub>) spectrum of *tert*-Butyl 3-(1-cyano-2-oxo-2-phenylethyl)azetidine-1-carboxylate (44)

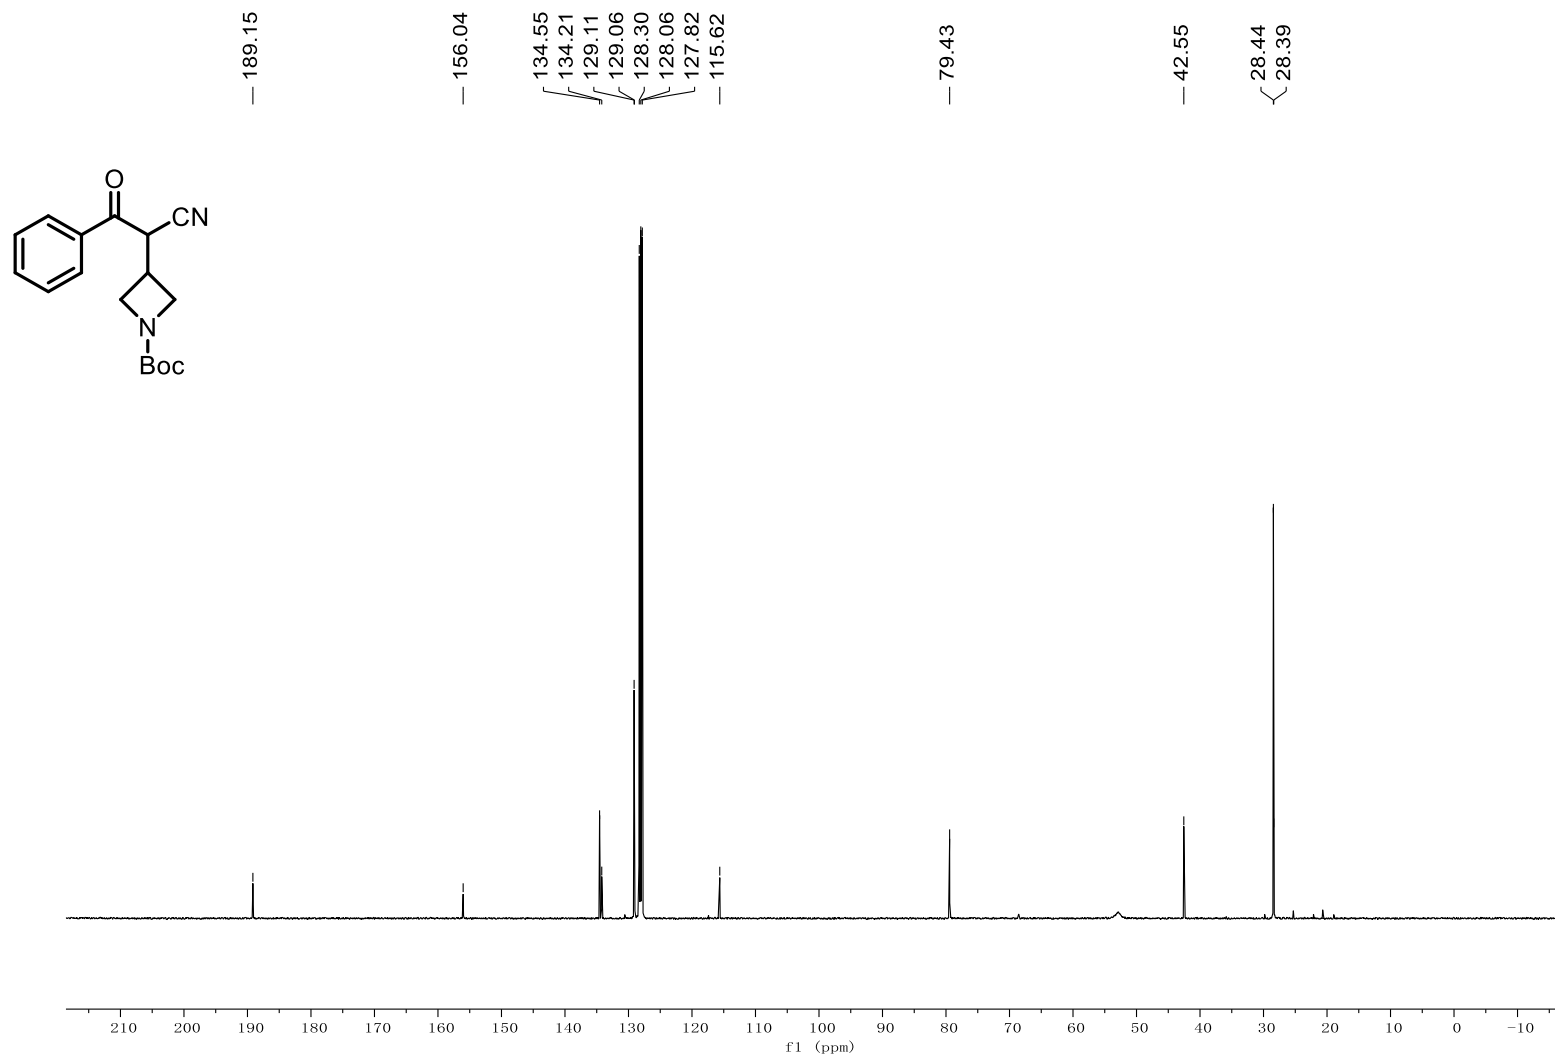

<sup>1</sup>H NMR (400 MHz, CDCl<sub>3</sub>) spectrum of 2-Methyl-2-(4-methylbenzoyl)pentanedinitrile (45)

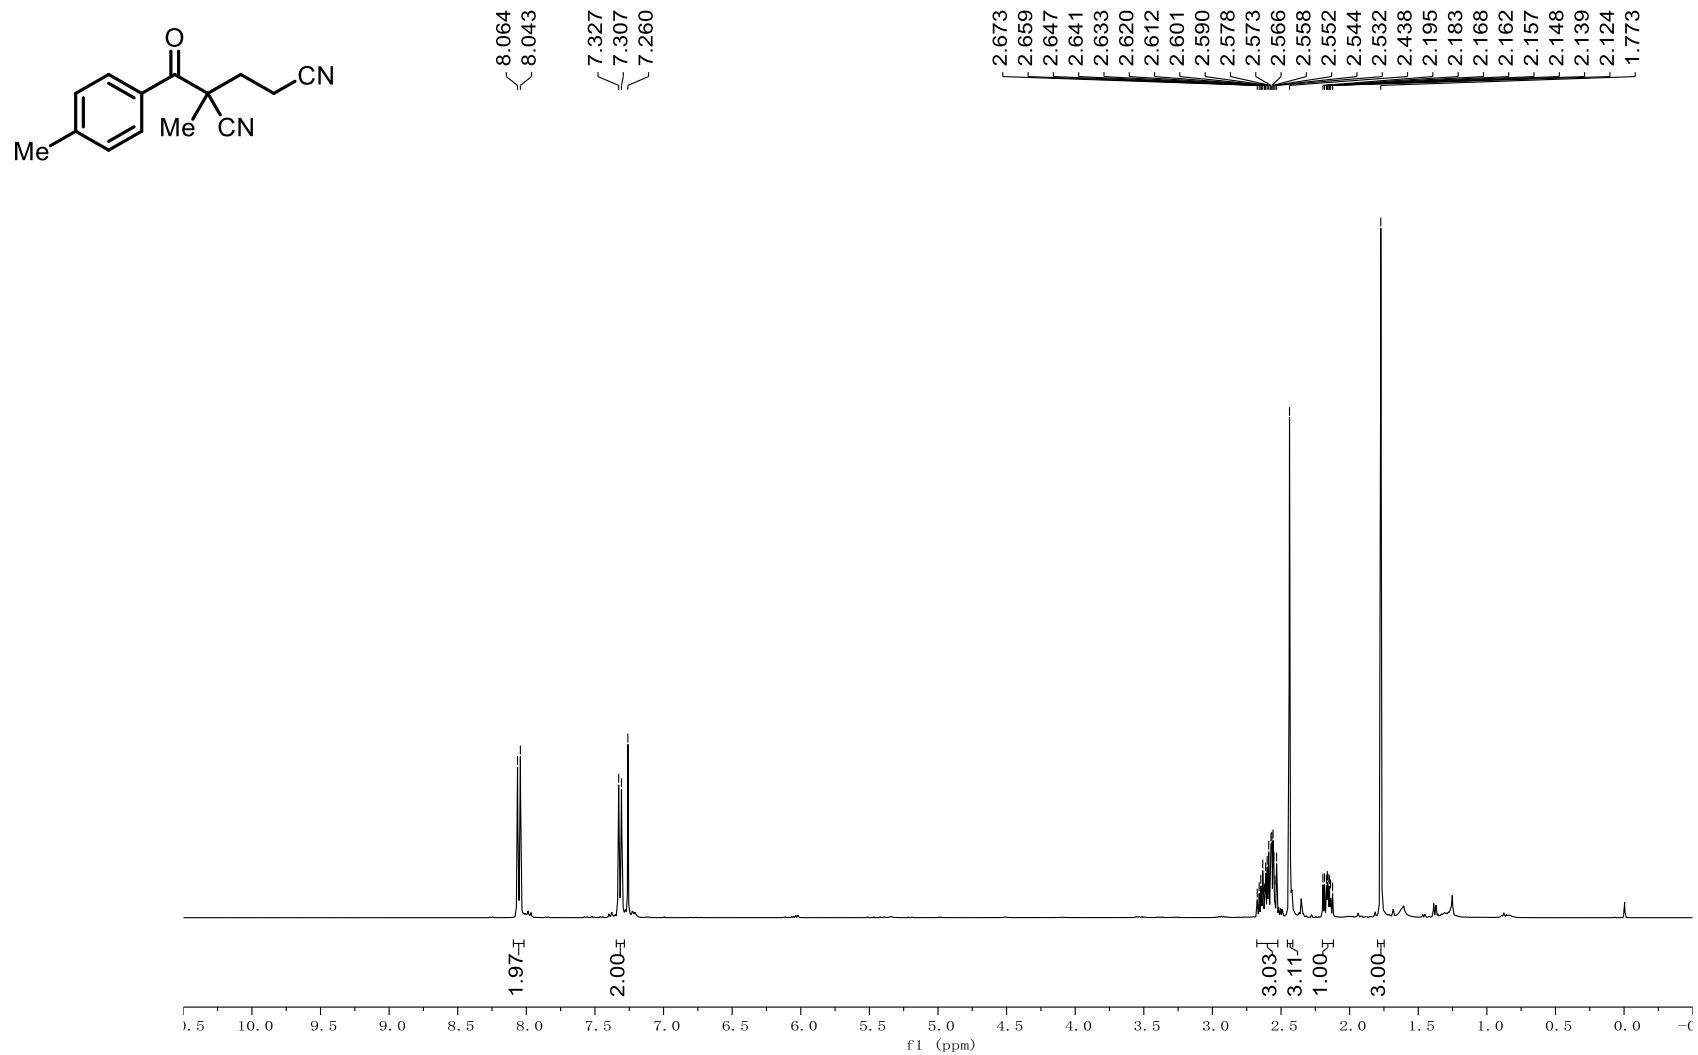

<sup>13</sup>C NMR (100 MHz, CDCl<sub>3</sub>) spectrum of 2-Methyl-2-(4-methylbenzoyl)pentanedinitrile (45)

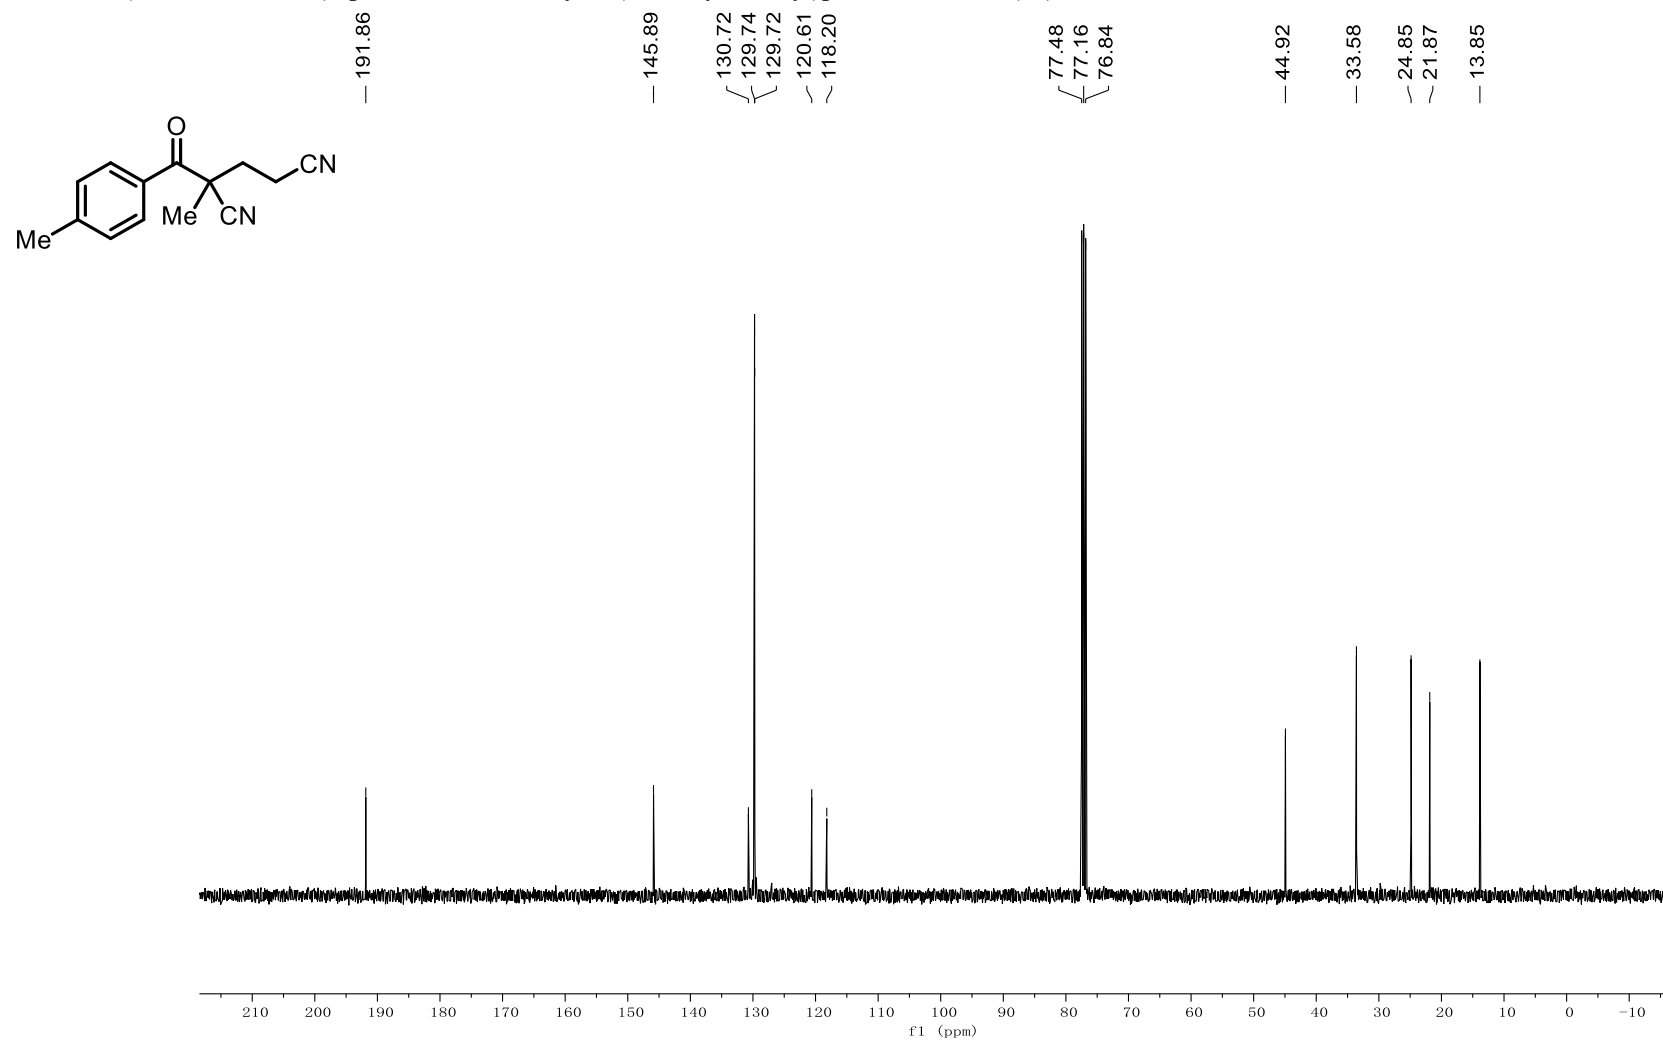

<sup>1</sup>H NMR (400 MHz, CDCl<sub>3</sub>) spectrum of 2-(4-(*tert*-Butyl)benzoyl)-2-methylpentanedinitrile (46)

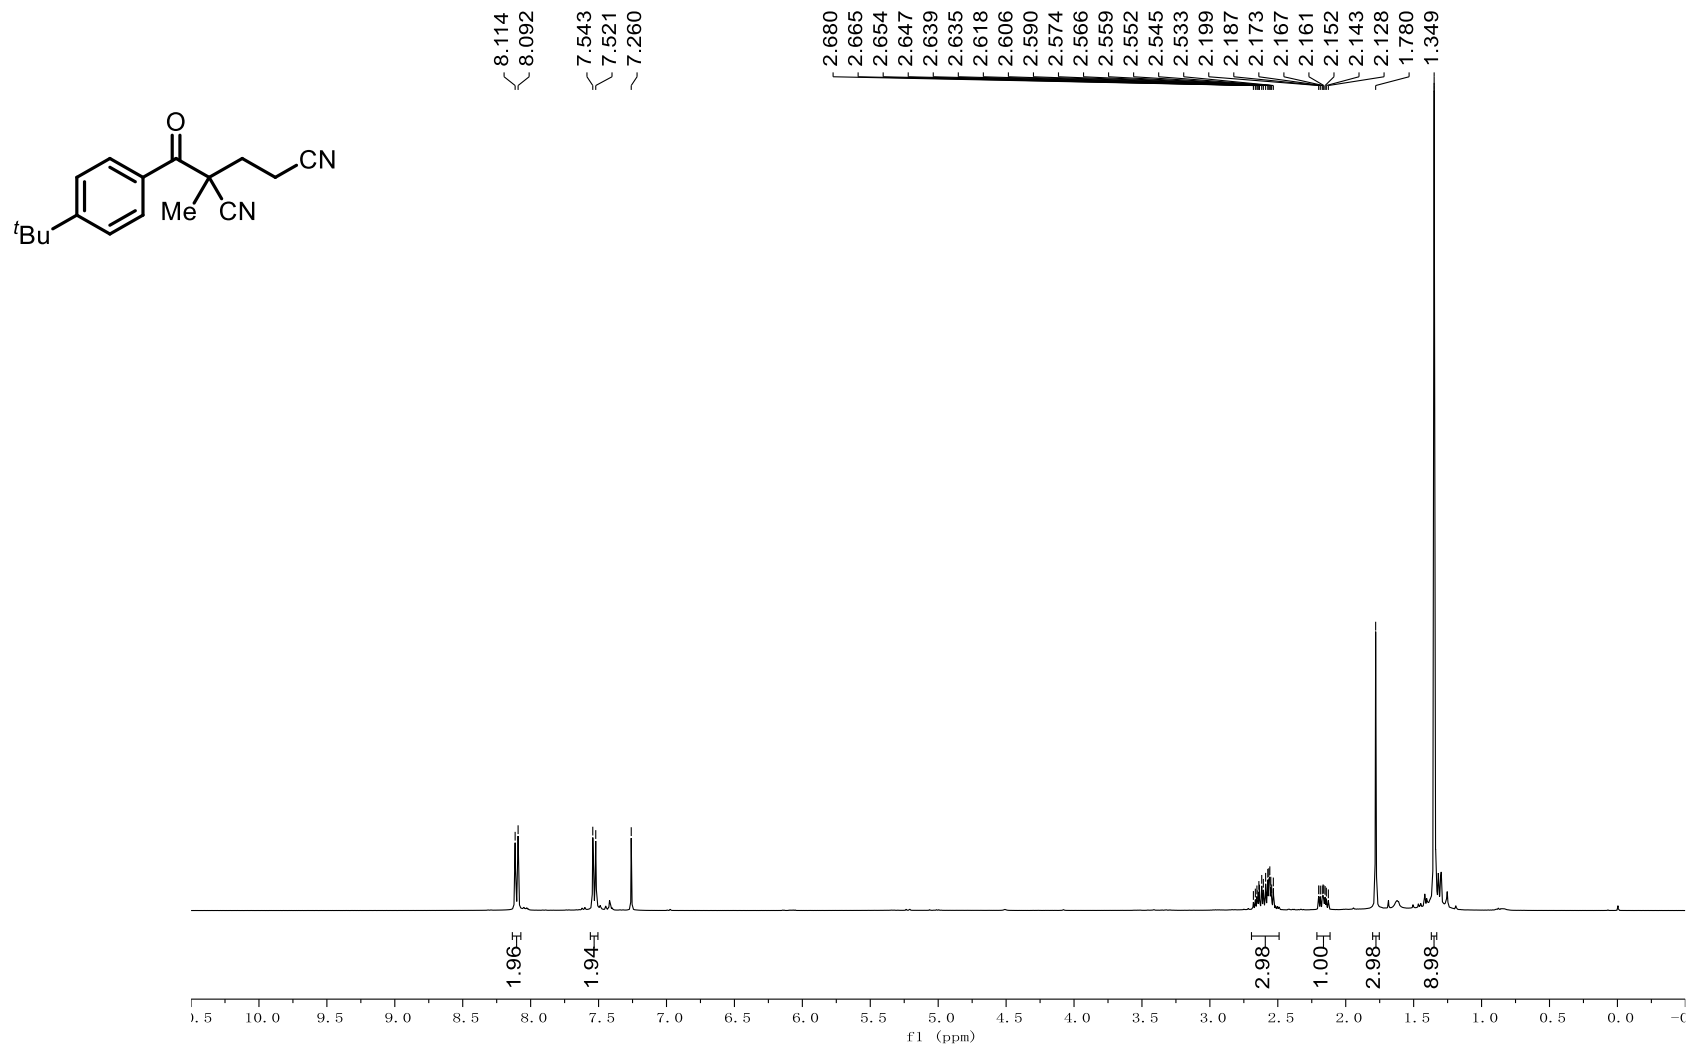

<sup>13</sup>C NMR (100 MHz, CDCl<sub>3</sub>) spectrum of 2-(4-(*tert*-Butyl)benzoyl)-2-methylpentanedinitrile (46)

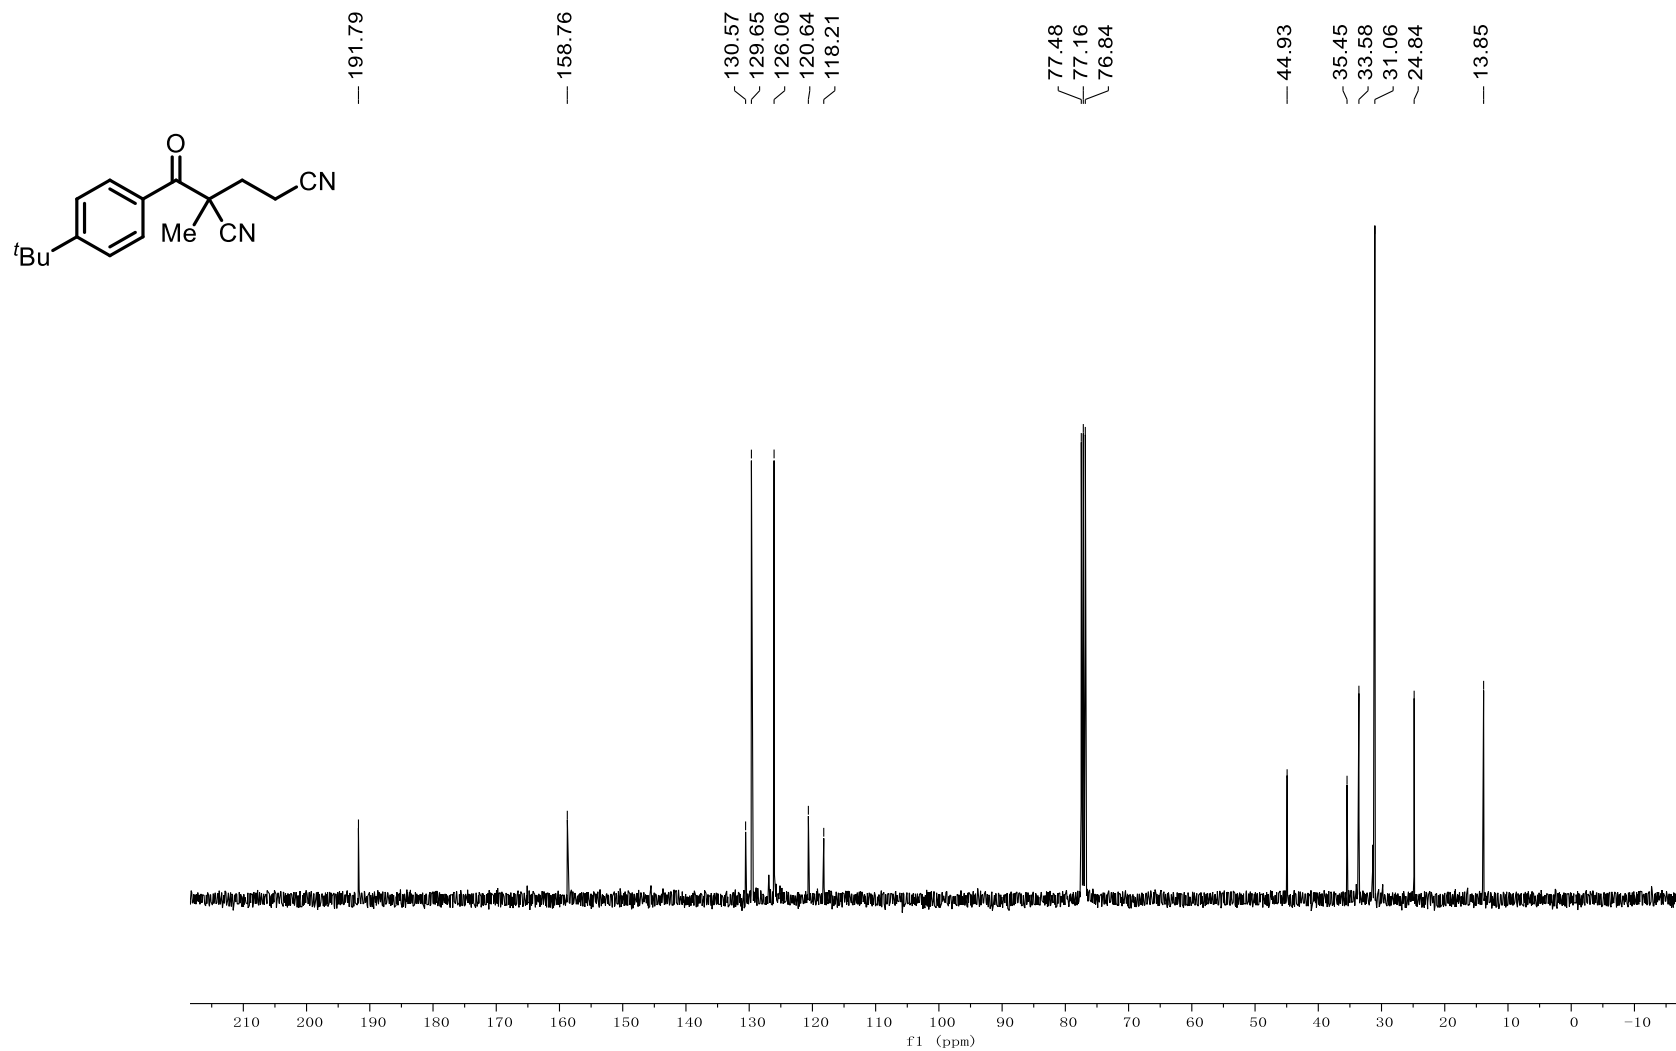

<sup>1</sup>H NMR (400 MHz, CDCl<sub>3</sub>) spectrum of 2-(4-Methoxybenzoyl)-2-methylpentanedinitrile (47)

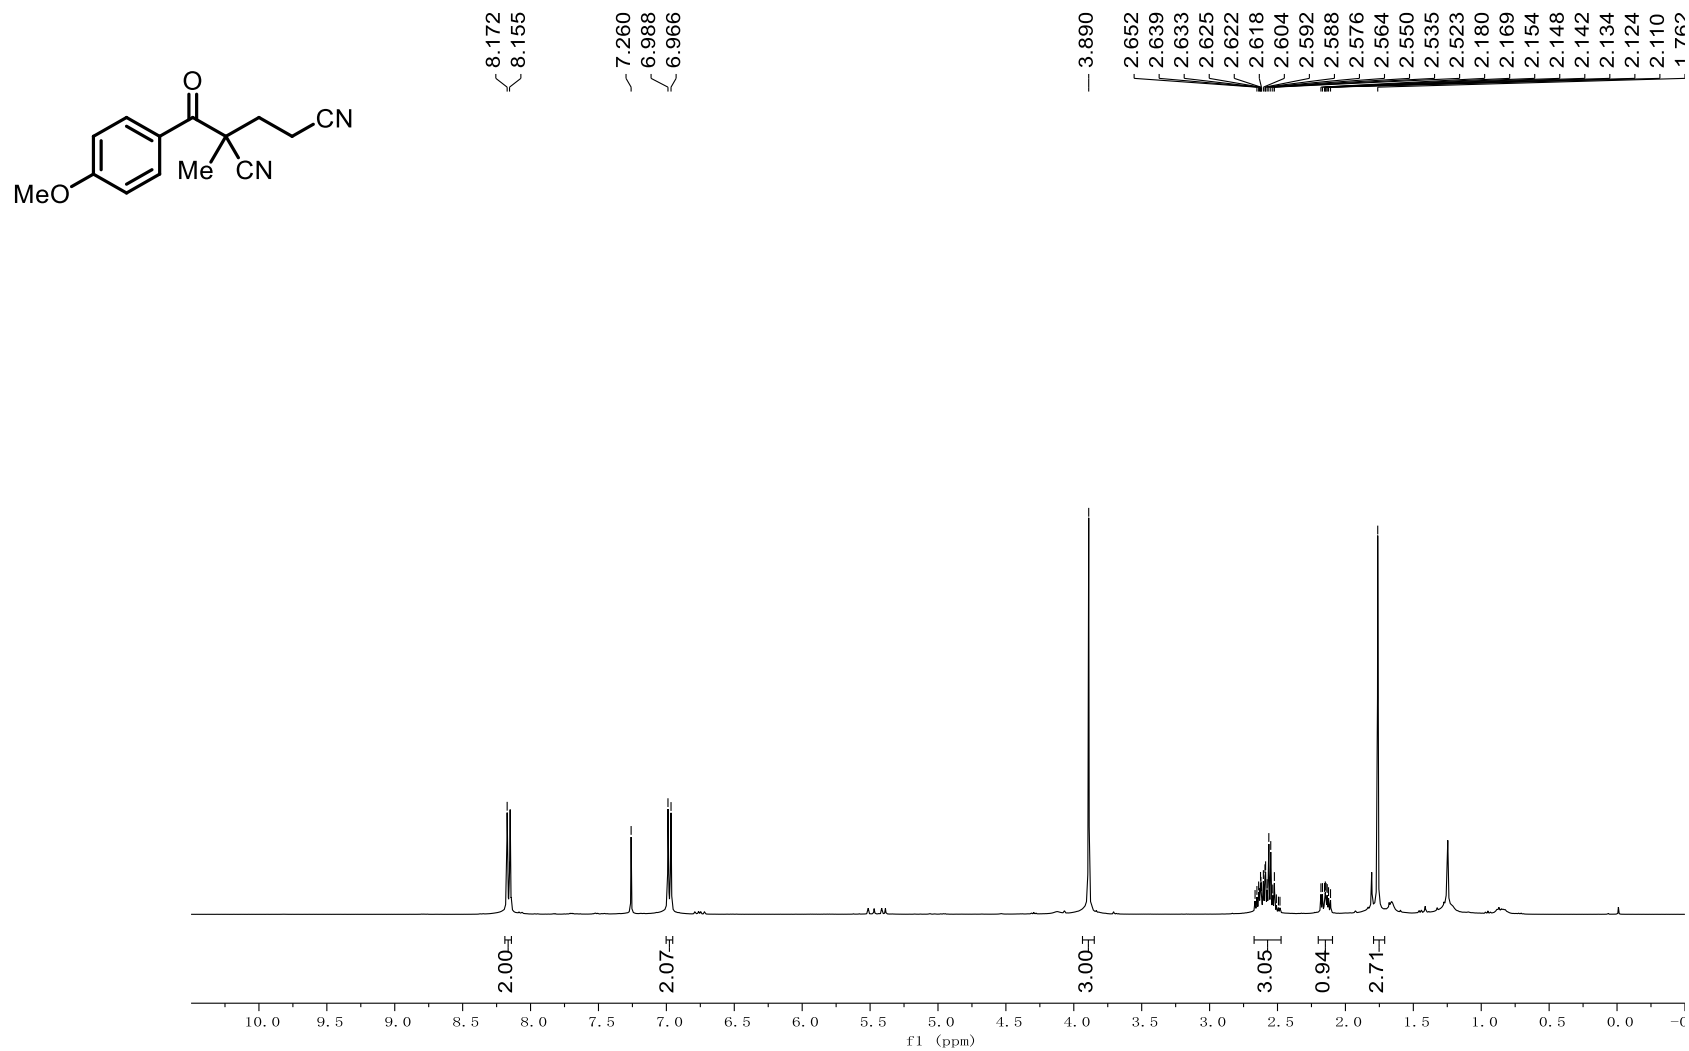

<sup>13</sup>C NMR (100 MHz, CDCl<sub>3</sub>) spectrum of 2-(4-Methoxybenzoyl)-2-methylpentanedinitrile (47)

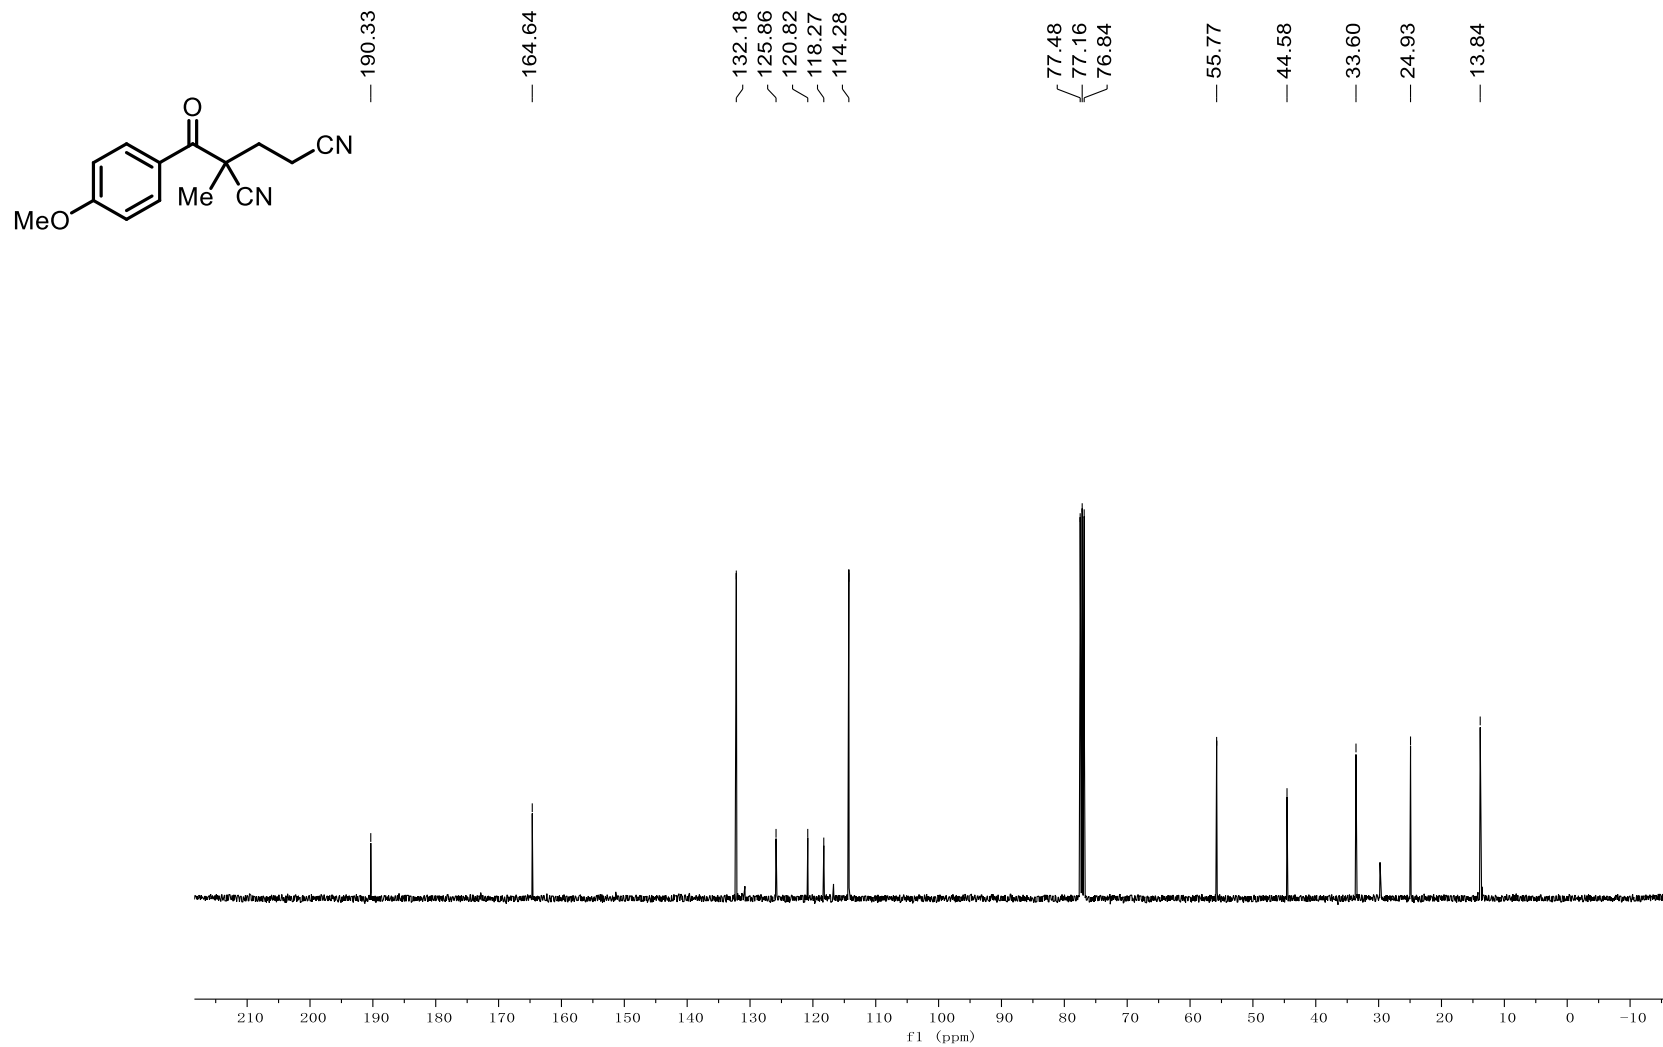

<sup>1</sup>H NMR (400 MHz, CDCl<sub>3</sub>) spectrum of 2-Methyl-2-(4-(methylthio)benzoyl)pentanedinitrile (48)

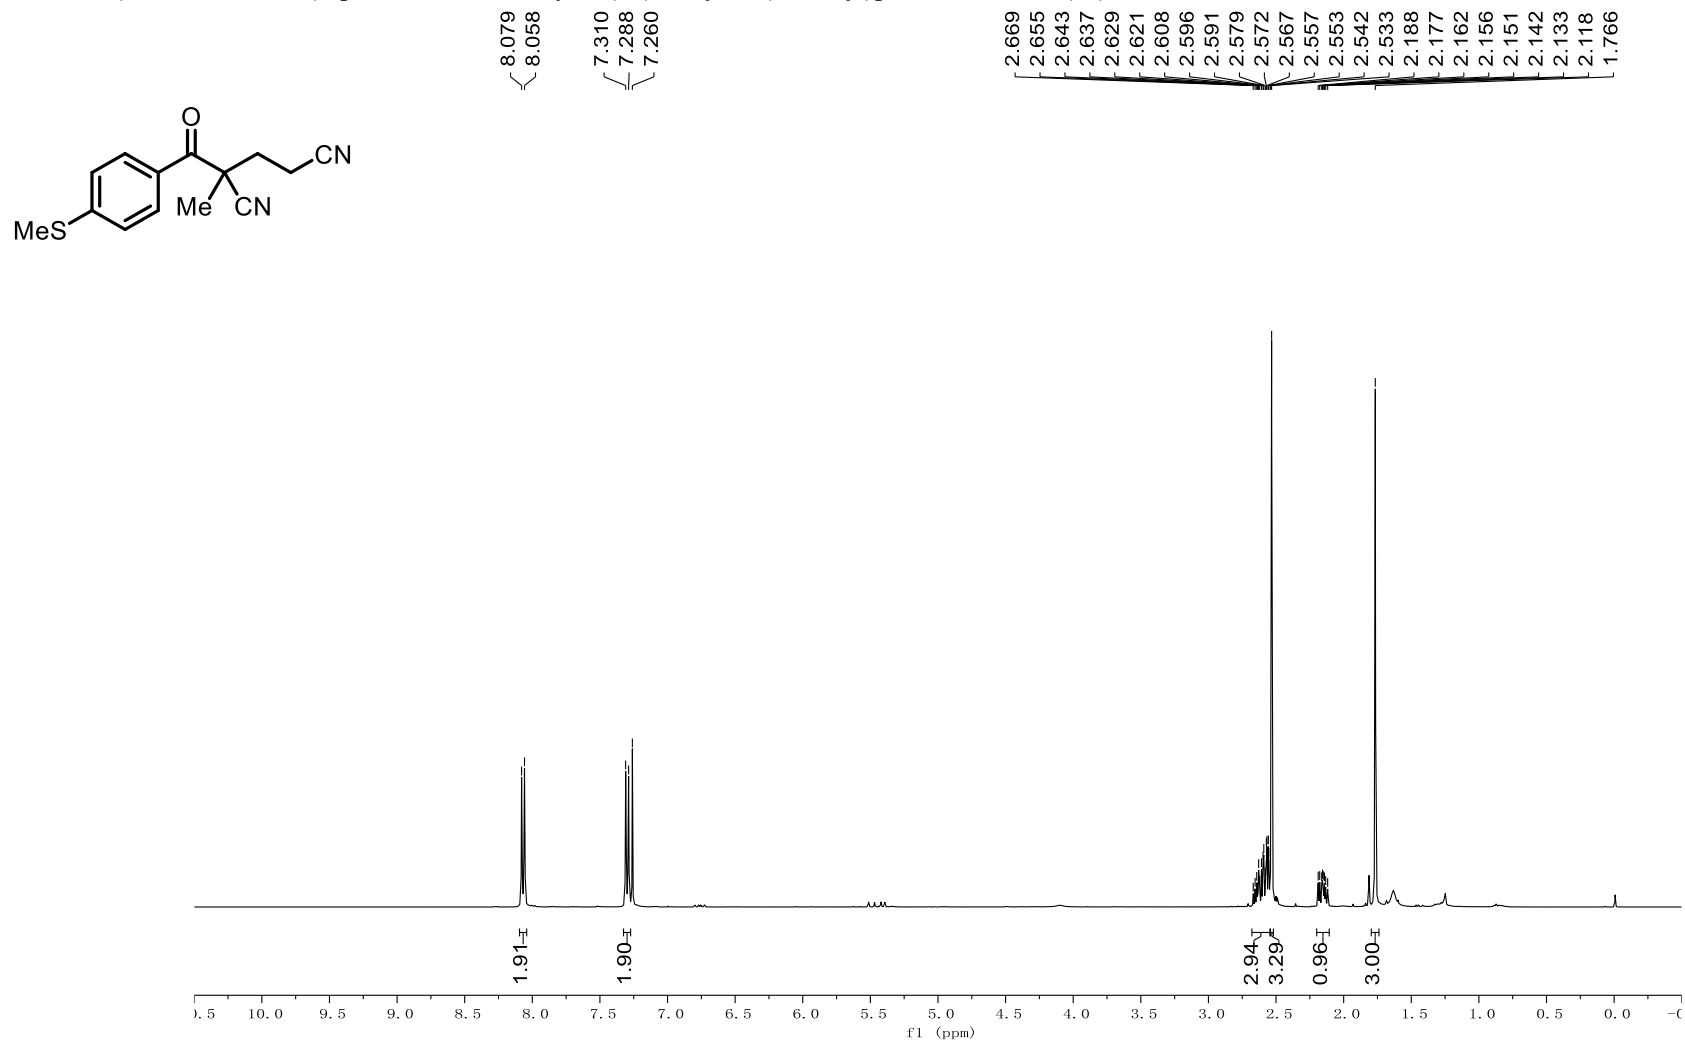

<sup>13</sup>C NMR (100 MHz, CDCl<sub>3</sub>) spectrum of 2-Methyl-2-(4-(methylthio)benzoyl)pentanedinitrile (48)

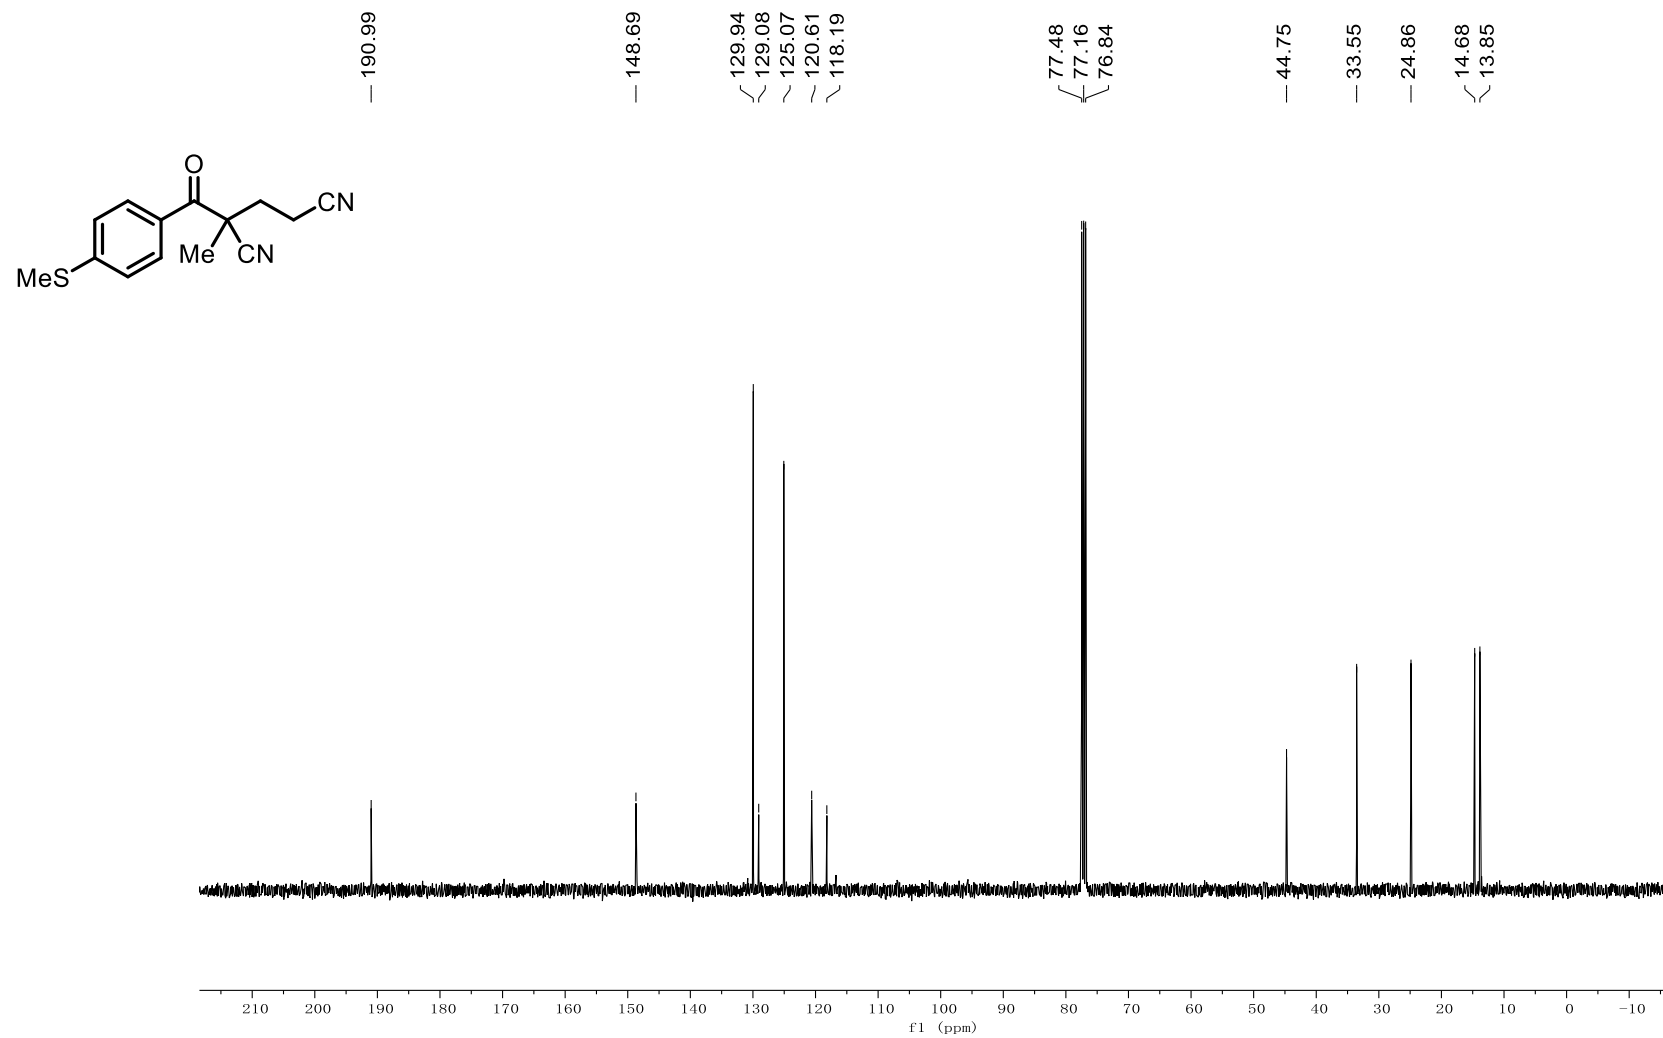

<sup>1</sup>H NMR (400 MHz, CDCl<sub>3</sub>) spectrum of 2-Methyl-2-(4-(trifluoromethoxy)benzoyl)pentanedinitrile (49)

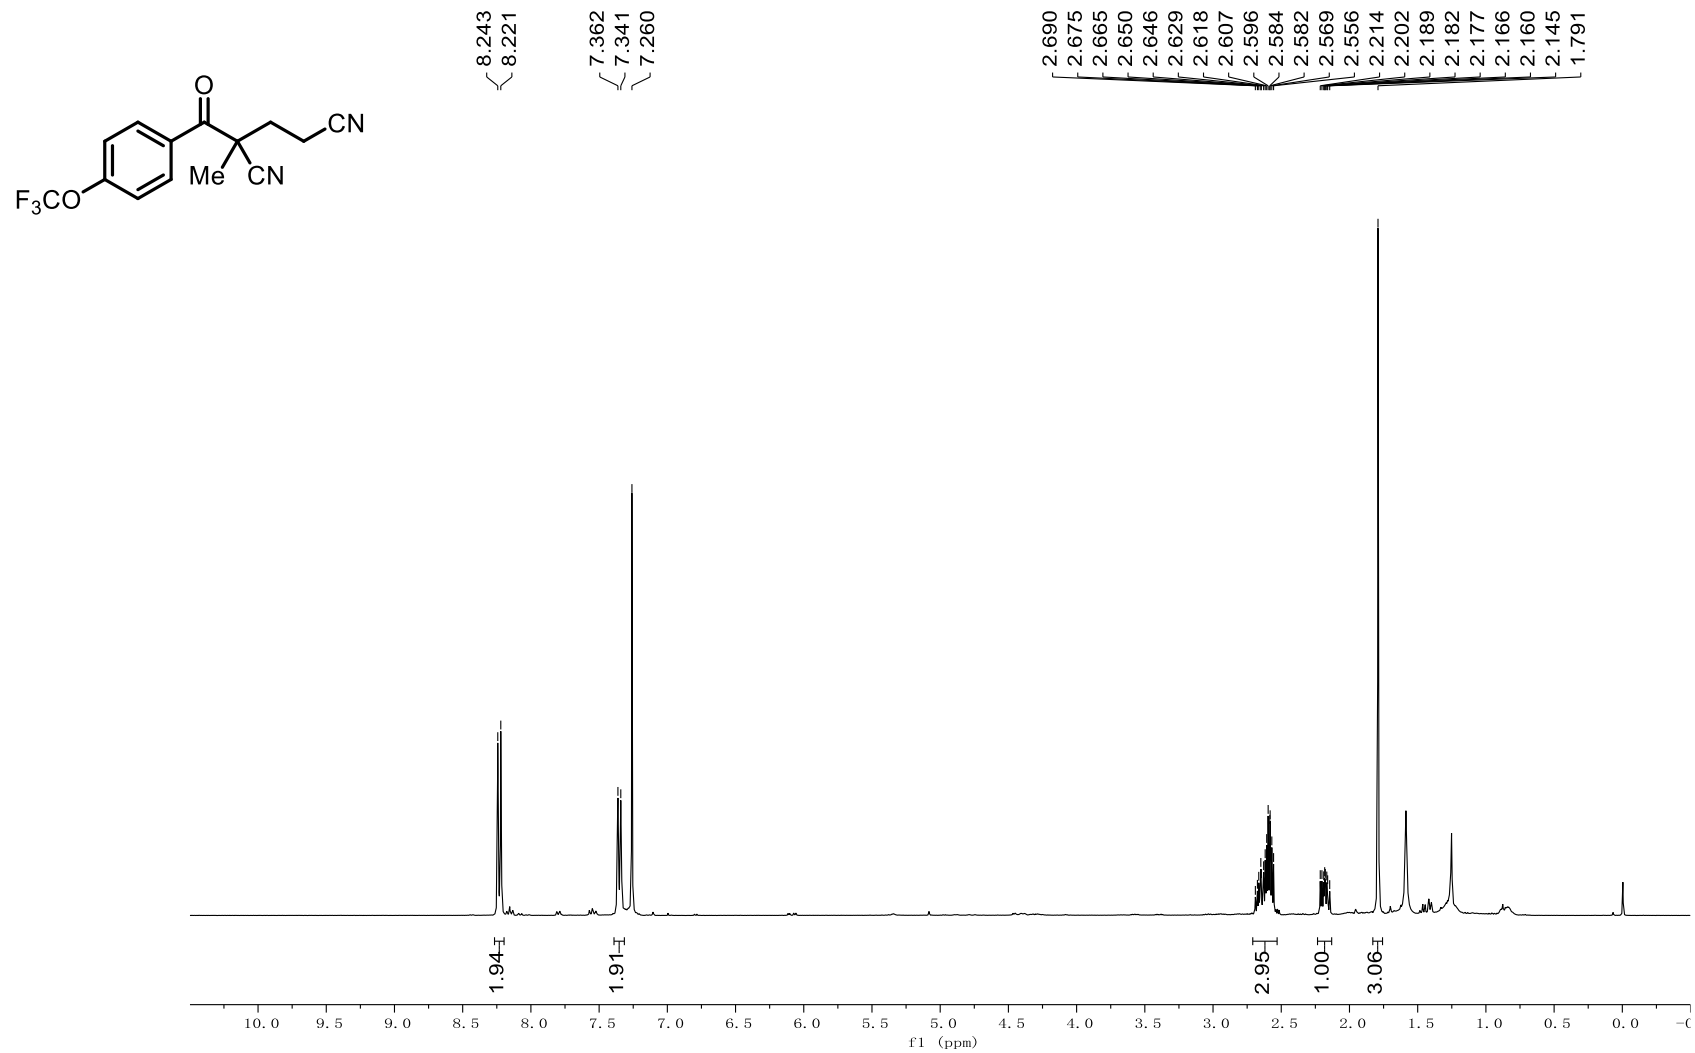

<sup>13</sup>C NMR (100 MHz, CDCl<sub>3</sub>) spectrum of 2-Methyl-2-(4-(trifluoromethoxy)benzoyl)pentanedinitrile (49)

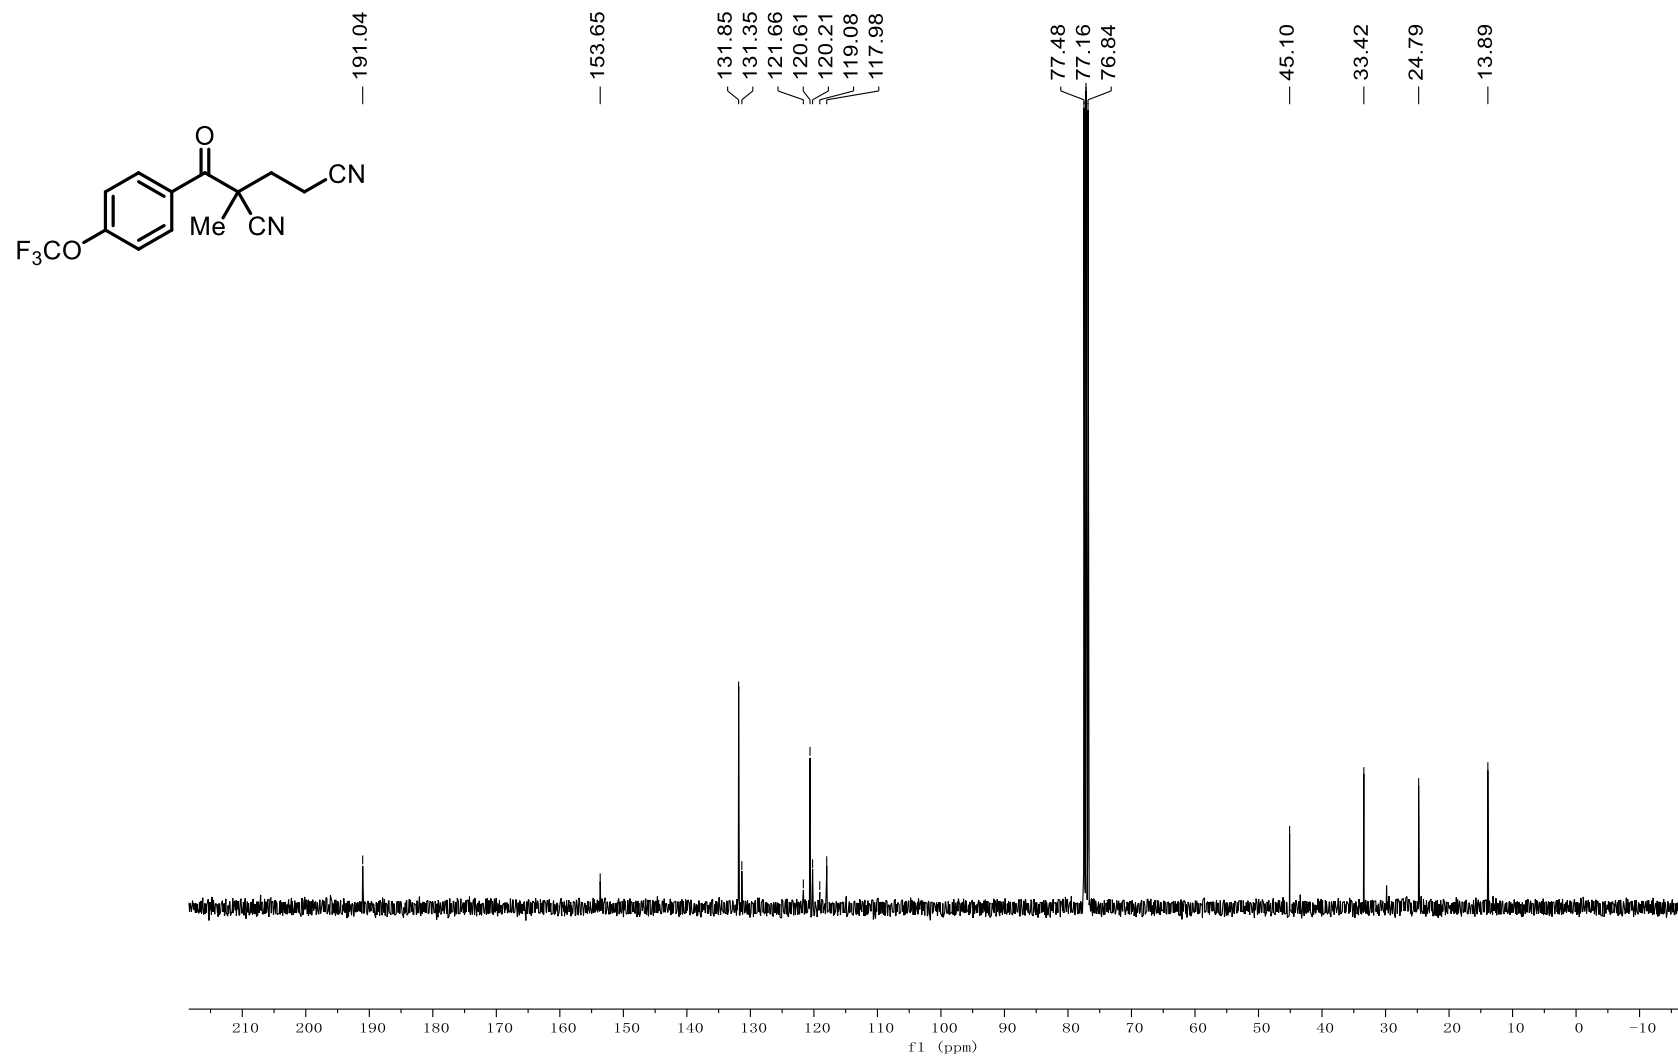

**$^{19}\text{F}$  NMR (376 MHz,  $\text{CDCl}_3$ ) spectrum of 2-Methyl-2-(4-(trifluoromethoxy)benzoyl)pentanedinitrile (49)**

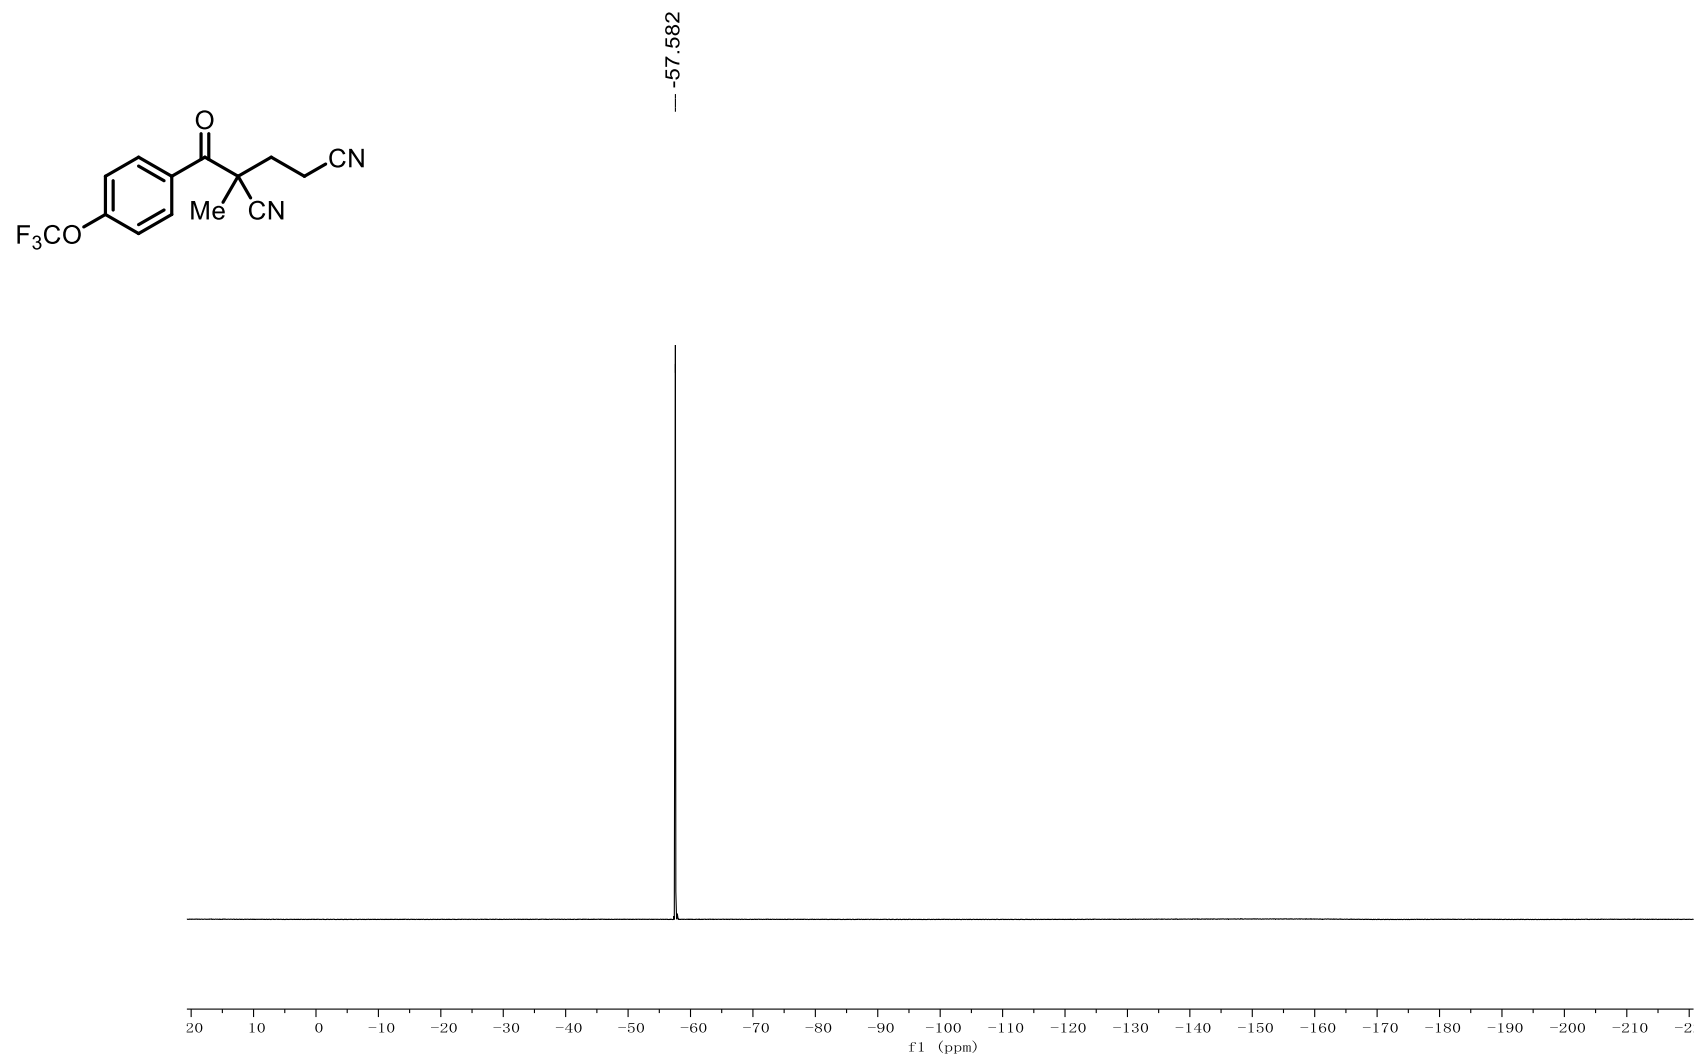

<sup>1</sup>H NMR (400 MHz, CDCl<sub>3</sub>) spectrum of 2-Methyl-2-(4-morpholinobenzoyl)pentanedinitrile (50)

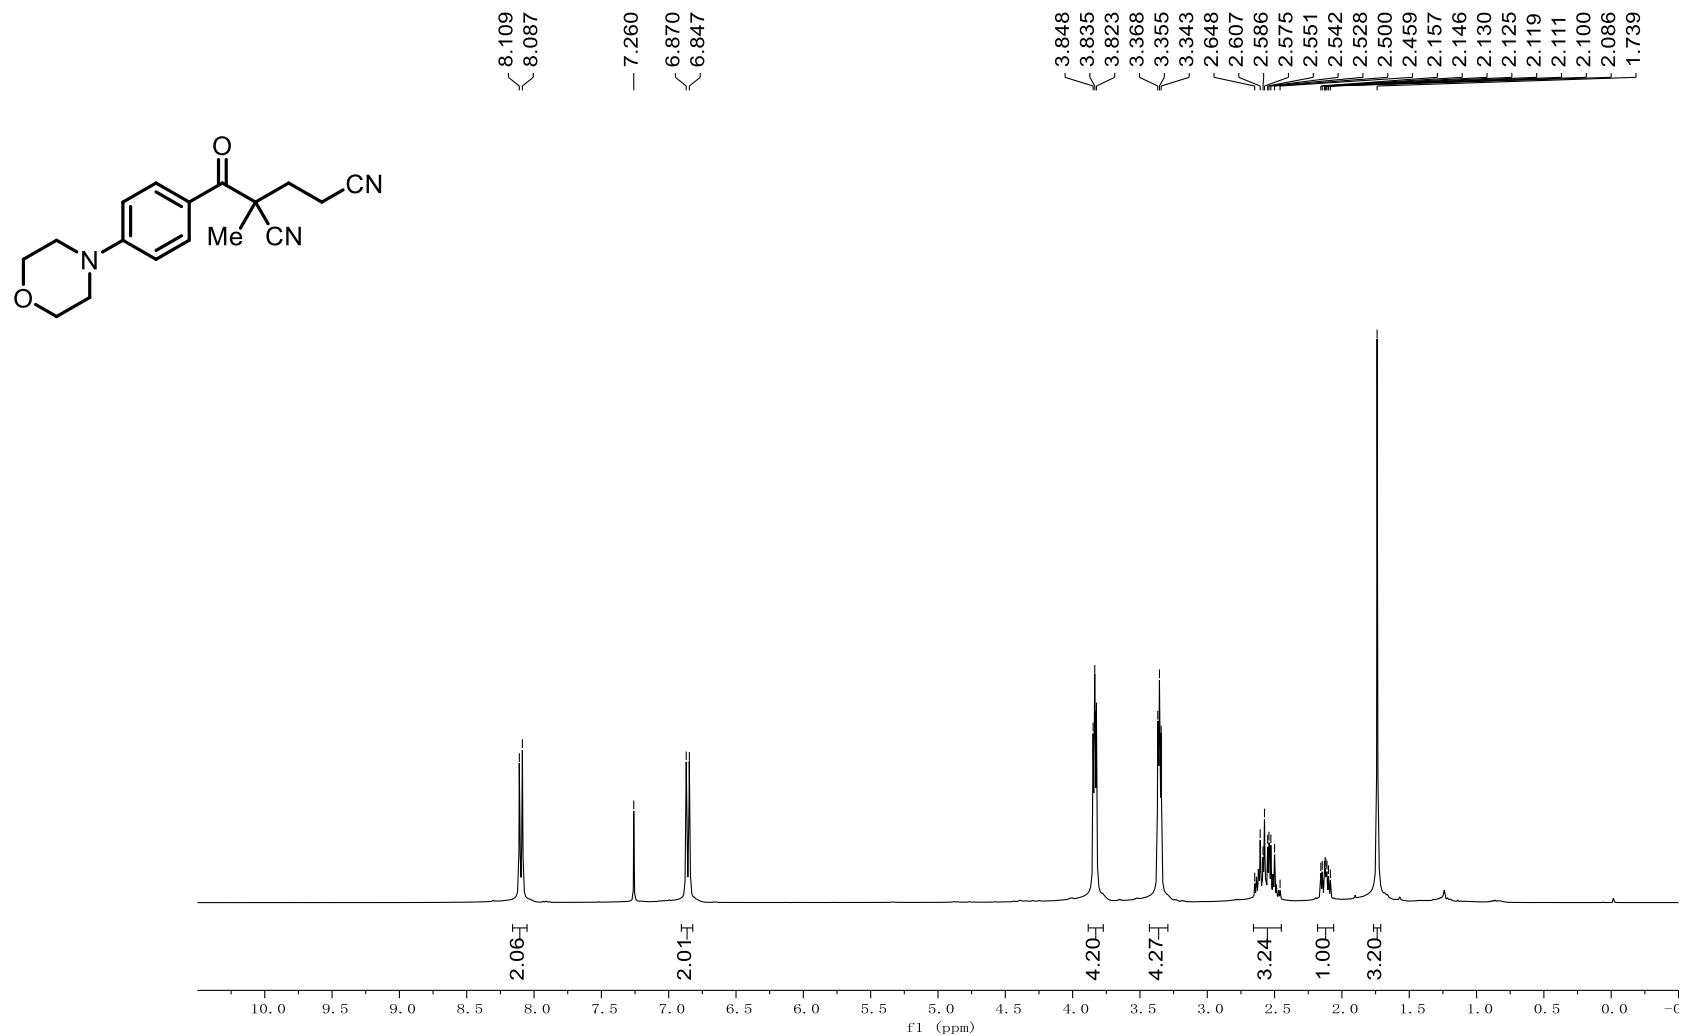

<sup>13</sup>C NMR (100 MHz, CDCl<sub>3</sub>) spectrum of 2-Methyl-2-(4-morpholinobenzoyl)pentanedinitrile (50)

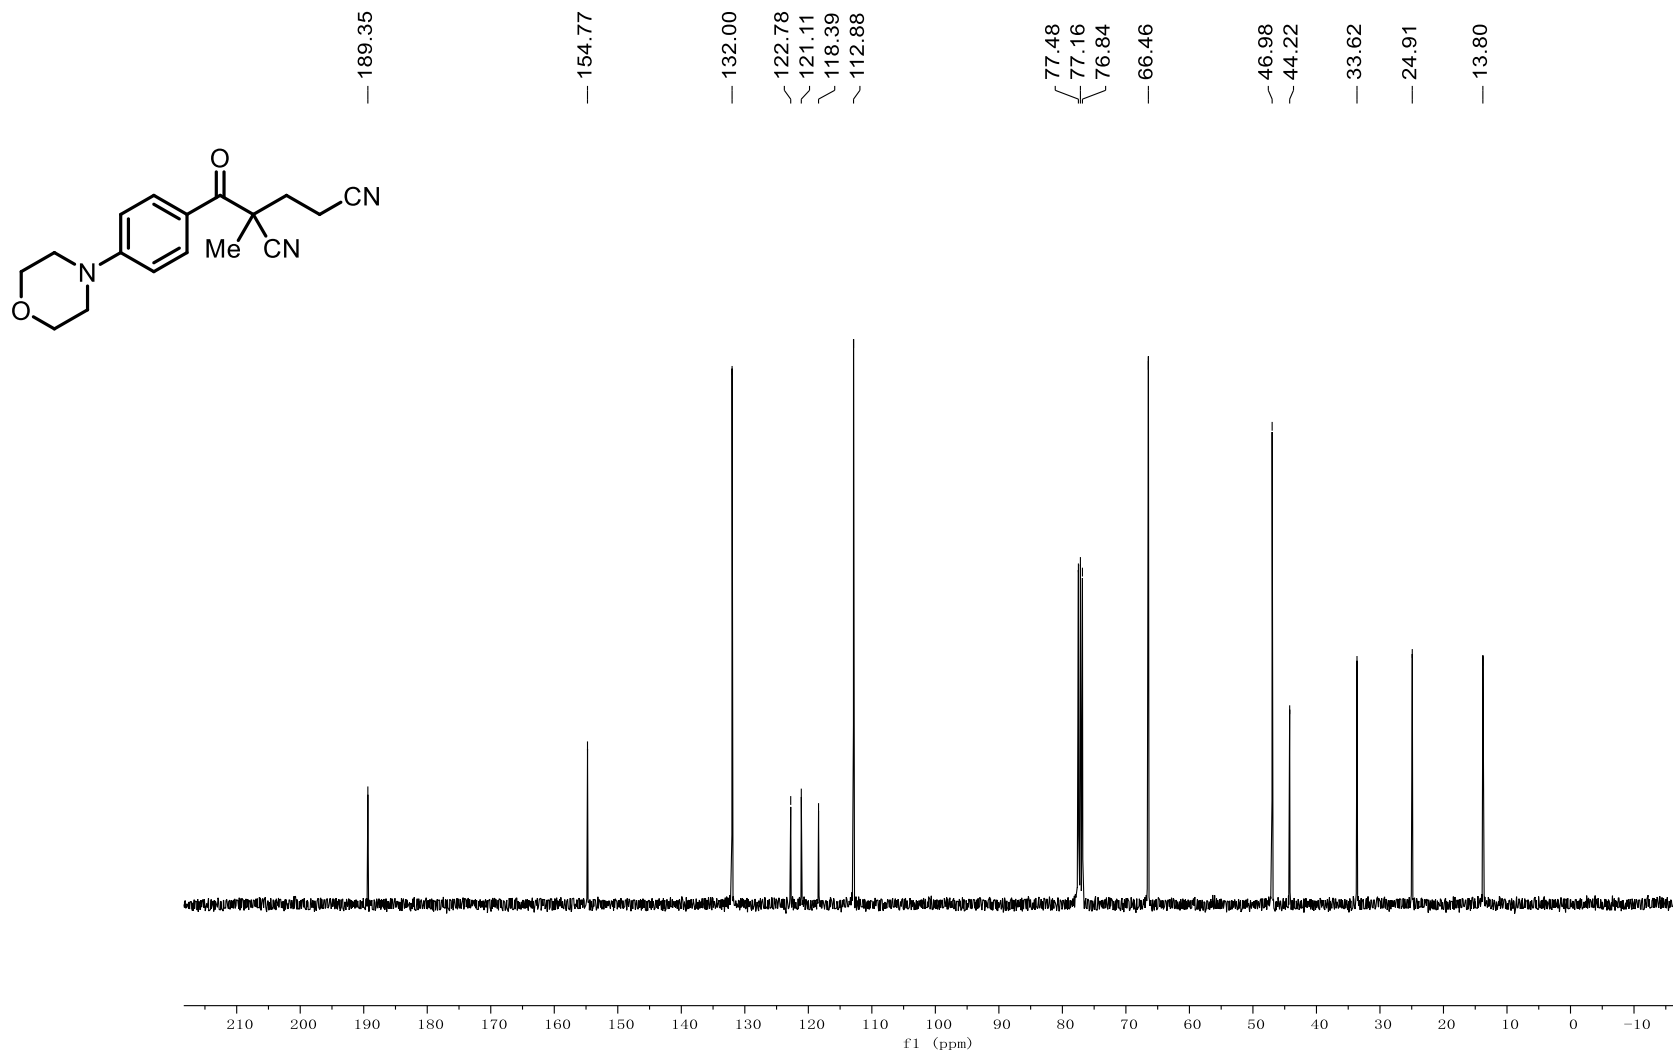

<sup>1</sup>H NMR (400 MHz, CDCl<sub>3</sub>) spectrum of 2-(3-Methoxybenzoyl)-2-methylpentanedinitrile (51)

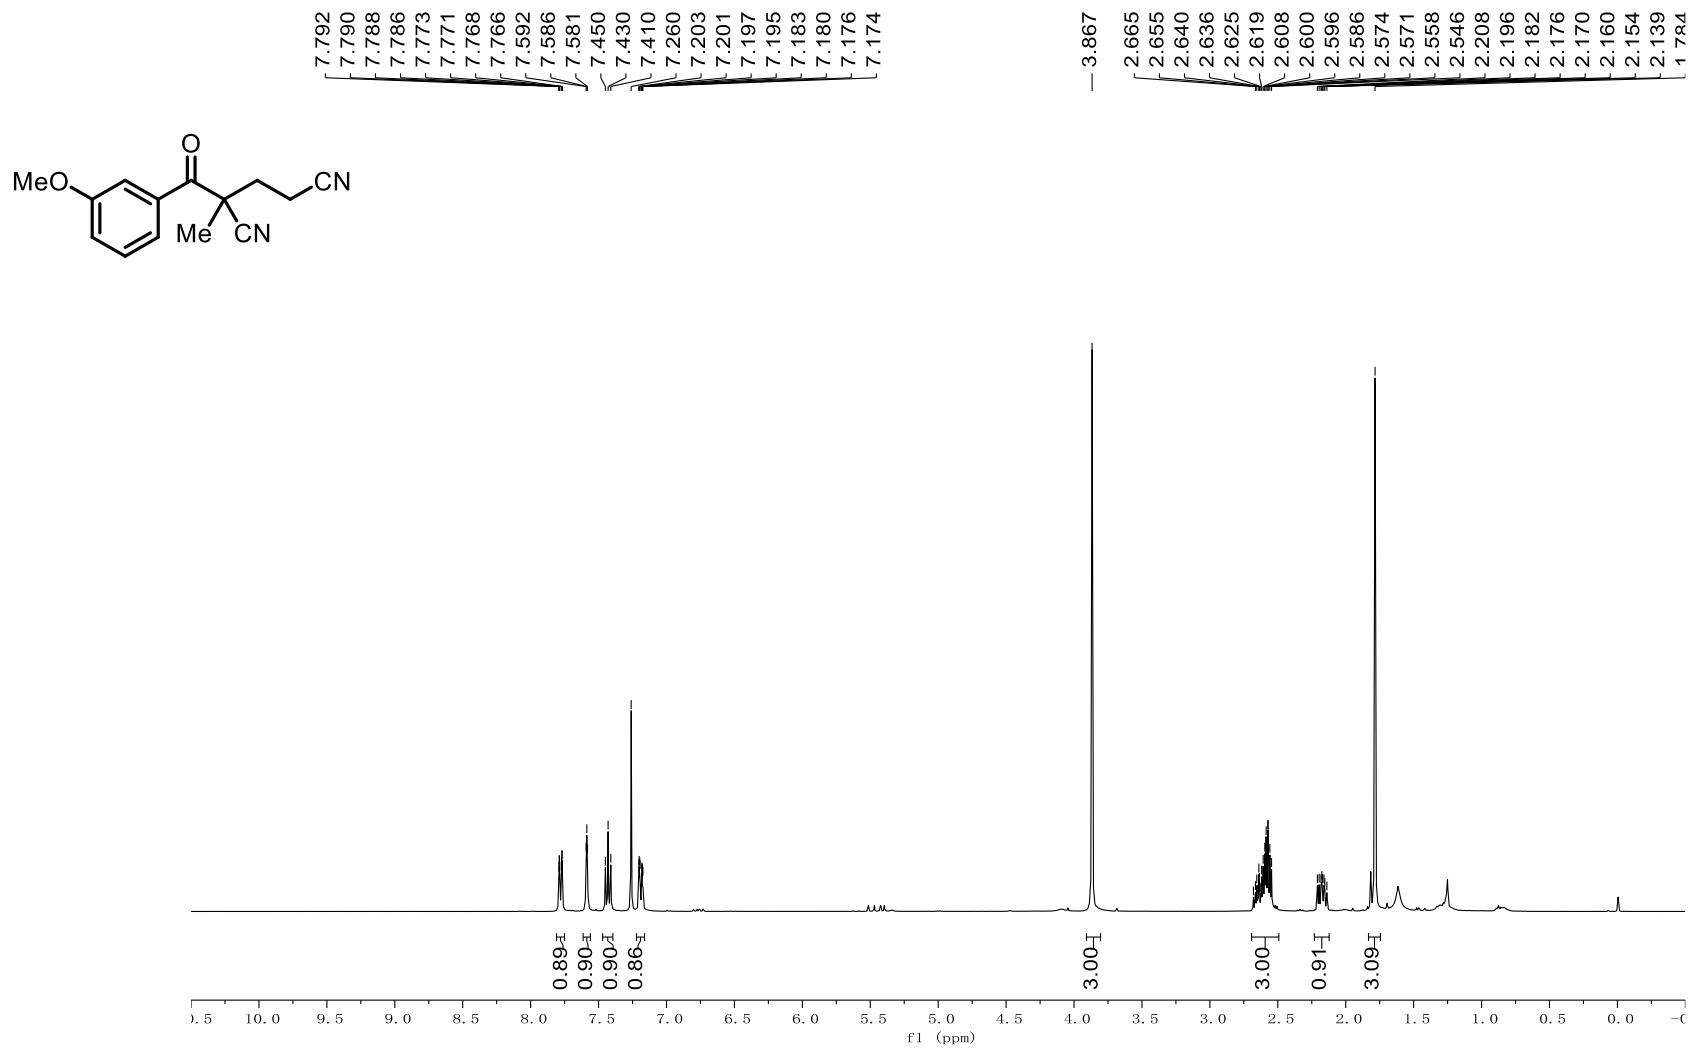

**<sup>13</sup>C NMR (100 MHz, CDCl<sub>3</sub>) spectrum of 2-(3-Methoxybenzoyl)-2-methylpentanedinitrile (51)**

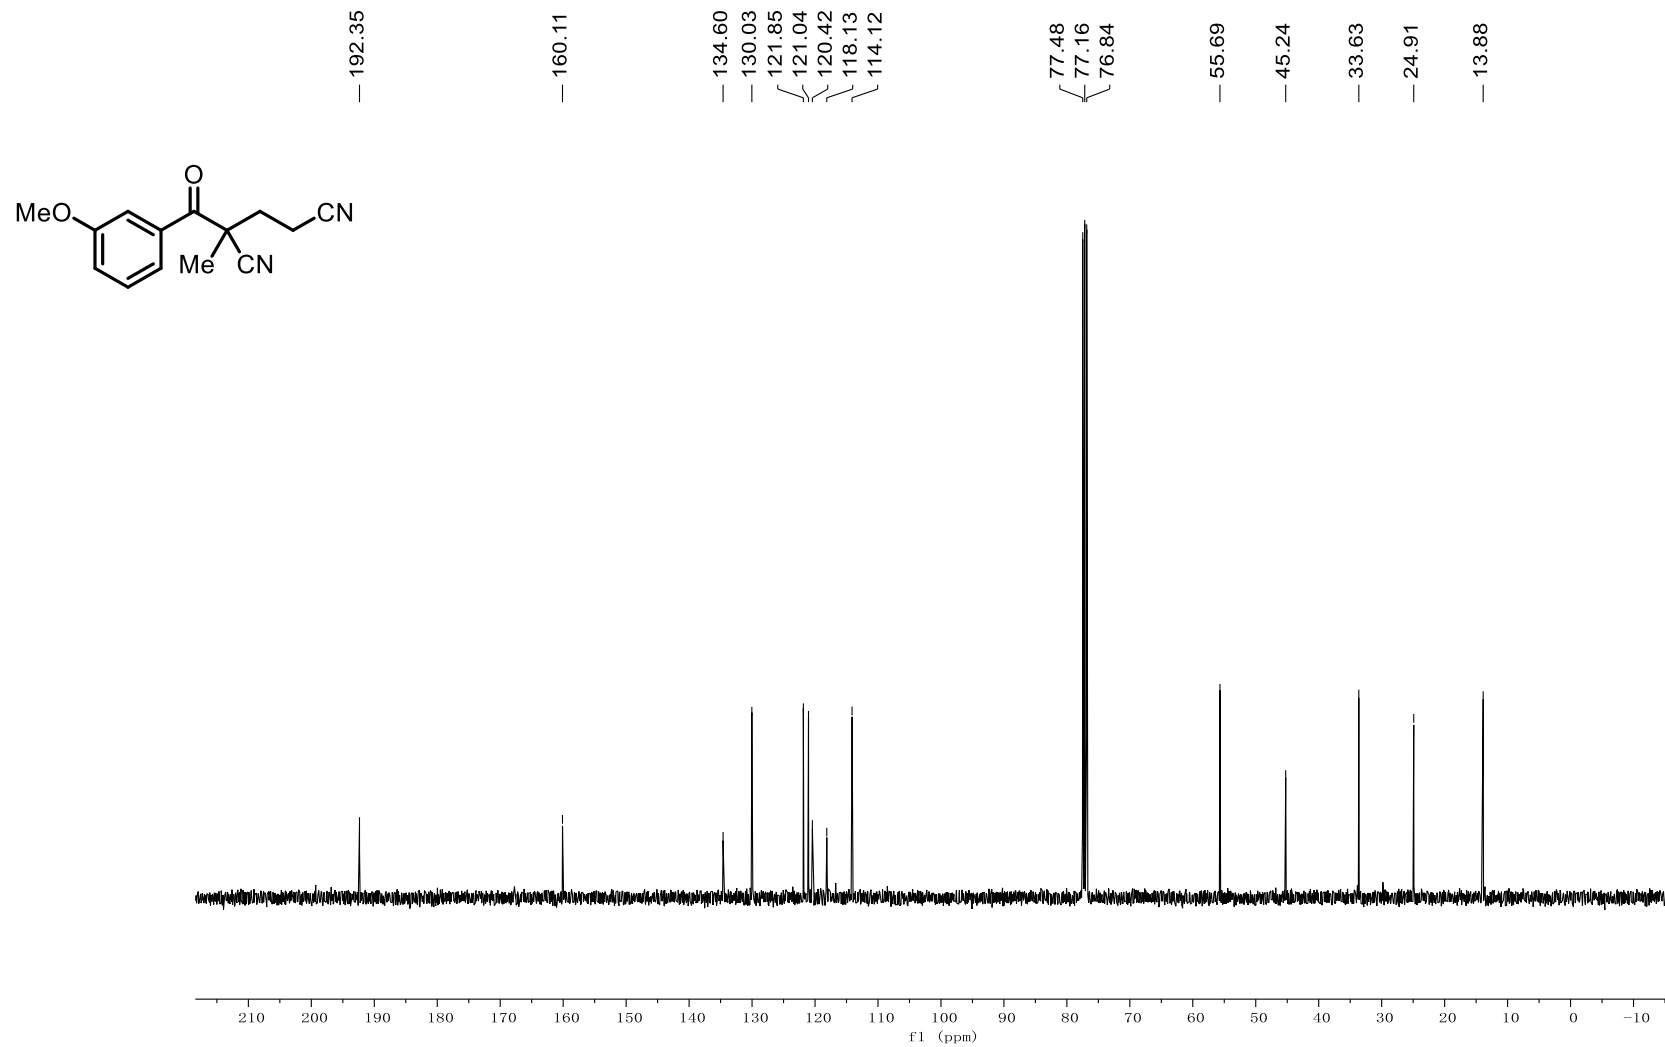

<sup>1</sup>H NMR (400 MHz, CDCl<sub>3</sub>) spectrum of 2-Methyl-2-(2-methylbenzoyl)pentanedinitrile (52)

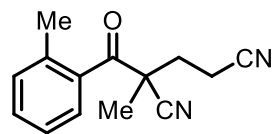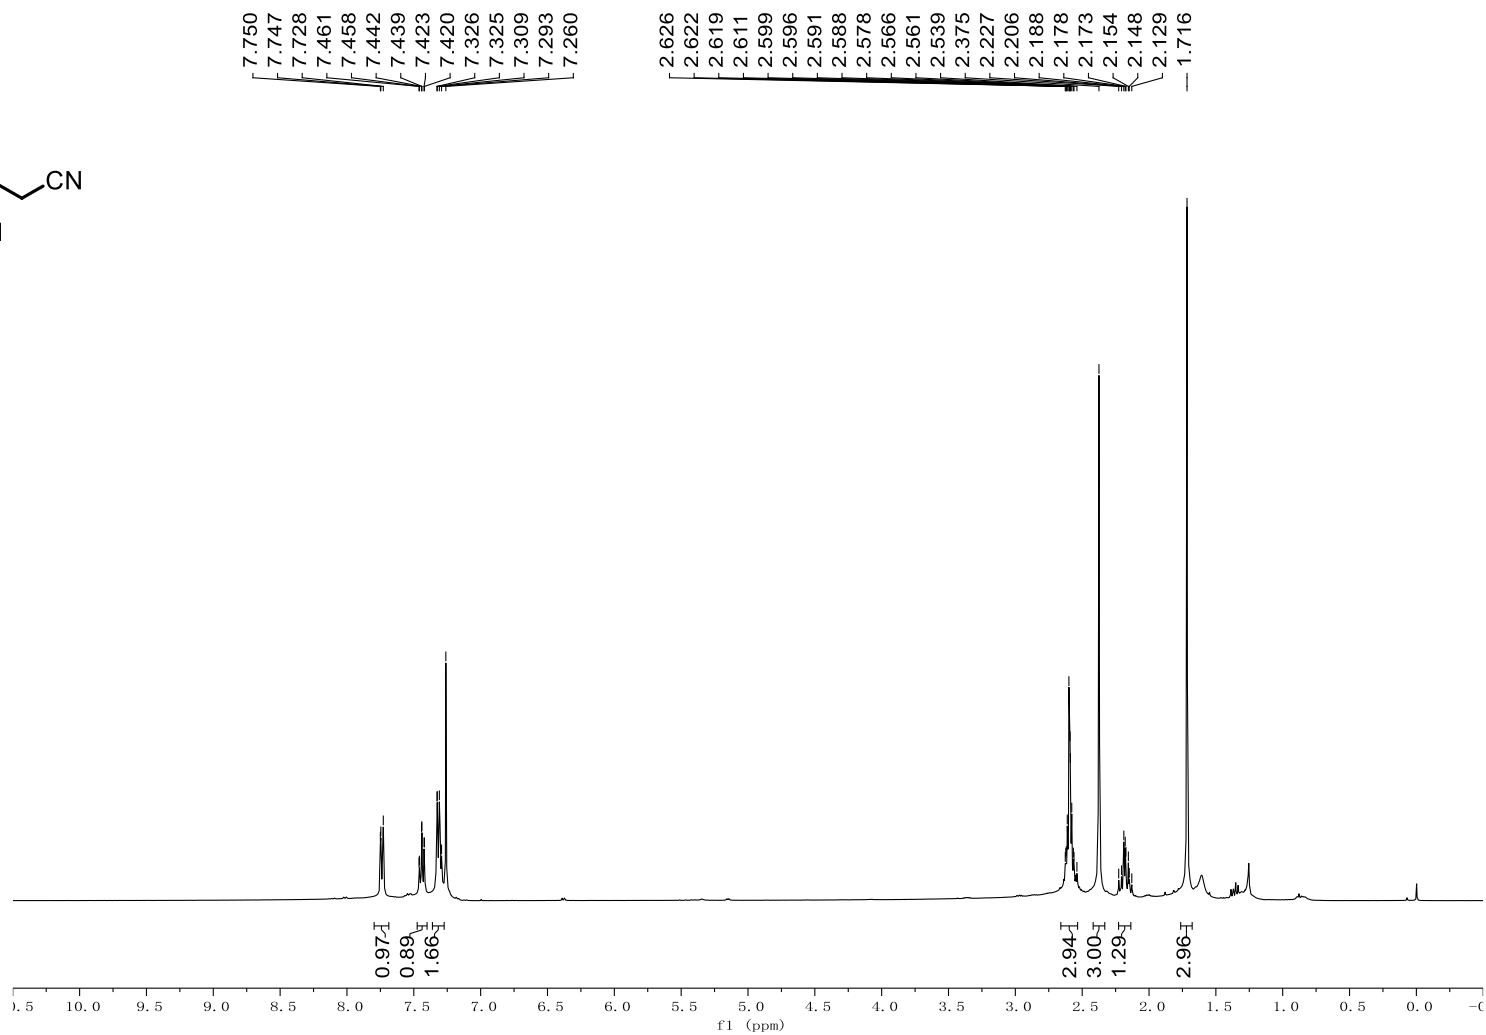

**$^{13}\text{C}$  NMR (100 MHz,  $\text{CDCl}_3$ ) spectrum of 2-Methyl-2-(2-methylbenzoyl)pentanedinitrile (52)**

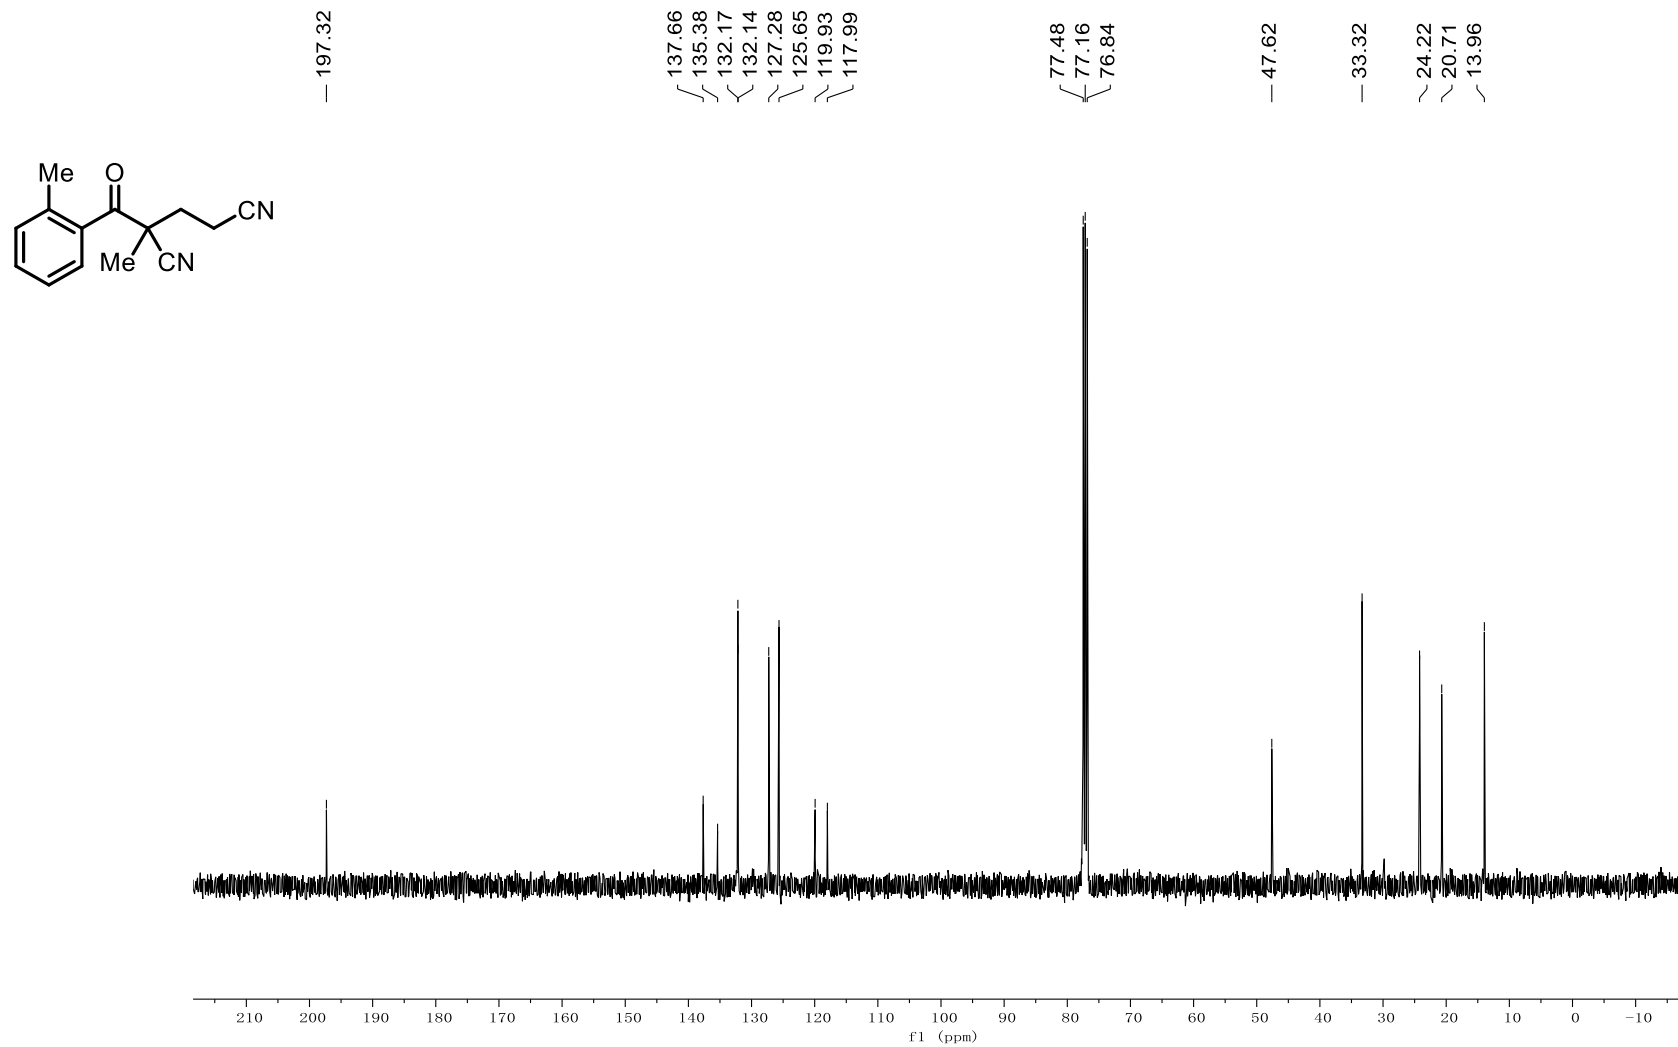

<sup>1</sup>H NMR (400 MHz, CDCl<sub>3</sub>) spectrum of 2-(Benzo[d][1,3]dioxole-5-carbonyl)-2-methylpentanedinitrile (53)

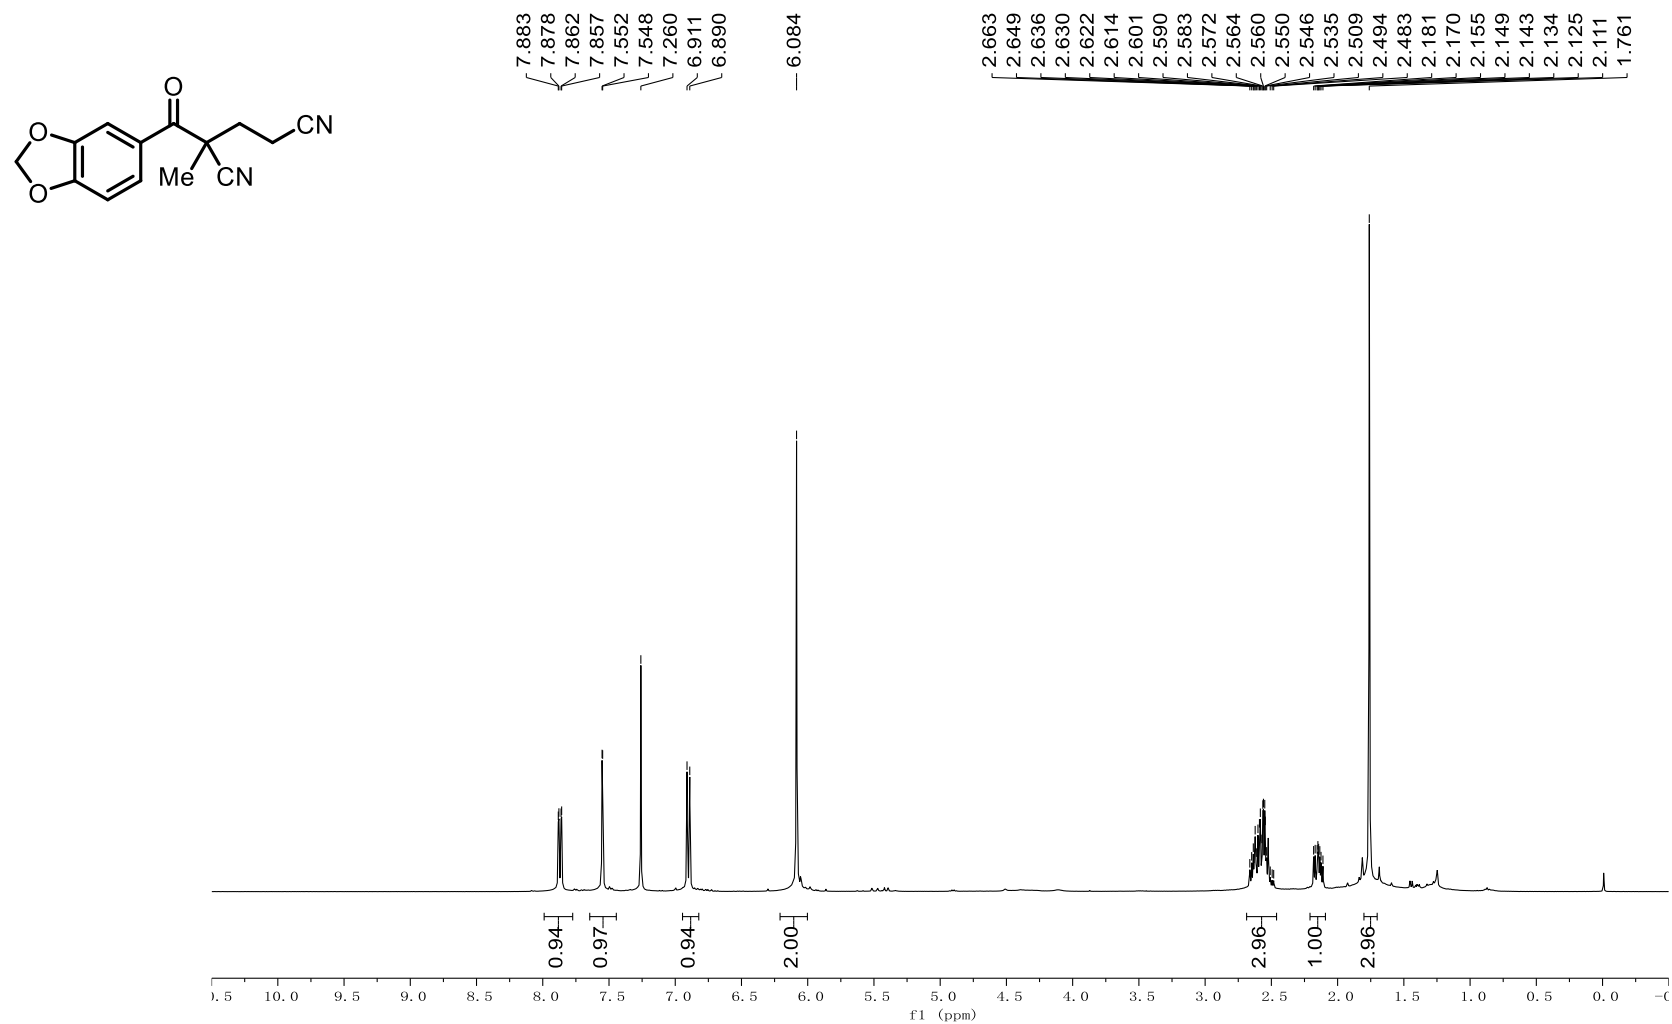

<sup>13</sup>C NMR (100 MHz, CDCl<sub>3</sub>) spectrum of 2-(Benzo[d][1,3]dioxole-5-carbonyl)-2-methylpentanedinitrile (53)

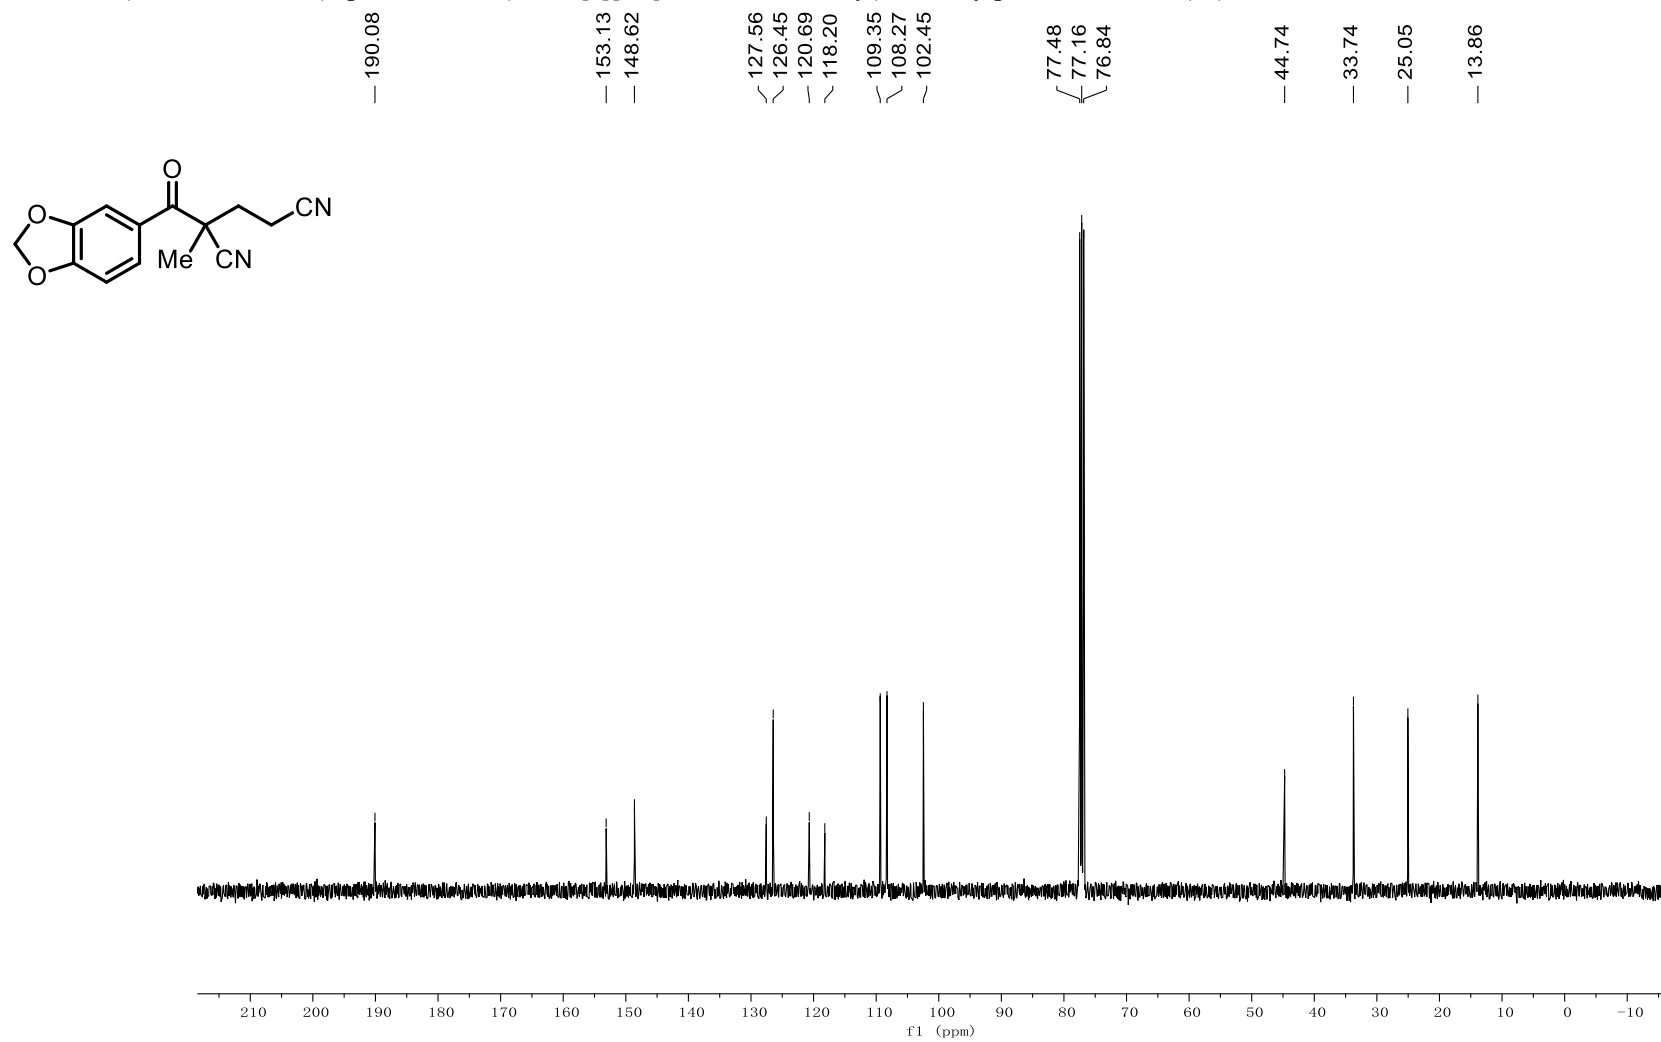

<sup>1</sup>H NMR (400 MHz, CDCl<sub>3</sub>) spectrum of 2-Methyl-2-(4-(trifluoromethoxy)benzoyl)pentanedinitrile (54)

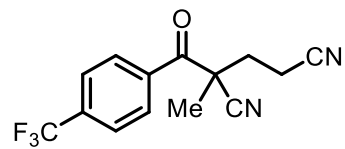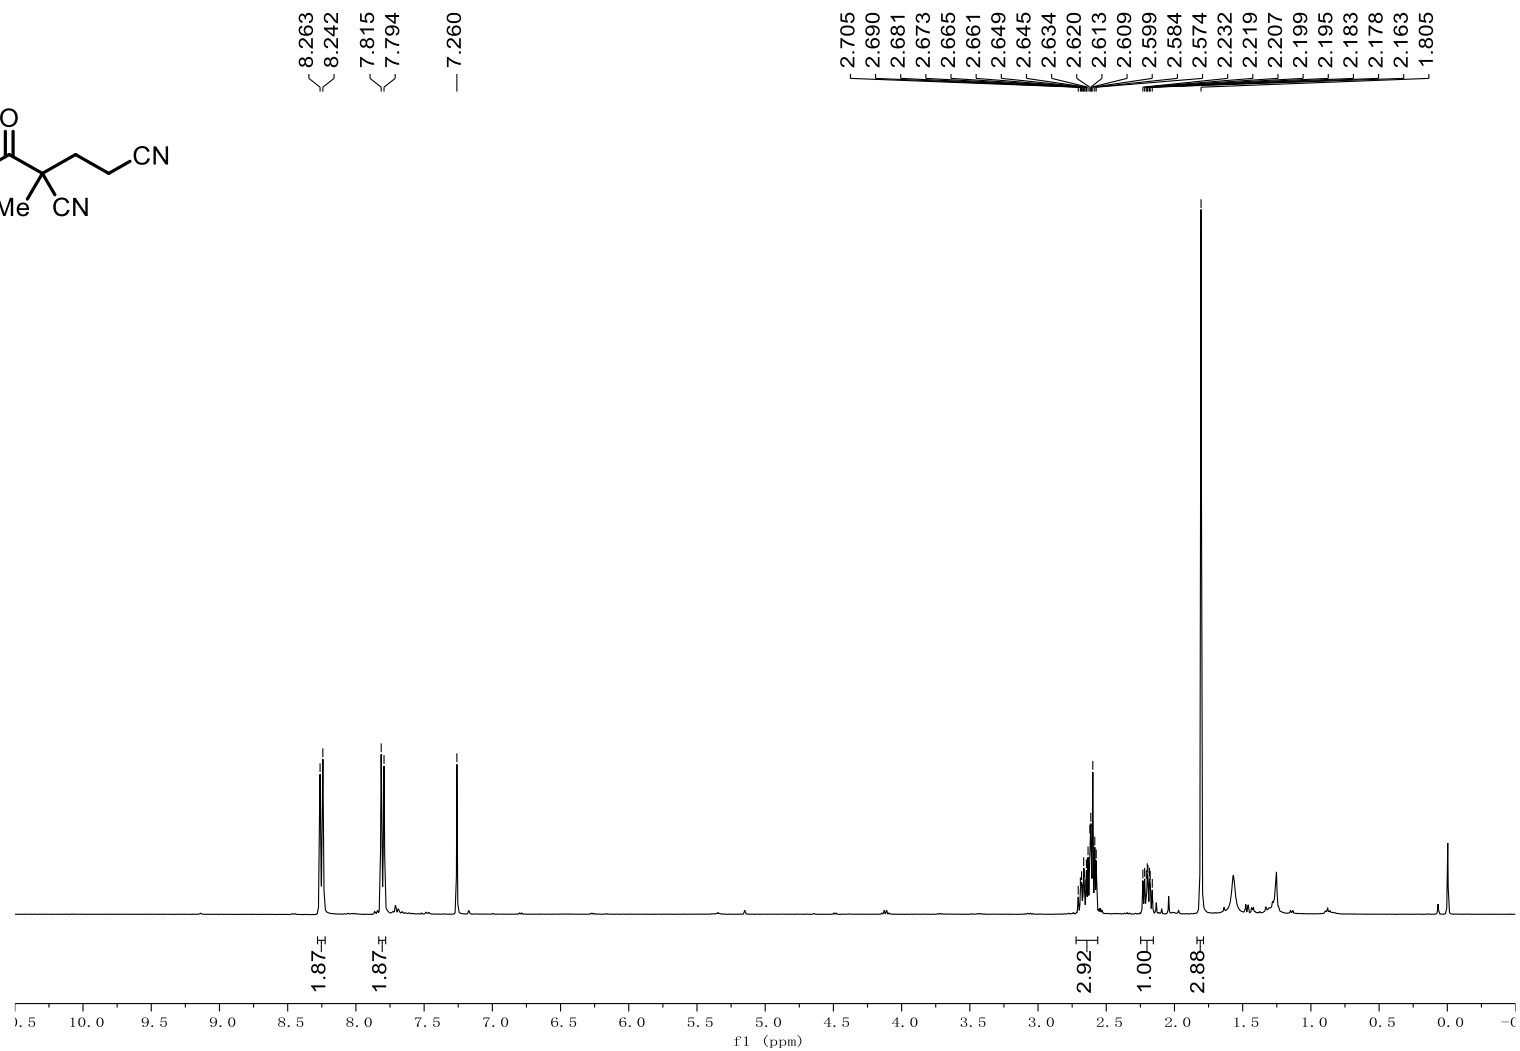

<sup>13</sup>C NMR (100 MHz, CDCl<sub>3</sub>) spectrum of 2-Methyl-2-(4-(trifluoromethoxy)benzoyl)pentanedinitrile (54)

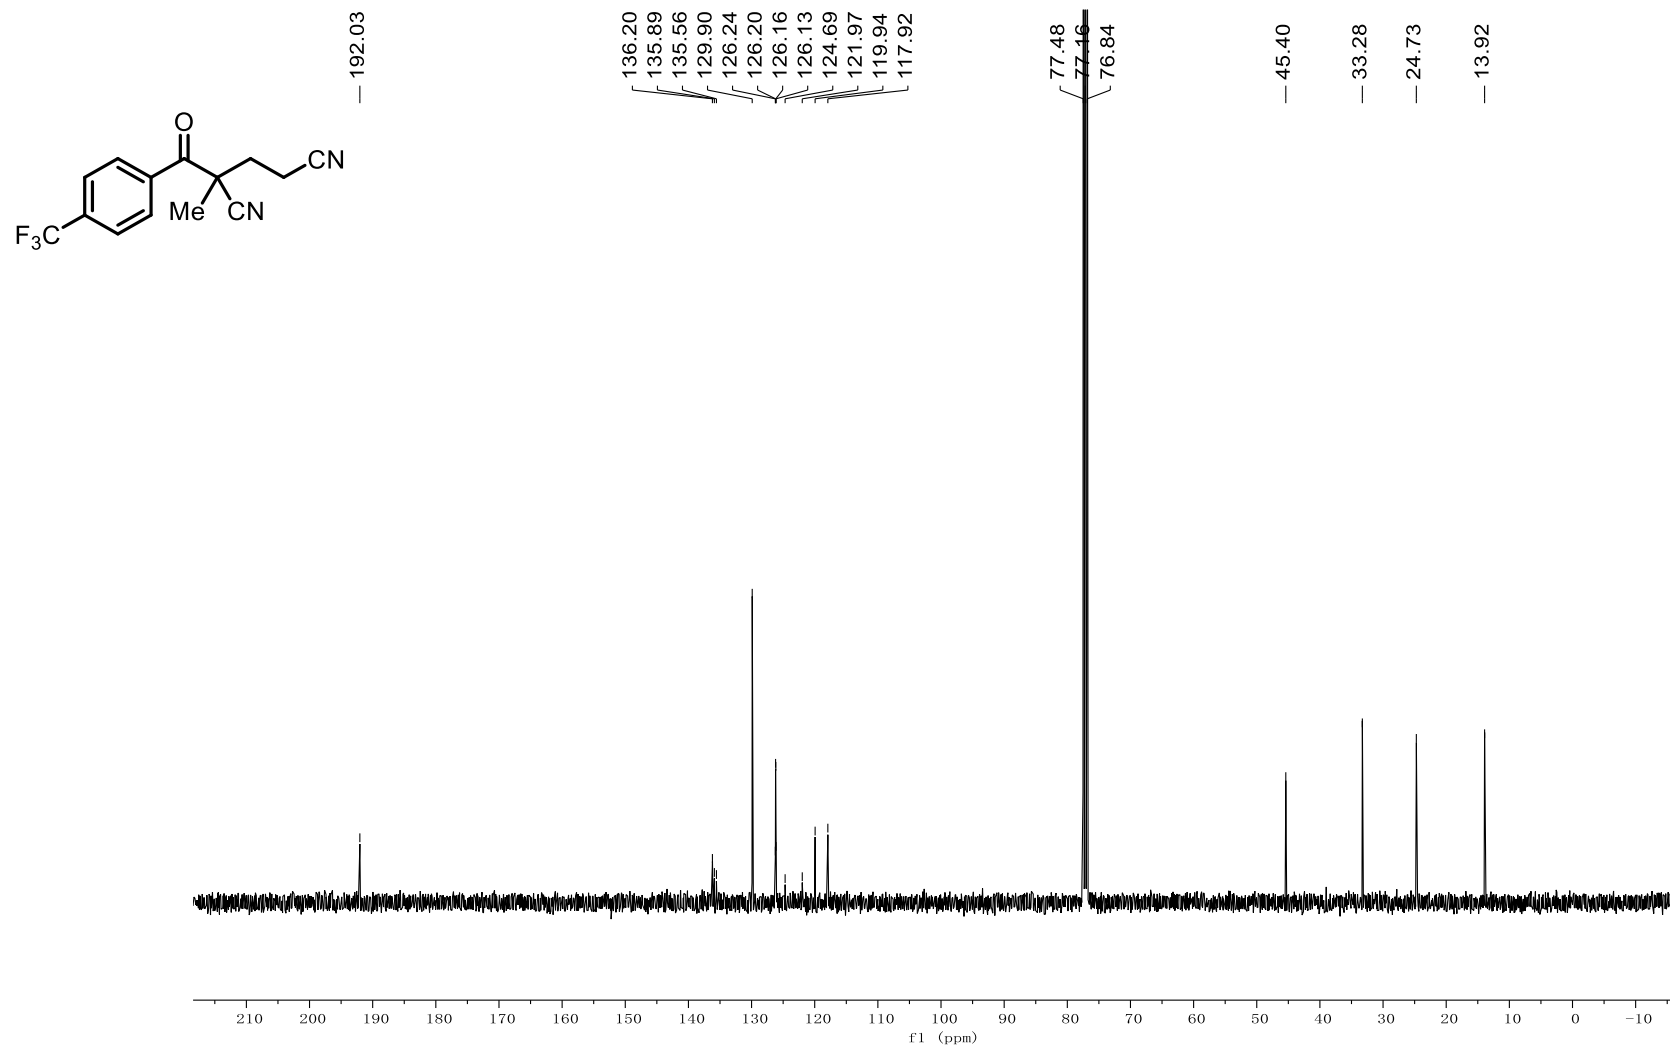

**<sup>19</sup>F NMR (376 MHz, CDCl<sub>3</sub>) spectrum of 2-Methyl-2-(4-(trifluoromethoxy)benzoyl)pentanedinitrile (54)**

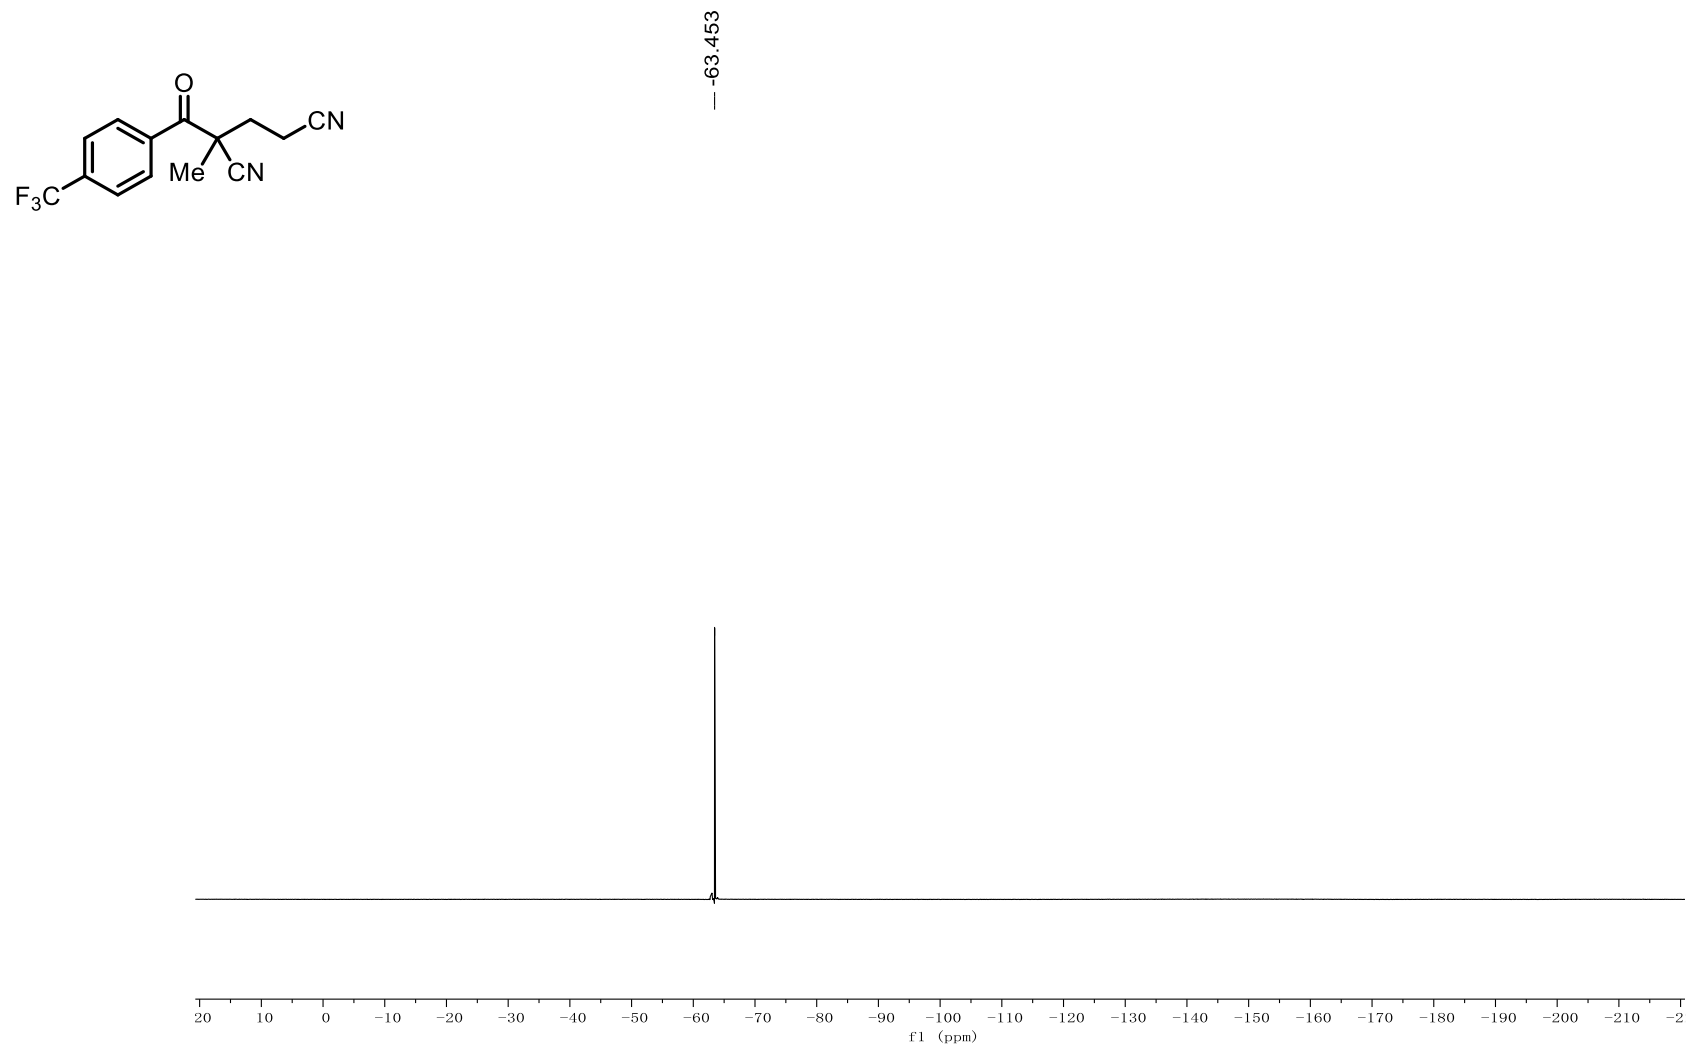

<sup>1</sup>H NMR (400 MHz, CDCl<sub>3</sub>) spectrum of 2-(4-Fluorobenzoyl)-2-methylpentanedinitrile (55)

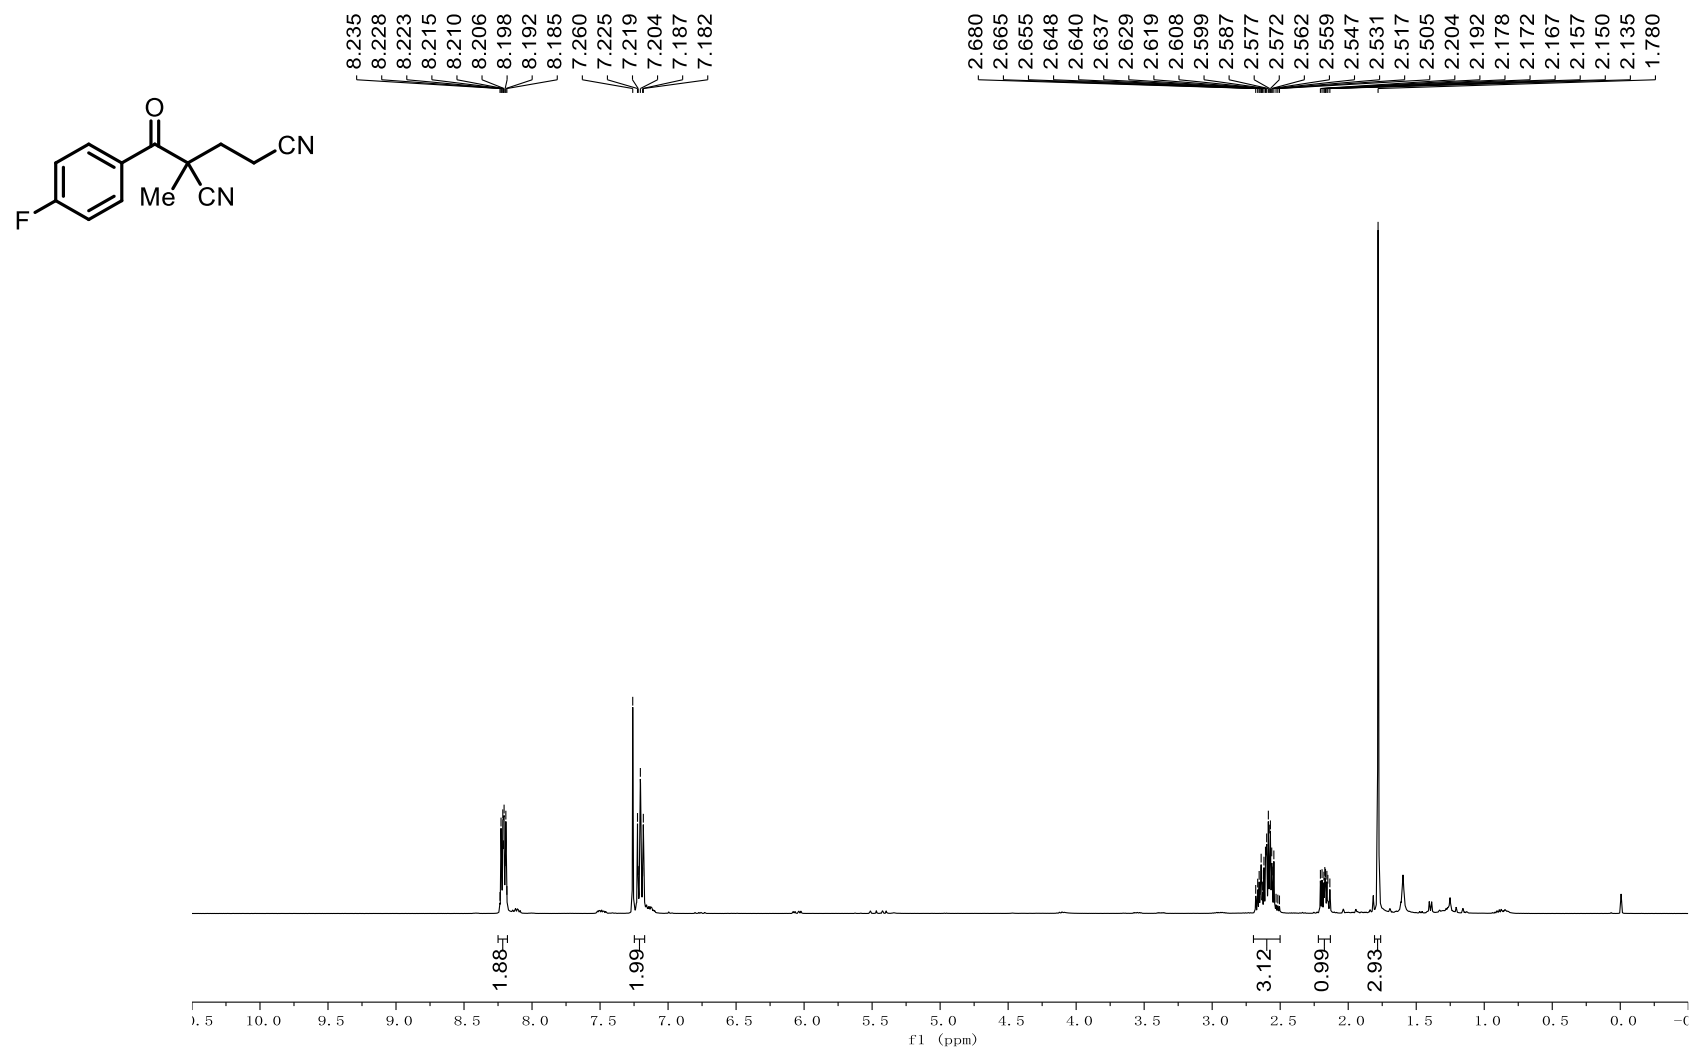

<sup>13</sup>C NMR (100 MHz, CDCl<sub>3</sub>) spectrum of 2-(4-Fluorobenzoyl)-2-methylpentanedinitrile (55)

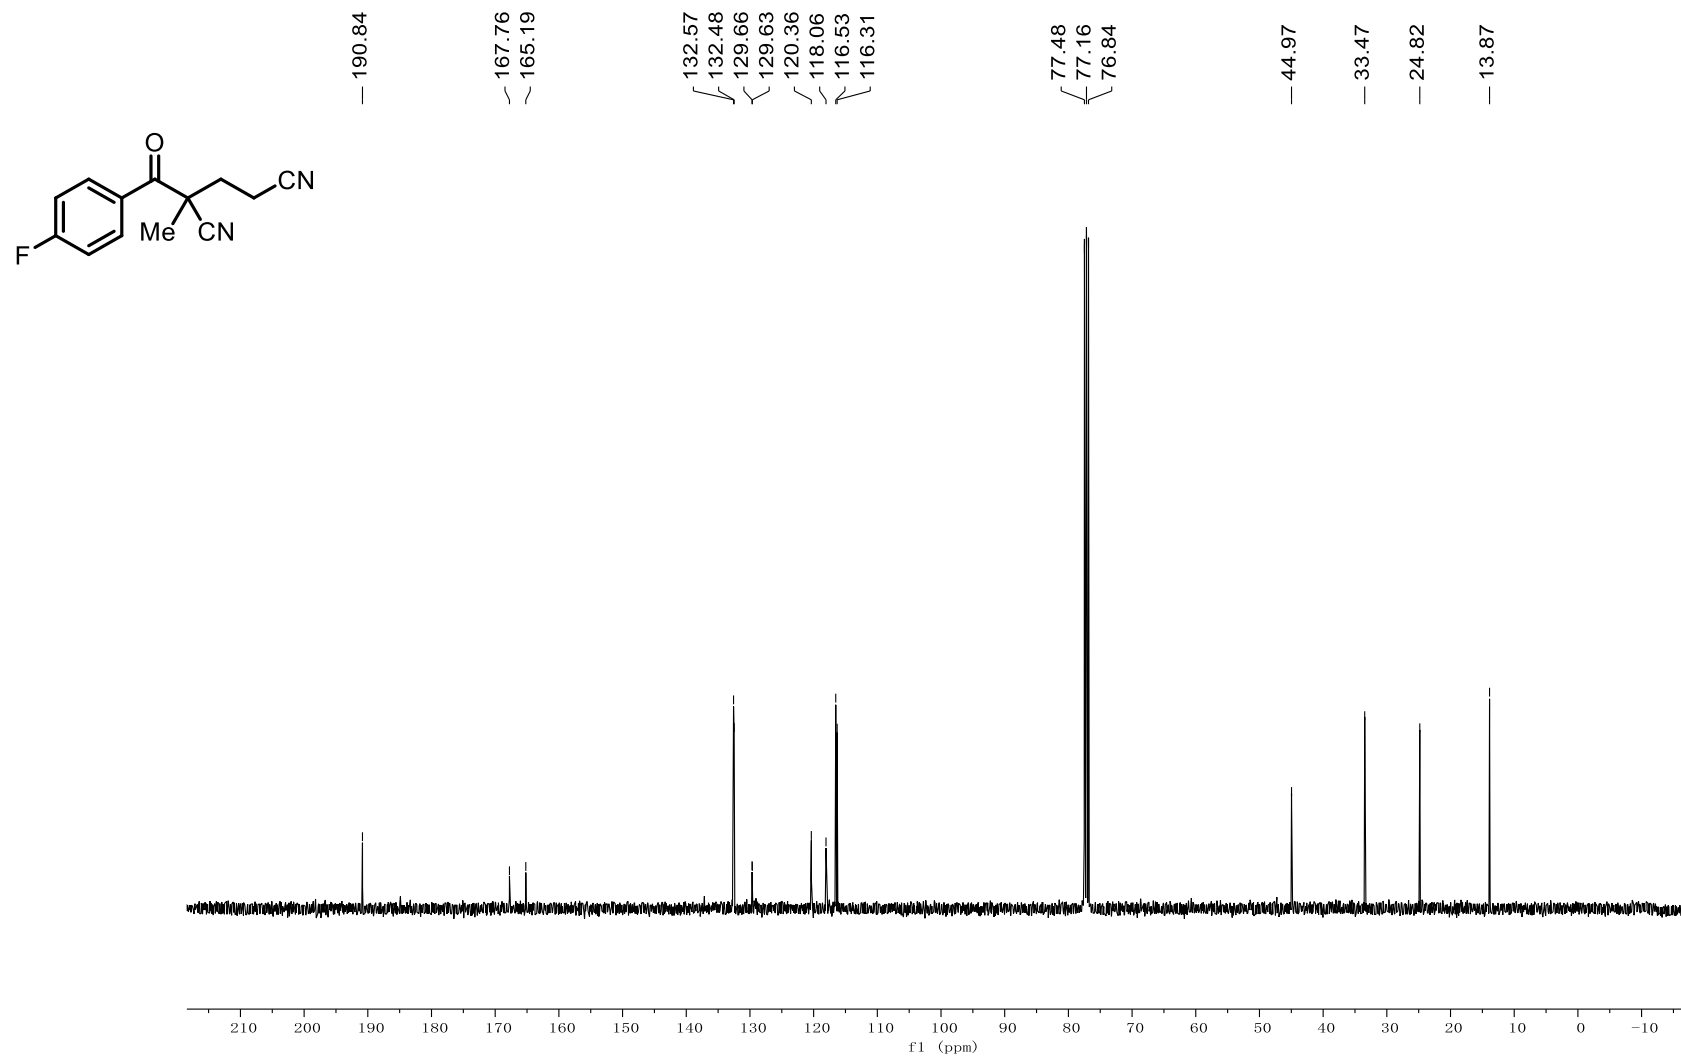

**$^{19}\text{F}$  NMR (376 MHz,  $\text{CDCl}_3$ ) spectrum of 2-(4-Fluorobenzoyl)-2-methylpentanedinitrile (55)**

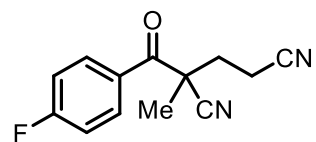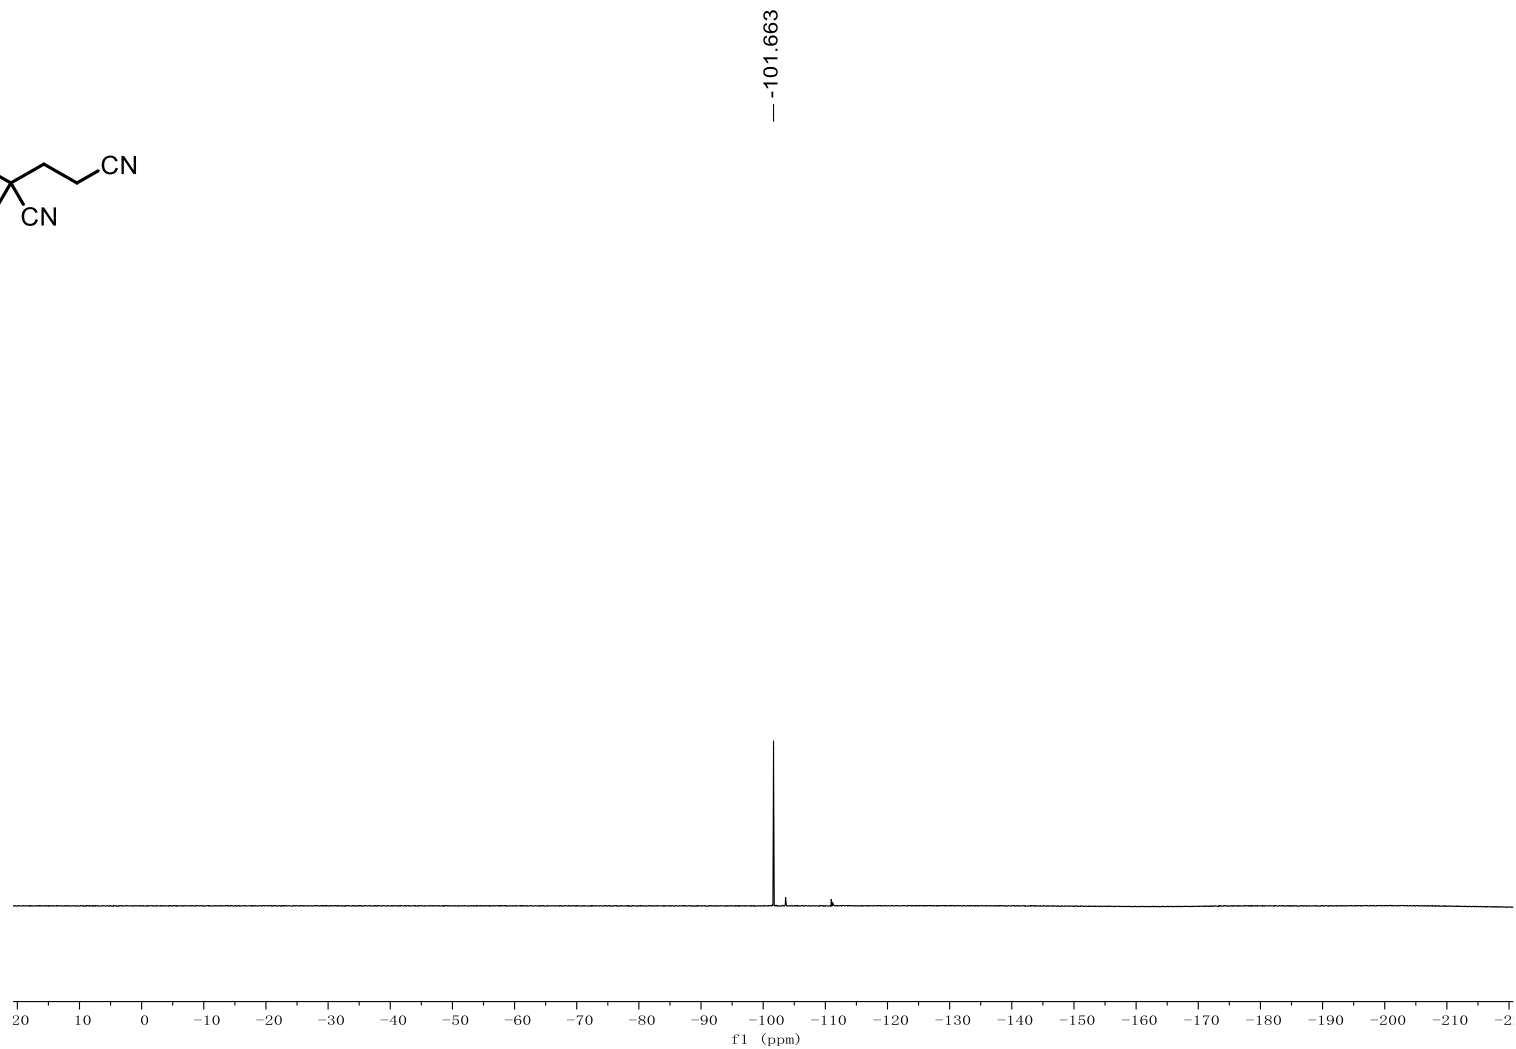

**<sup>1</sup>H NMR (400 MHz, CDCl<sub>3</sub>) spectrum of 2-(4-Chlorobenzoyl)-2-methylpentanedinitrile (56)**

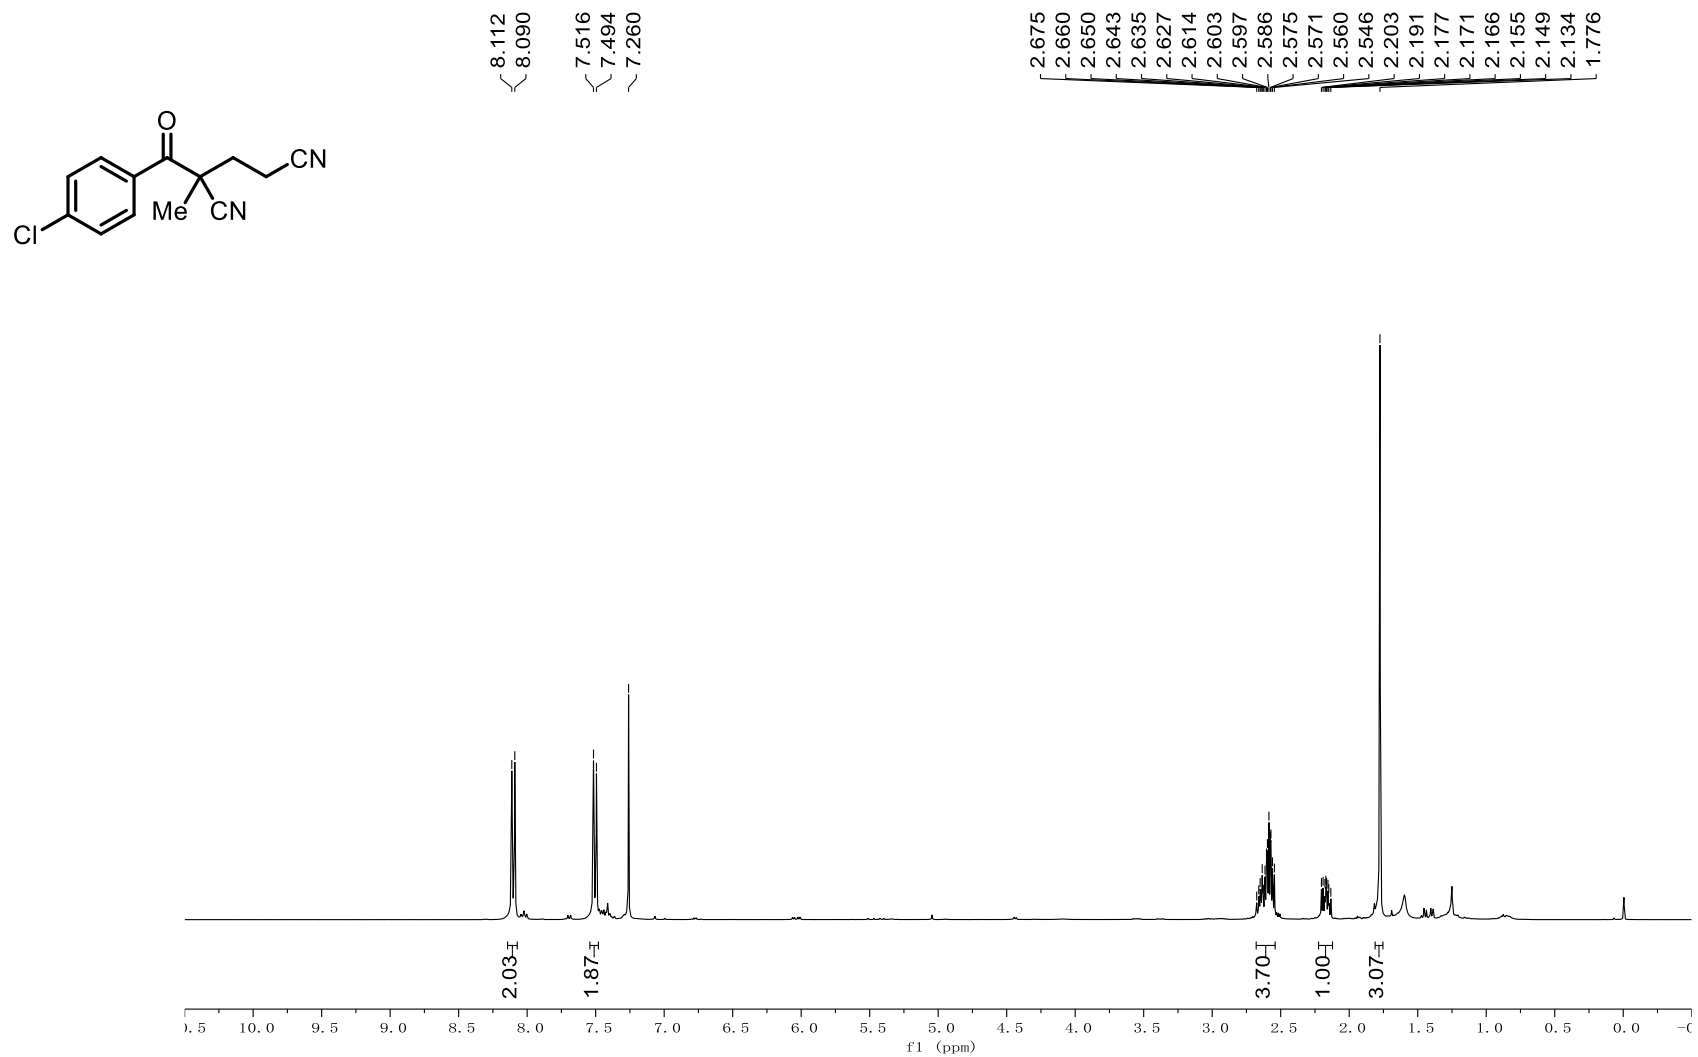

<sup>13</sup>C NMR (100 MHz, CDCl<sub>3</sub>) spectrum of 2-(4-Chlorobenzoyl)-2-methylpentanedinitrile (56)

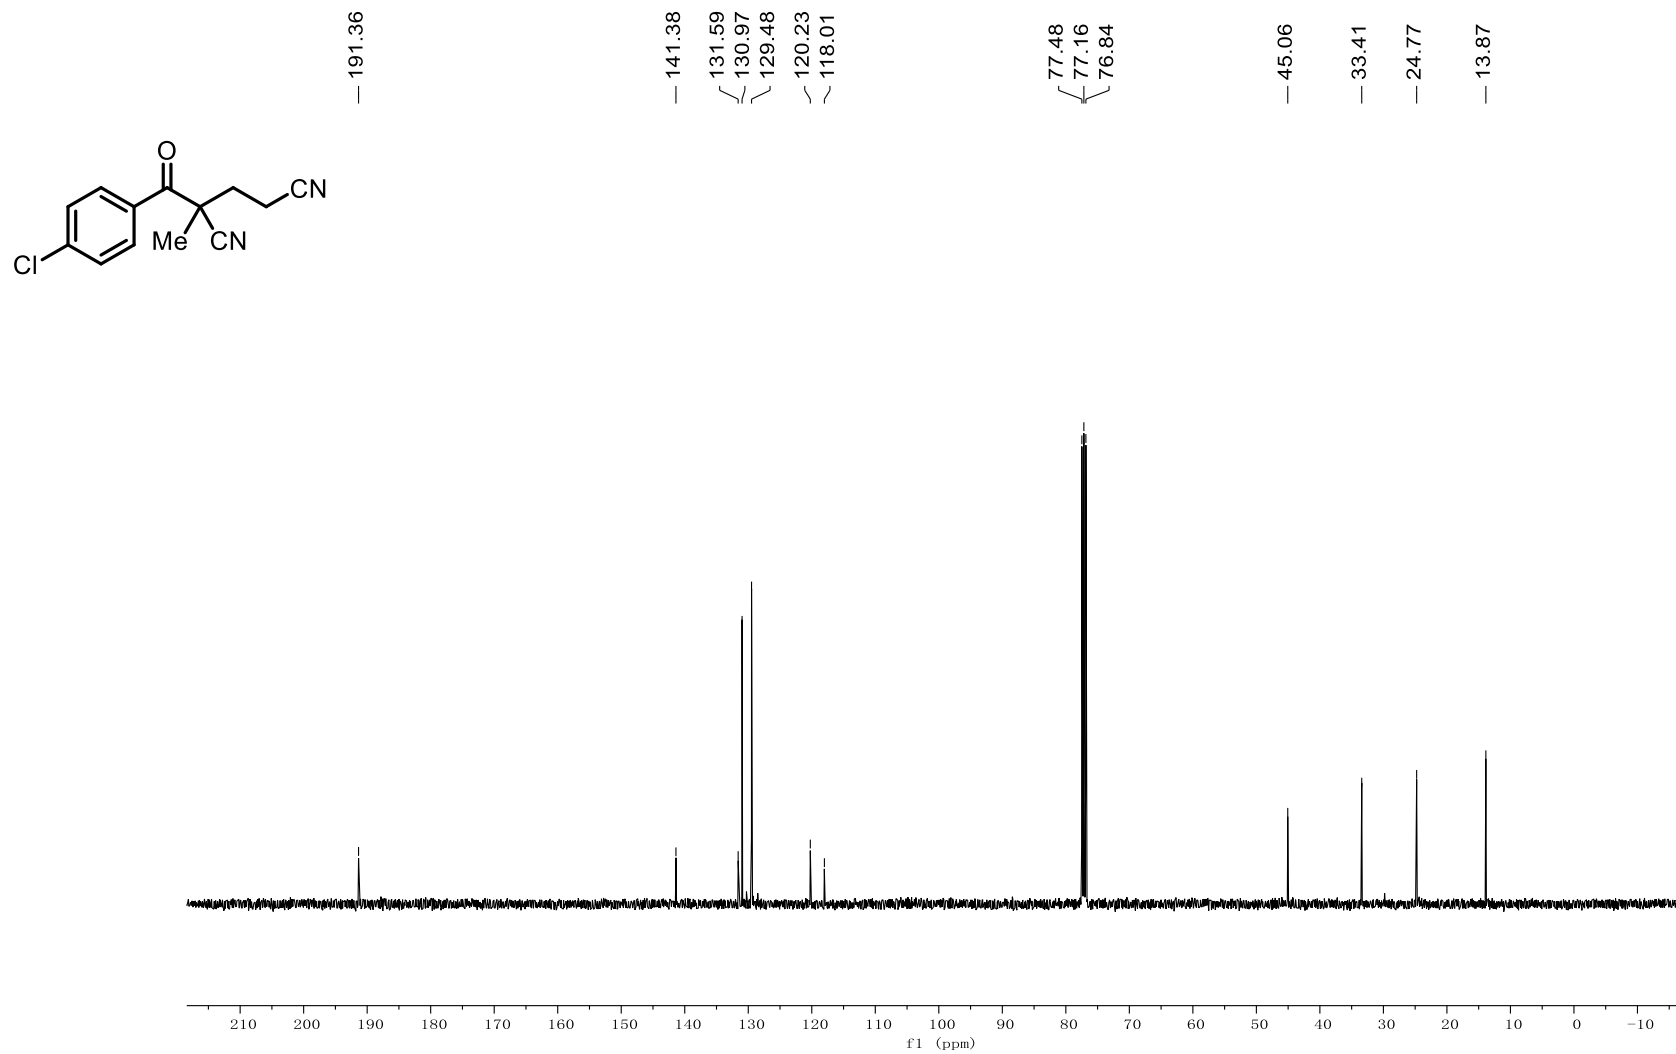

<sup>1</sup>H NMR (400 MHz, CDCl<sub>3</sub>) spectrum of 2-(4-Bromobenzoyl)-2-methylpentanedinitrile (57)

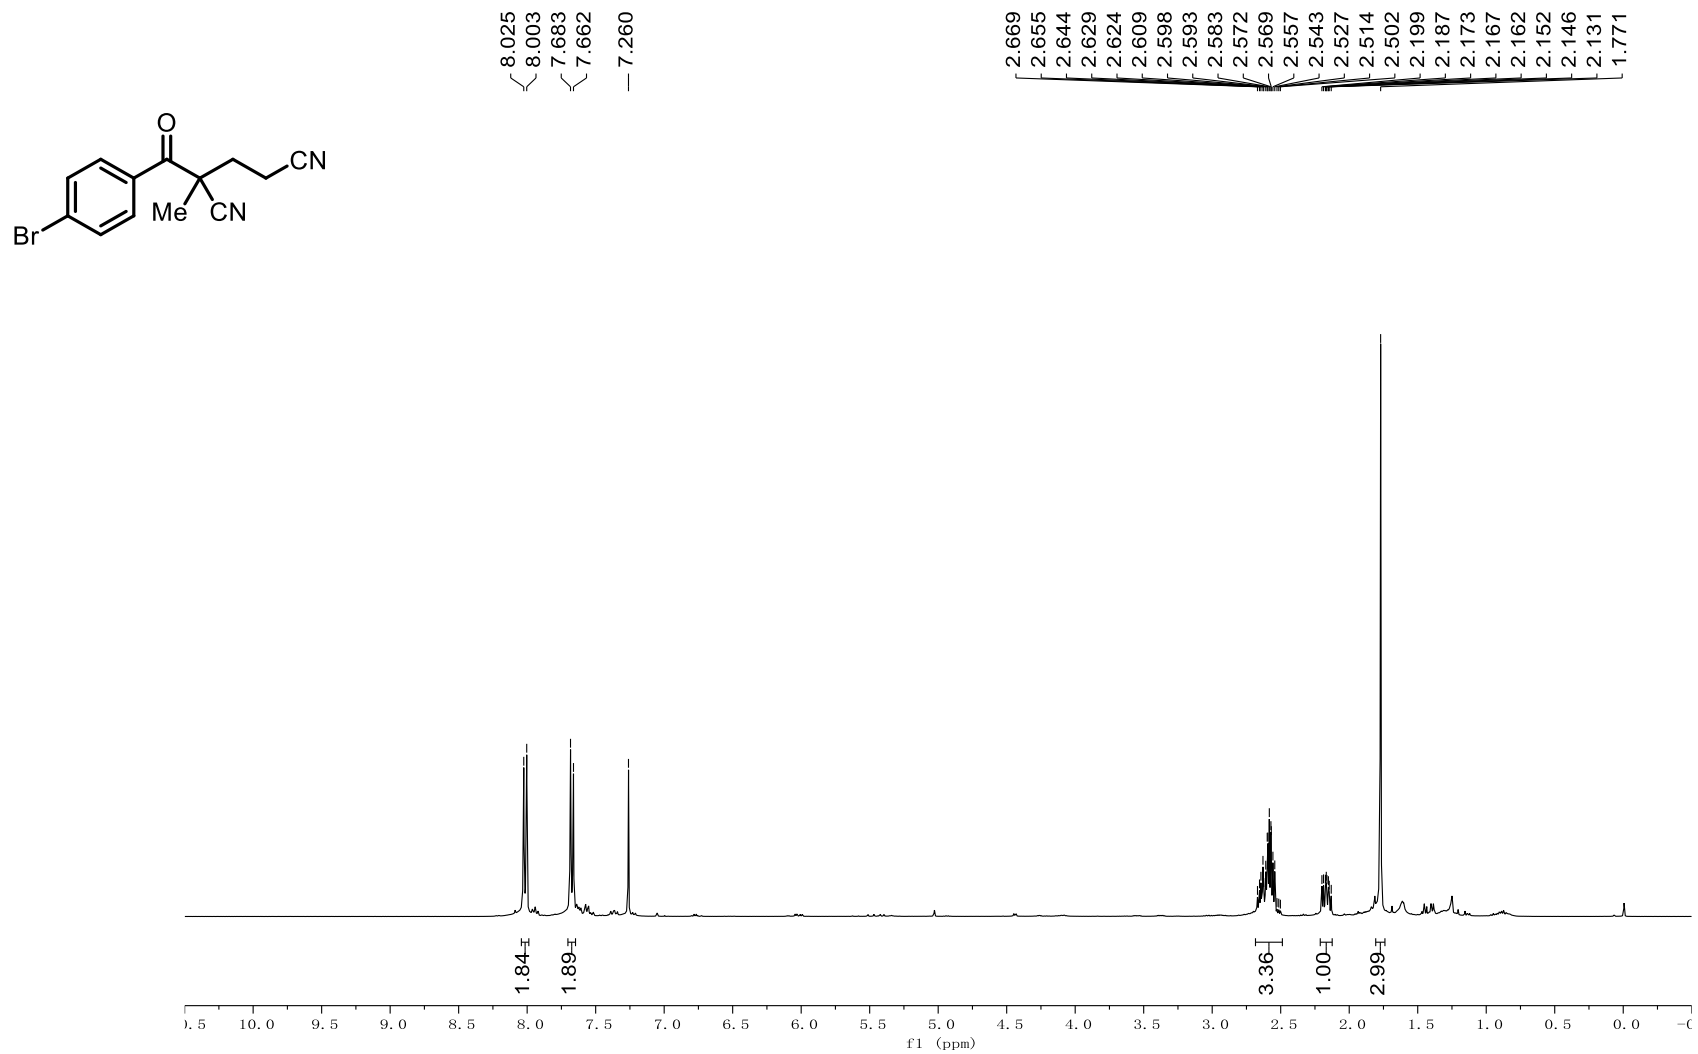

<sup>13</sup>C NMR (100 MHz, CDCl<sub>3</sub>) spectrum of 2-(4-Bromobenzoyl)-2-methylpentanedinitrile (57)

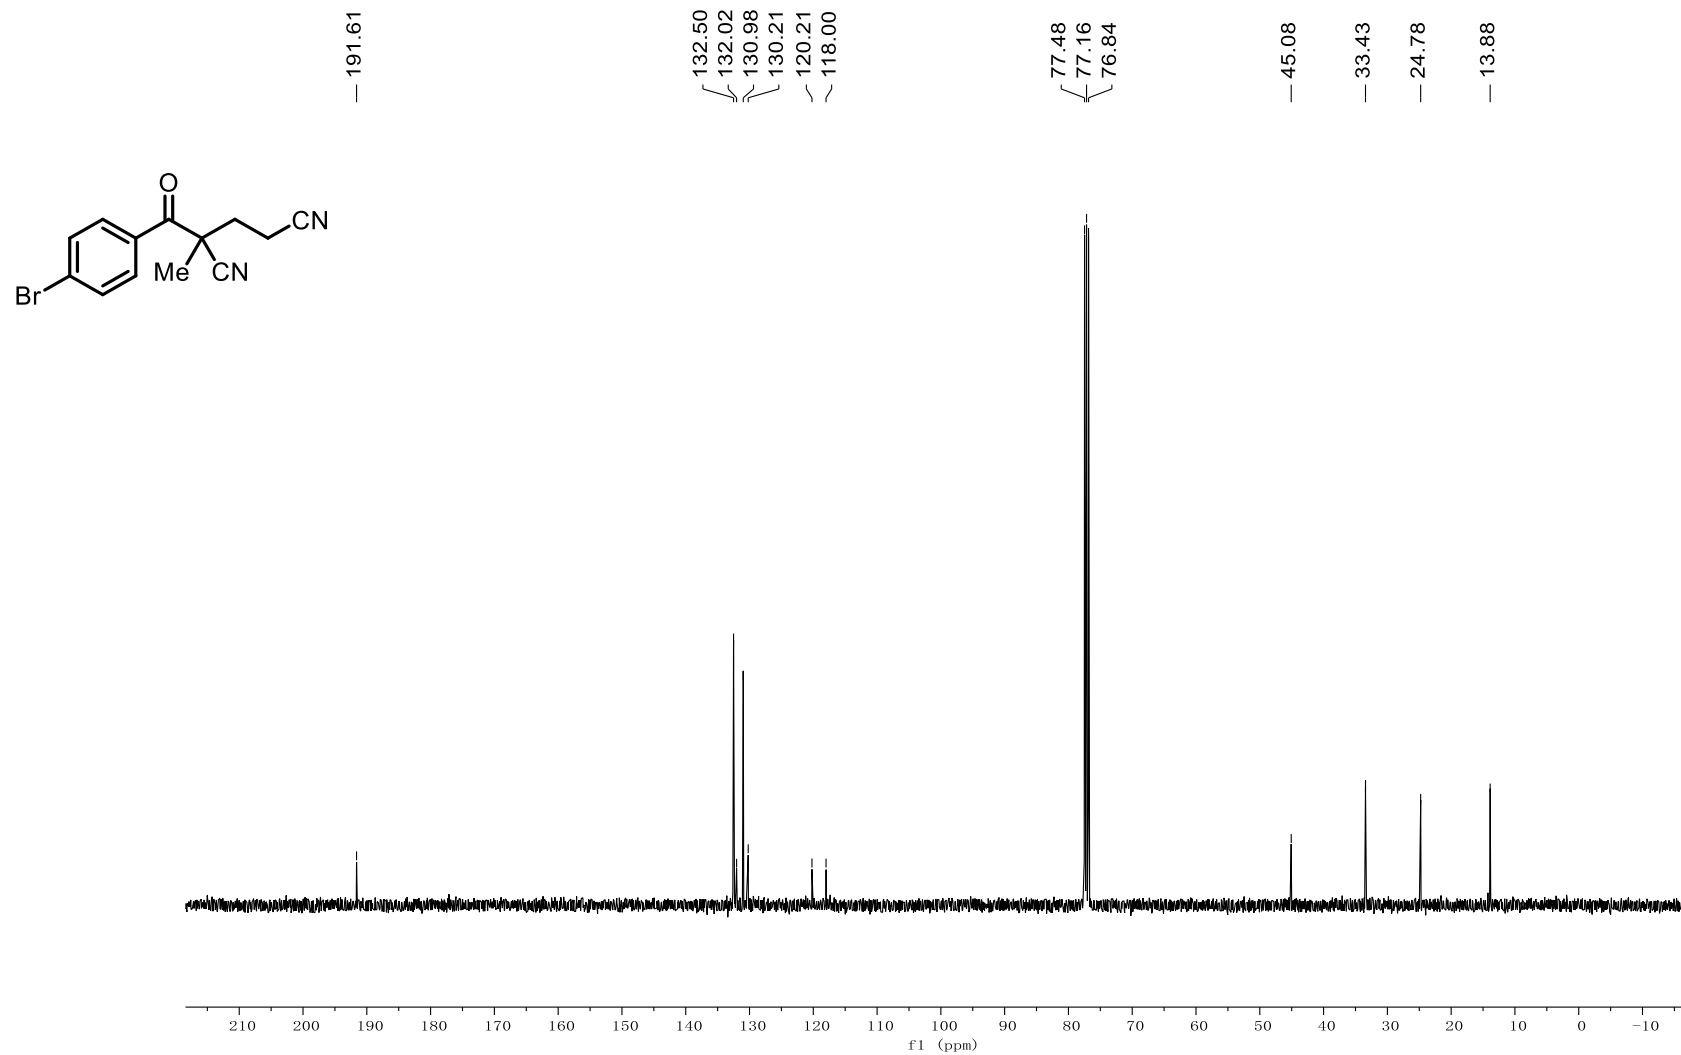

<sup>1</sup>H NMR (400 MHz, CDCl<sub>3</sub>) spectrum of 2-([1,1'-Biphenyl]-4-carbonyl)-2-methylpentanedinitrile (**58**)

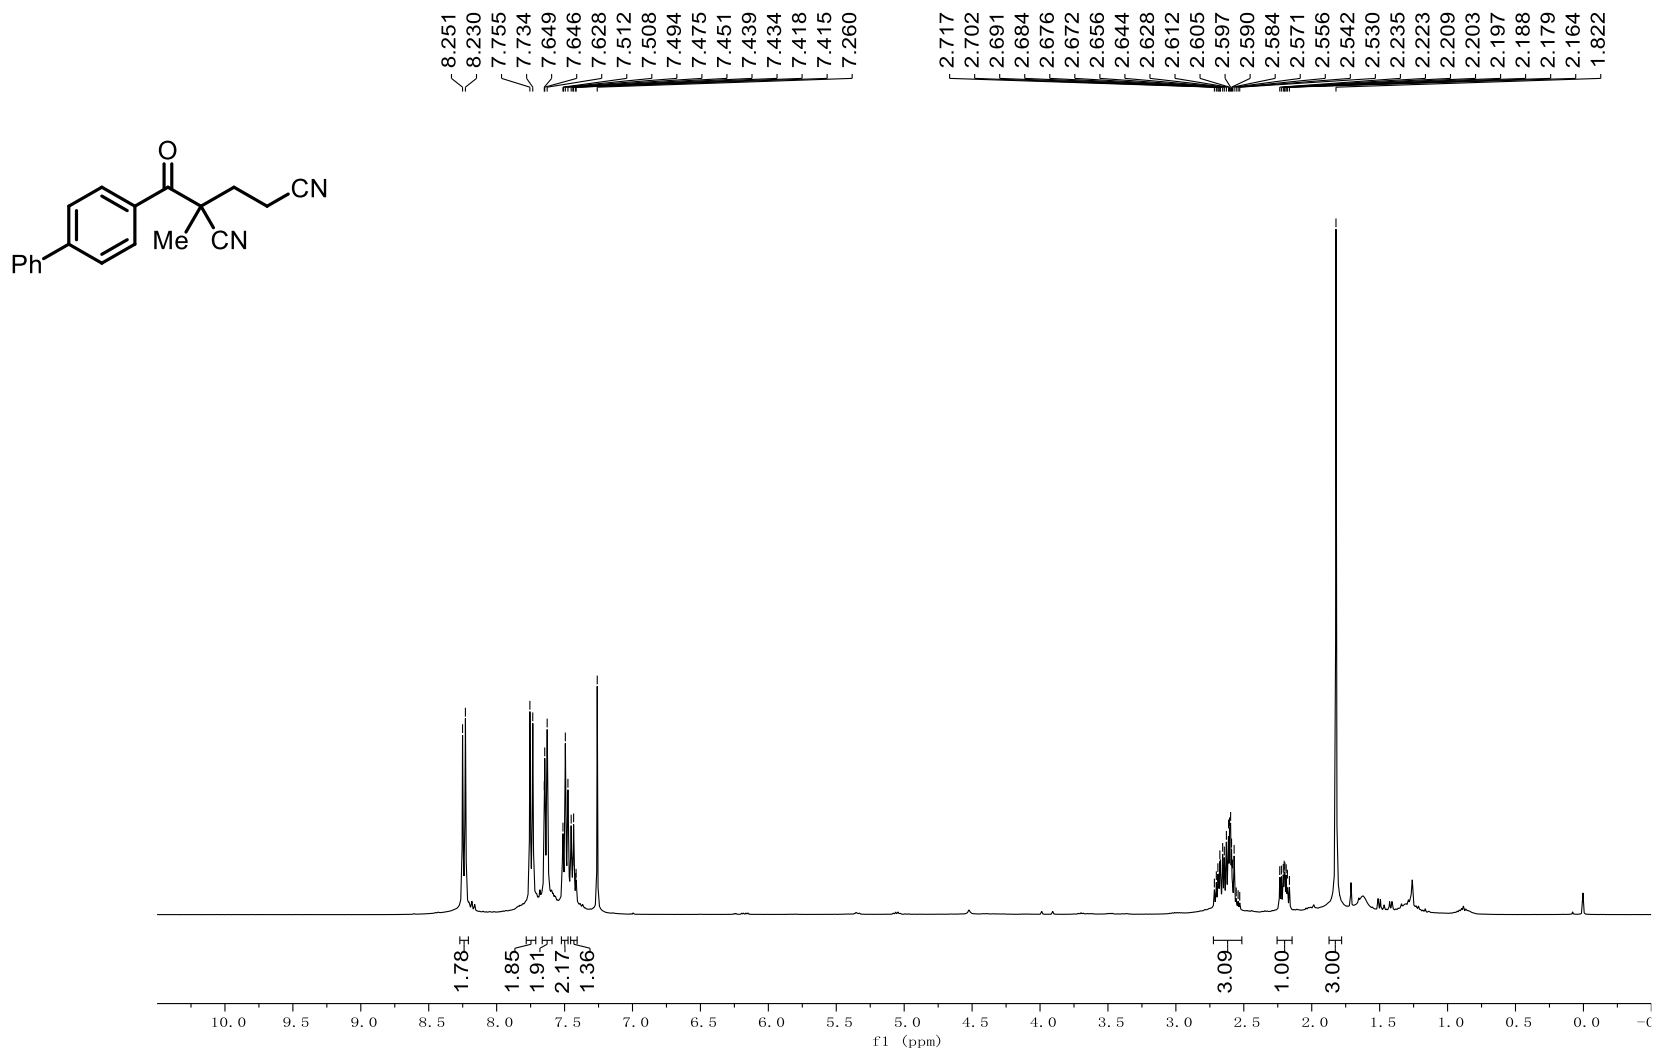

<sup>13</sup>C NMR (100 MHz, CDCl<sub>3</sub>) spectrum of 2-([1,1'-Biphenyl]-4-carbonyl)-2-methylpentanedinitrile (58)

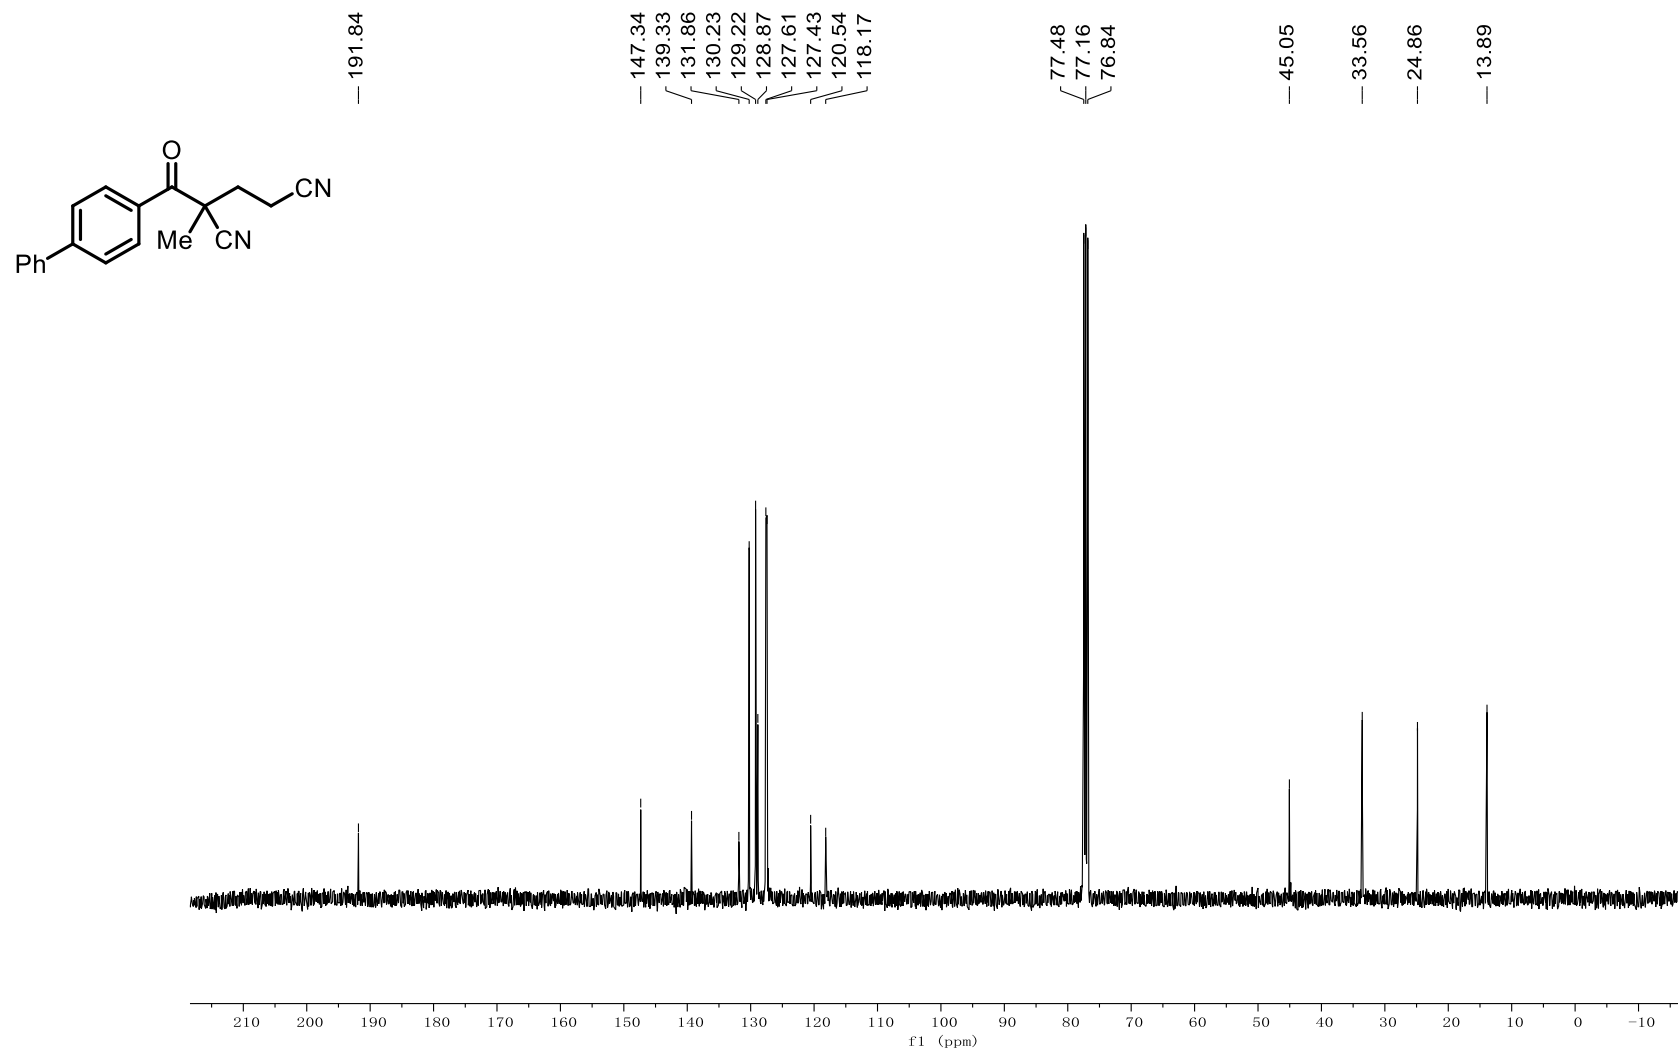

**<sup>1</sup>H NMR (400 MHz, CDCl<sub>3</sub>) spectrum of 2-(Anthracene-9-carbonyl)-2-methylpentanedinitrile (59)**

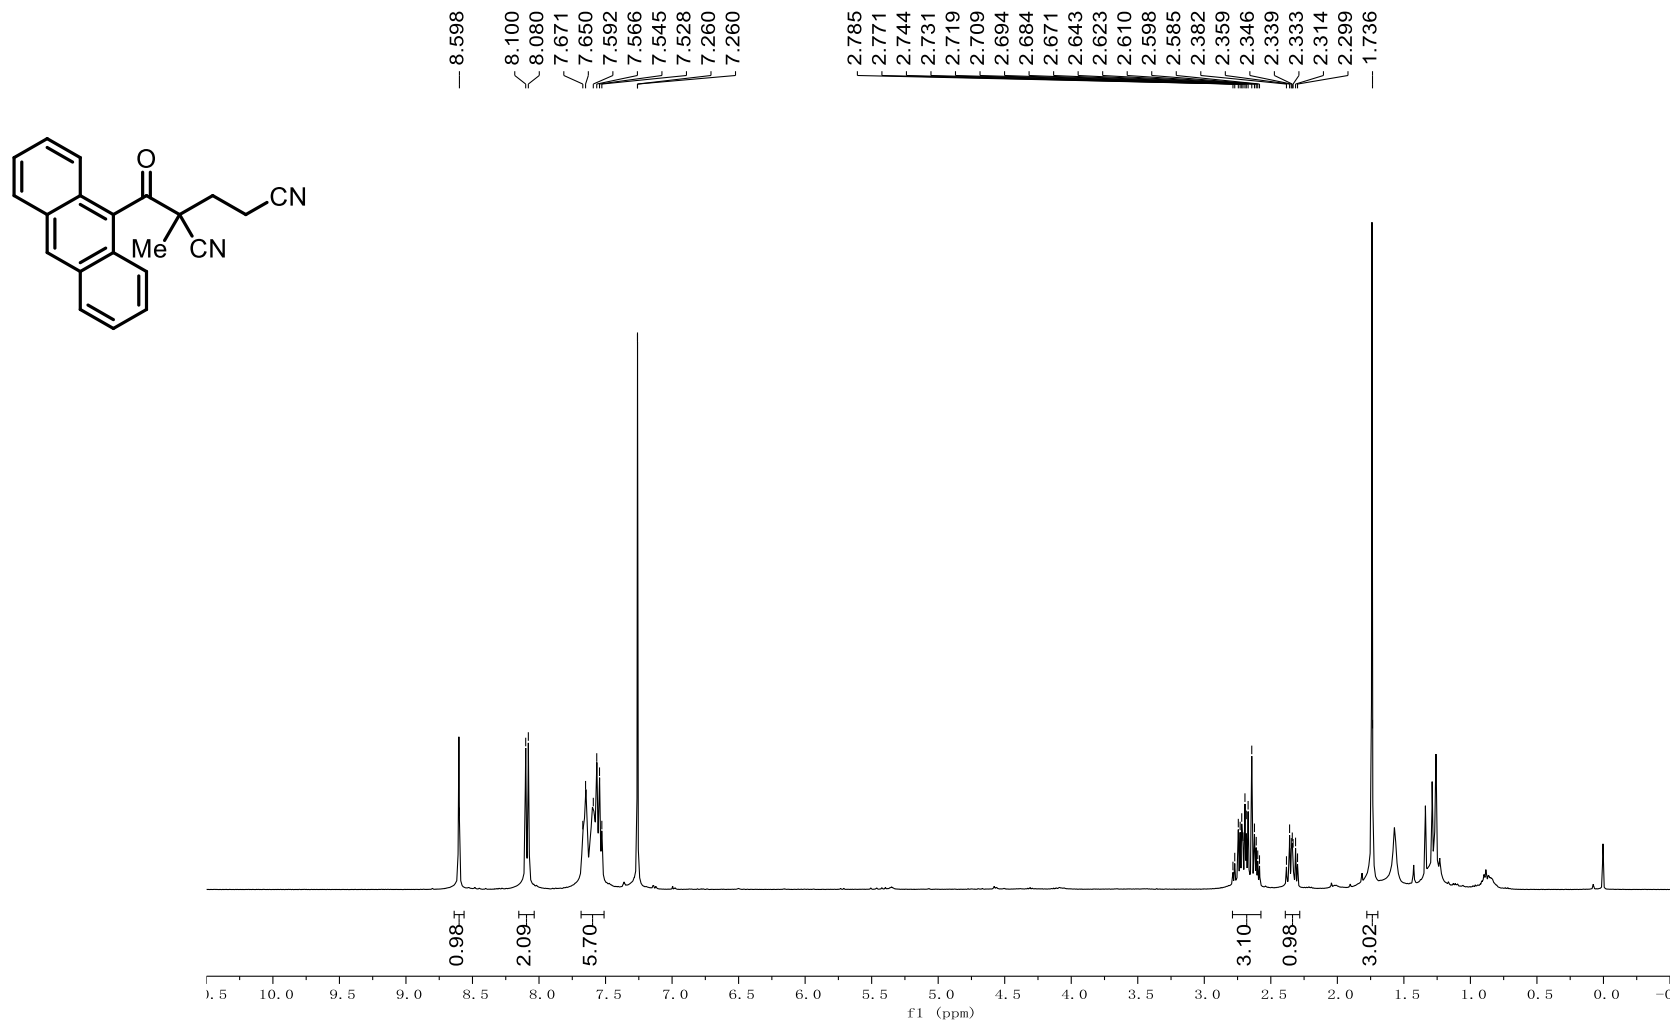

<sup>13</sup>C NMR (100 MHz, CDCl<sub>3</sub>) spectrum of 2-(Anthracene-9-carbonyl)-2-methylpentanedinitrile (59)

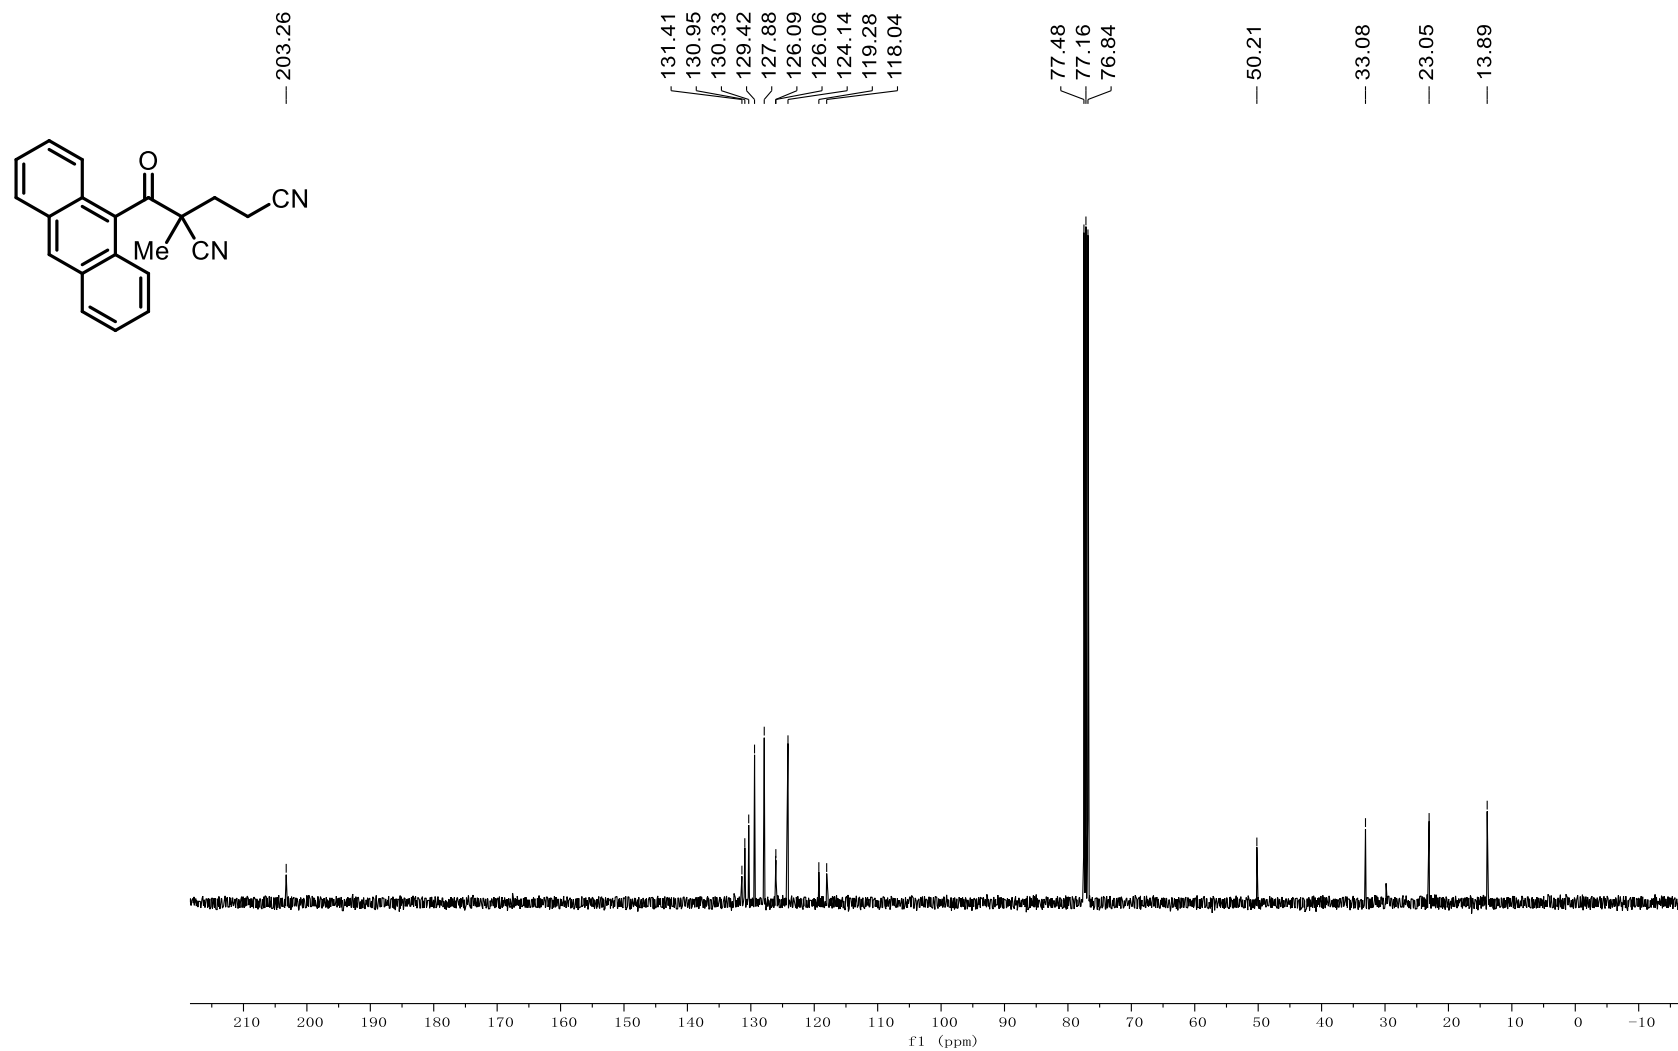

**<sup>1</sup>H NMR (400 MHz, CDCl<sub>3</sub>) spectrum of 2-Methyl-2-(thiophene-2-carbonyl)pentanedinitrile (60)**

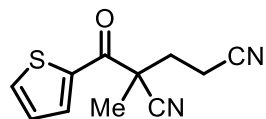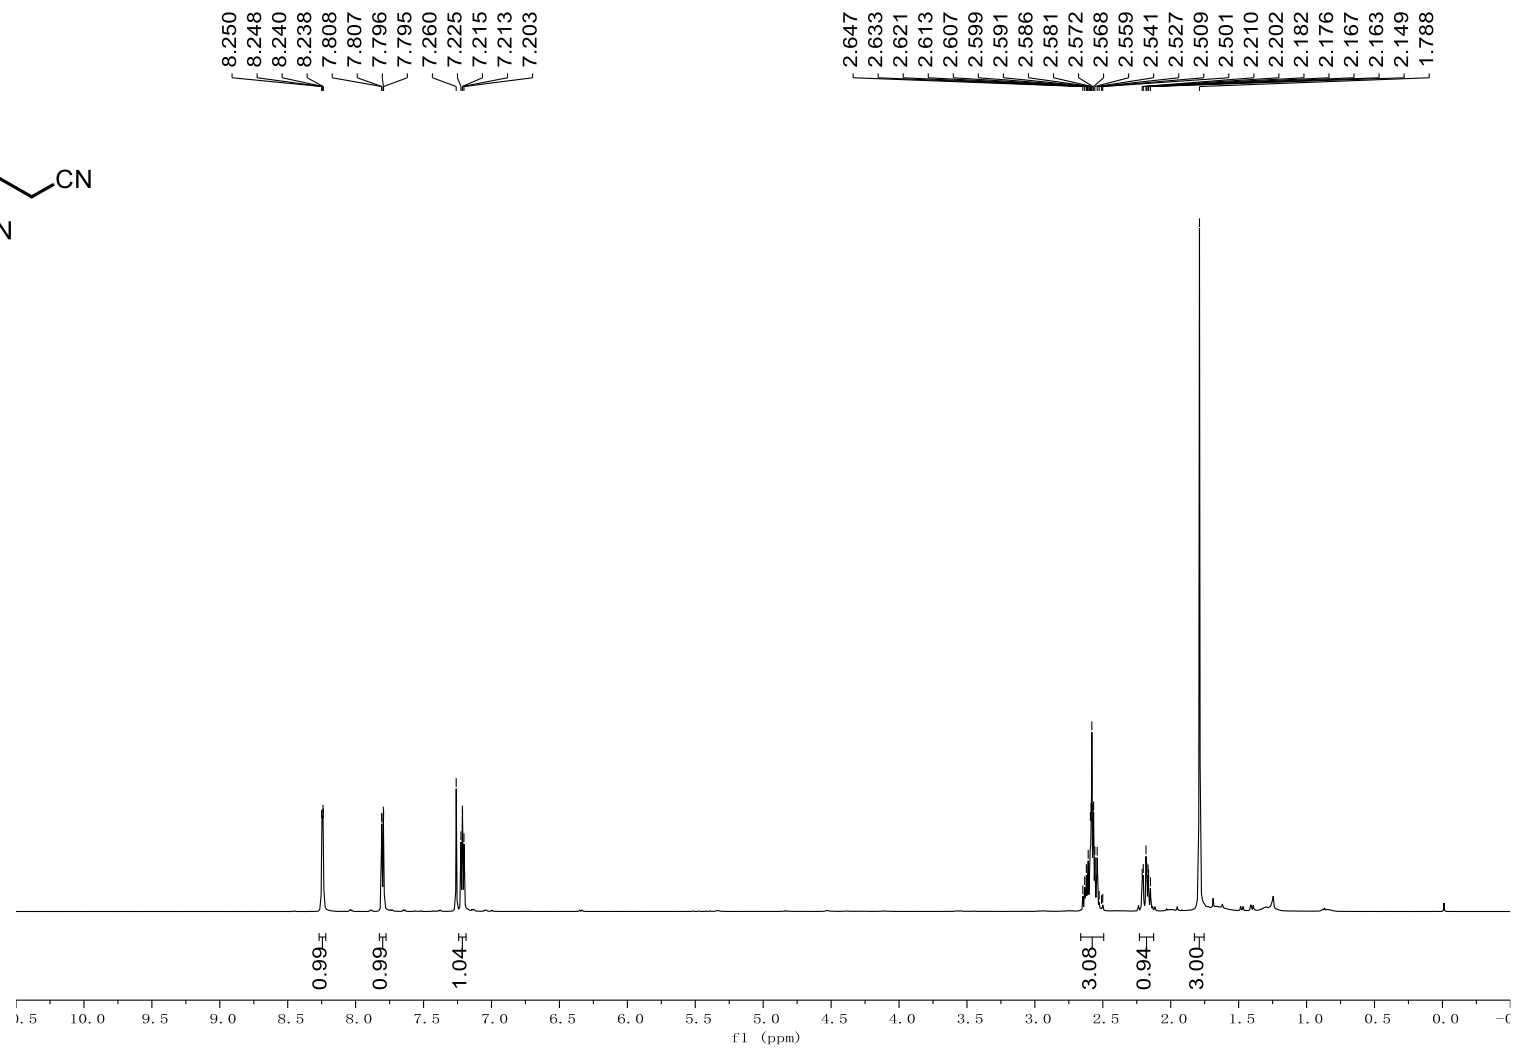

<sup>13</sup>C NMR (100 MHz, CDCl<sub>3</sub>) spectrum of 2-Methyl-2-(thiophene-2-carbonyl)pentanedinitrile (60)

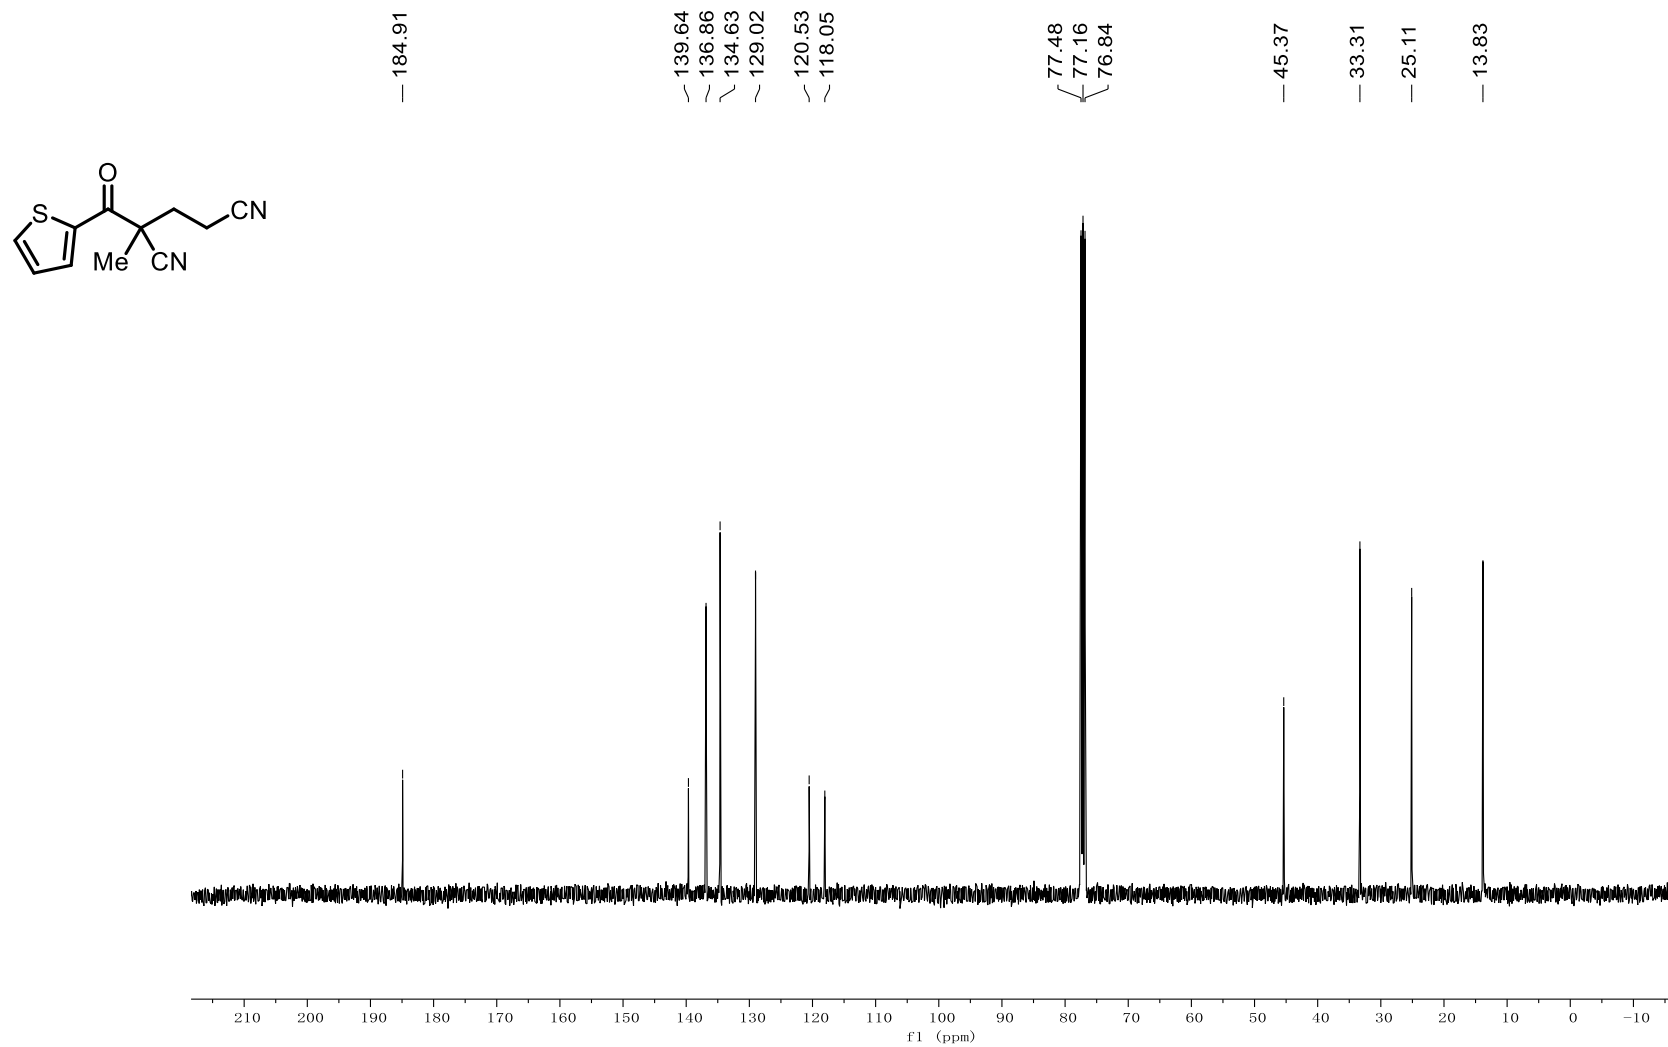

<sup>1</sup>H NMR (400 MHz, CDCl<sub>3</sub>) spectrum of 2-(6-Methoxynicotinoyl)-2-methylpentanedinitrile (61)

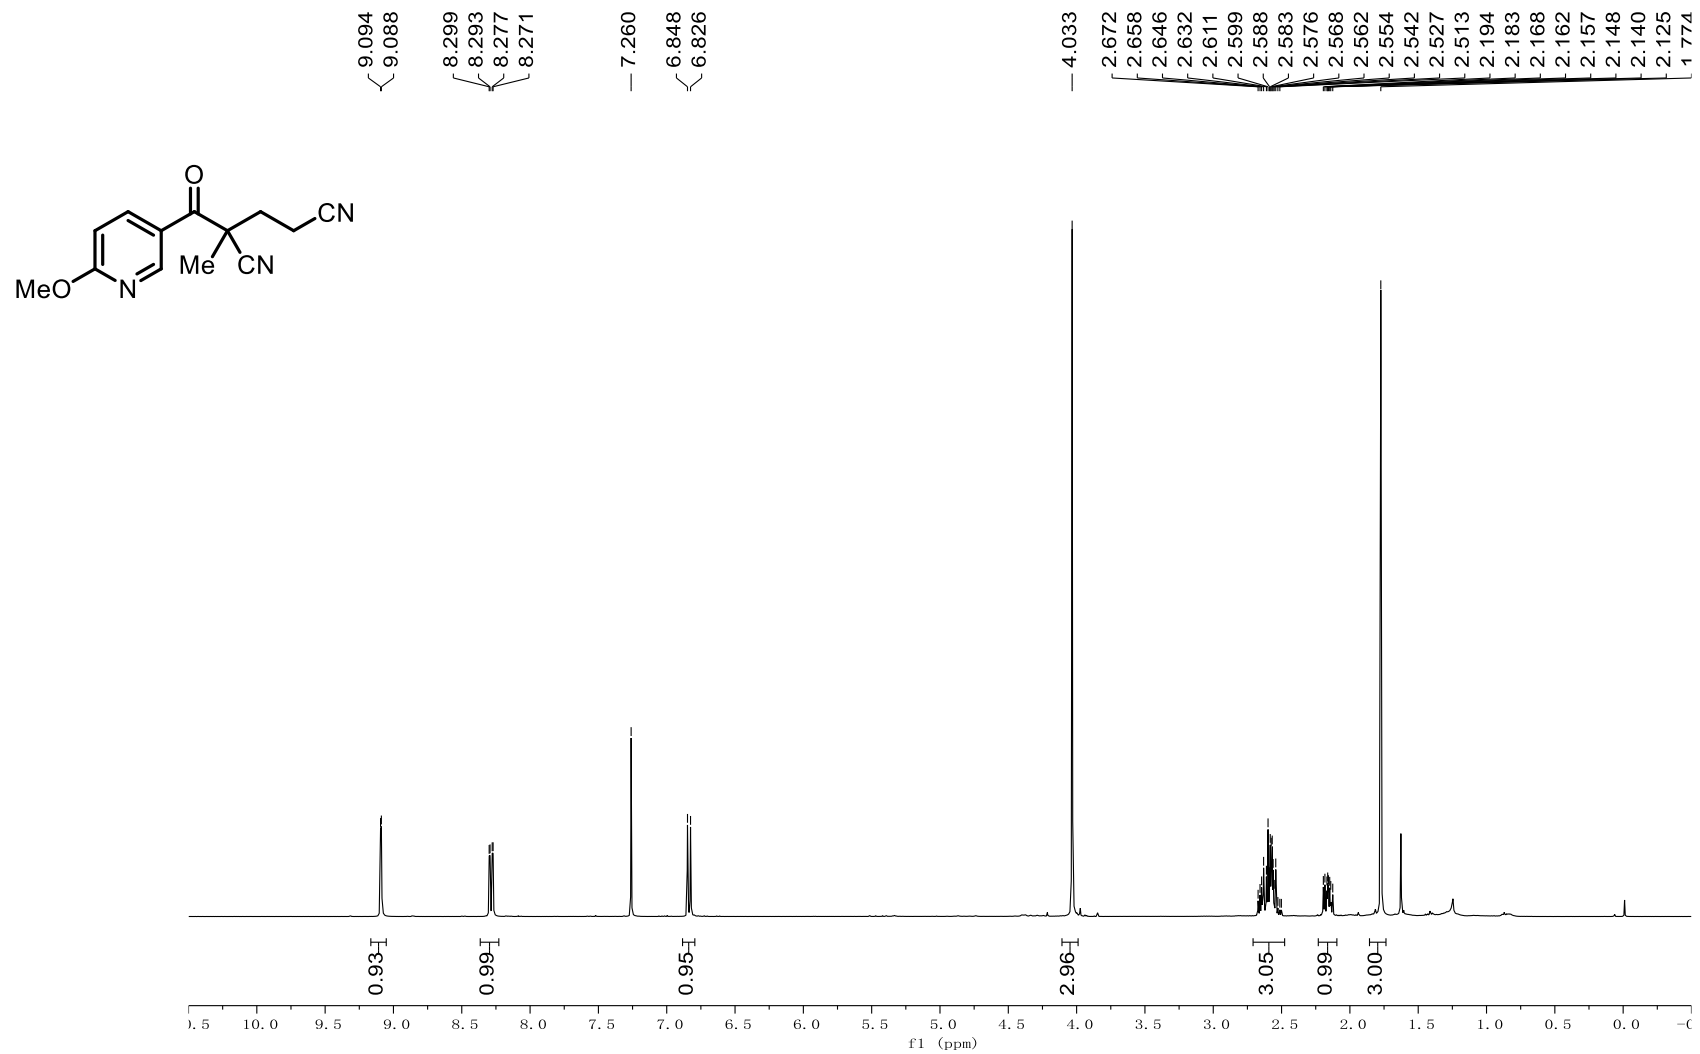

<sup>13</sup>C NMR (100 MHz, CDCl<sub>3</sub>) spectrum of 2-(6-Methoxynicotinoyl)-2-methylpentanedinitrile (61)

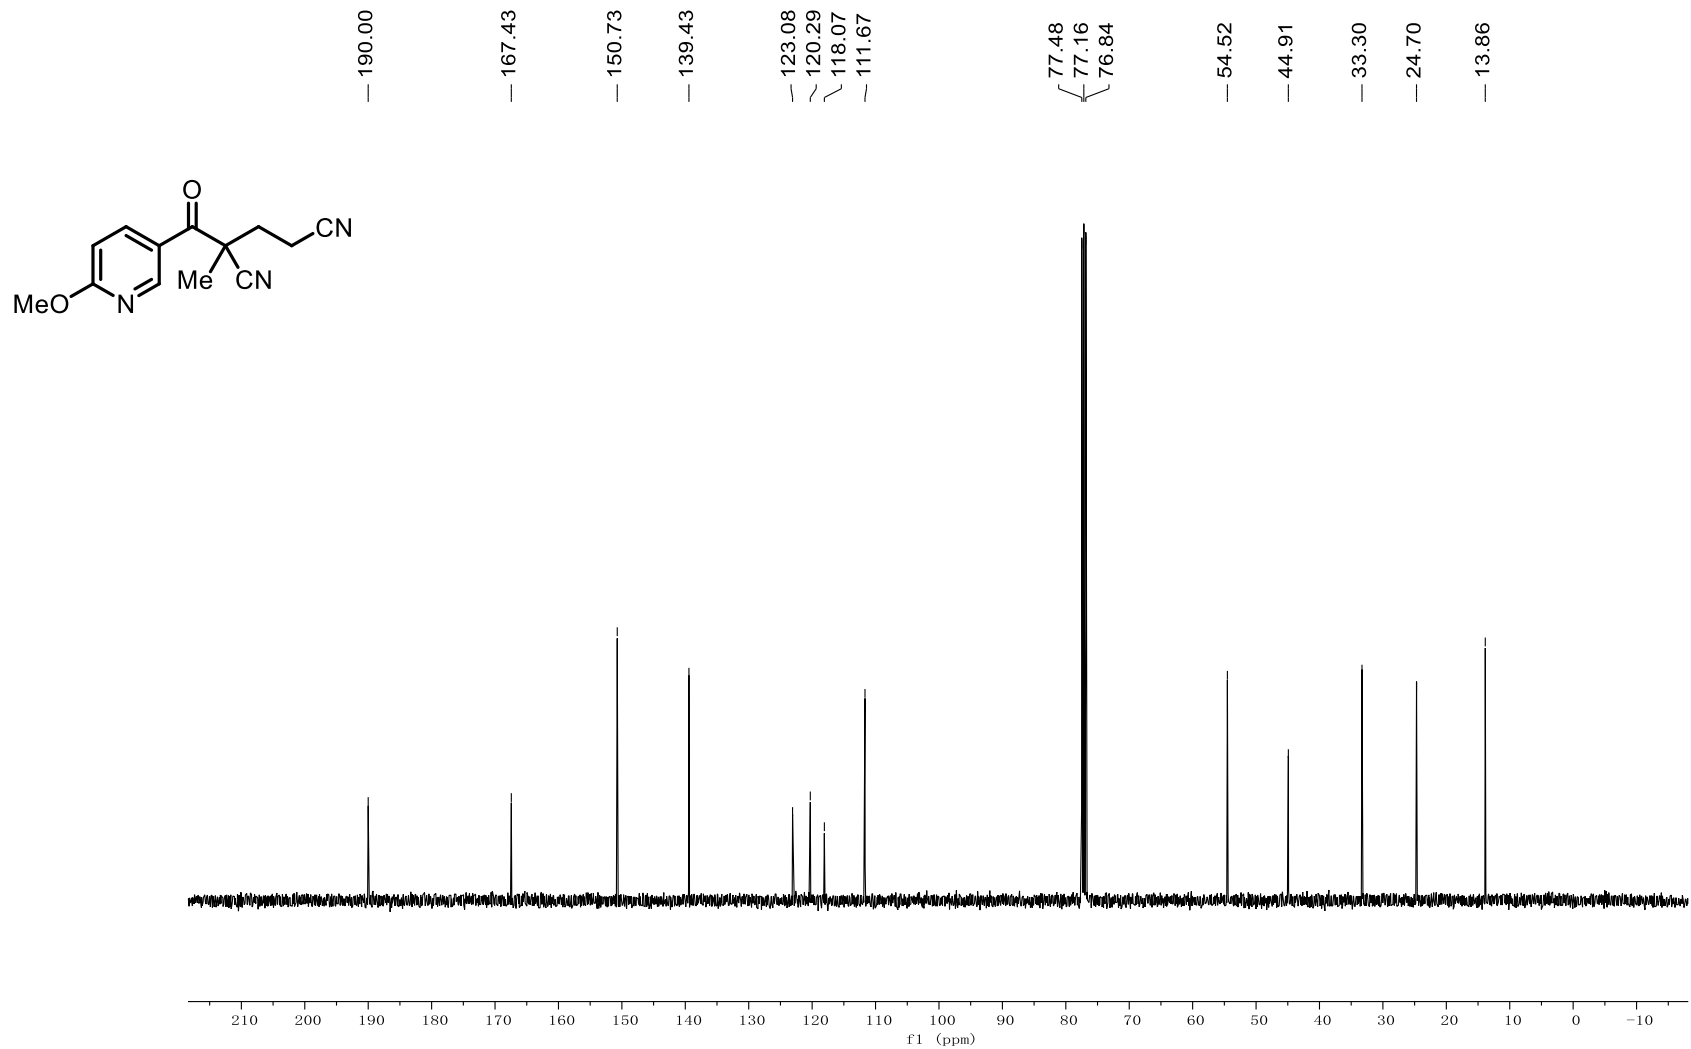

**<sup>1</sup>H NMR (400 MHz, CDCl<sub>3</sub>) spectrum of 2-Methyl-2-(4-phenylbutanoyl)pentanedinitrile (62)**

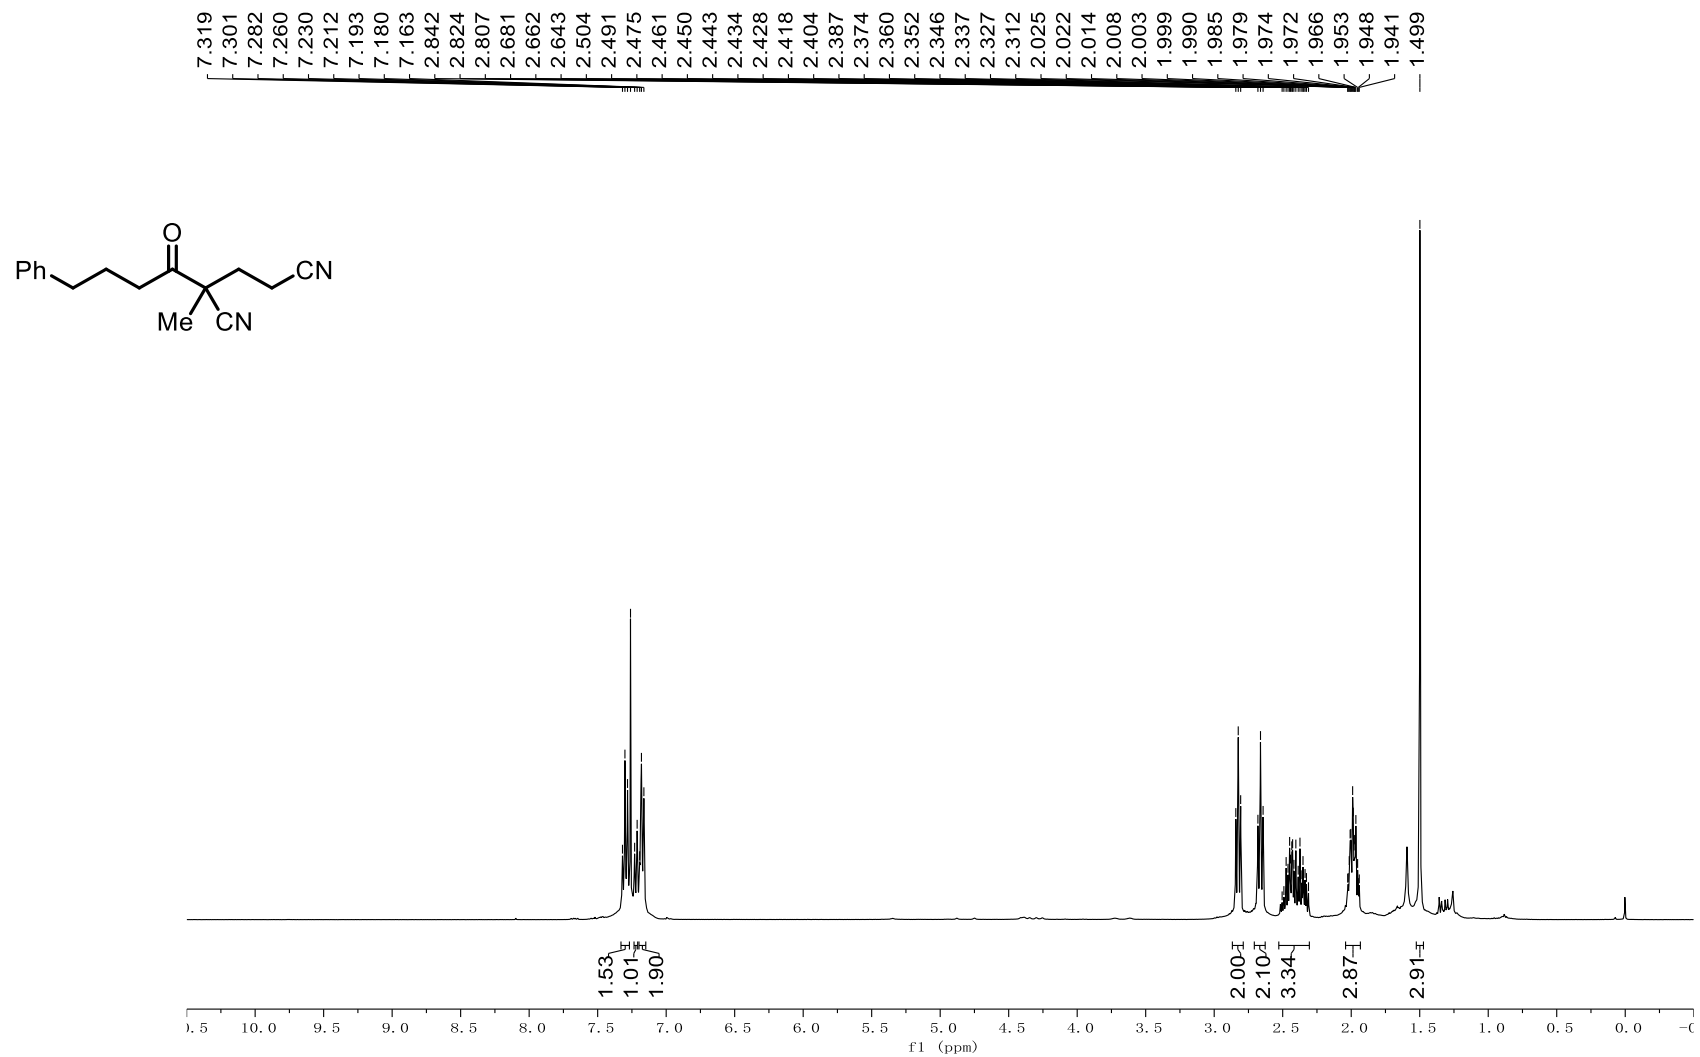

<sup>13</sup>C NMR (100 MHz, CDCl<sub>3</sub>) spectrum of 2-Methyl-2-(4-phenylbutanoyl)pentanedinitrile (6)

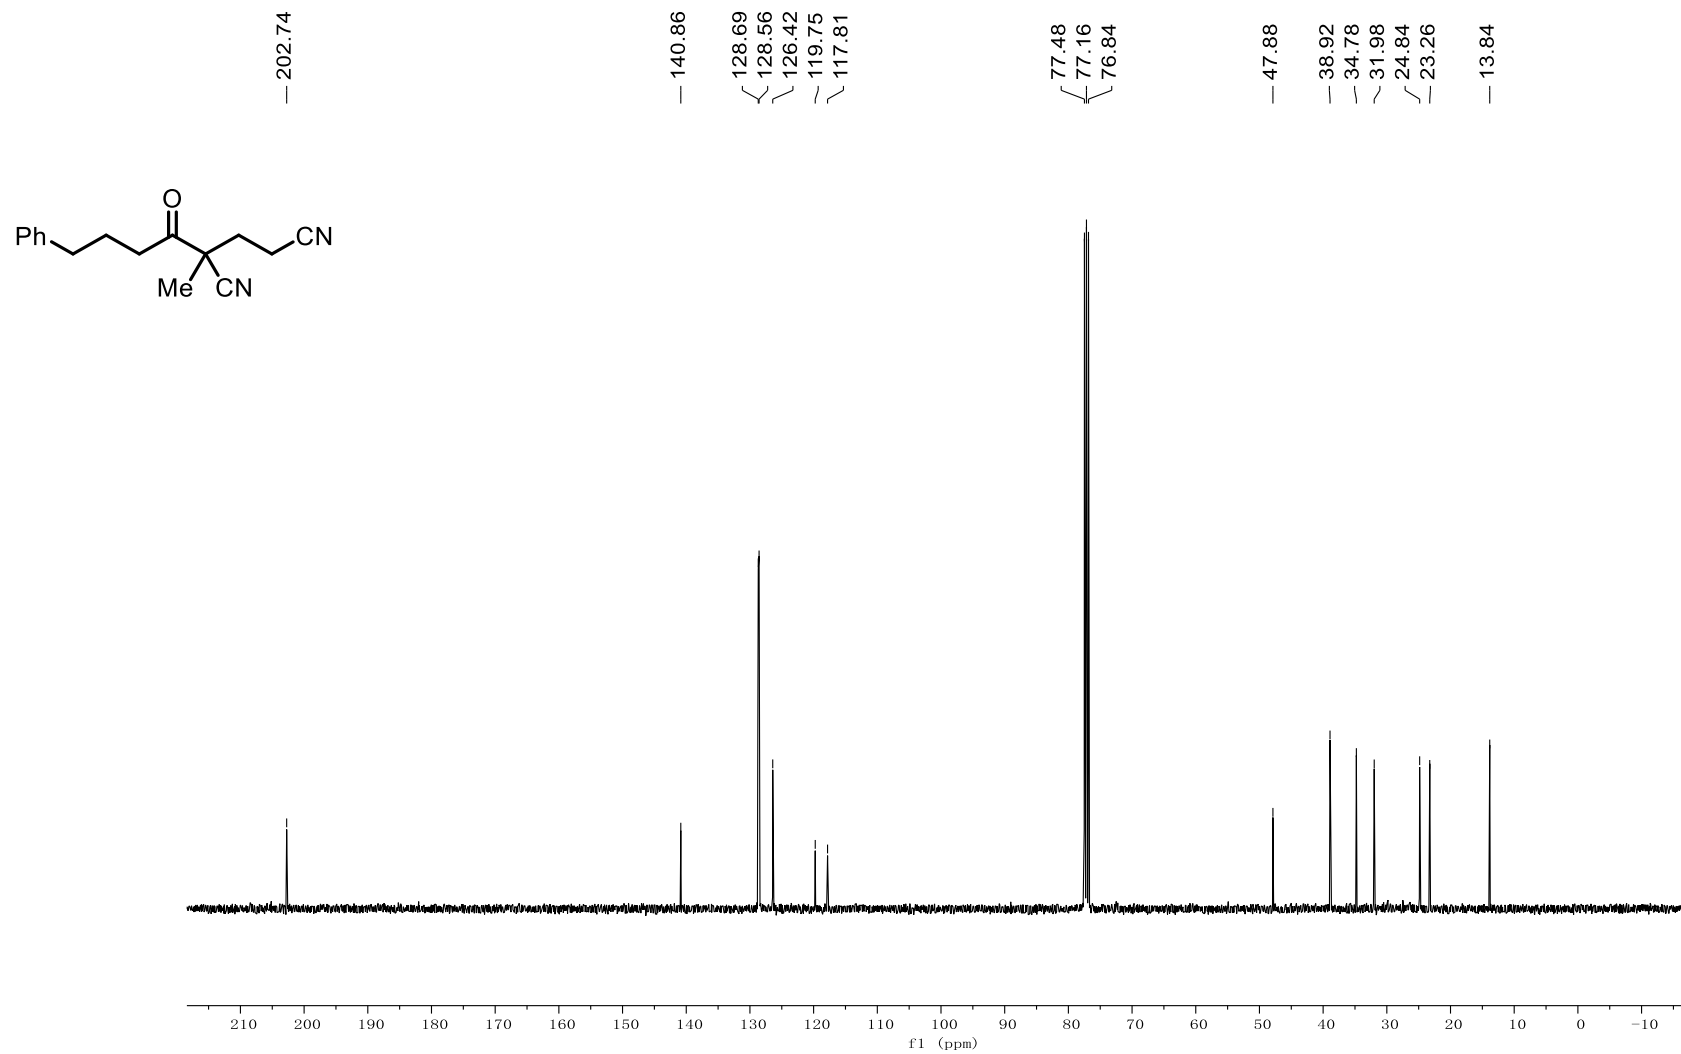

<sup>1</sup>H NMR (400 MHz, CDCl<sub>3</sub>) spectrum of 2-Methyl-2-octanoylpentanedinitrile (63)

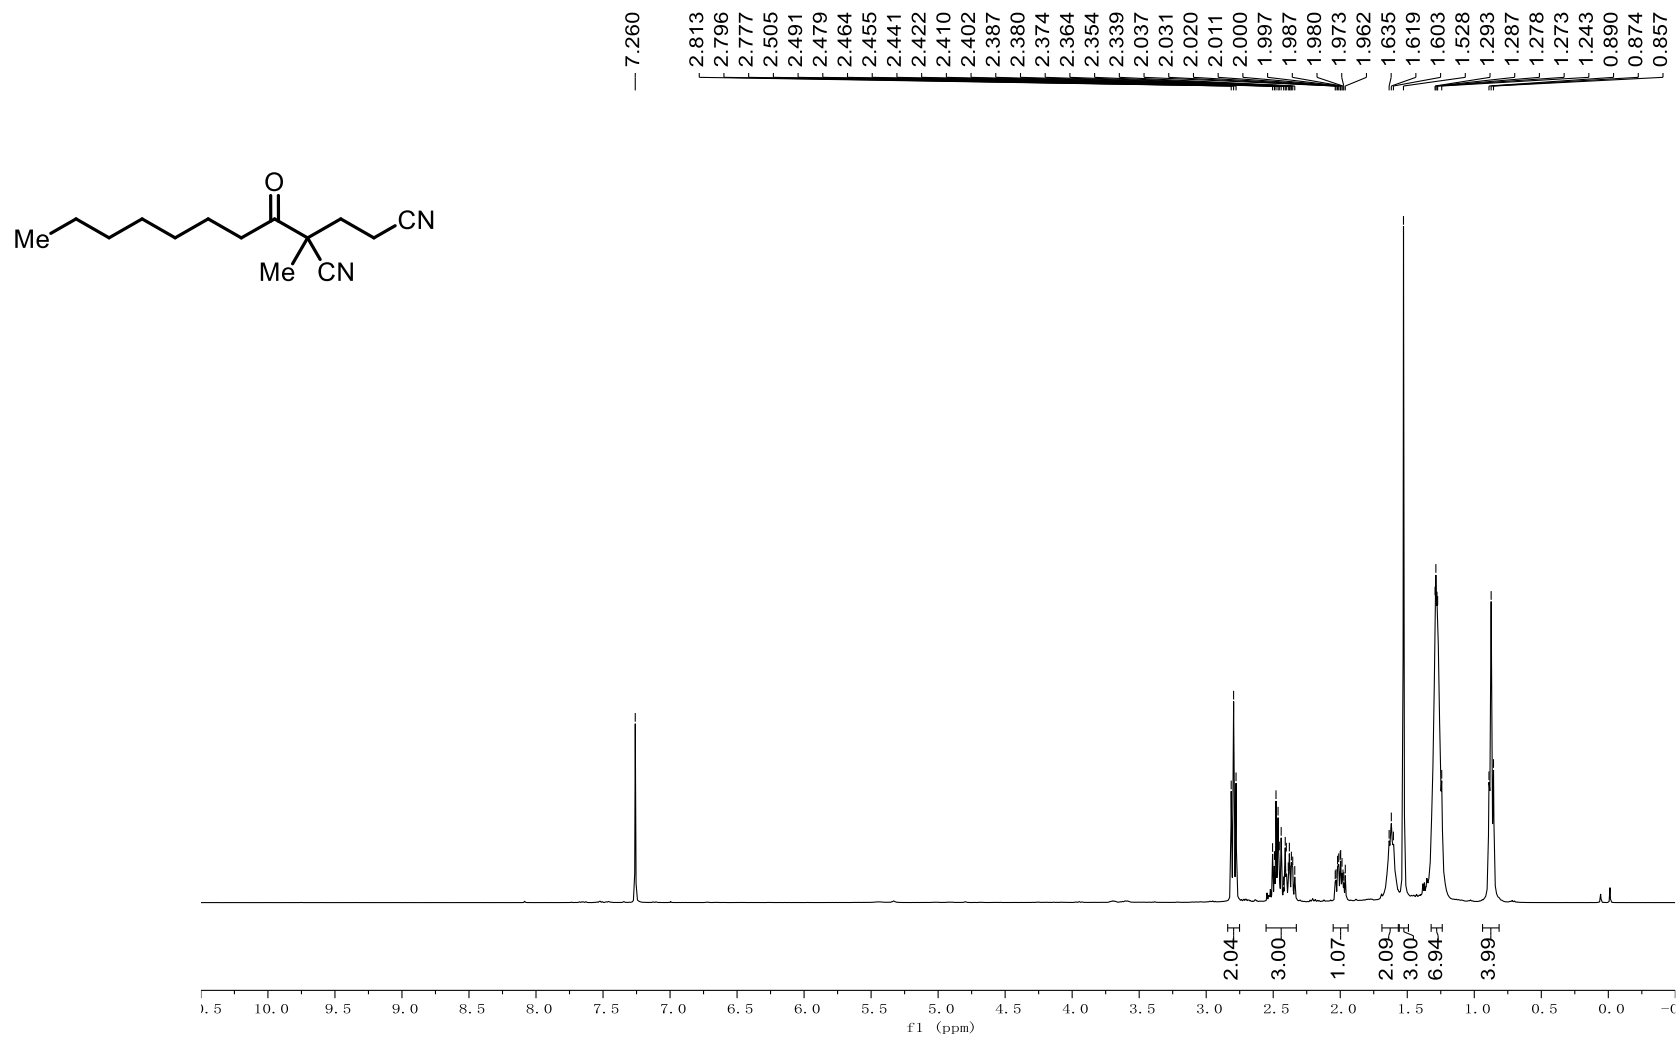

<sup>13</sup>C NMR (100 MHz, CDCl<sub>3</sub>) spectrum of 2-Methyl-2-octanoylpentanedinitrile (63)

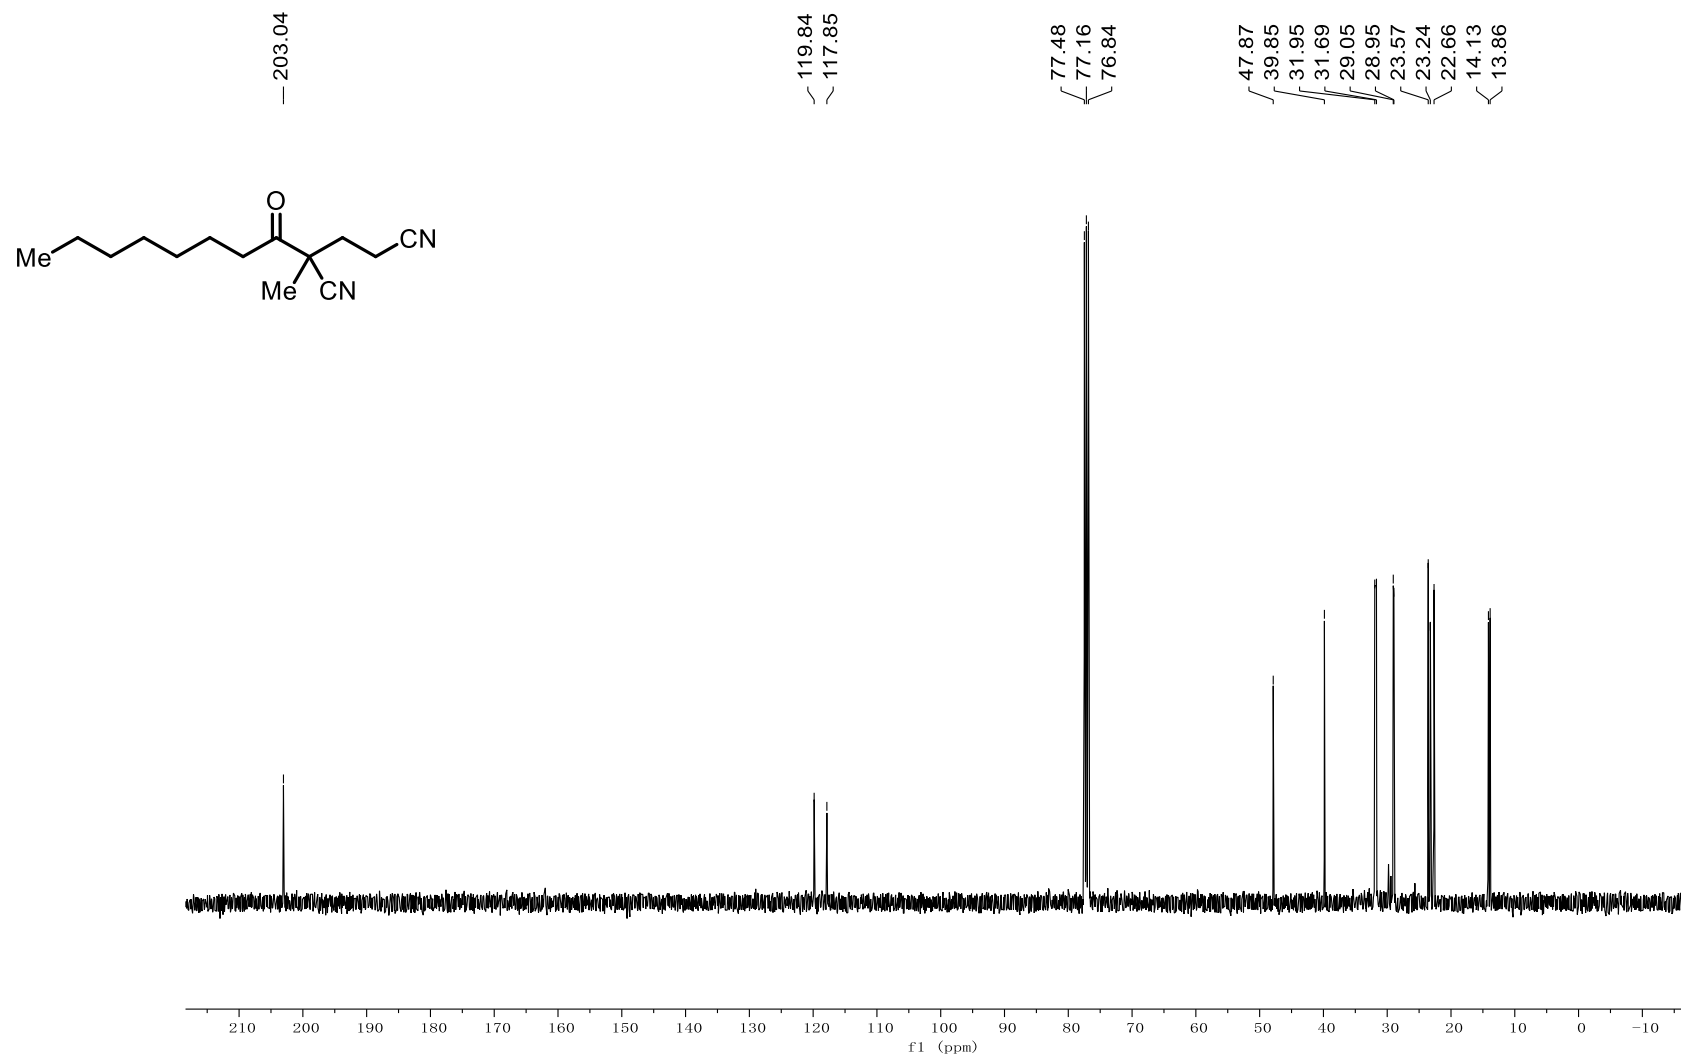

**<sup>1</sup>H NMR (400 MHz, CDCl<sub>3</sub>) spectrum of 2-(4-(Benzyloxy)butanoyl)-2-methylpentanedinitrile (64)**

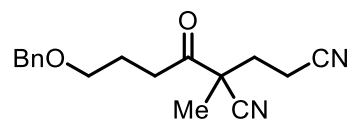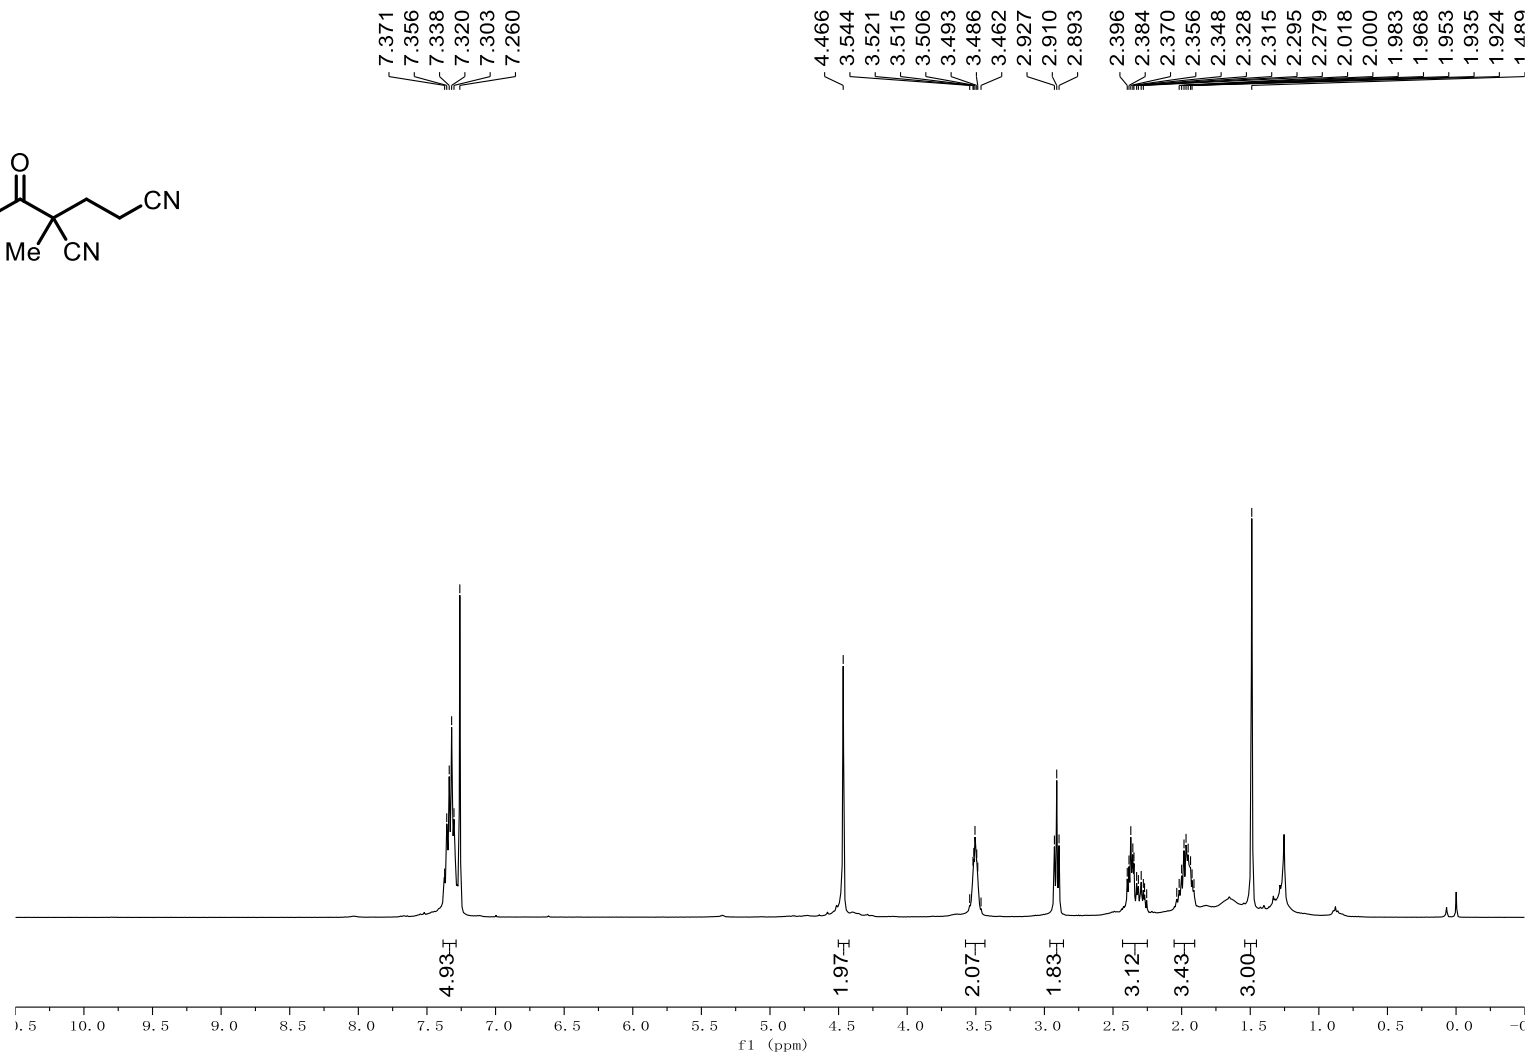

<sup>13</sup>C NMR (100 MHz, CDCl<sub>3</sub>) spectrum of 2-(4-(Benzyloxy)butanoyl)-2-methylpentanedinitrile (64)

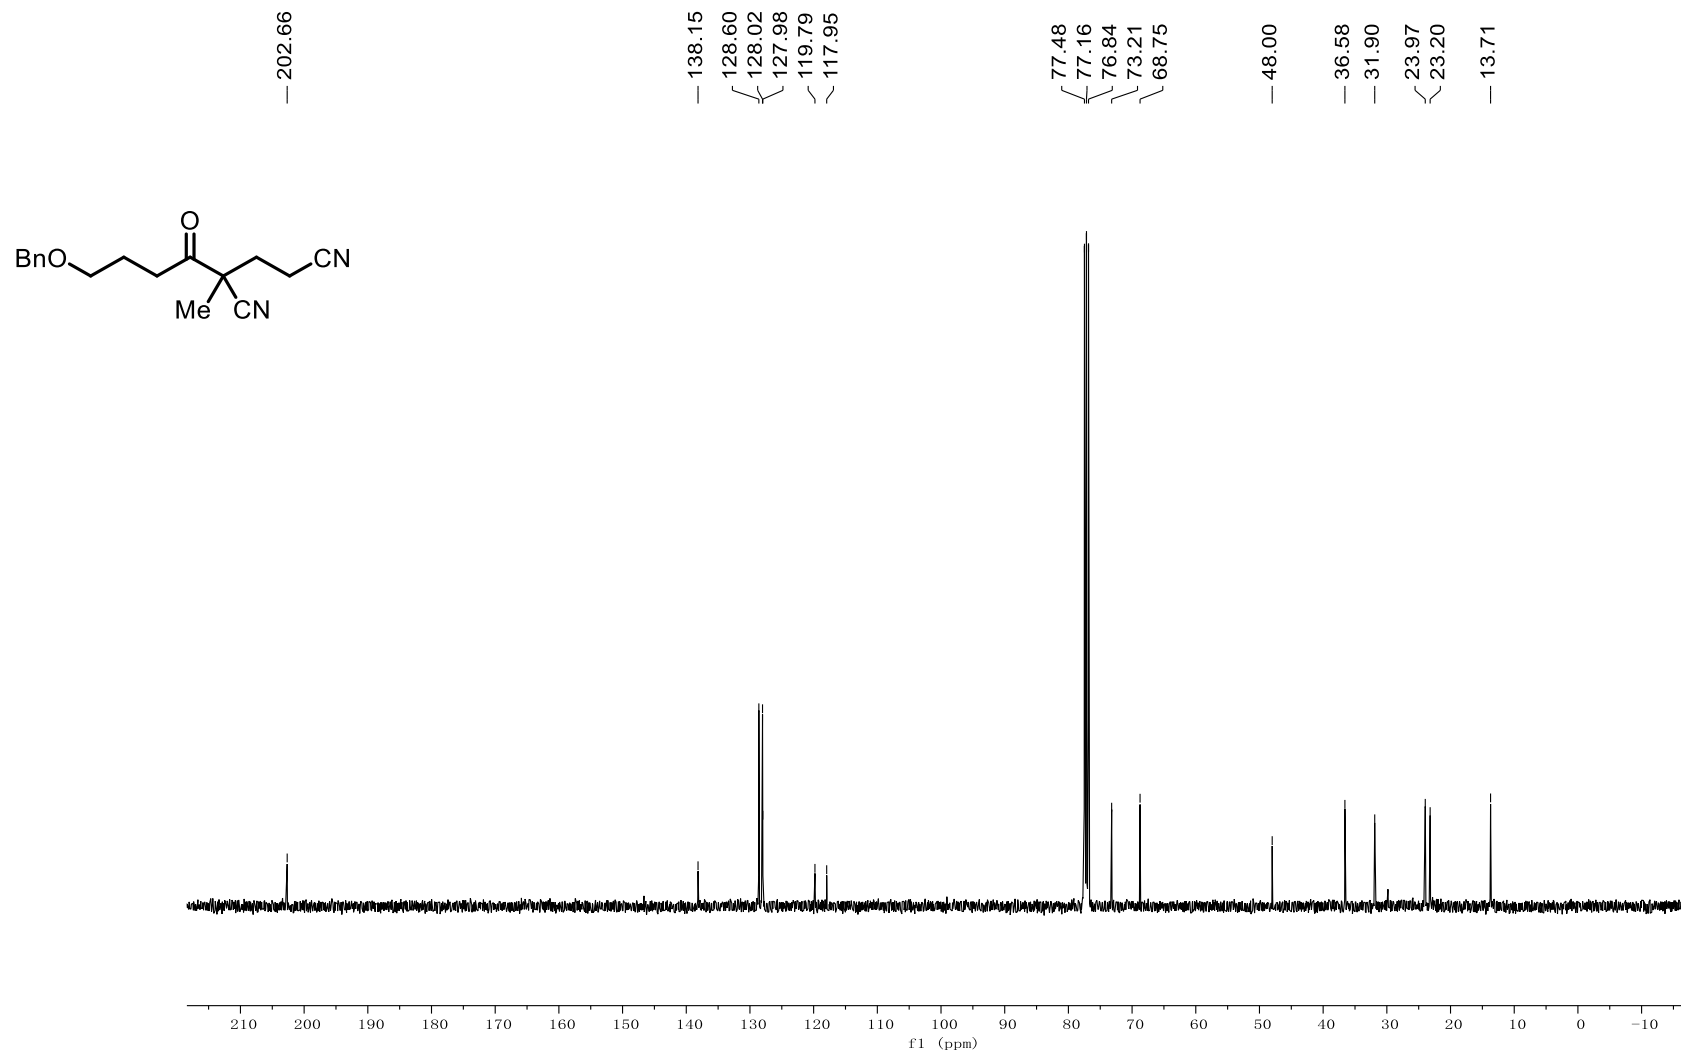

<sup>1</sup>H NMR (400 MHz, CDCl<sub>3</sub>) spectrum of 2-Methyl-2-(undec-10-enoyl)pentanedinitrile (65)

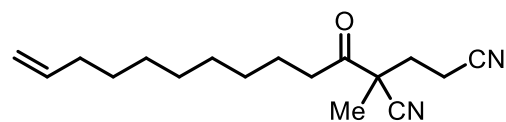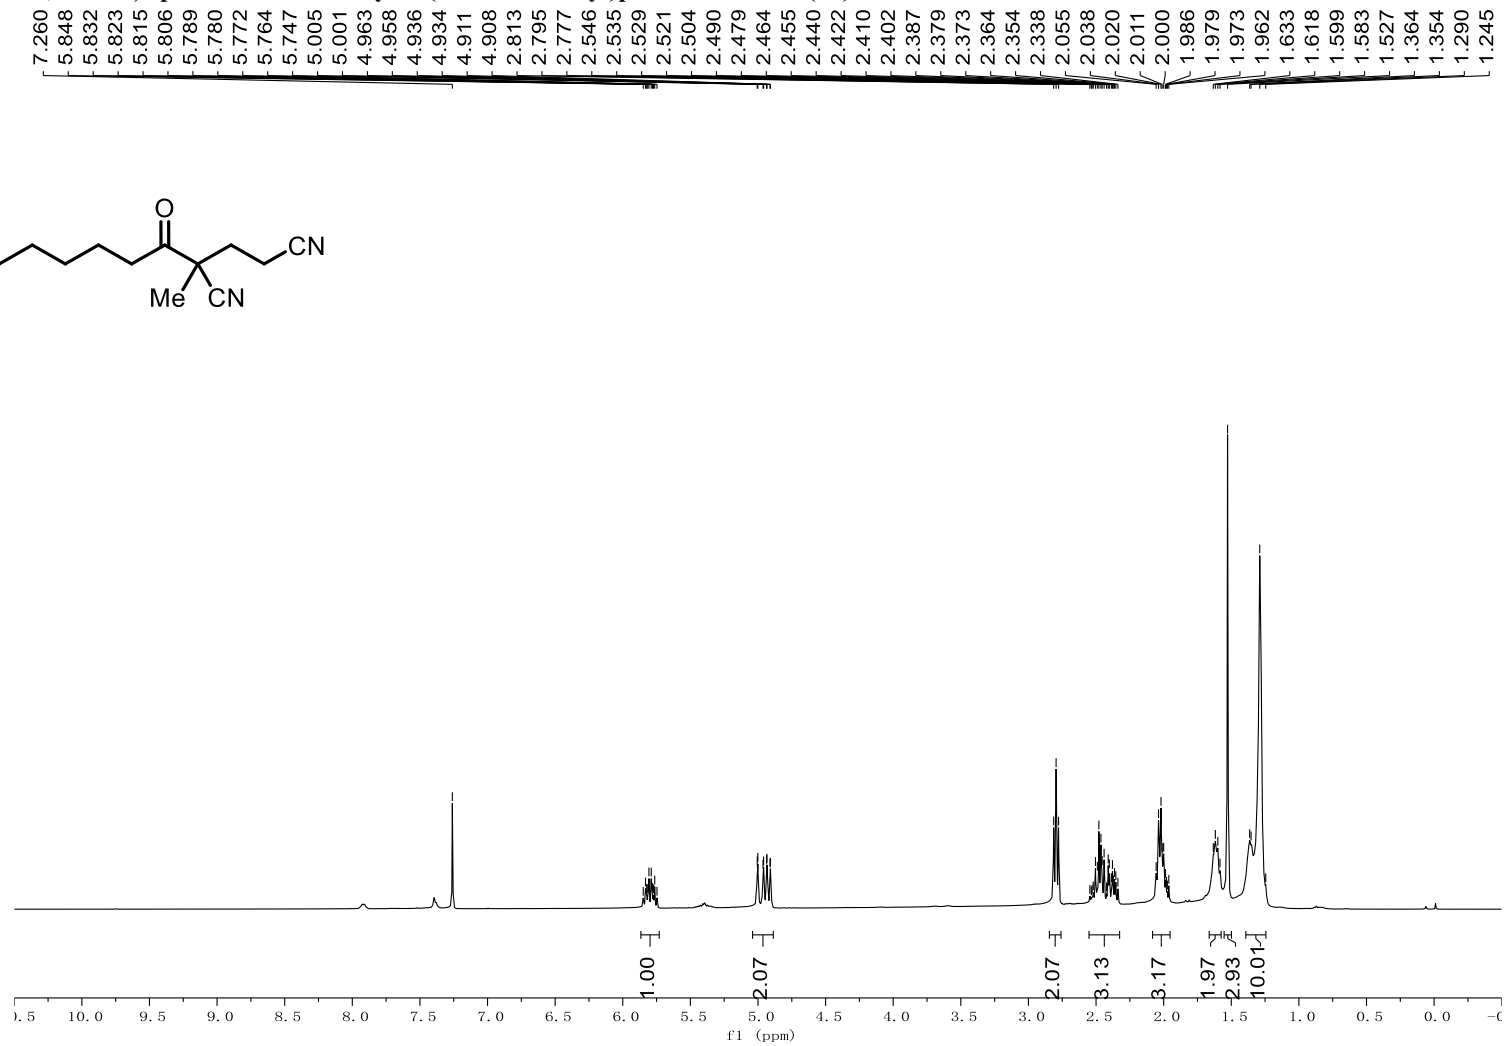

<sup>13</sup>C NMR (100 MHz, CDCl<sub>3</sub>) spectrum of 2-Methyl-2-(undec-10-enyl)pentanedinitrile (65)

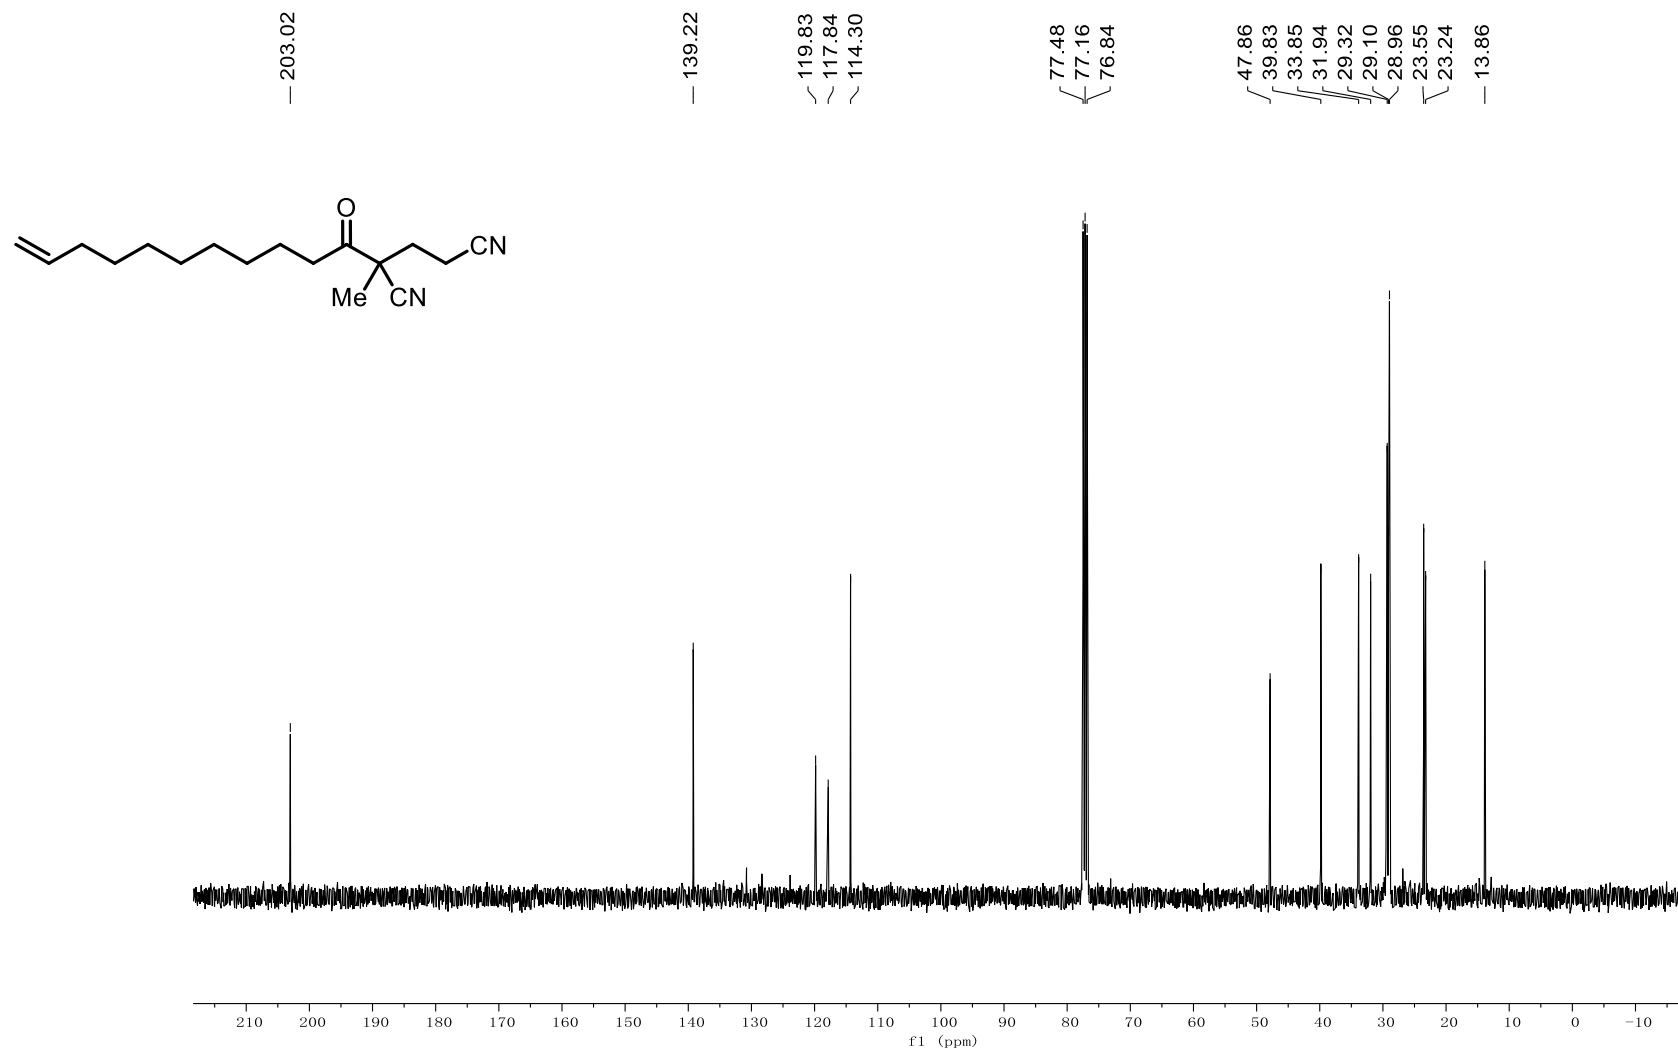

<sup>1</sup>H NMR (400 MHz, CDCl<sub>3</sub>) spectrum of 2-(Cyclopropanecarbonyl)-2-methylpentanedinitrile (66)

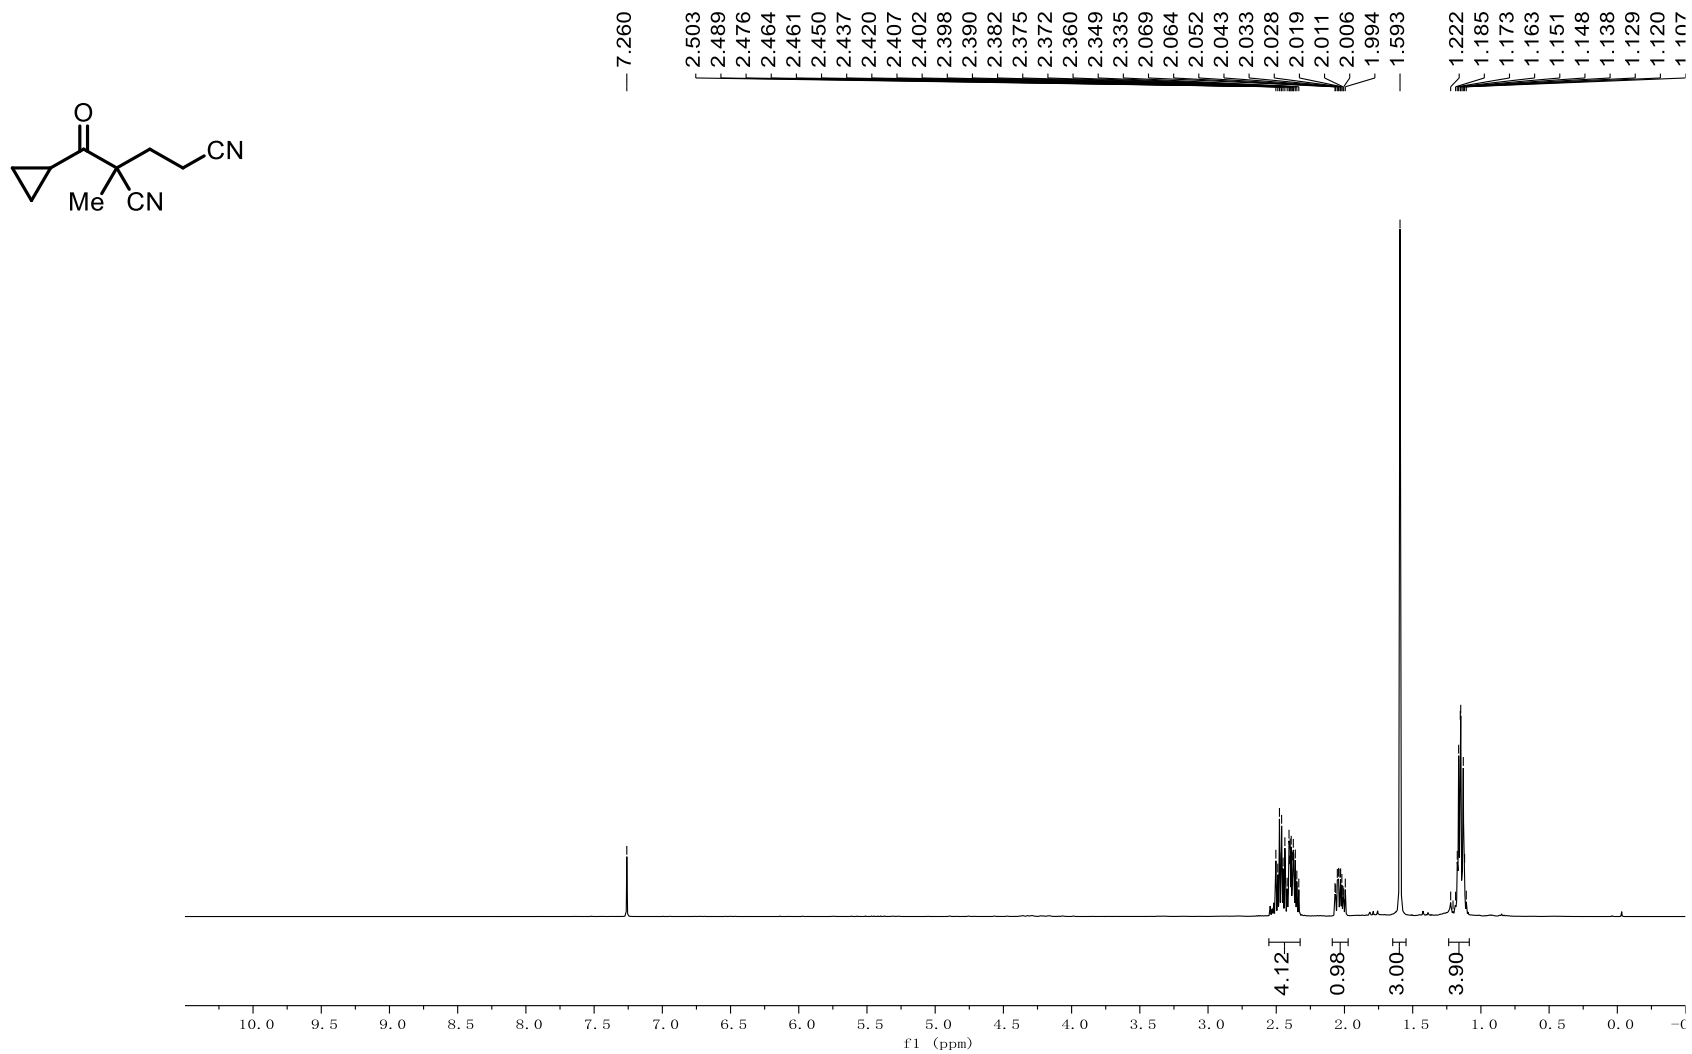

<sup>13</sup>C NMR (100 MHz, CDCl<sub>3</sub>) spectrum of 2-(Cyclopropanecarbonyl)-2-methylpentanedinitrile (66)

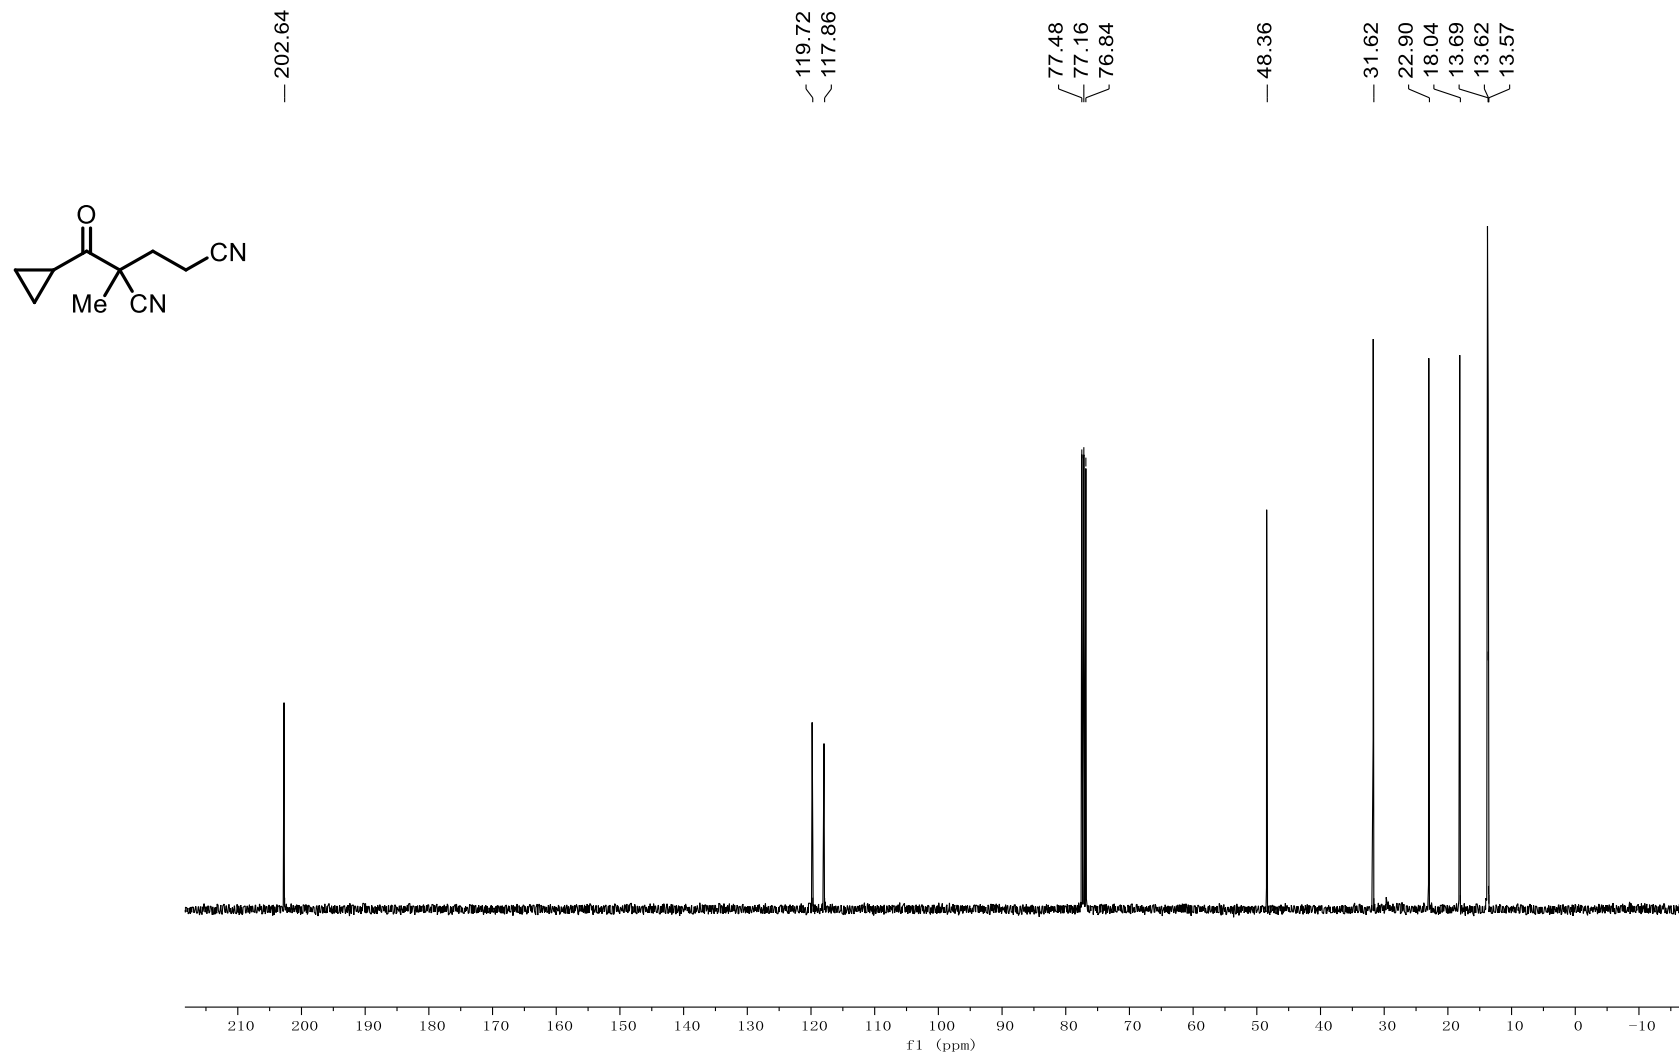

<sup>1</sup>H NMR (400 MHz, CDCl<sub>3</sub>) spectrum of 3-([1,1'-Biphenyl]-4-yl)-3-hydroxy-2-methylpropanenitrile (67)

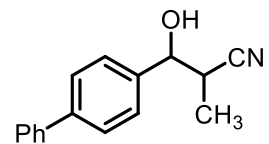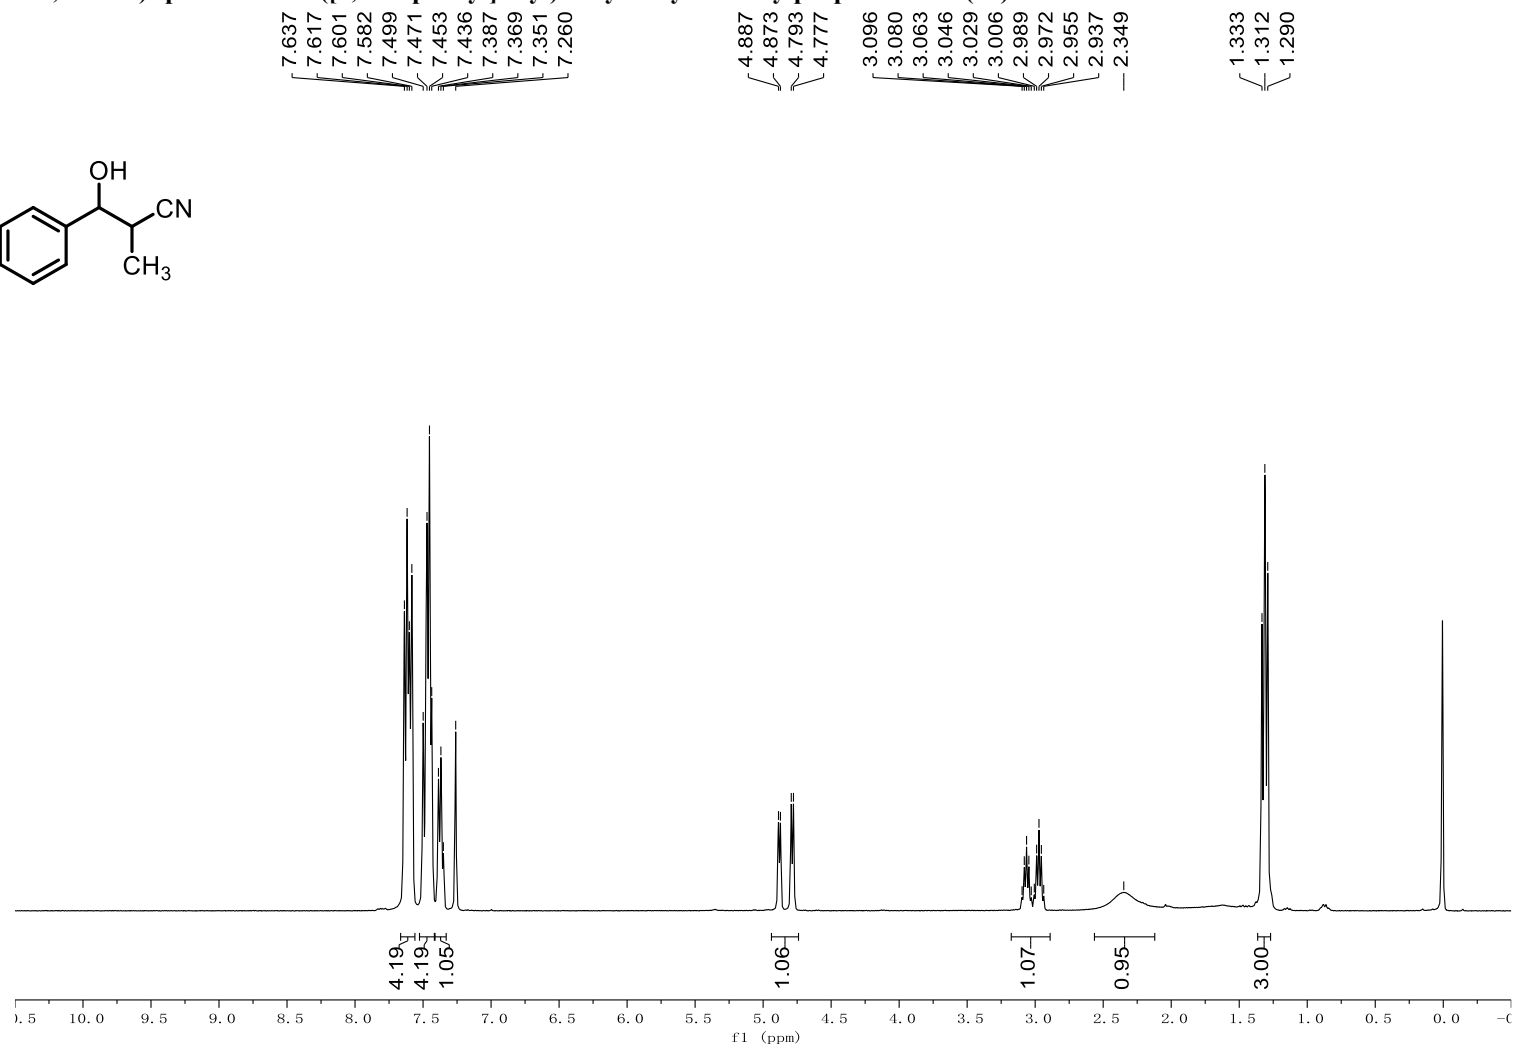

<sup>13</sup>C NMR (100 MHz, CDCl<sub>3</sub>) spectrum of 3-([1,1'-Biphenyl]-4-yl)-3-hydroxy-2-methylpropanenitrile (67)

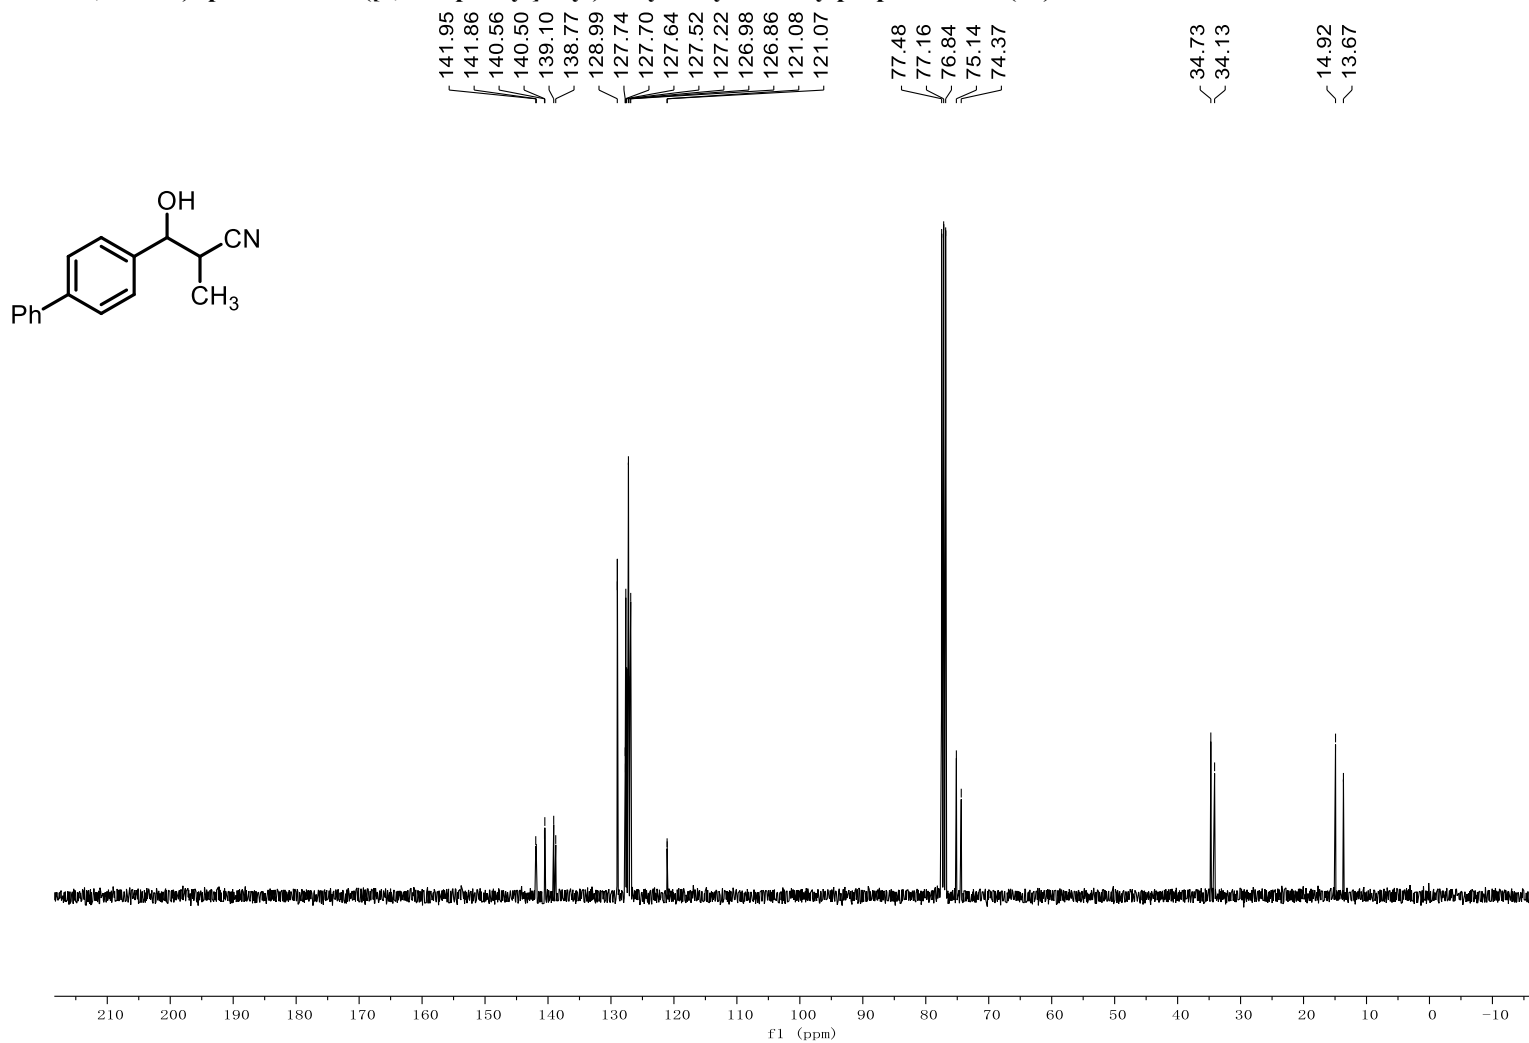

<sup>1</sup>H NMR (400 MHz, CDCl<sub>3</sub>) spectrum of 1-([1,1'-Biphenyl]-4-yl)-3-amino-2-methylpropan-1-ol (68)

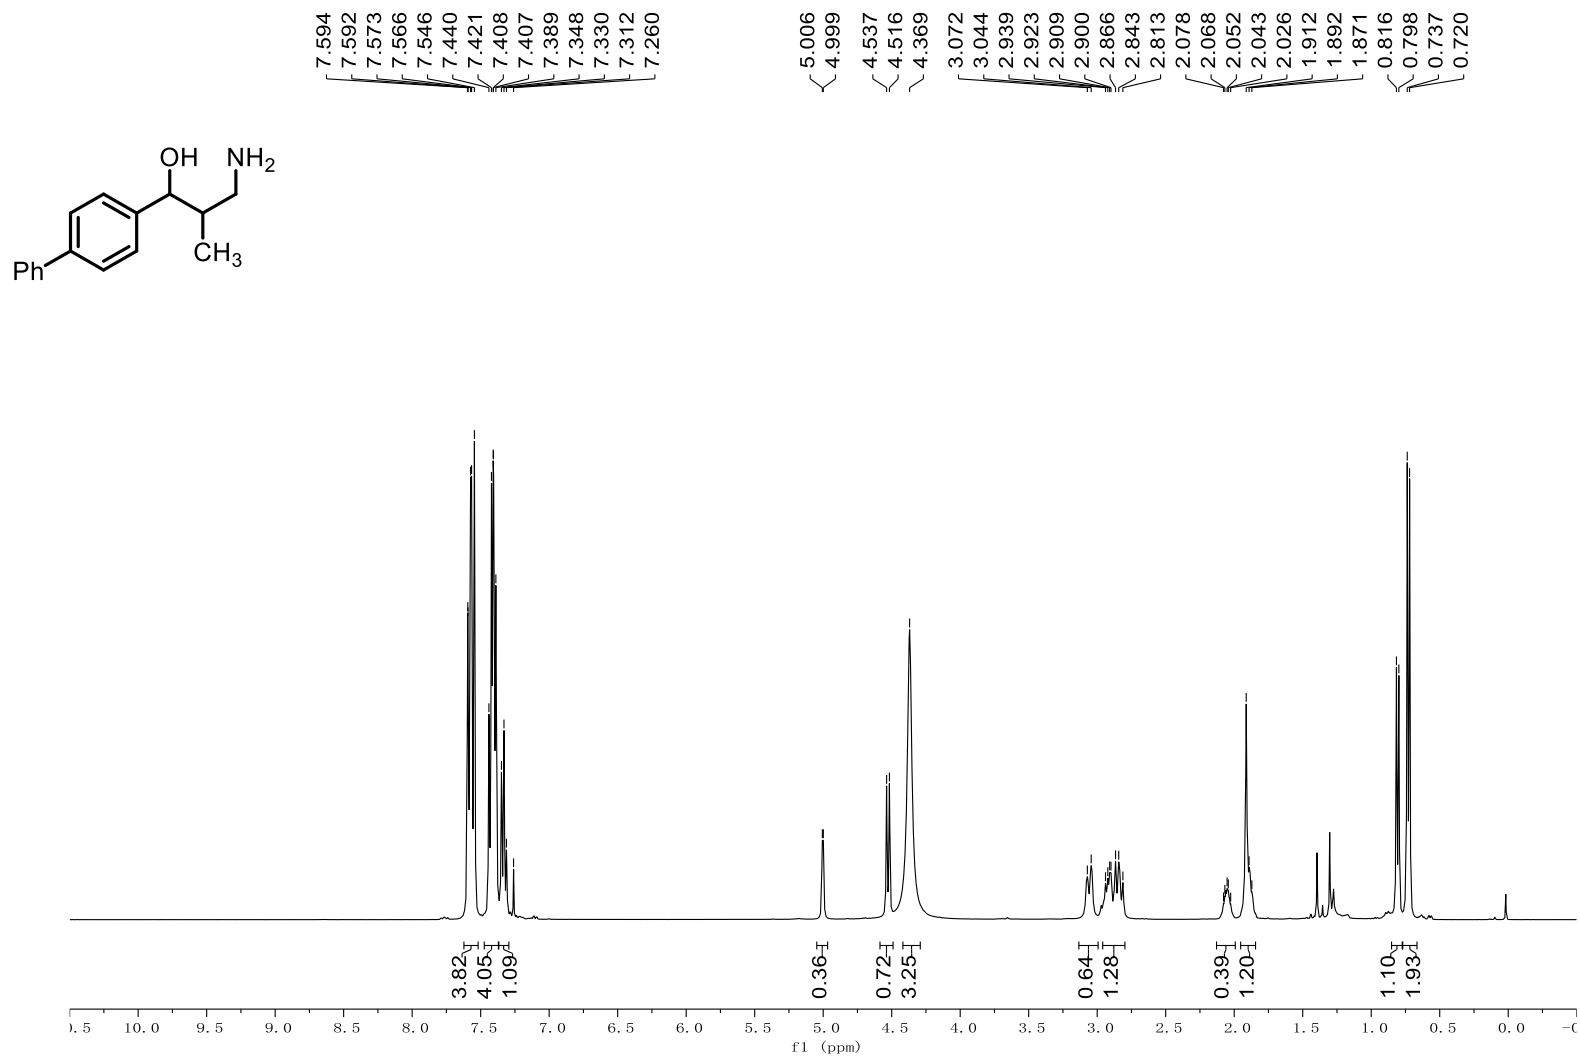

<sup>13</sup>C NMR (100 MHz, CDCl<sub>3</sub>) spectrum of 1-([1,1'-Biphenyl]-4-yl)-3-amino-2-methylpropan-1-ol (68)

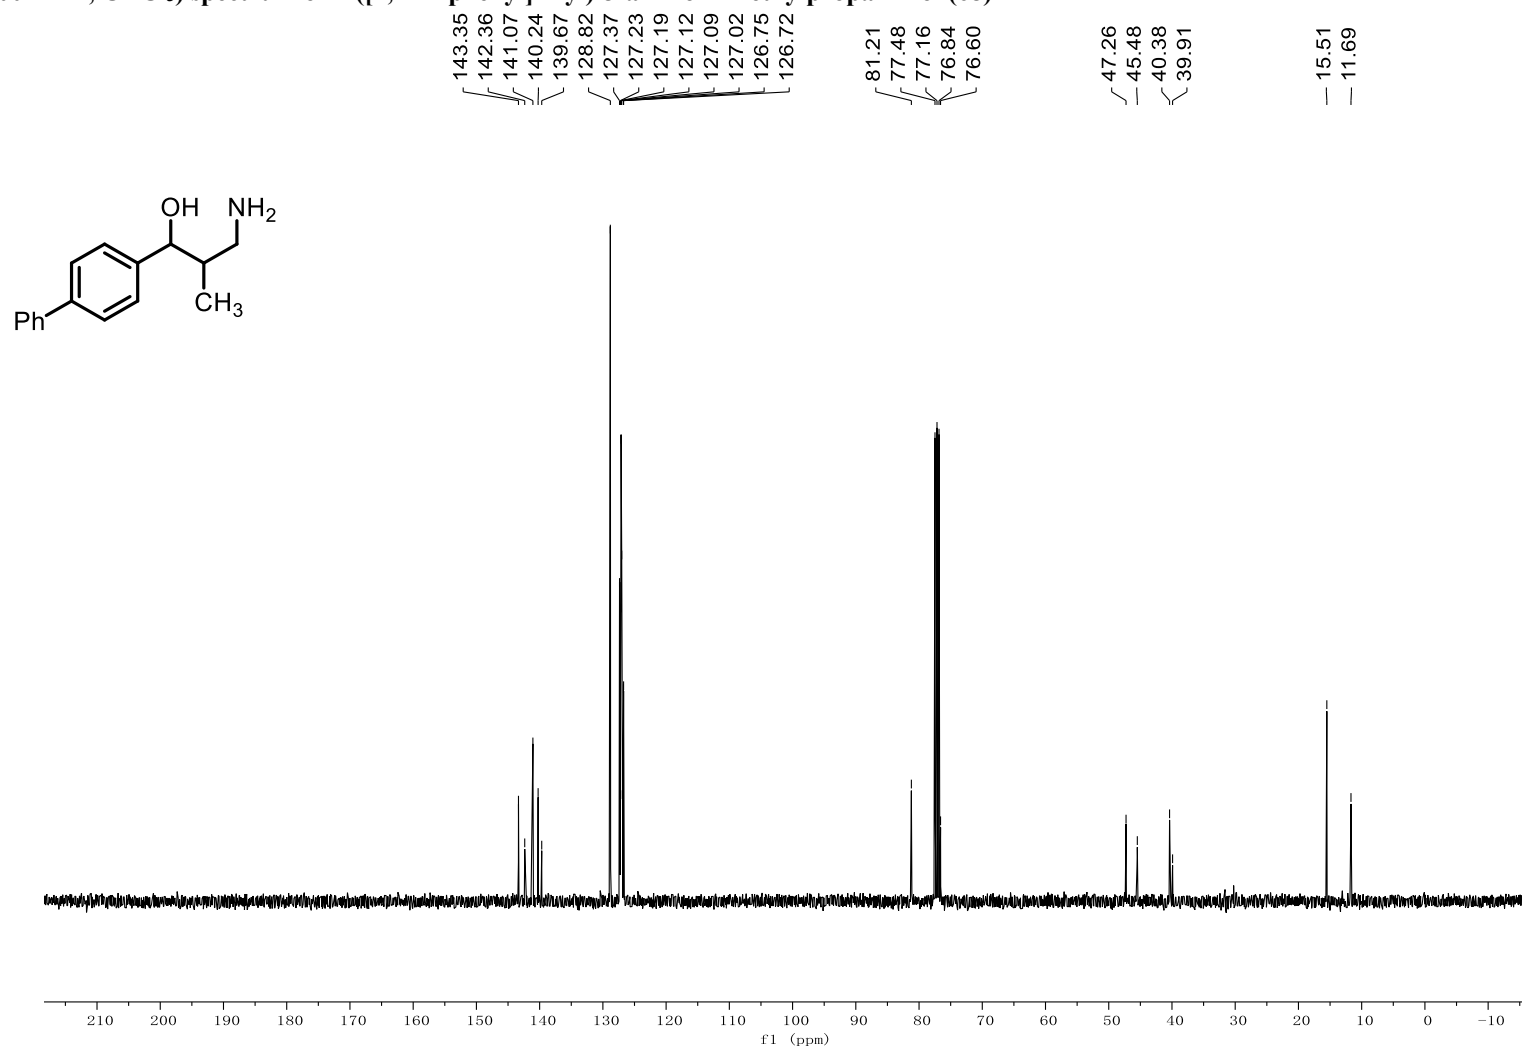

<sup>1</sup>H NMR (400 MHz, CDCl<sub>3</sub>) spectrum of 3-([1,1'-Biphenyl]-4-yl)-3-hydroxy-2-methylpropanamide (**69**) *Major isomer*

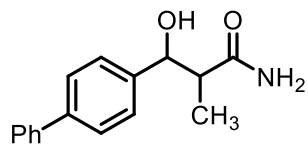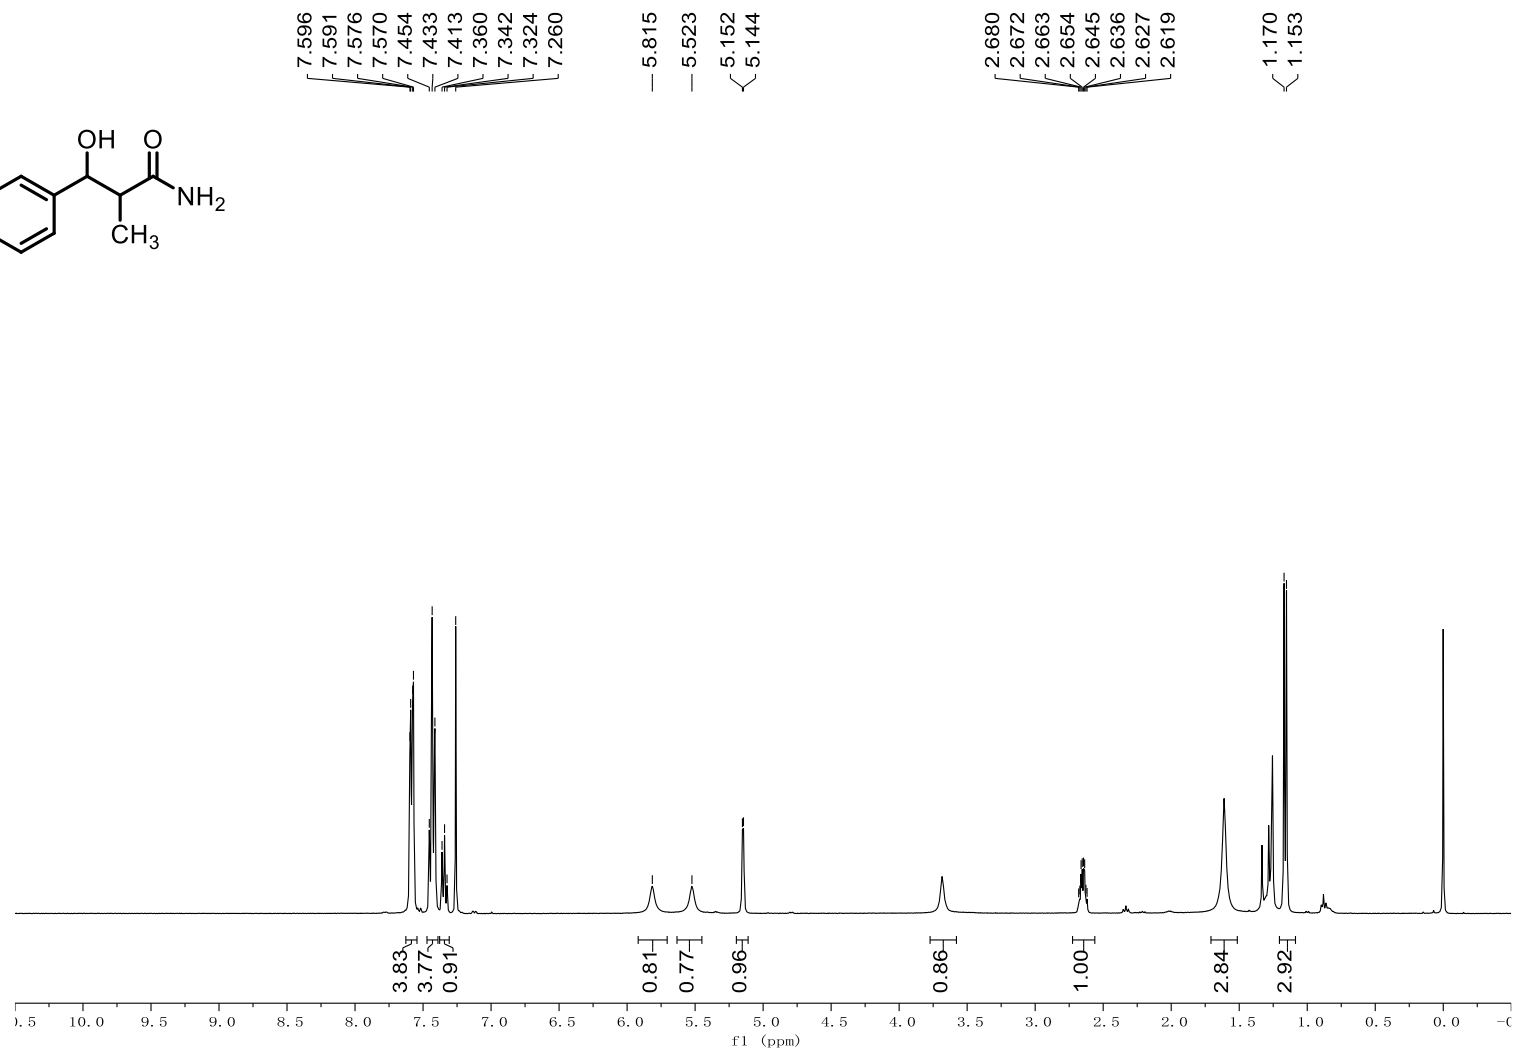

<sup>13</sup>C NMR (100 MHz, DMSO-*d*<sub>6</sub>) spectrum of 3-([1,1'-biphenyl]-4-yl)-3-hydroxy-2-methylpropanamide (69) *Major isomer*

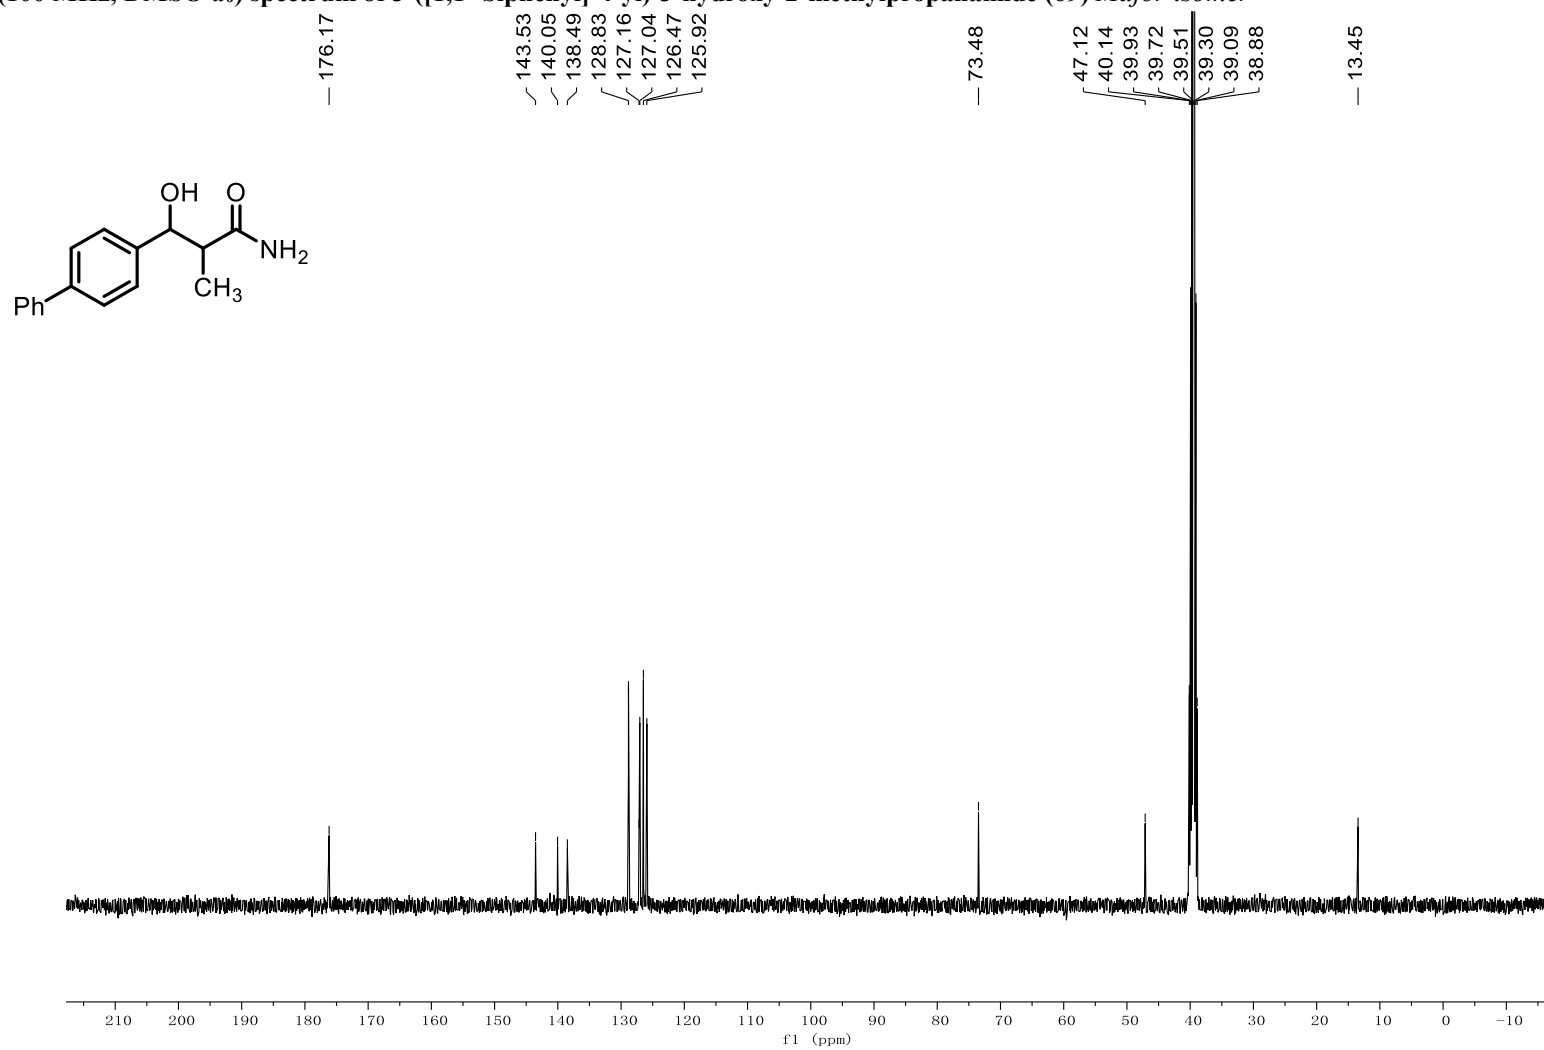

<sup>1</sup>H NMR (400 MHz, CDCl<sub>3</sub>) spectrum of 3-([1,1'-biphenyl]-4-yl)-3-hydroxy-2-methylpropanamide (69) *Minor isomer*

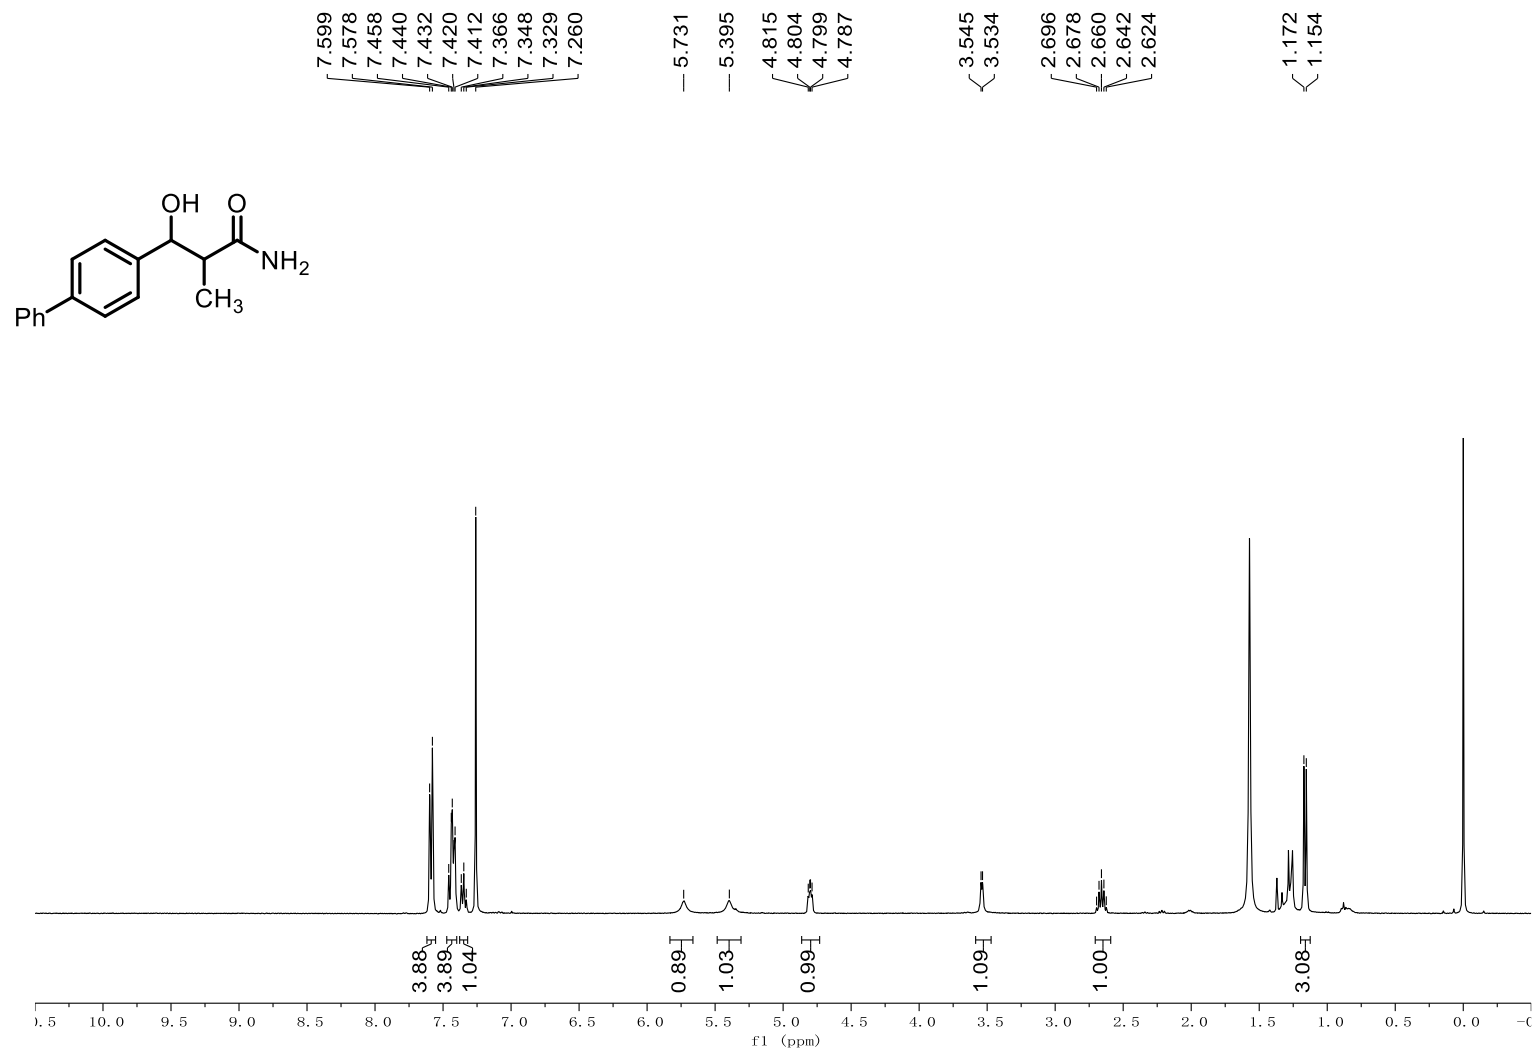

<sup>13</sup>C NMR (100 MHz, DMSO-*d*<sub>6</sub>) spectrum of 3-([1,1'-biphenyl]-4-yl)-3-hydroxy-2-methylpropanamide (69) *Minor isomer*

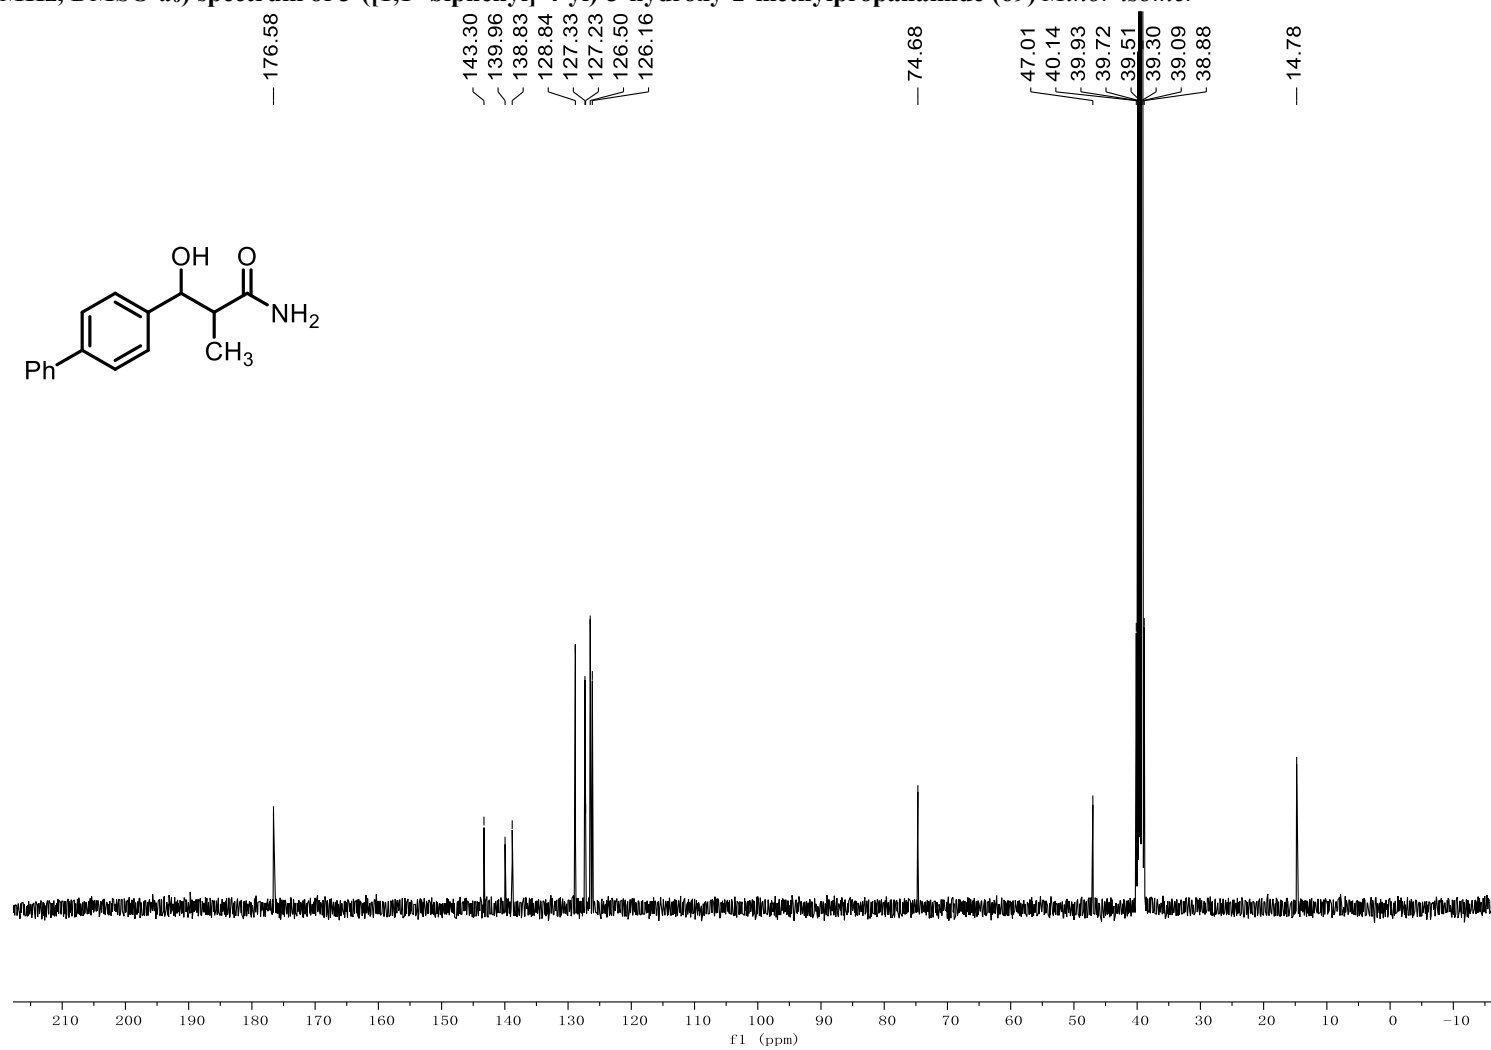

<sup>1</sup>H NMR (400 MHz, CDCl<sub>3</sub>) spectrum of 3-([1,1'-Biphenyl]-4-yl)-2-fluoro-2-methyl-3-oxopropanenitrile (70)

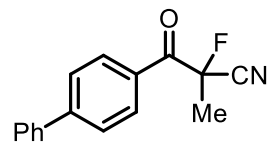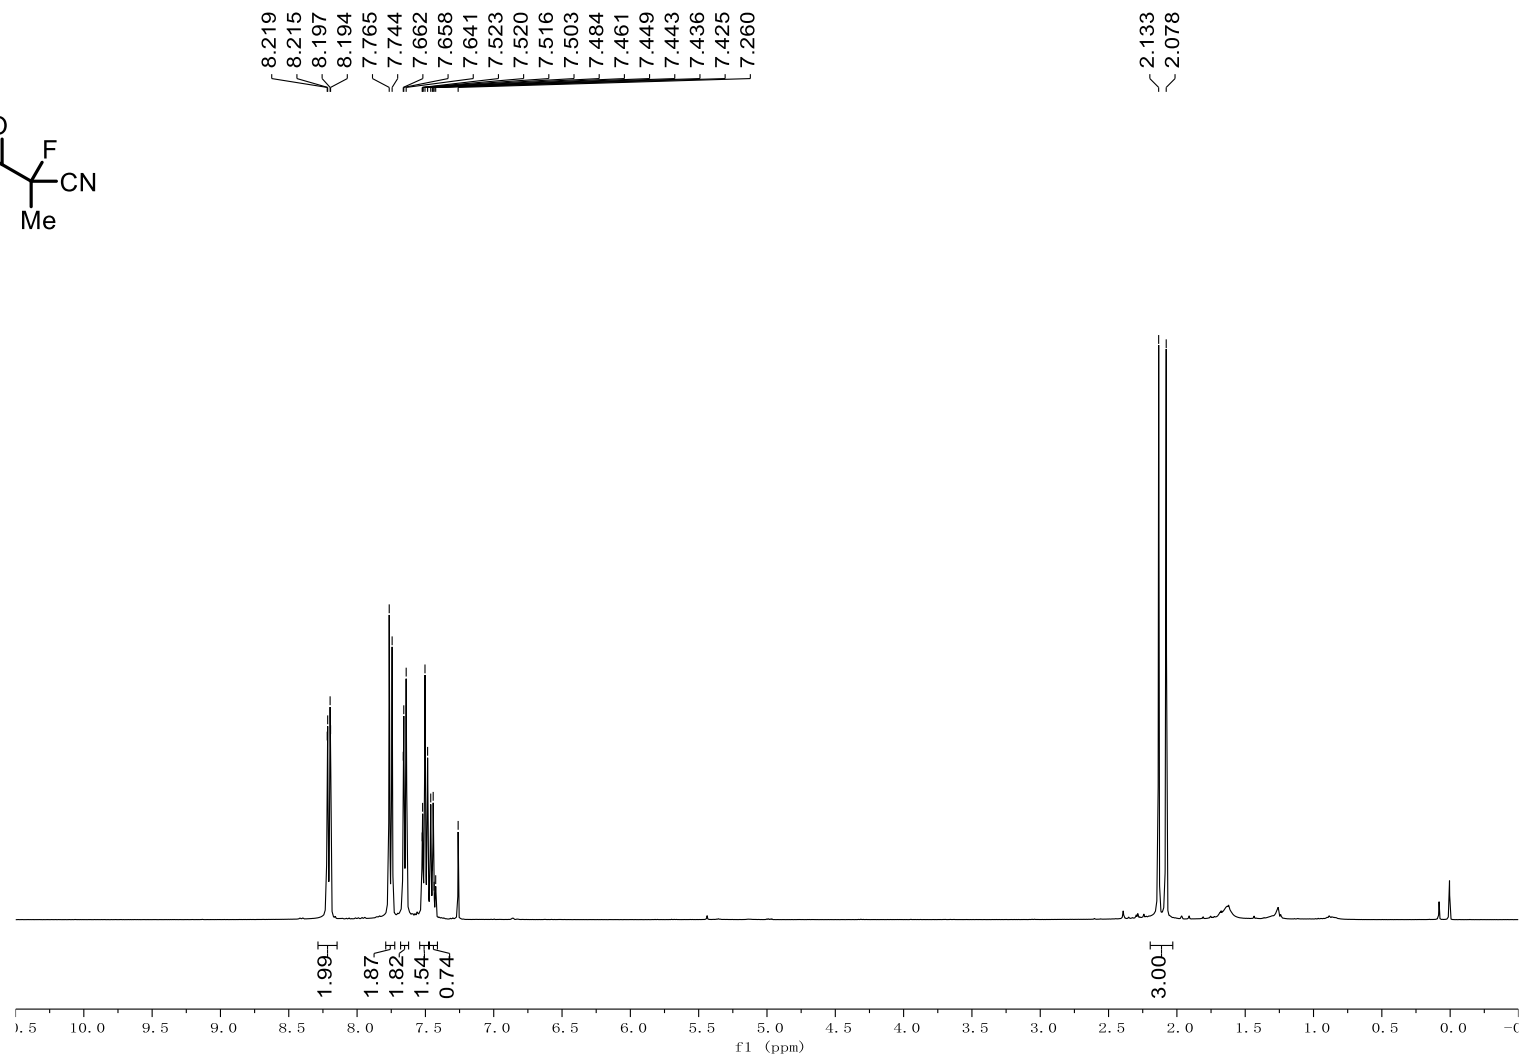

<sup>13</sup>C NMR (100 MHz, CDCl<sub>3</sub>) spectrum of 3-([1,1'-Biphenyl]-4-yl)-2-fluoro-2-methyl-3-oxopropanenitrile (70)

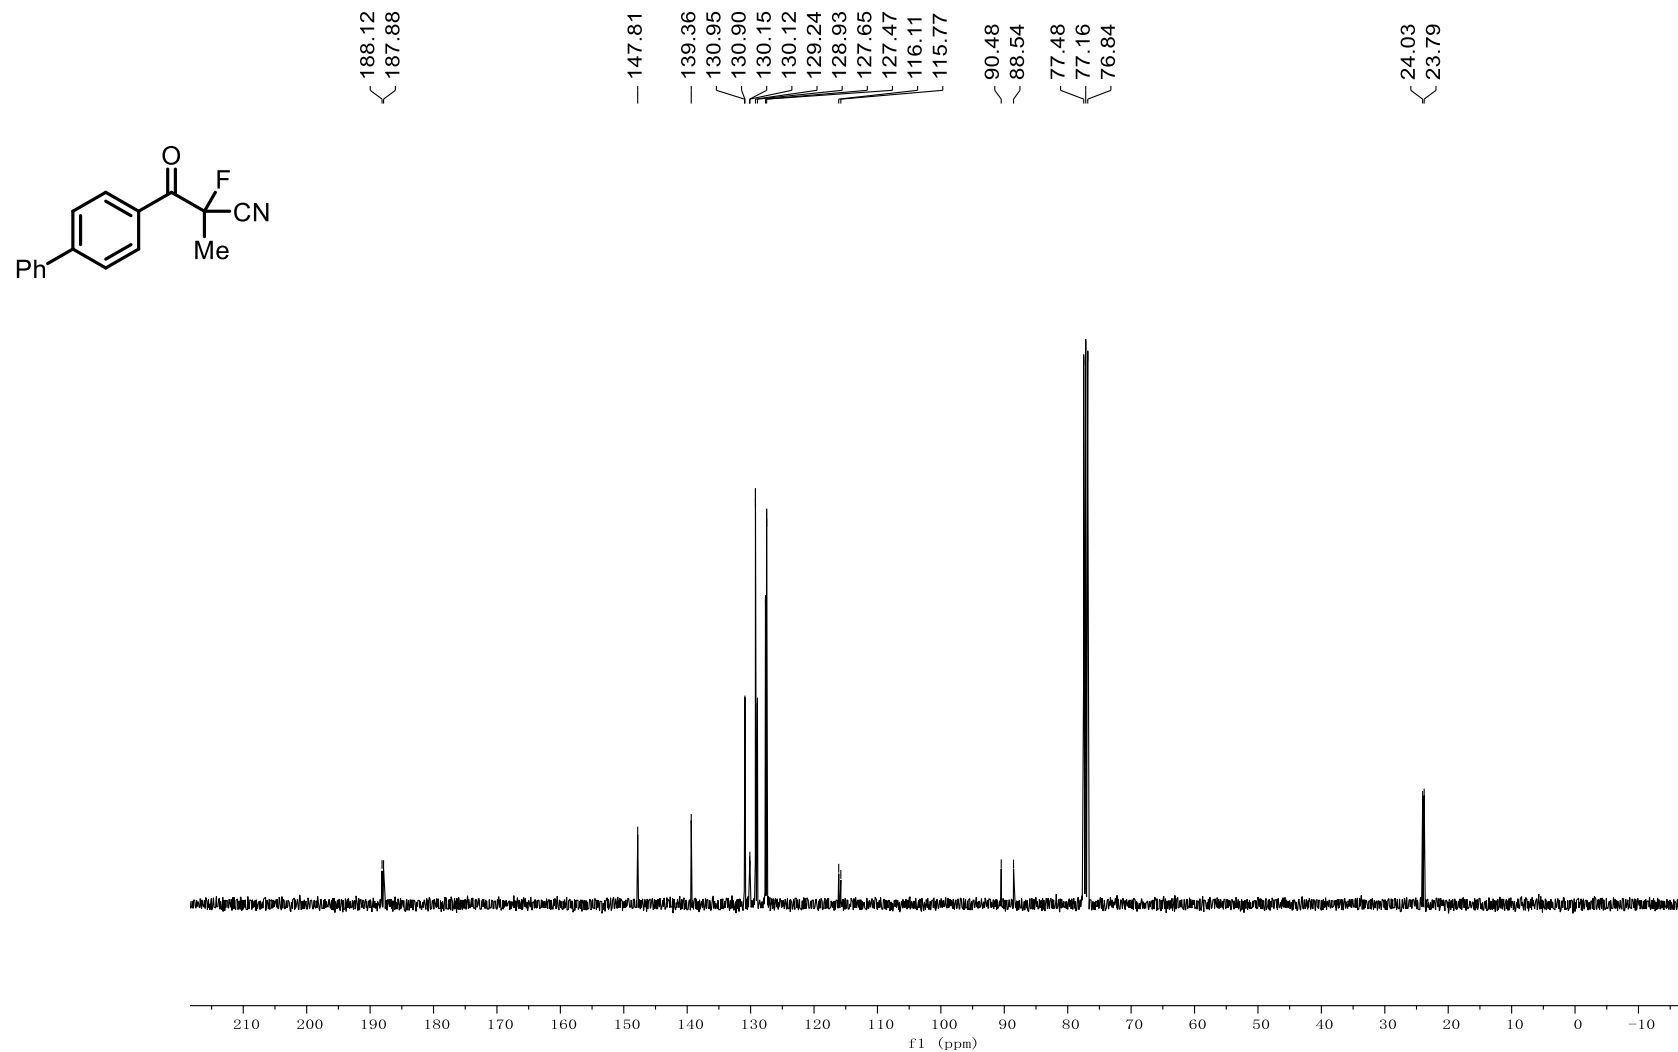

**$^{19}\text{F}$  NMR (376 MHz,  $\text{CDCl}_3$ ) spectrum of 3-([1,1'-Biphenyl]-4-yl)-2-fluoro-2-methyl-3-oxopropanenitrile (70)**

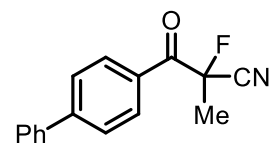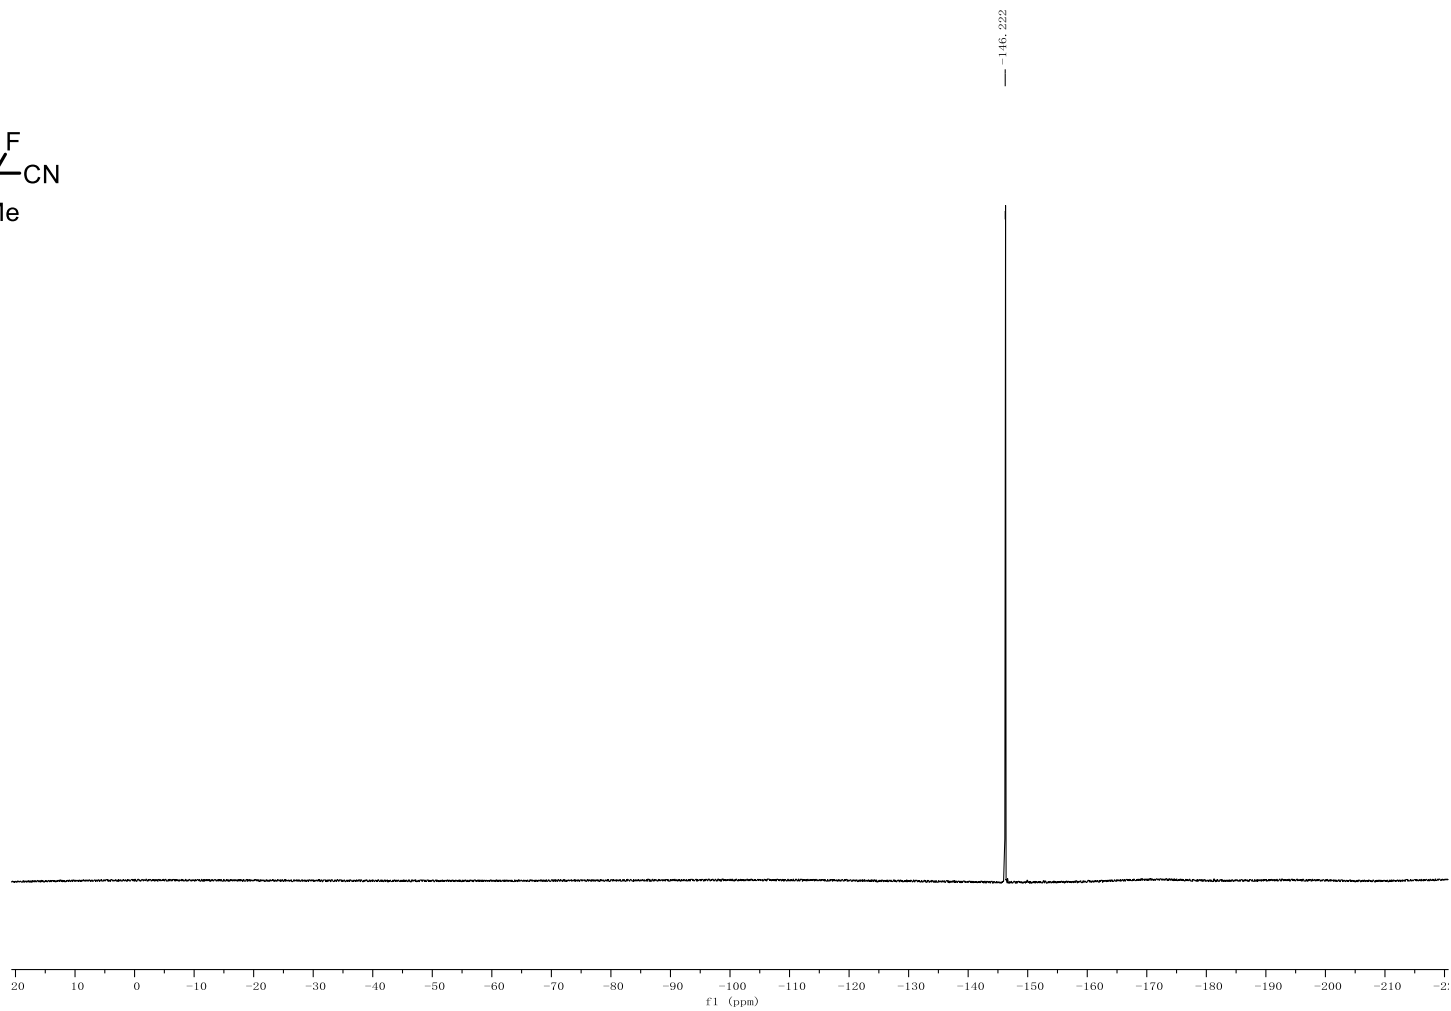

<sup>1</sup>H NMR (400 MHz, CDCl<sub>3</sub>) spectrum of 3-Methyl-2-phenylpent-1-ene-1,3,5-tricarbonitrile (71) *Major isomer*

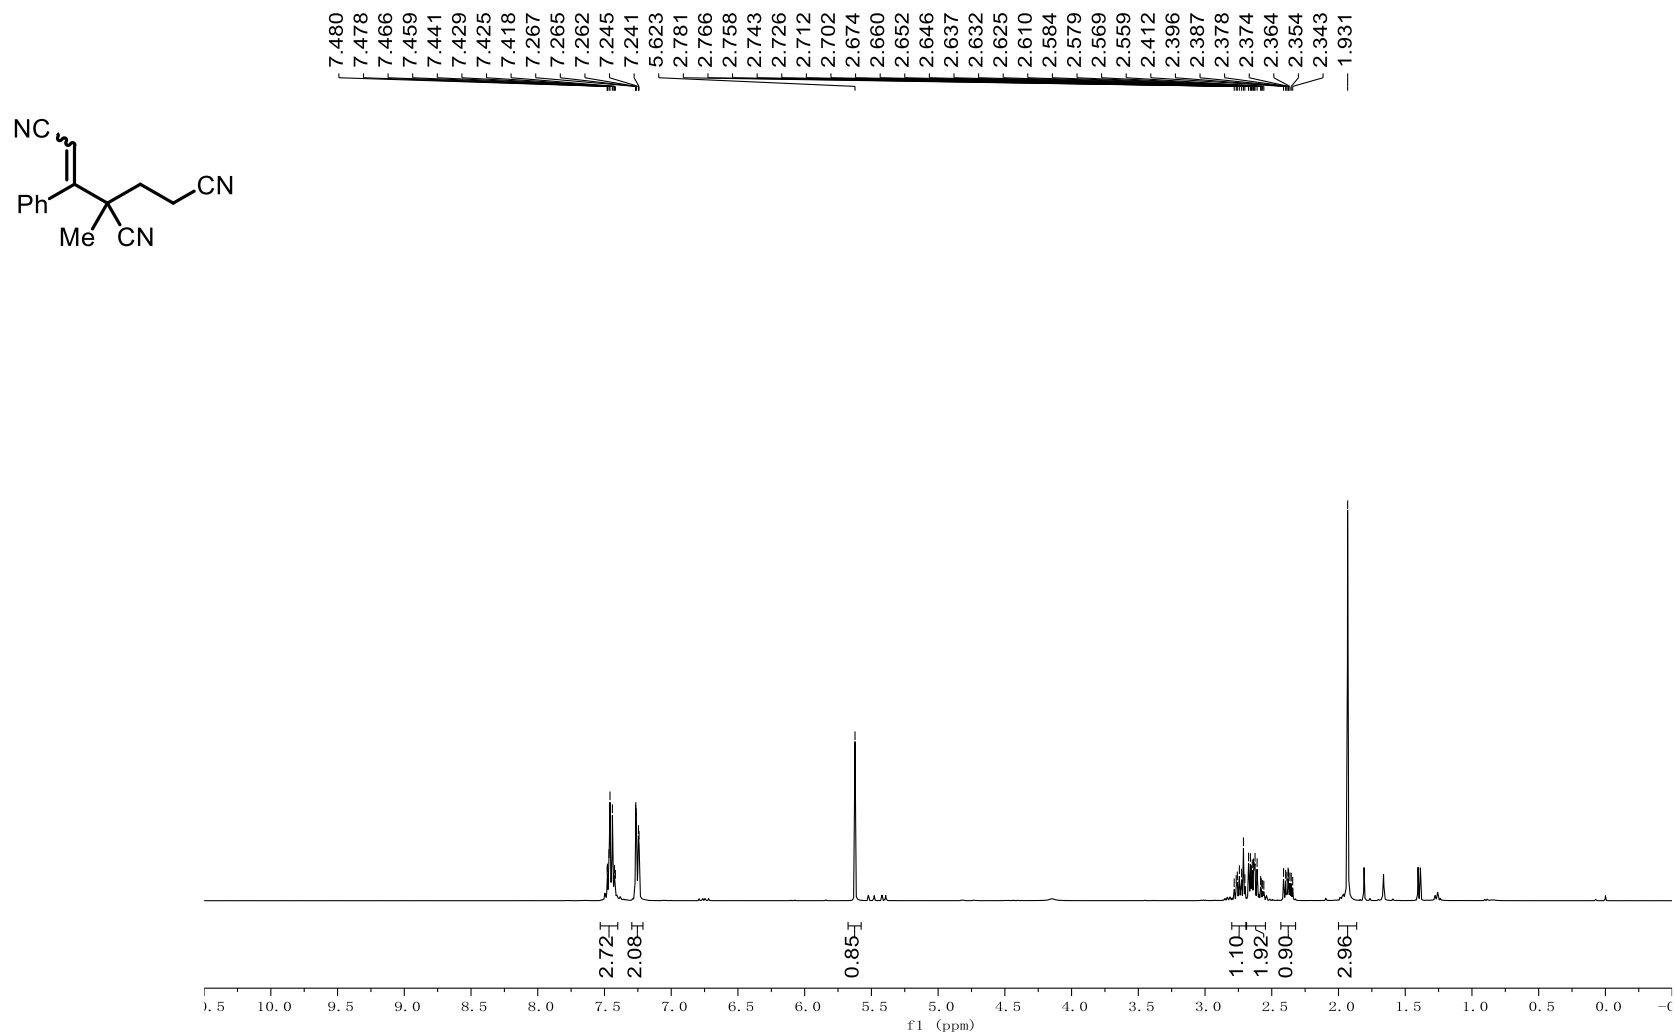

<sup>13</sup>C NMR (100 MHz, CDCl<sub>3</sub>) spectrum of 3-Methyl-2-phenylpent-1-ene-1,3,5-tricarbonitrile (71) *Major isomer*

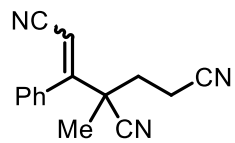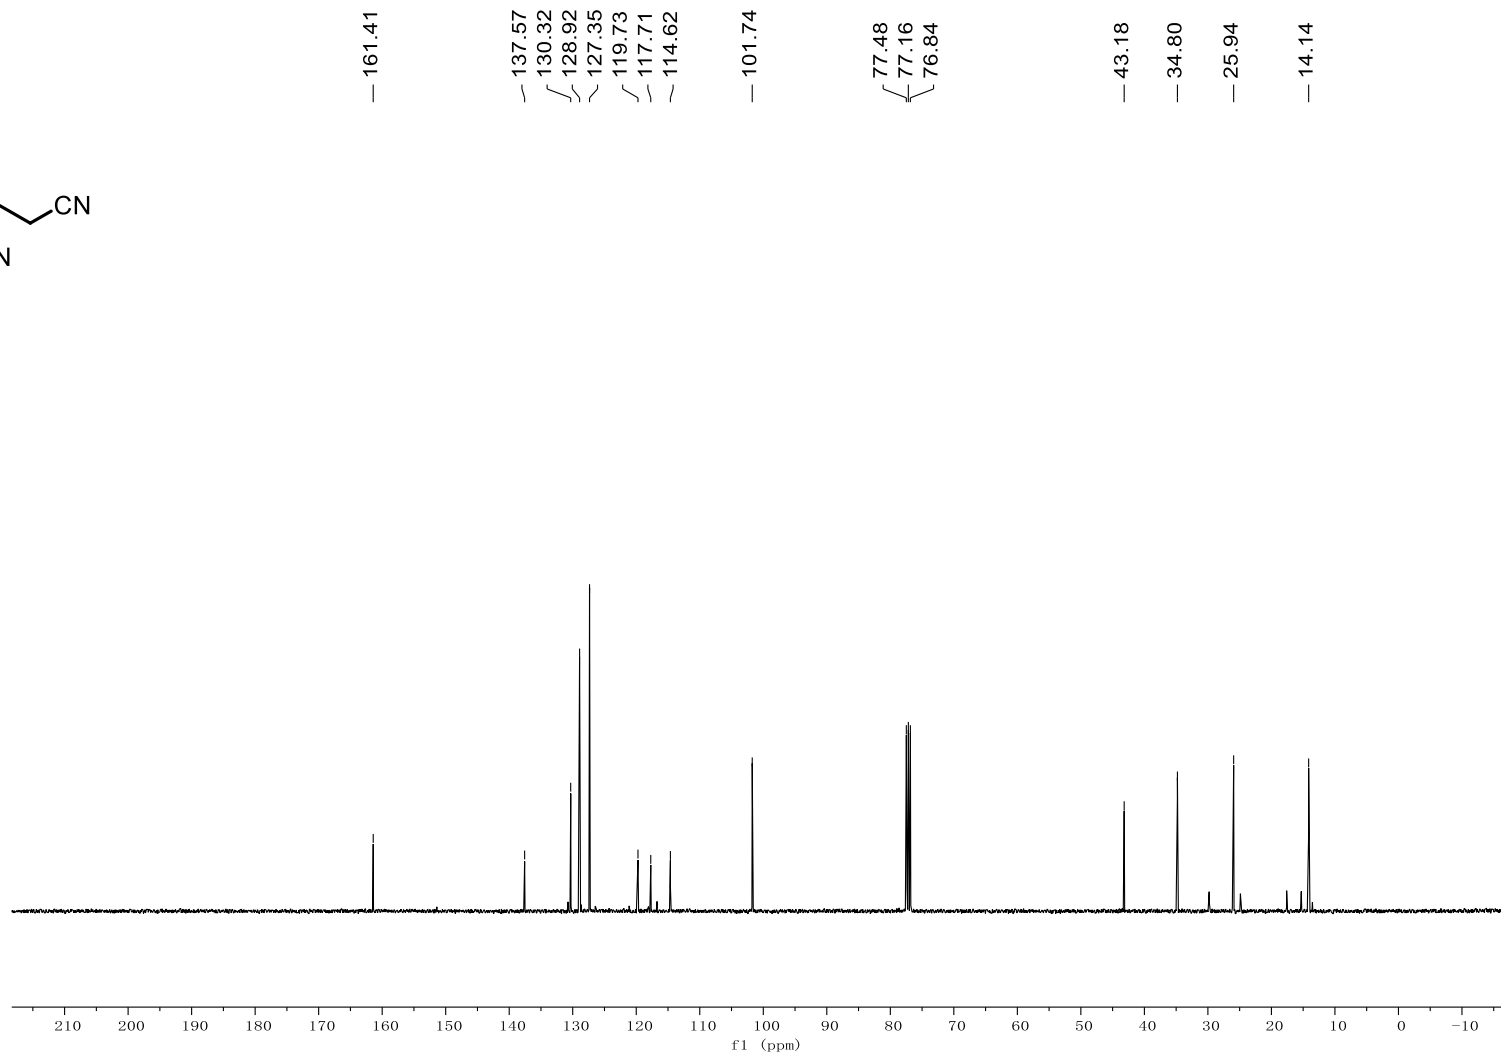

<sup>1</sup>H NMR (400 MHz, CDCl<sub>3</sub>) spectrum of 3-Methyl-2-phenylpent-1-ene-1,3,5-tricarbonitrile (71) *Minor isomer*

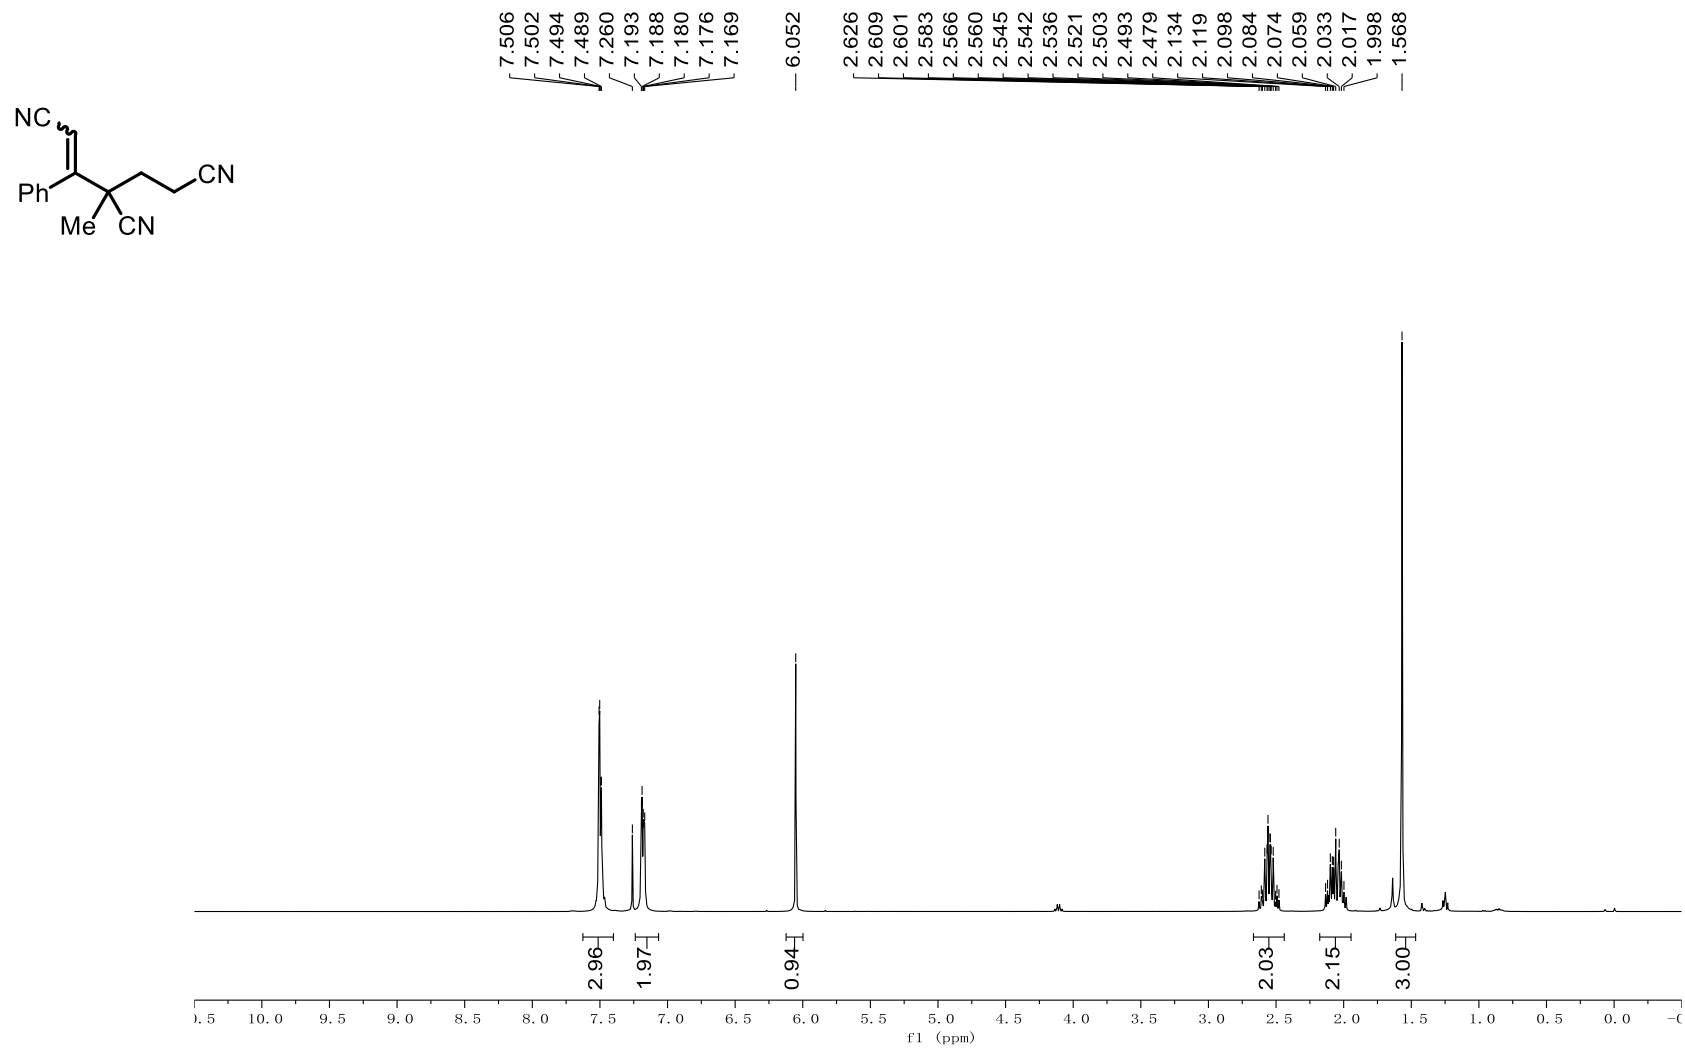

<sup>13</sup>C NMR (100 MHz, CDCl<sub>3</sub>) spectrum of 3-Methyl-2-phenylpent-1-ene-1,3,5-tricarbonitrile (71) *Minor isomer*

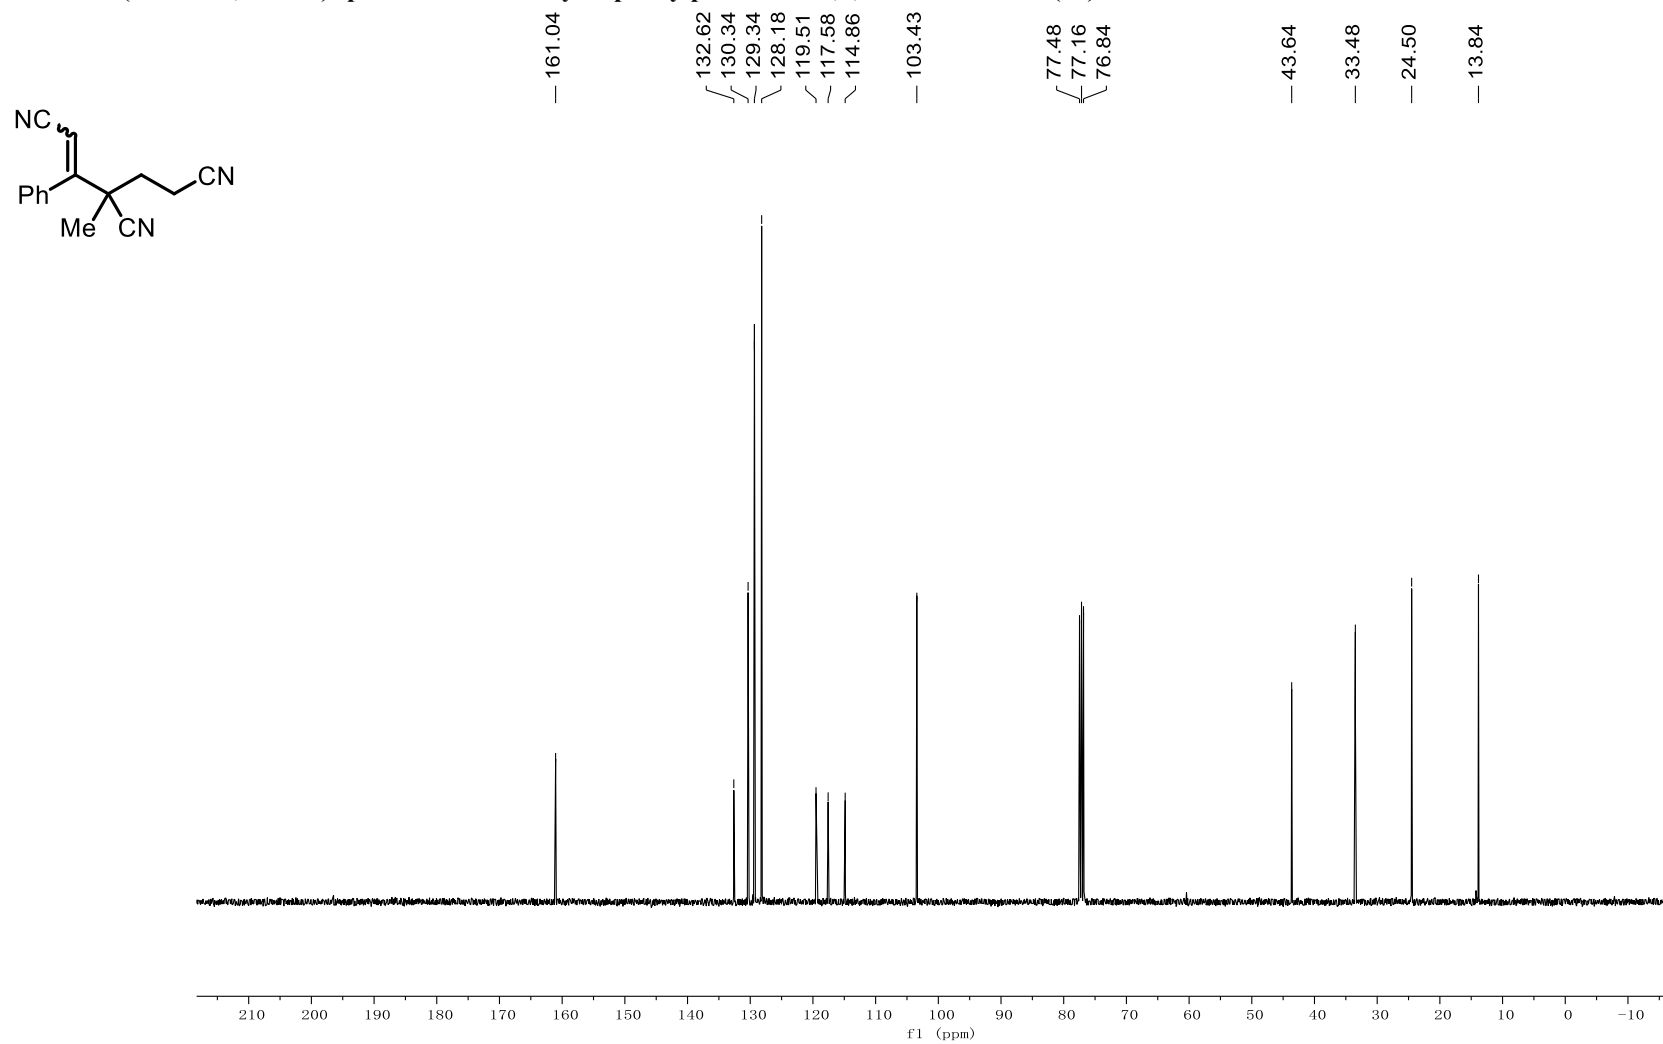

<sup>1</sup>H NMR (400 MHz, CDCl<sub>3</sub>) spectrum of 3-Benzoyl-3-methylpiperidine-2,6-dione (72)

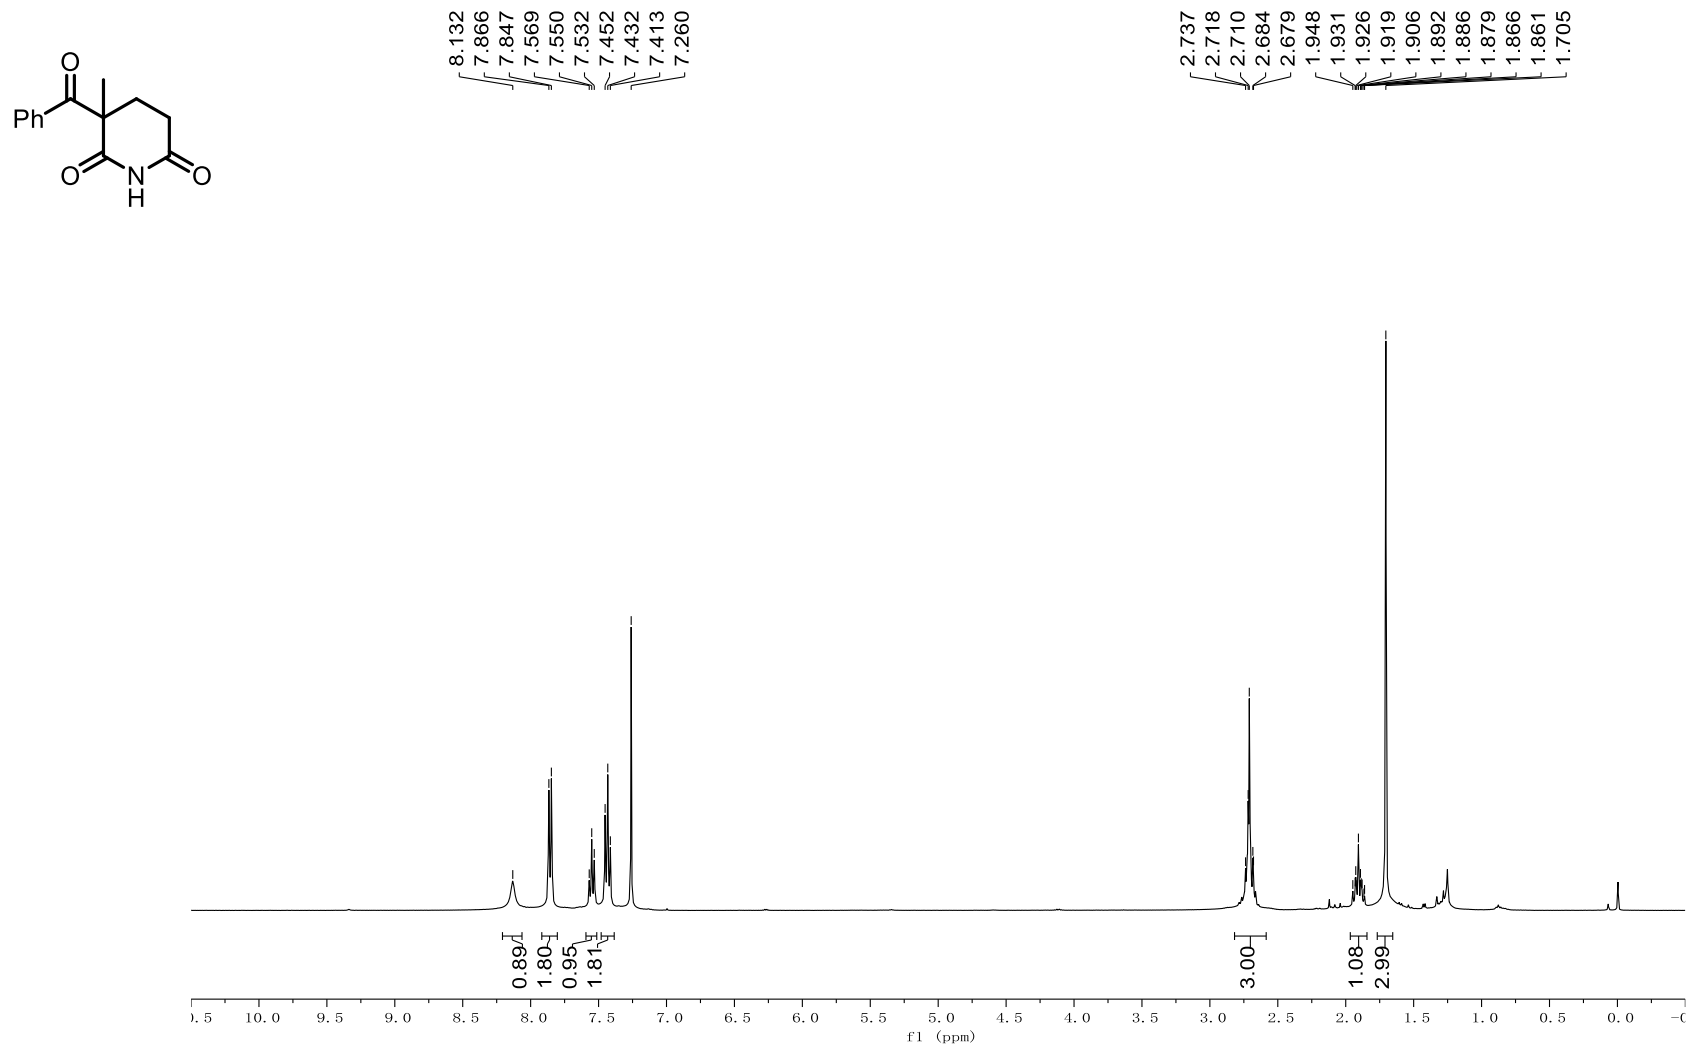

<sup>13</sup>C NMR (100 MHz, CDCl<sub>3</sub>) spectrum of 3-Benzoyl-3-methylpiperidine-2,6-dione (72)

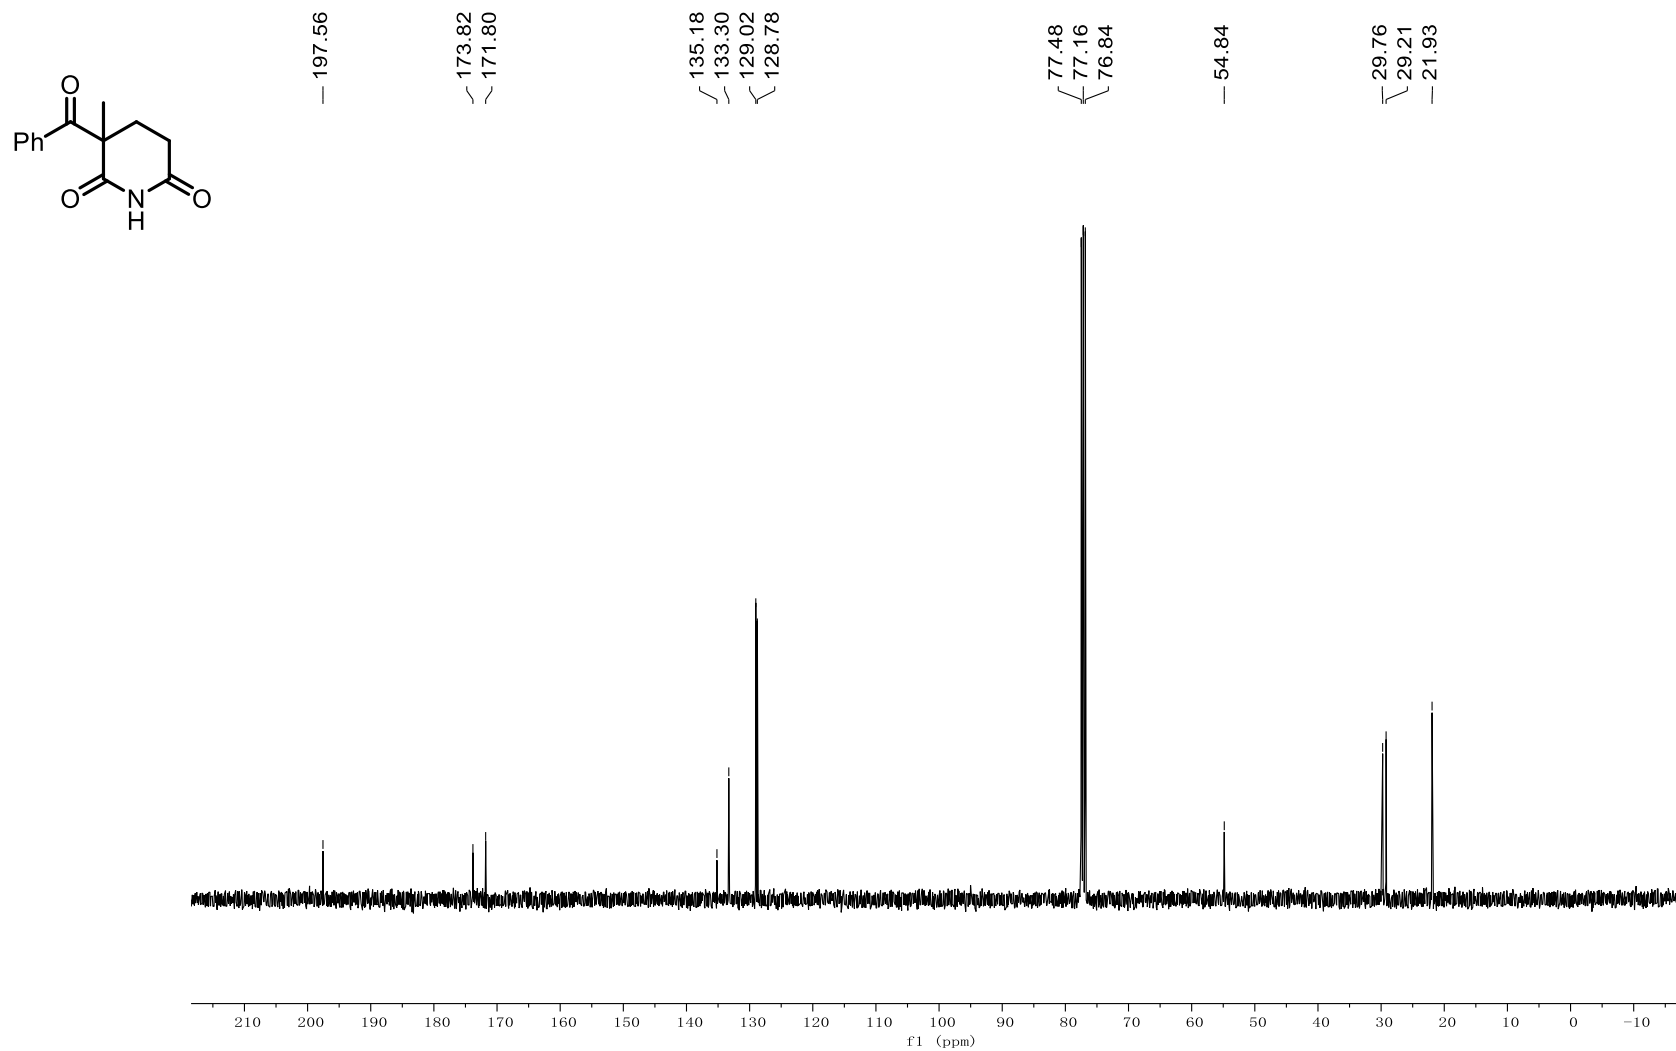

<sup>1</sup>H NMR (400 MHz, CDCl<sub>3</sub>) spectrum of Dimethyl 2-benzoyl-2-methylpentanedioate (73)

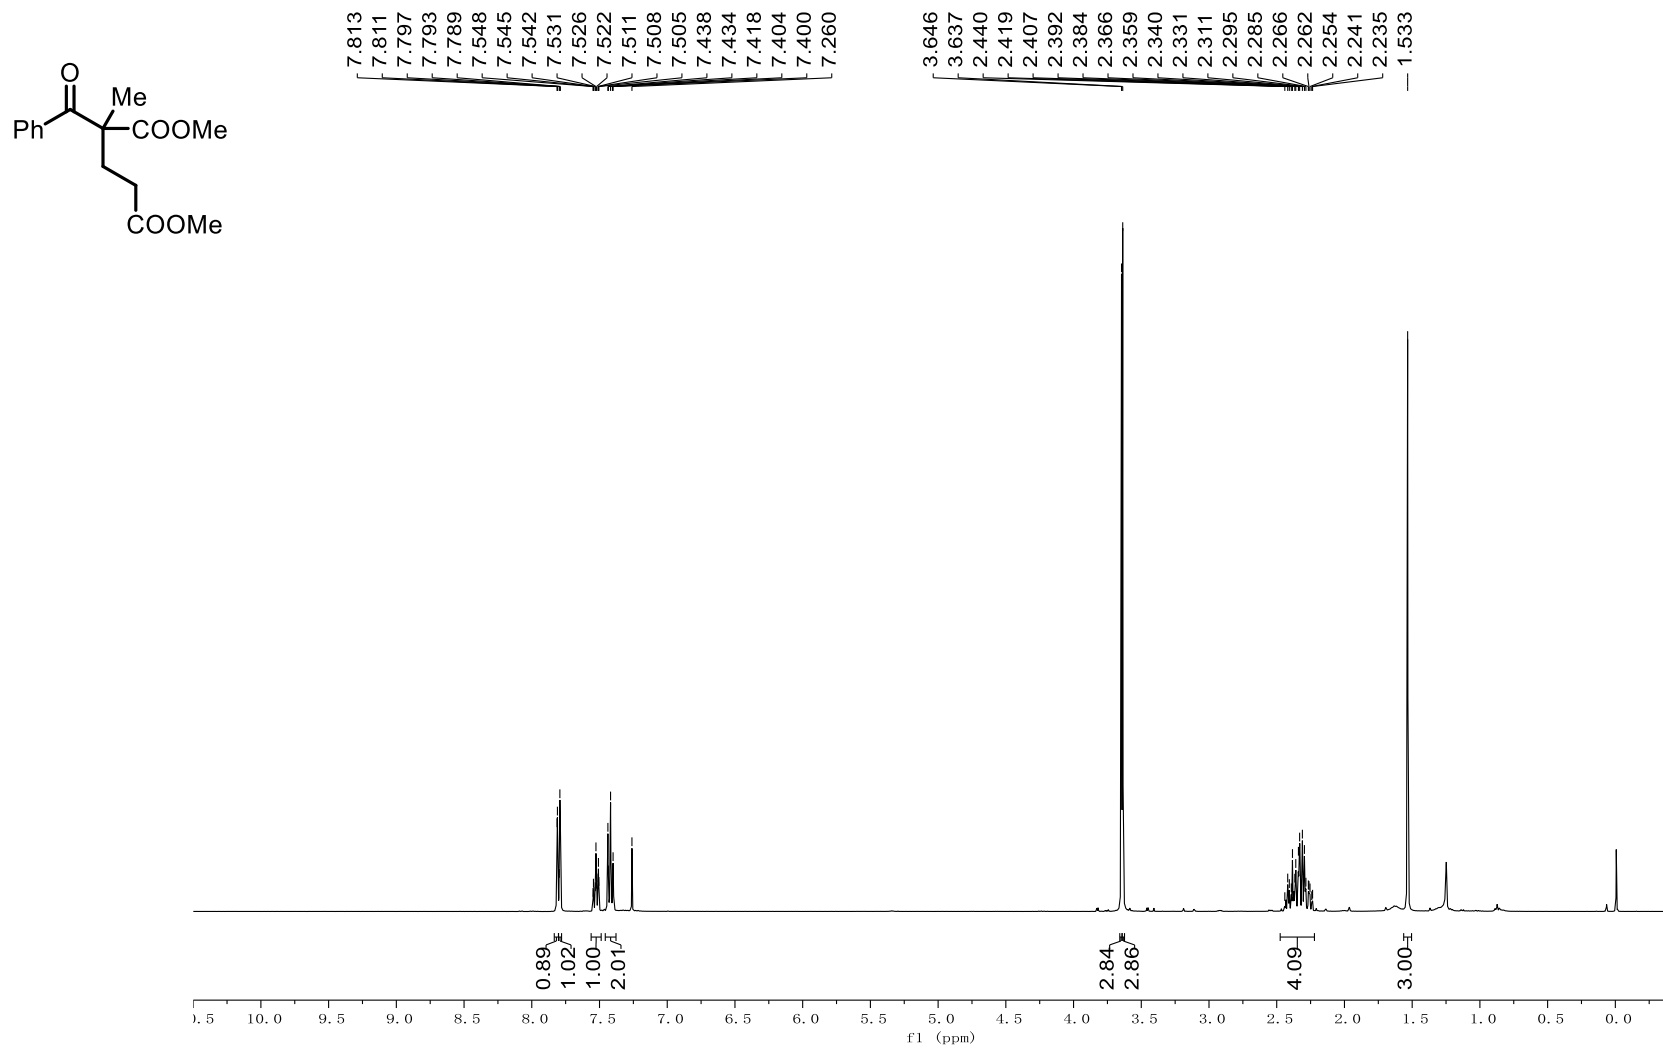

<sup>13</sup>C NMR (100 MHz, CDCl<sub>3</sub>) spectrum of Dimethyl 2-benzoyl-2-methylpentanedioate (73)

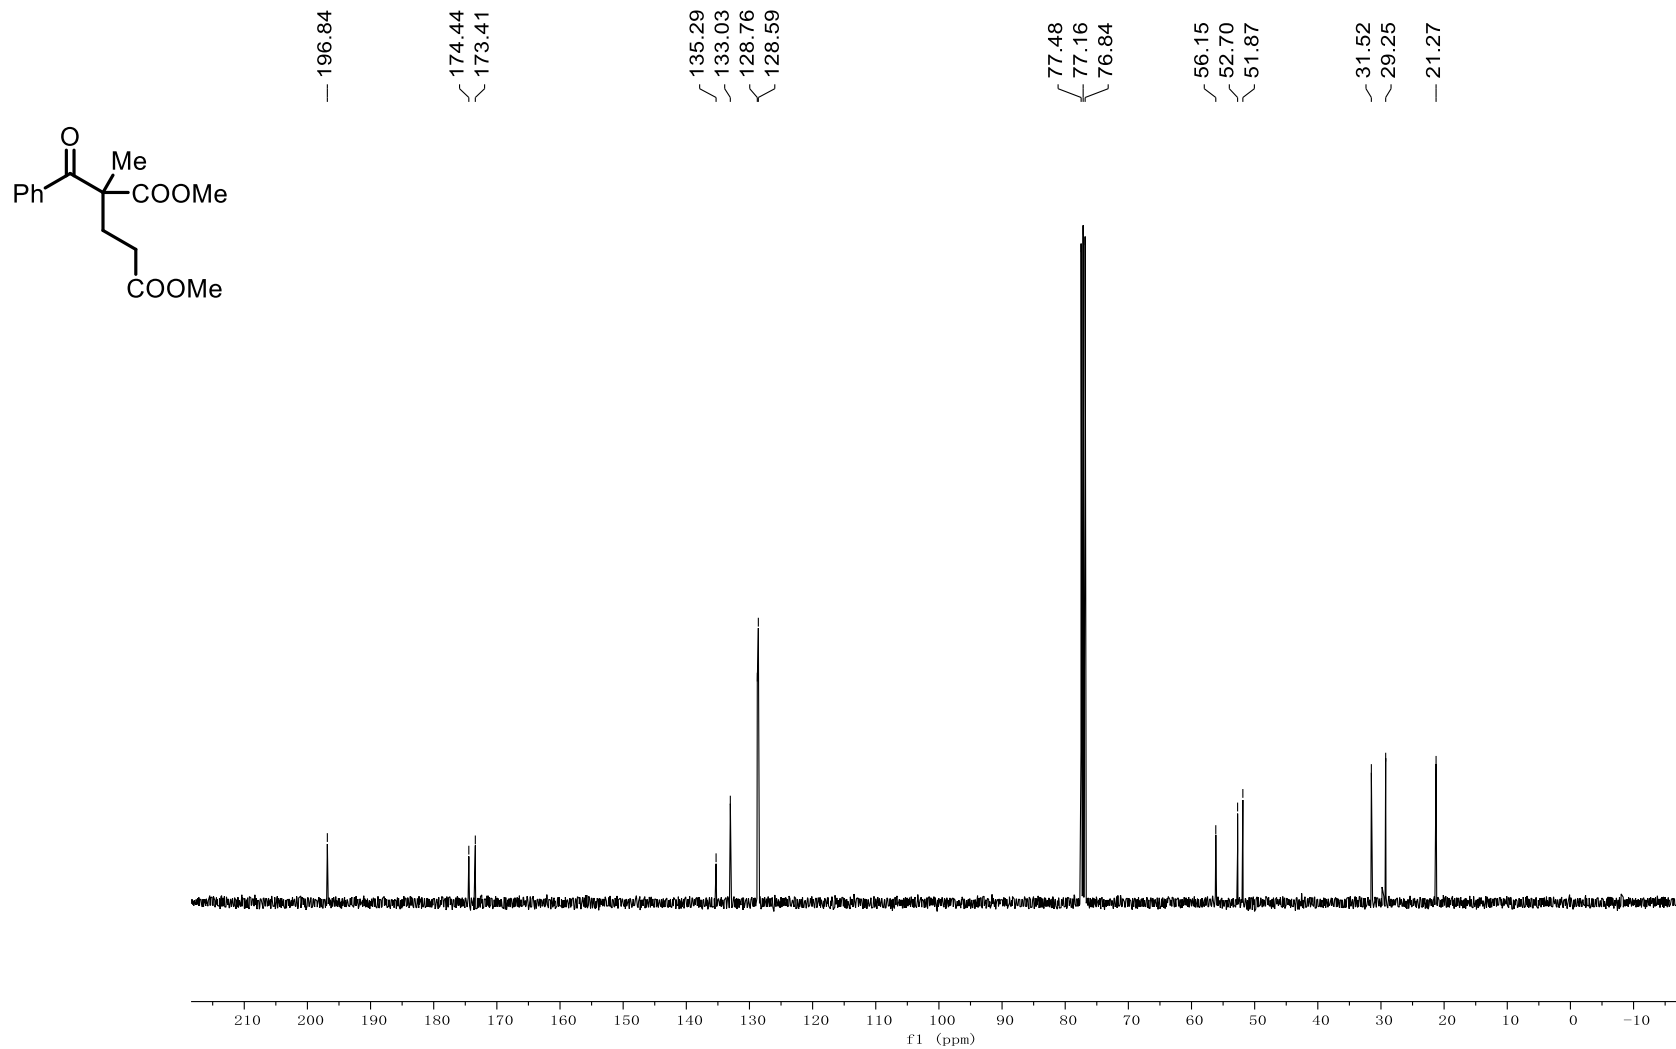

<sup>1</sup>H NMR (400 MHz, CDCl<sub>3</sub>) spectrum of 2-Benzoyl-2-methyl-5-oxo-5-phenylpentanenitrile (74)

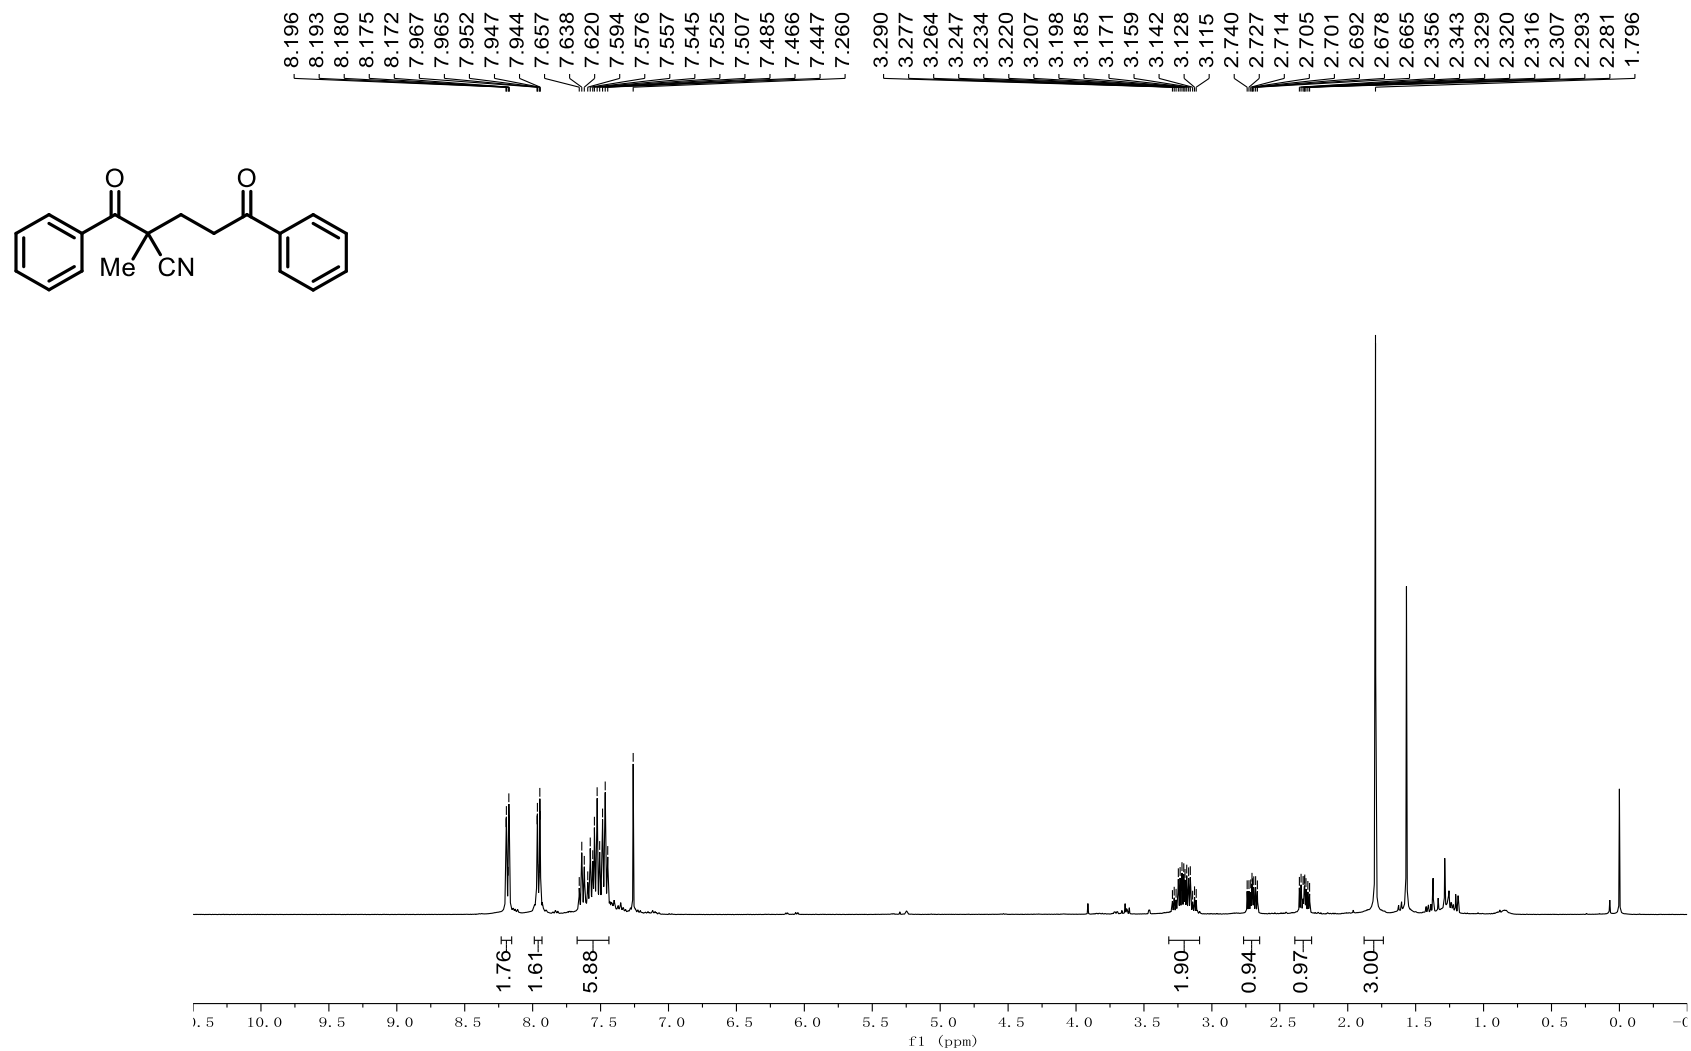

<sup>13</sup>C NMR (100 MHz, CDCl<sub>3</sub>) spectrum of 2-Benzoyl-2-methyl-5-oxo-5-phenylpentanenitrile (74)

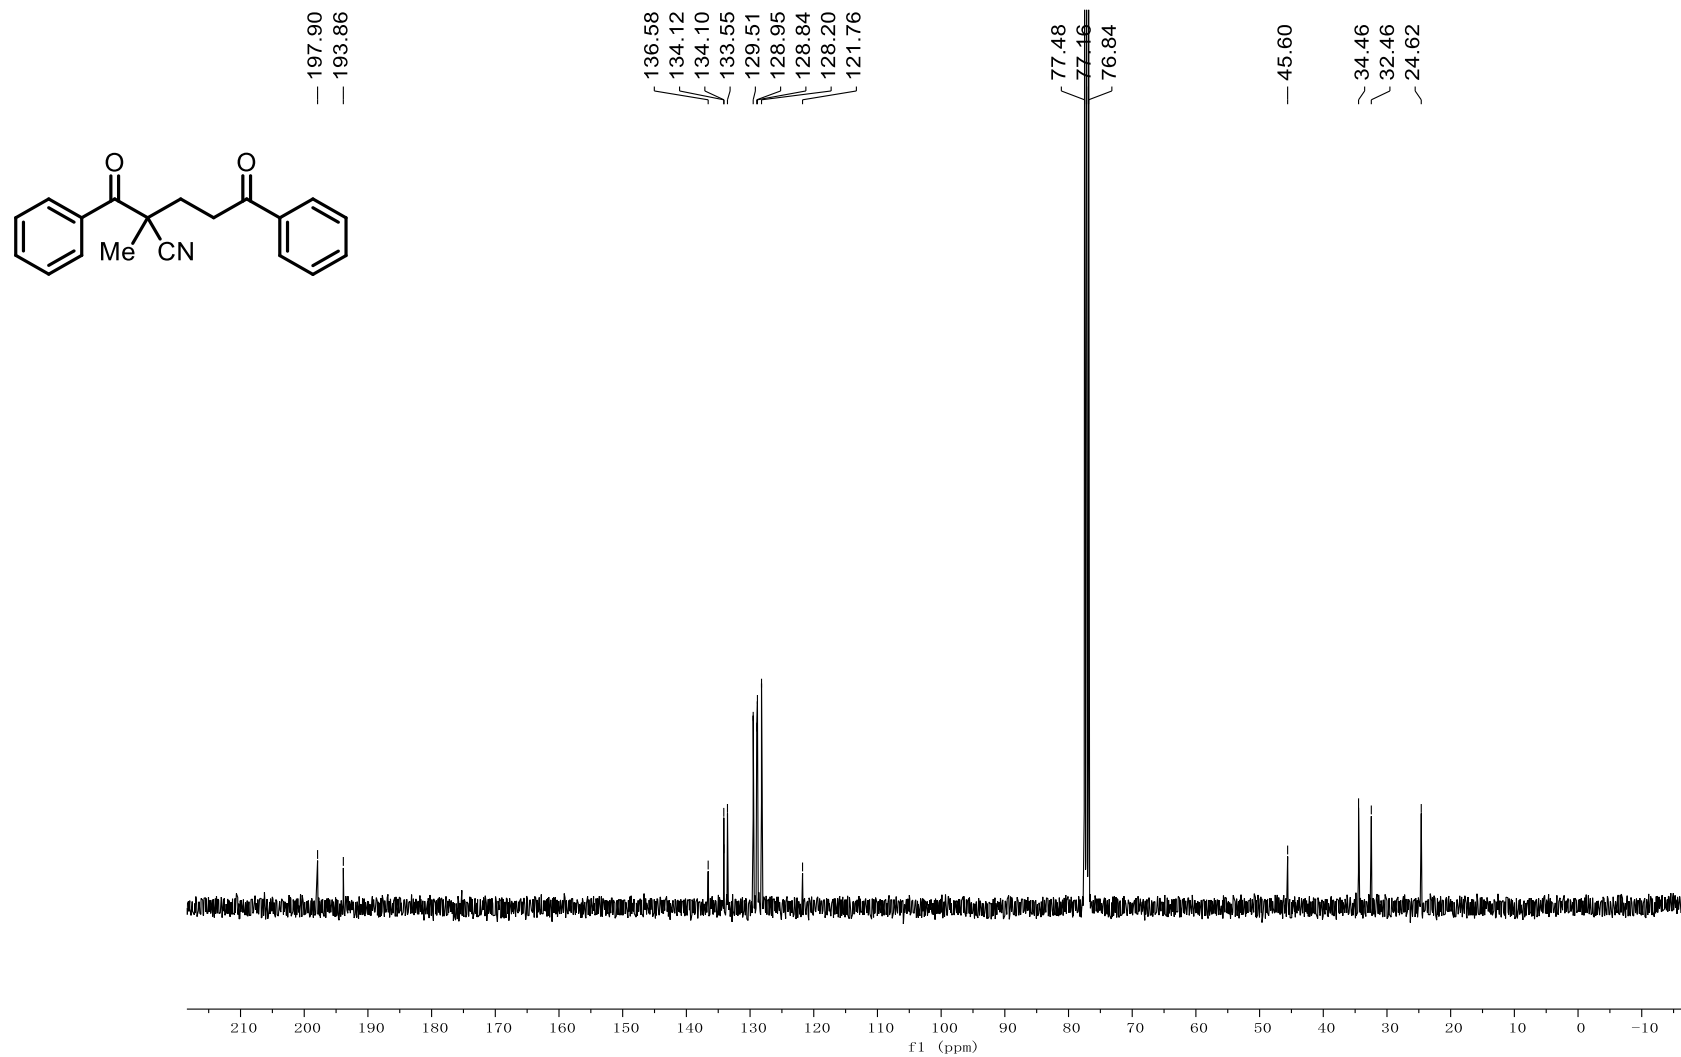

<sup>1</sup>H NMR (400 MHz, benzene-*d*<sub>6</sub>) spectrum of *d*-3-(4-methoxyphenyl)-2-methyl-3-oxopropanenitrile (*d*-9)

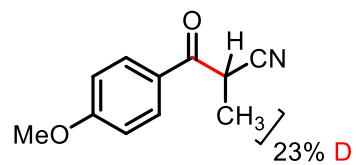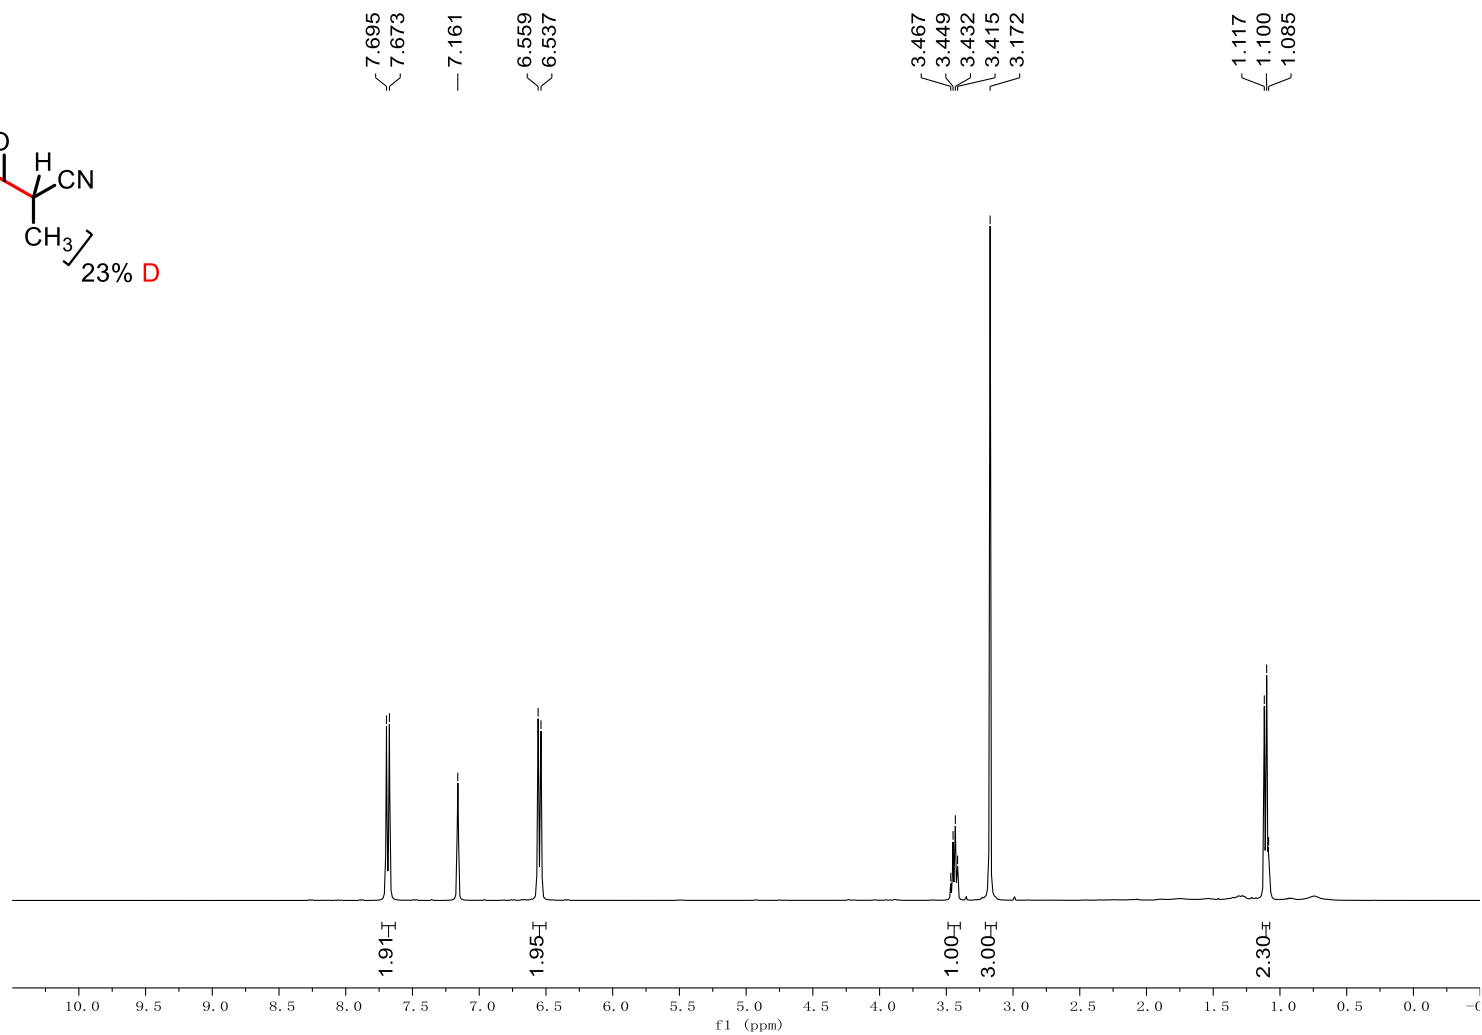

<sup>1</sup>H NMR (400 MHz, benzene-*d*<sub>6</sub>) spectrum of *d*-3-(4-methoxyphenyl)-2-methyl-3-oxopropanenitrile (*d*-47)

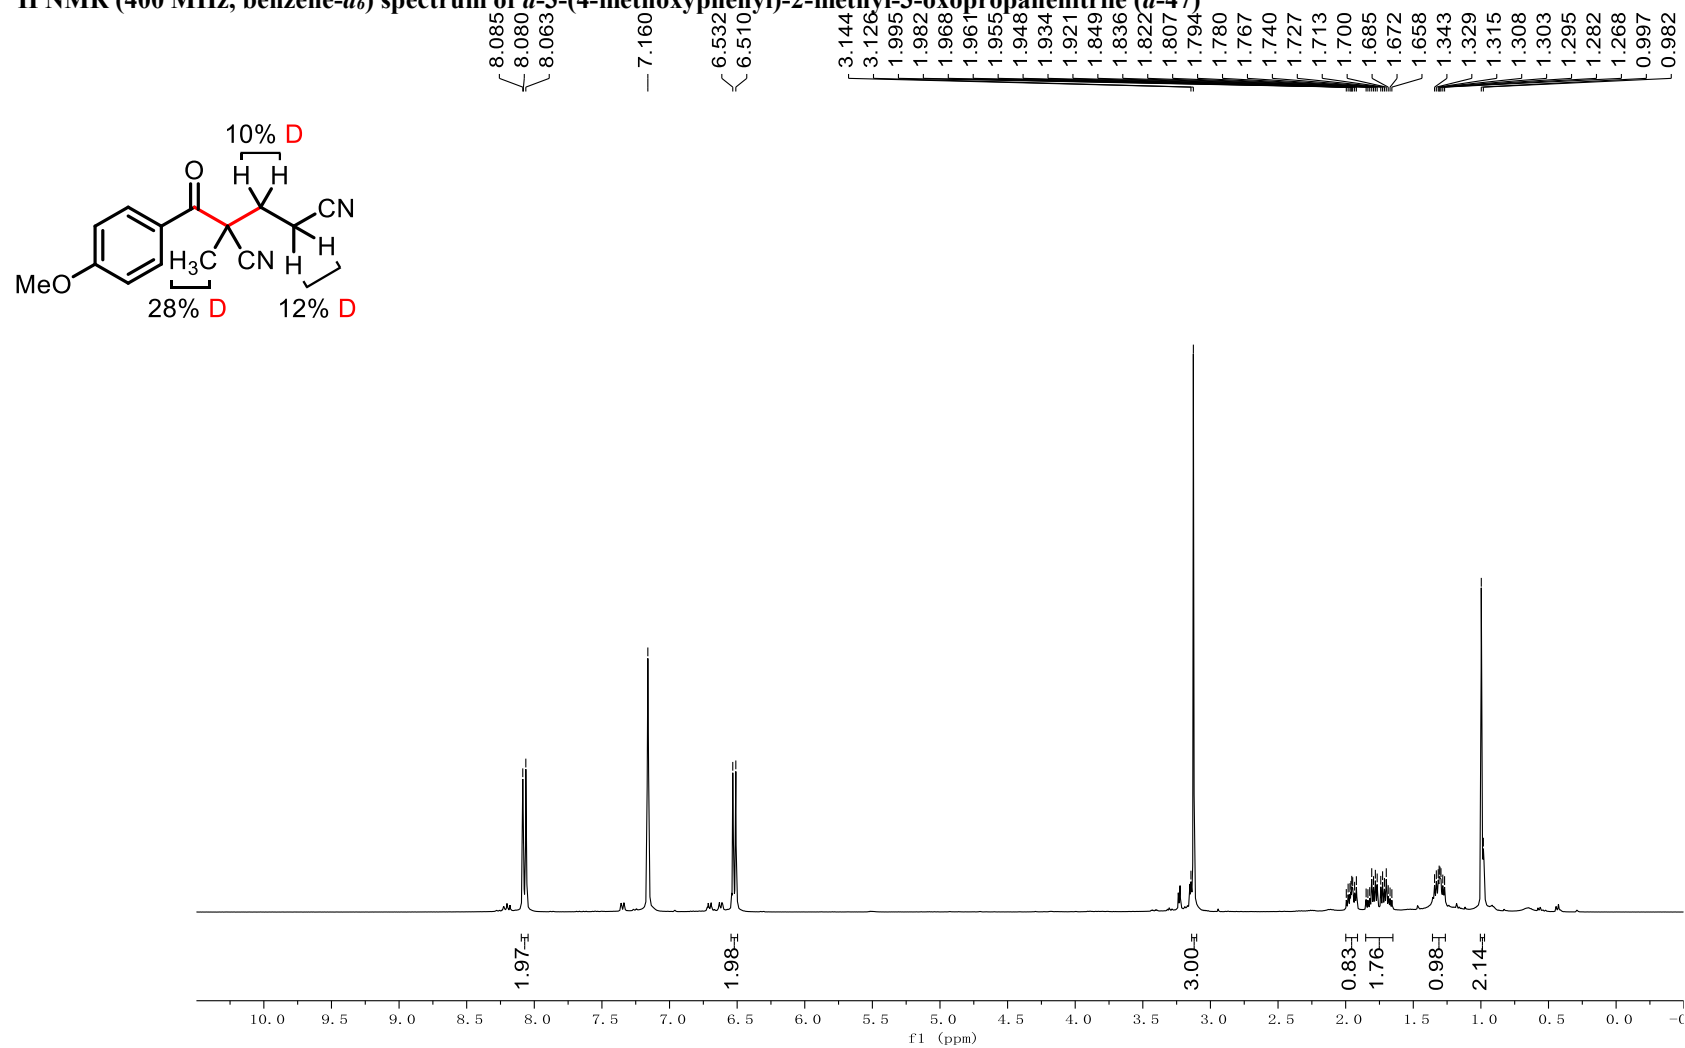

<sup>1</sup>H NMR (400 MHz, CDCl<sub>3</sub>) spectrum of *d*-3-(4-methoxyphenyl)-2-methyl-3-oxopropanenitrile (*d*-78)

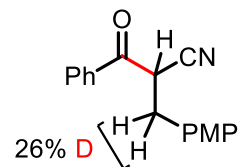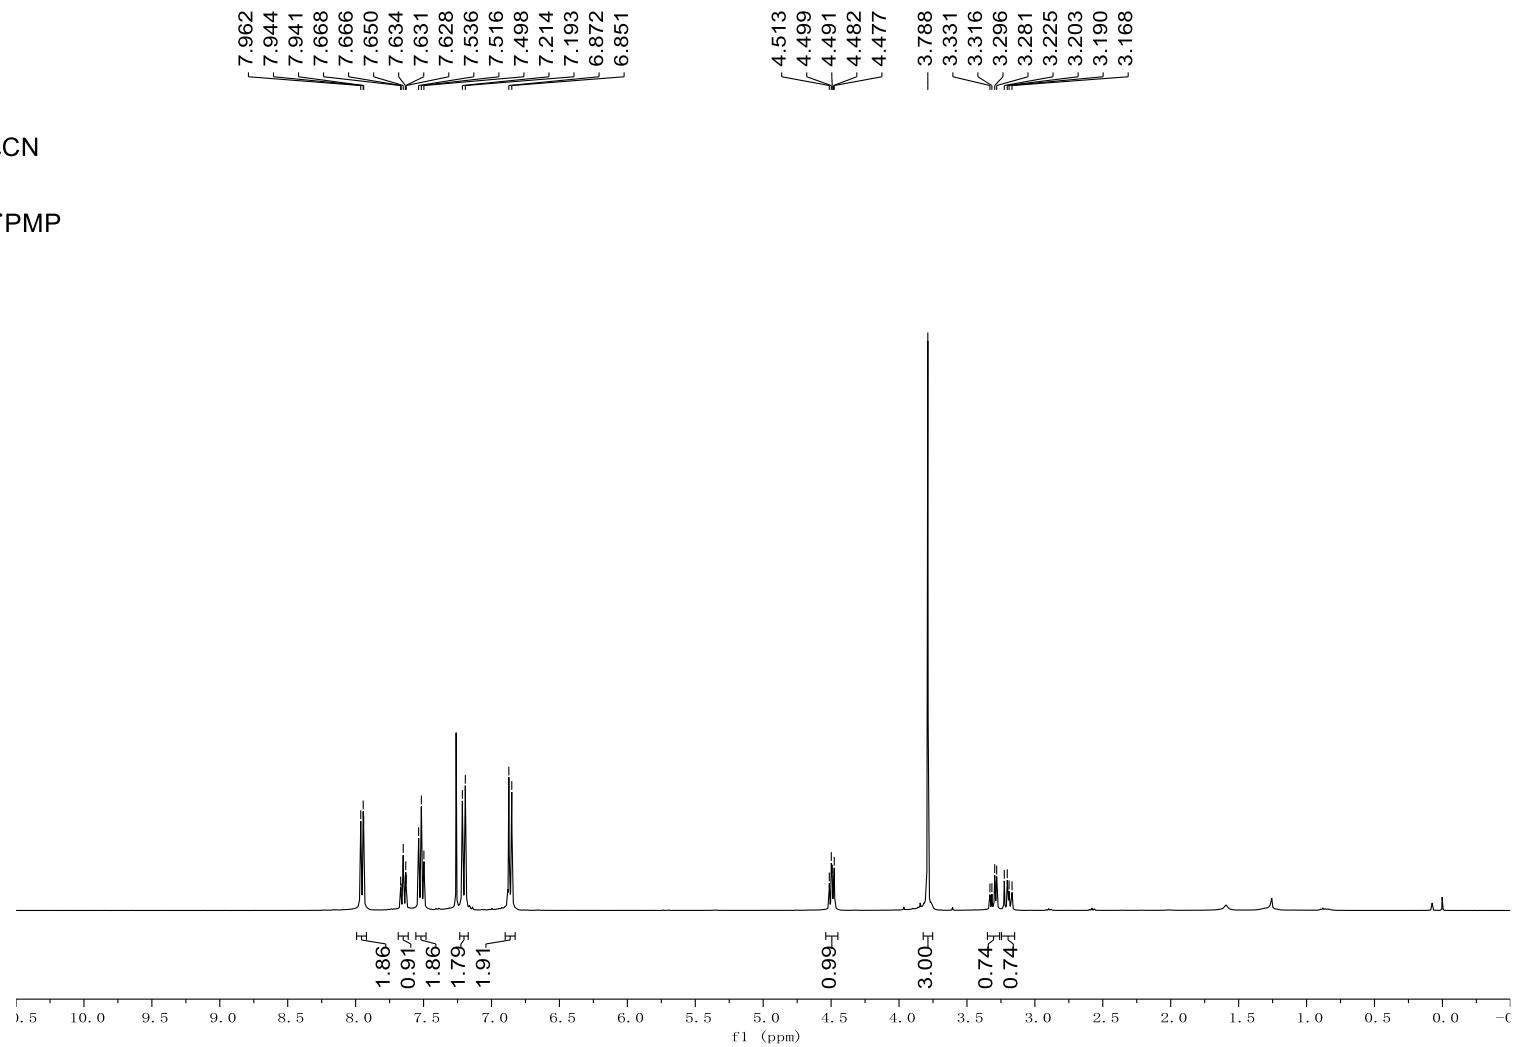

<sup>1</sup>H NMR (400 MHz, CDCl<sub>3</sub>) spectrum of *d*-3-(4-methoxyphenyl)-2-methyl-3-oxopropanenitrile (81)

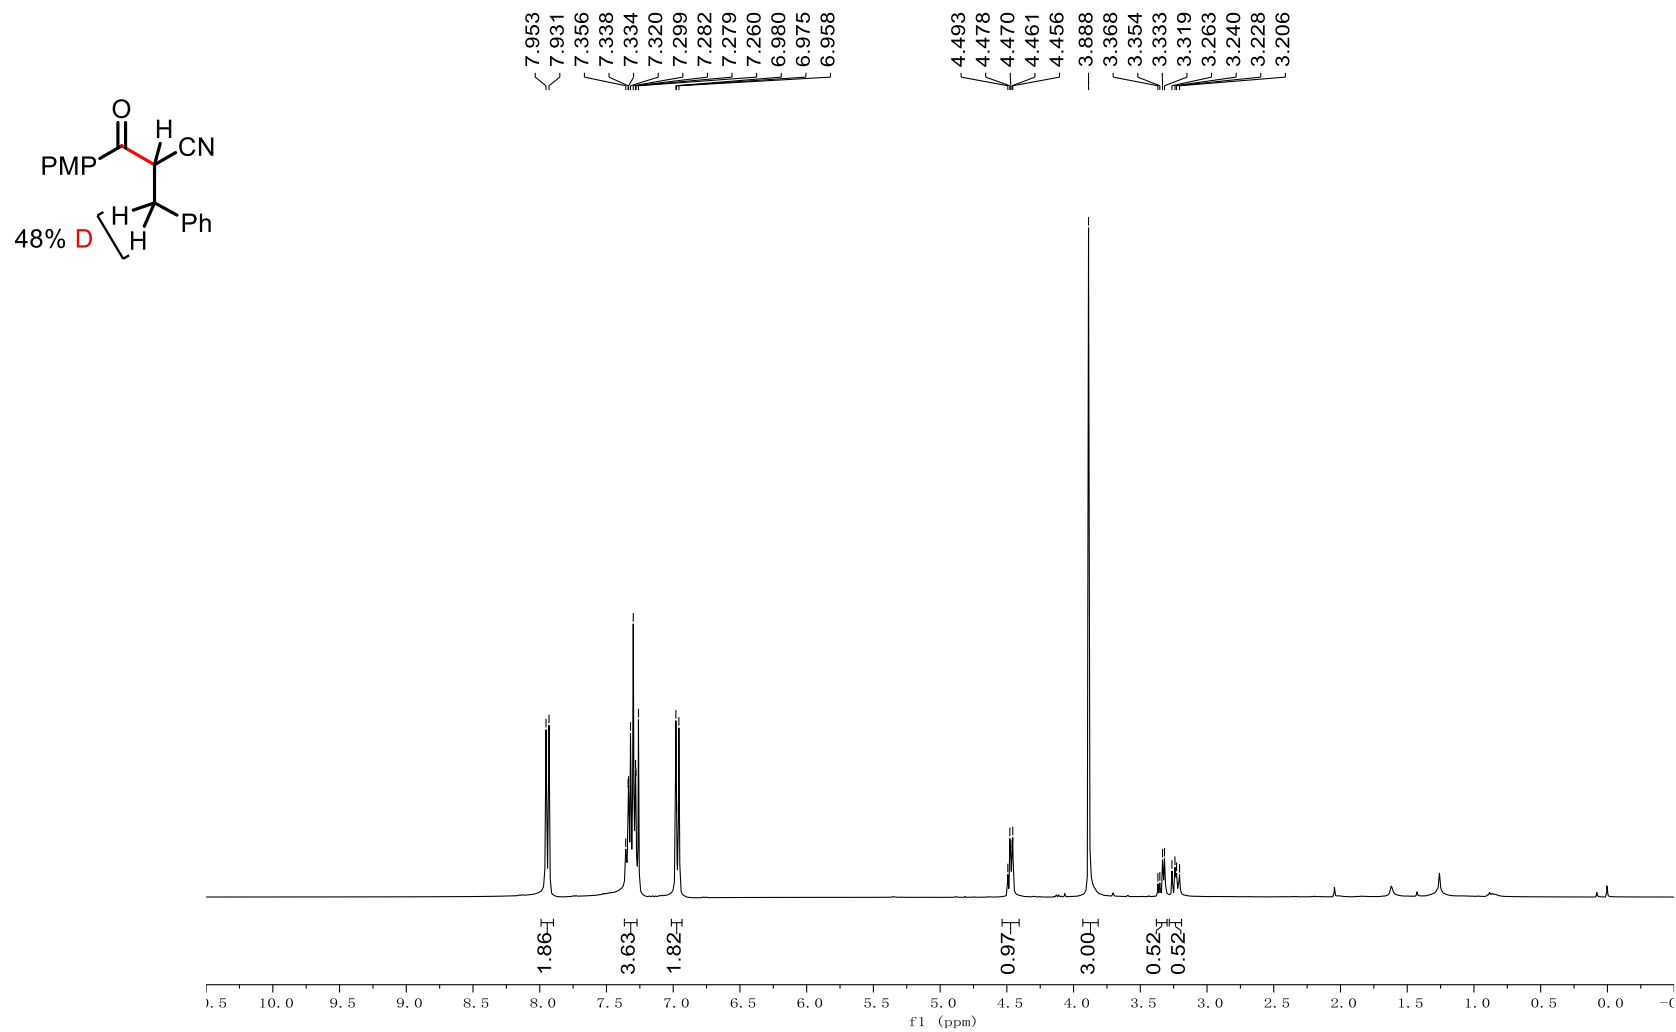

Supplement: d4qo00085d1.pdf [file d4qo00085d1.pdf]
